# Supplementary material for: Late Pleistocene megafauna extinction leads to missing pieces of ecological space in a North American mammal community
Source: PubMed Central journal article supplement — Proc Natl Acad Sci U S A. 2022 Sep 19;119(39):e2115015119. doi: 10.1073/pnas.2115015119 (PMC9522422; doi:10.1073/pnas.2115015119), 2022-09-19
Supplement: pnas.2115015119.sapp.pdf [file pnas.2115015119.sapp.pdf]

# PNAS

www.pnas.org

## Supplementary Information for

Smith et al. 2022. *Late Pleistocene megafauna extinction leads to missing pieces of ecological space in a North American mammal community*

Corresponding author: Felisa A. Smith  
[fasmith@unm.edu](mailto:fasmith@unm.edu)

*This PDF file Includes:*

Supplementary text

Table S1. Summary data for species used in analysis

Table S2. Morphological measurements of fossil species

Table S3. Modern museum morphological data

Table S4. Modern allometric body size regressions

Table S5. Isotopic determinations of fossil animals

Table S6. RMA relationships and  $\delta^{13}\text{C}_{\text{carbonate}} - \delta^{13}\text{C}_{\text{collagen}}$  spacing associated with enamel-collagen offsets

Table S7. T-test results of body size and isotopic values from the Pleistocene to Holocene

Table S8. ANOVA results of isotope values by molar position

Table S9. ANOVA results of isotope values by tooth position, bone category, and tooth versus bone

## SI Materials and Methods

### I. Study region and mammal communities.

We focus on the Edward Plateau of Texas. This geomorphic region of Cretaceous limestones contains many Pleistocene and Holocene cave sites, which have provided a rich abundance of late Quaternary fossils. Today, the Edwards Plateau includes a diversity of vegetation habitats and climatic regimes, with aridity increasing from the east to west; the central portion is a juniper-oak/mesquite-acacia savanna with an understory dominated by  $C_4$  grasses (1–6). In the Pleistocene, this area was likely a more mesic open grassland ecosystem (6), which supported a high diversity of grazing and browsing mammals and their predators (7).

Faunal remains were deposited by a combination of fluvial events and raptor and carnivore accumulation within the cave (8). Thus, although Hall's Cave provides an abundant and diverse fossil record, the taphonomy likely means there is an underrepresentation of the largest-bodied mammals. This is exacerbated by their typically low density on the landscape, which leads to a lower probability of fossilization at any given locality (9). To get around these issues, we included fossils recovered from nearby cave sites to obtain a more complete representation of the local mammal community (5, 8, 10–22). Using methods described in Smith et al. (7), taxa were included in our community if the straight-line distance from the fossil site where they were recovered to Hall's Cave was within the estimated average home range, natal dispersal or typical migration distance for mammals of their size and trophic guild. Faunal lists, ages and geological coordinates were downloaded for other Texas paleontological sites from *NEOTOMA* (<http://www.neotomadb.org>), TMM's Specify (<https://specify-portal.tacc.utexas.edu>) and/or by examining specimens from these sites housed at TMM. These sources and the Paleobiology Database (<https://paleobiodb.org/#/>) were used to verify specimen identity. Bison taxonomy at Lubbock Lake was refined using Johnson (23). A summary of our complete faunal list is provided in Table S1; raw data for body mass is included in Table S2, that for isotopes in Table S5. Only for a subset of our data were body mass and isotopic determinations possible for the same specimen.

### II. Determination of body mass

Generalized body masses for most late Quaternary mammals are available from an updated version of MOM v10.2 (24). However, these data were geographically averaged and moreover, did not allow us to investigate body size as a possible response to the Pleistocene megafauna extinction. Consequently, site-specific body mass was preferentially determined using measurements of cranial and postcranial materials from fossils housed at TMM. For a few taxa (i.e., *Stockoceros sp.*, *Leopardus wiedii*, *Puma concolor*, *Taxidea taxus*, *Glyptotherium floradanum*, *Conepatus leuconotus*, *Bootherium bombifrons*, *Cuvieronius sp.*, *Dasyopus sp.*), we were unable to obtain a site-specific body mass either because of a lack of specimens or the lack of an appropriate regression equation (Tables S1,2). For those species, we relied on the MOM database.

While many studies often employ generalized allometric regressions to translate measurements of elements into body mass, we aimed for family-specific relationships, which were more precise. Hence, using published literature sources (25–40), we obtained the appropriate allometric regression to translate measurements into estimates of body mass (Table S2). However, many elements, or mammal clades, did not have corresponding body mass-element regressions. We took two approaches in such instances.

First, we developed a series of allometric equations for a number of cranial and postcranial elements for several carnivoran families (Canidae, Felidae, Mustelidae and Ursidae) as well as more general ungulate, Afrotheria and Xenarthra groups. We collected cranial (e.g., skull and molar) and post-cranial (e.g., femur, humerus, etc.) measurements, along with tag body mass records, for 291 carnivoran specimens spanning

the body size spectrum from the mammal collections at the Minneapolis Museum of Natural History (Table S3). It was not possible to measure all elements from each museum specimen. In particular, body mass was sometimes missing. However, because body length was generally reported, even if body mass was not, we regressed these measures in R Studio (function `lm()` from package ‘stats’) to develop body mass estimates for those species missing data. Linear regressions were run between each base10 log transformed element and body mass for each carnivorian family and for all carnivores combined, with and without the estimated body mass (Table S4). Because results were invariant, we preferentially employed the regressions based on the full data. We also downloaded long bone data from Campione and Evans for *Xenarthra* and *Afrotheria*, and molar data from Mendoza et al. (33) and conducted similar regressions (Table S4). The developed regressions were used to translate our measurements of fossil materials at TMM into body mass.

Second, when we were unable to obtain specific allometric regressions for particular elements, we calibrated fossil elements against elements where regressions were available. For example, we estimated the body size of several *Smilodon* and *Homotherium* specimens for which we only had upper fourth premolars (UP4s) using allometric regressions for the first lower molar (LM1). To do so, we first calculated the average difference between UP4s and LM1s using digital images of 3 modern specimens of large-bodied felids: *Panthera onca* CN 842 (41), *Panthera tigris* (42) and *Panthera atrox* UF 9076 (Florida Museum Vertebrate Paleontology Database at the University of Florida). Length measurements of corresponding UP4 and LM1 were taken using the Line Tool in ImageJ 1.50i (43), with scale bars used to individually Set Scale. Each length measurement was made 3 times and we used the average to calculate the UP4/LM1 ratio. The standard deviation of all length measurements was below 0.05. Not surprisingly, we found remarkable consistency in the relationship between the size of teeth within felids: the upper fourth premolar was on average 38% longer than the lower first molar, with a standard deviation of approximately 0.06. Consequently, we were able to standardize the UP4 measurements for *Smilodon* and *Homotherium* specimens by dividing each by ~1.38 and then applying the allometric regression for LM1 to estimate body mass. In total, we applied this method to 10 UP4s (7 *Homotherium* and 3 *Smilodon*); all estimated body masses fell well within the range of each species (e.g., Table S2). We judged this approach to be much more defensible than simply using regressions developed for other clades or other molars, as is often done.

Our data were error checked to identify potential outliers: specimens that may have been misidentified as to taxonomic affiliation and/or element by plotting the overall distribution for each taxon at each time interval. Then, the mean, median and standard deviation of site-specific body mass was computed for each time period and the change in mass, if any, computed for surviving mammals. Changes in body mass between Pleistocene and Holocene were assessed using ANOVA and two sample t-test for 13 species, including a comparison between the Pleistocene species *Bison antiquus* and Holocene *Bison bison* (Table S7). ANOVAs and two-sided Welch two sample t-tests were run on each species to determine whether changes were significant using the `avov()` and `t.test()` functions in R 3.6.0 (44) with RStudio (45). We then ran a Bonferroni correction for a significance level of 0.05, with significant differences in mass between time intervals being considered only marginal if the t-test p-values below 0.05 were not also below the corrected value (here, 0.0038). Additionally, we repeated the process for the 5 extant species with both Holocene and Modern mass data (Table S7). ANOVAs and Tukey multiple comparisons of means were to investigate the potential influence of specific locations on our results.

## II. Isotopic determinations and analysis

*Chemical preparation and isotopic analysis.* For most specimens, we analyzed bone collagen, as this tissue provides an integrated estimate of multiple years of dietary information prior to animal death (46, 47). For these, we removed ~100-mg of bone from each specimen using a high-speed Dremel tool. The bone subsamples were then cleaned of sediment and the mineral fraction was removed via 0.25 M hydrochloric acid soaks for 15-72 hours at 5°C. The resulting organic material was rinsed with deionized water three

times and then lipid extracted via three sequential 24 hour soaks in 2:1 chloroform:methanol at room temperature. Following lipid extraction, samples were rinsed thoroughly with deionized water and lyophilized. The  $\delta^{13}\text{C}$  and  $\delta^{15}\text{N}$  values for each sample, along with weight percent [C] and [N], were measured via EA-IRMS using a Costech 4010 elemental analyzer (Valencia, CA) interfaced with a Thermo Scientific Delta V Plus isotope ratio mass spectrometer (Bremen, Germany) at the University of New Mexico Center for Stable Isotopes (UNM CSI, Albuquerque, NM). The within-run standard deviation of multiple organic reference materials run alongside unknown samples was  $\leq 0.2\%$  for both  $\delta^{13}\text{C}$  and  $\delta^{15}\text{N}$  values. As a control for the quality of collagen, we calculated the atomic percent [C]:[N] ratio of each sample from measured weight percent [C]:[N] values. The theoretical range of atomic [C]:[N] from unaltered bone collagen is 2.8–3.6 (48); 760 of our measured specimens fell within this range. In our final dataset, we also included 21 specimens with atomic C:N ratios of 3.7 to 3.8 which had isotopic values within the range of other conspecifics, as well as a singleton *Arctodus* specimen. We removed the remaining 97 samples with atomic [C]:[N]  $\geq 3.9$  from all subsequent analyses.

For some taxa and sites with poor preservation of bone collagen, we extracted apatite from tooth enamel. Each specimen was inspected for signs of enamel degradation. If enamel appeared unaltered, at least 300 micrograms of enamel was collected from a single tooth using a Dremel drill with a diamond bit. Samples were placed in a 3% hydrogen peroxide solution for 15 minutes to remove organics, then triple rinsed with deionized water, followed by a buffered acetic acid treatment to remove secondary carbonates, and a final triple rinse in deionized water. Enamel samples were run at the University of Arkansas (n=41) Stable Isotope Laboratory using a Thermo Scientific Delta Plus XP isotope ratio mass spectrometer with a GasBench II unit (Bremen, Germany) using NBS-19 calcite standards, and at UNM CSI (n=64) using a Thermo Scientific Delta V also equipped with a GasBench II unit.

*Isotopic corrections: collagen-enamel  $\delta^{13}\text{C}$  spacing.* In order to directly compare isotopic data from extracted bone collagen and tooth enamel, we corrected enamel values to collagen-equivalents as has been done elsewhere (49). The carbon isotope composition of bone collagen and apatite are positively correlated, with bone collagen having lower  $\delta^{13}\text{C}$  values than apatite (49). However, the magnitude of this isotopic offset ( $\Delta^{13}\text{C}_{\text{apatite-collagen}}$ ) varies as a function of digestive physiology (50), and we further explored the offset between collagen and enamel using data sourced from Codron et al. (49). First, using reduced major axis, we regressed collagen and apatite  $\delta^{13}\text{C}$  values collected from the same individuals to explore variation in apatite-collagen relationships by herbivore digestion type (ruminant and non-ruminants) and carnivore guild (canids, felids) (49). All regressions were highly significant and although intercepts varied, most slopes did not deviate from the one-to one line (Table S6). Second, we computed the average offset between collagen and apatite among herbivore digestion types and carnivore guilds (Table S6). Previous work suggests that herbivores generally have larger offsets than carnivores, and among herbivores, ruminants have larger offsets than non-ruminants (46). However, while we found this to be true for herbivores and carnivores, ruminants and non-ruminants shared essentially the same offsets (Table S6). Here, we used offsets computed from the Codron et al. dataset to correct our measured enamel values to collagen equivalents (Table S5): ruminants ( $8.8 \pm 2.2\%$ ), non-ruminants ( $8.8 \pm 1.8\%$ ) canids ( $5.0 \pm 1.2\%$ ) and felids ( $4.4 \pm 1.2\%$ ). This approach has been used extensively in the literature (49).

*Influence of tissue type.* The isotope samples in our dataset were taken from a variety of bone and tooth elements, hence, we examined if results were biased by skeletal element. Using our dataset (Table S5), we ran a series of ANOVAs with Bonferroni corrections to examine whether  $\delta^{13}\text{C}$  and  $\delta^{15}\text{N}$  values were influenced by the element analyzed. We assigned bone tissues into one of five simplified categories: skull, tooth root, body, limb, and undetermined bone. Analyses were conducted for each time interval (Pleistocene and Holocene) between the raw  $\delta^{13}\text{C}$  values from enamel across tooth elements, and the raw  $\delta^{13}\text{C}$  and  $\delta^{15}\text{N}$  values from collagen across our five bone element categories. We also ran analyses of corrected  $\delta^{13}\text{C}$  values for all teeth lumped together into a single "tooth" category against our simplified collagen categories to check for potential biases that might arise from mixing 'collagen equivalents' (i.e., corrected  $\delta^{13}\text{C}$  values

derived from tooth enamel) with our collagen values. Finally, we downloaded the raw isotopic data presented in the Codron et al. (49) study, which included element type (bone, molar and molar positions) and analyzed taxa for whom multiple elements were sampled. Here, we were able to compare molar position, and molar *versus* bone samples, for 9 additional mammal species.

We found no difference in  $\delta^{13}\text{C}$  and  $\delta^{15}\text{N}$  values of collagen between elements (including between tooth root and other bone collagen elements), or among corrected  $\delta^{13}\text{C}$  values of bone and tooth samples (Table S8, S9). It was interesting that  $\delta^{13}\text{C}$  values did not differ by tooth position (Table S8, S9), despite differences in time of eruption during ontogeny. Indeed, only one comparison was significant after Bonferroni correction for multiple comparisons (bone *versus* M3; Table S8). Thus, we conclude that combining enamel- and collagen-derived values, and/or different adult molar types, did not produce biases in our dataset. Consequently, while we report these data separately in Table S1 for complete transparency, our figures combine data from bone collagen representing multiple elements, as well as corrected enamel  $\delta^{13}\text{C}$  values.

*Statistical analysis with isotopic data.* As was done with mass, changes in  $\delta^{13}\text{C}$  and  $\delta^{15}\text{N}$  values between the Pleistocene and Holocene were assessed using ANOVA and two-sided Welch two sample t-tests. A Bonferroni correction using a significance level of 0.05 was employed (corrected significance value = 0.0035; Table S7). ANOVAs and Tukey multiple comparisons of means were also run to examine if  $\delta^{13}\text{C}$  and  $\delta^{15}\text{N}$  values of species varied by location.

*Exploring the diet of ancient carnivores.* We characterized the dietary space for Pleistocene felids and canids and Holocene jaguars to explore patterns in prey preferences among carnivore guilds. (Fig. 3). We first computed weighted averages of  $\delta^{13}\text{C}$  and  $\delta^{15}\text{N}$  for each herbivore functional guild (browsers, mixed feeders, and grazers; excluding *Lepus* and *Sylvilagus*) from species level averages. For the error bars around each prey group, we computed a propagated standard deviation, calculated using the variability in the  $\delta^{13}\text{C}$  and  $\delta^{15}\text{N}$  values of each herbivore guild as well as uncertainty in trophic discrimination factors (i.e., 1.0‰ for both isotope systems). Hence, prey error bars =  $(\sigma^2_{\text{herbivore guild}} + \sigma^2_{\text{discrimination}})^{1/2}$ . We used predator-prey trophic discrimination factors (collagen-collagen TDFs) of 1.0‰ and 4.5‰ for  $\delta^{13}\text{C}$  and  $\delta^{15}\text{N}$ , respectively. While 3‰ is often used as a standard trophic discrimination factor, hypercarnivores tend to have larger offsets due to high protein consumption (52, 53). After accounting for TDFs, the isotopic values of *Homotherium* and *Smilodon* were situated on the very edge of the potential prey space, indicating a potential missing source (Fig. 3a). Given previous hypotheses about the diet of these animals (54, 55), we subsequently included juvenile grazers as a possible food source by using the weighted mean isotope value of Pleistocene grazers in our dataset and employing a mother-young trophic discrimination factor of 0.5‰ for  $\delta^{13}\text{C}$ , and 1.5‰ for  $\delta^{15}\text{N}$ .

## References

1. J.A. Teeri, L.G. Stowe, Climatic patterns and the distribution of C4 grasses in North America. *Oecologia* **23**, 1–12 (1976).
2. D.D. Diamond, F.E. Smeins, Composition, Classification and Species Response Patterns of Remnant Tallgrass Prairies in Texas. *The American Midland Naturalist* **113**, 294–308 (1985).
3. R.S. Jones, Studies of freshwater inflow effects on the Lavaca River Delta and Lavaca Bay, Texas. *Interim data status report, August 1985* (1985) <https://doi.org/10.15781/T2Z02ZR0Z>.
4. M.B. Collins, “The archaeological sequence at Kincaid rockshelter, Uvalde county, Texas” in *Transactions of the 25th Regional Archaeological Symposium for Southeastern New Mexico and Western Texas*, (Midland Archaeological Society, 1990), pp. 25–32.
5. R.S. Toomey, M.D. Blum, S. Valastro, Late Quaternary climates and environments of the Edwards Plateau, Texas. *Global and Planetary Change* **7**, 299–320 (1993).

6. J.P. Joines, "17,000 years of climate change: The phytolith record from Hall's Cave, Texas," Oklahoma State University. (2011).
7. F.A. Smith, *et al.*, Unraveling the consequences of the terminal Pleistocene megafauna extinction on mammal community assembly. *Ecography* **39**, 223–239 (2016).
8. R.S. Toomey III, "Late Pleistocene and Holocene faunal and environmental changes at Hall's Cave, Kerr County, Texas." (1993).
9. A. K. Behrensmeier, R. W. Hook, "Paleoenvironmental contexts and taphonomic modes in the terrestrial fossil record" in *Terrestrial Ecosystems Through Time*, A. K. Behrensmeier, *et al.*, Eds. (University of Chicago Press, 1992), pp. 15–136.
10. W.W. Dalquest, E. Roth, F. Judd, The mammal fauna of Schulze Cave, Edwards County, Texas. *Bulletin Florida State Museum* **13**, 205–276 (1969).
11. G.L. Evans, The Friedenbahn Cave. *Bulletin of the Texas Memorial Museum* **September**, 3–22 (1961).
12. R.M. Frank, The Vertebrate Paleontology of Texas Caves. *Texas Speleological Survey* **2**, 1–43 (1965).
13. R.W. Graham, Late Wisconsin mammalian faunas and environmental gradients of the eastern United States. *Paleobiology* **2**, 343–350 (1976).
14. A.H. Harris, *Late Pleistocene vertebrate paleoecology of the West* (University of Texas Press, 1985).
15. E.L. Lundelius Jr, "Late-Pleistocene and Holocene faunal history of central Texas" in *Pleistocene Extinctions: The Search for a Cause*, P.S. Martin, H.E. Wright Jr, Eds. (Yale University Press, 1967), pp. 288–319.
16. E.L. Lundelius Jr, B.H. Slaughter, *Vertebrate Remains in Texas Caves* (Natural History of Texas Caves: Gulf Natural History, 1971).
17. E.L. Lundelius Jr, "Post-Pleistocene mammals from Pratt Cave and their environmental significance" in *Biological Investigations in the Guadalupe Mountains National Park, Texas*, H.H. Genoways, R.J. Baker, Eds. (National Park Service Proceedings and Transactions, 1979), pp. 1–442.
18. E.L. Lundelius Jr, "A late Pleistocene mammalian fauna from Cueva Quebrada, Val Verde County, Texas" in *Contributions in Quaternary Vertebrate Paleontology: A Volume in Memorial to John E. Guilday*, H.H. Genoways, M.R. Dawson, Eds. (Carnegie Museum of Natural History, 1984), pp. 456–481.
19. E.L. Lundelius Jr, "Pleistocene Vertebrates from Laubach Cave" in *Edwards Aquifer-Northern Segment*, C. M. Woodruff Jr, F. Snyder, L. De La Garze, R. M. Slade Jr, Eds. (Austin Geological Society Guidebook, 1985), pp. 41–45.
20. E.L. Roth, Late Pleistocene Mammals from Klein Cave, Kerr County, Texas. (1972).
21. R.S. Toomey III, J.A. Huebner, T.W. Boutton, Stable carbon isotope ratios of *Equus sp.* and *Bison antiquus* from the Late Pleistocene deposits at Hall's Cave, Kerr County, Texas. *Current Research in the Pleistocene* **9**, 112–114 (1992).
22. R.S. Toomey, Vertebrate Paleontology of Texas Caves. 51–68 (1994).
23. E.M. Johnson, "Investigations into the zooarchaeology of the Lubbock Lake Site," Texas Tech University. (1976).
24. F.A. Smith, *et al.*, Body Mass of Late Quaternary Mammals. *Ecology* **84**, 3403–3403 (2003).
25. O. W. Johnson, I. O. Buss, Molariform Teeth of Male African Elephants in Relation to Age, Body Dimensions, and Growth. *Journal of Mammalogy* **46**, 373–384 (1965).
26. J. Hanks, Growth of the African elephant (*Loxodonta africana*). *African Journal of Ecology* **4**, 251–272 (1972).
27. R.M. Laws, I.S. C. Parker, R.C.B. Johnstone, *Elephants and their habitats* (Clarendon Press, 1975).
28. J. Damuth, B.J. MacFadden, *Body Size in Mammalian Paleobiology: Estimation and Biological Implications* (Cambridge University Press, 1990).

29. M.T. Alberdi, J.L. Prado, E. Ortiz-Jaureguizar, Patterns of body size changes in fossil and living Equini (Perissodactyla). *Biological Journal of the Linnean Society* **54**, 349–370 (1995).
30. A. Turner, H.O. Regan, The assessment of size in fossil felidae. *Estudios Geológicos* **58**, 45–54 (2002).
31. P. Christiansen, Body size in proboscideans, with notes on elephant metabolism. *Zoological Journal of the Linnean Society* **140**, 523–549 (2004).
32. P. Christiansen, J.M. Harris, Body size of Smilodon (Mammalia: Felidae). *Journal of Morphology* **266**, 369–384 (2005).
33. M. Mendoza, C.M. Janis, P. Palmqvist, Estimating the body mass of extinct ungulates: a study on the use of multiple regression. *Journal of Zoology* **270**, 90–101 (2006).
34. B. Figueirido, J. A. Pérez-Claros, R. M. Hunt, P. Palmqvist, Body Mass Estimation in Amphicyonid Carnivoran Mammals: A Multiple Regression Approach from the Skull and Skeleton. *Acta Palaeontologica Polonica* **56**, 225–246 (2011).
35. N.E. Campione, D.C. Evans, A universal scaling relationship between body mass and proximal limb bone dimensions in quadrupedal terrestrial tetrapods. *BMC Biol* **10**, 60 (2012).
36. T. Tsubamoto, Estimating Body Mass from the Astragalus in Mammals. *acpp* **59**, 259–265 (2014).
37. T. Tsubamoto, Relationship between the calcaneal size and body mass in primates and land mammals. *Anthropological Science* **advpub** (2019).
38. B. Moncunill-Solé, J. Quintana, X. Jordana, P. Engelbrektsson, M. Köhler, The weight of fossil leporids and ochotonids: body mass estimation models for the order Lagomorpha. *Journal of Zoology* **295**, 269–278 (2015).
39. M.I. Pardi, “A multidimensional investigation of the niche: geographic distributions, body size, and interspecific interactions of late Quaternary North American Canidae,” University of New Mexico. (2016).
40. A.M. Jukar, S.K. Lyons, M.D. Uhen, A cranial correlate of body mass in proboscideans. *Zoological Journal of the Linnean Society* **184**, 919–931 (2018).
41. P. Christiansen, The Making of a Monster: Postnatal Ontogenetic Changes in Craniomandibular Shape in the Great Sabercat Smilodon. *PLOS ONE* **7**, e29699 (2012).
42. T. Wilson, D.E. Wilson, J.M. Zimanske, Pneumothorax as a predatory goal for the sabertooth cat (*Smilodon fatalis*). **2013** (2013).
43. W.S. Rasband, *ImageJ* (U.S. National Institutes of Health, 1997).
44. R Core Team, *R: A language and environment for statistical computing*. (R Foundation for Statistical Computing, 2019).
45. RStudio Team, *RStudio: Integrated Development for R*. (RStudio, 2019).
46. P.L. Koch, “Isotopic study of the biology of modern and fossil vertebrates” in *Stable Isotopes in Ecology and Environmental Science*, (John Wiley & Sons, 2007), pp. 99–154.
47. M.T. Clementz, New insight from old bones: stable isotope analysis of fossil mammals. *Journal of Mammalogy* **93**, 368–380 (2012).
48. S.H. Ambrose, Preparation and characterization of bone and tooth collagen for isotopic analysis. *Journal of Archaeological Science* **17**, 431–451 (1990).
49. D. Codron, et al., Within trophic level shifts in collagen–carbonate stable carbon isotope spacing are propagated by diet and digestive physiology in large mammal herbivores. *Ecology and Evolution* **8**, 3983–3995 (2018).
50. B.H. Passey, et al., Carbon isotope fractionation between diet, breath CO<sub>2</sub>, and bioapatite in different mammals. *Journal of Archaeological Science* **32**, 1459–1470 (2005).
51. D. Codron, et al., Significance of diet type and diet quality for ecological diversity of African ungulates. *Journal of Animal Ecology* **76**, 526–537 (2007).
52. J.B. Coltrain, et al., Rancho La Brea stable isotope biogeochemistry and its implications for the palaeoecology of late Pleistocene, coastal southern California. *Palaeogeography, Palaeoclimatology, Palaeoecology* **205**, 199–219 (2004).

53. K. Fox-Dobbs, J.K. Bump, R.O. Peterson, D.L. Fox, P.L. Koch, Carnivore-specific stable isotope variables and variation in the foraging ecology of modern and ancient wolf populations: case studies from Isle Royale, Minnesota, and La Brea. *Can. J. Zool.* **85**, 458–471 (2007).
54. R.W. Graham, E. L. Lundelius, L. Meissner, “Friesenhahn Cave: Late Pleistocene paleoecology and predator- prey relationships of mammoths with an extinct scimitar cat” in *Late Cretaceous to Quaternary Strata and Fossils of Texas: Field Excursions Celebrating 125 Years of GSA and Texas Geology, GSA South-Central Section Meeting, Austin, Texas, April 2013*, (Geological Society of America, 2013), pp. 15–31.
55. L.R.G. DeSantis, R.S. Feranec, M. Antón, E.L. Lundelius, Dietary ecology of the scimitar-toothed cat *Homotherium serum*. *Current Biology* **31**, P2674-P2681 (2021).



**Table S1. Meso- and Mega Mammal Species Summary for Hall's Cave Community. See Tables S2 and S5 for raw morphology and isotope data**

| Status             | Order        | Family         | Genus                 | Species                        | Common Name                                      | Main Trophic Category | Body Mass (kg) | MOM Log Mass (g) | Pleistocene |                         |                          |                                                |            |                                  |                                   |                         |                               |          |                                     |                                      |        |                         | Holocene                 |                                            |            |                                  |                                   |                         |                          |          | Comments |                                     |                                      |
|--------------------|--------------|----------------|-----------------------|--------------------------------|--------------------------------------------------|-----------------------|----------------|------------------|-------------|-------------------------|--------------------------|------------------------------------------------|------------|----------------------------------|-----------------------------------|-------------------------|-------------------------------|----------|-------------------------------------|--------------------------------------|--------|-------------------------|--------------------------|--------------------------------------------|------------|----------------------------------|-----------------------------------|-------------------------|--------------------------|----------|----------|-------------------------------------|--------------------------------------|
|                    |              |                |                       |                                |                                                  |                       |                |                  | N mass      | Site Specific Mass (kg) | Site Specific Mass Stdev | Number sampled for Stable Isotope Analysis (3) | N collagen | Mean Collagen $\delta^{13}C$ (‰) | Collagen $\delta^{13}C$ Stdev (‰) | Mean $\delta^{15}N$ (‰) | Mean $\delta^{15}N$ Stdev (‰) | N enamel | Corrected enamel $\delta^{13}C$ (‰) | Mean Enamel $\delta^{13}C$ Stdev (‰) | N mass | Site Specific Mass (kg) | Site Specific Mass Stdev | Number sampled for Stable Isotope Analysis | N collagen | Mean Collagen $\delta^{13}C$ (‰) | Collagen $\delta^{13}C$ Stdev (‰) | Mean $\delta^{15}N$ (‰) | $\delta^{15}N$ Stdev (‰) | N enamel |          | Corrected enamel $\delta^{13}C$ (‰) | Mean Enamel $\delta^{13}C$ Stdev (‰) |
| Extant             | Artiodactyla | Antilocapridae | <i>Antilocapra</i>    | <i>americana</i>               | Pronghorn                                        | browser               | 46.1           | 4.66             | 9           | 58.3                    | 24.1                     | 2                                              | 2          | -18.9                            | 0.3                               | 6.7                     | 0.4                           | 0        | n/a                                 | n/a                                  | 11     | 52.1                    | 17.9                     | 27                                         | 18         | -19.1                            | 1.5                               | 6.5                     | 1                        | 8        | -18.9    | 2.1                                 |                                      |
| Extinct            | Artiodactyla | Antilocapridae | <i>Cynomeryx</i>      | <i>minor</i>                   | Dwarf pronghorn                                  | browser               | 15             | 4.18             | 7           | 18.5                    | 8.7                      | 2                                              | 0          | bdl                              | n/a                               | bdl                     | n/a                           | 1        | -20.7                               | n/a                                  | n/a    | n/a                     | n/a                      | 0                                          | 0          | n/a                              | n/a                               | n/a                     | n/a                      | 0        | n/a      | n/a                                 |                                      |
| Extinct            | Artiodactyla | Antilocapridae | <i>Stockoceros</i>    | <i>sp.</i>                     | Four-horned pronghorn                            | browser               | 53             | 4.72             | 0           | n/a                     | n/a                      | 0                                              | 0          | n/a                              | n/a                               | n/a                     | n/a                           | 0        | n/a                                 | n/a                                  | n/a    | n/a                     | n/a                      | 0                                          | 0          | n/a                              | n/a                               | n/a                     | n/a                      | 0        | n/a      | n/a                                 |                                      |
| Extinct            | Artiodactyla | Antilocapridae | <i>Tetrameryx</i>     | <i>shuleri</i>                 | Four-horned pronghorn                            | browser               | 60             | 4.78             | 9           | 116.9                   | 43.8                     | 1                                              | 1          | -18.1                            | n/a                               | 5.2                     | n/a                           | 0        | n/a                                 | n/a                                  | n/a    | n/a                     | n/a                      | 0                                          | 0          | n/a                              | n/a                               | n/a                     | n/a                      | 0        | n/a      | n/a                                 |                                      |
| Extinct            | Artiodactyla | Bovidae        | <i>Bison</i>          | <i>antiquus</i>                | Ancient bison                                    | grazer                | 802            | 5.90             | 65          | 778.5                   | 281.0                    | 13                                             | 2          | -10.8                            | 2.1                               | 8.7                     | 2.4                           | 9        | -9.1                                | 1.4                                  | n/a    | n/a                     | n/a                      | 0                                          | 0          | n/a                              | n/a                               | n/a                     | n/a                      | 0        | n/a      | n/a                                 |                                      |
| Extant             | Artiodactyla | Bovidae        | <i>Bison</i>          | <i>bison</i>                   | Bison                                            | grazer                | 579            | 5.76             | n/a         | n/a                     | n/a                      | 0                                              | 0          | n/a                              | n/a                               | n/a                     | n/a                           | n/a      | n/a                                 | n/a                                  | 66     | 476.7                   | 212.0                    | 50                                         | 31         | -10.3                            | 1.4                               | 6.1                     | 0.7                      | 18       | -9.8     | 1.8                                 |                                      |
| Extinct            | Artiodactyla | Bovidae        | <i>Bison</i>          | <i>latifrons</i>               | Long-horned bison                                | grazer                | 900            | 5.95             | 18          | 1292.8                  | 526.8                    | 2                                              | 0          | bdl                              | n/a                               | bdl                     | n/a                           | 1        | -8.5                                | n/a                                  | n/a    | n/a                     | n/a                      | 0                                          | 0          | n/a                              | n/a                               | n/a                     | n/a                      | 0        | n/a      | n/a                                 |                                      |
| Extinct            | Artiodactyla | Bovidae        | <i>Bison</i>          | <i>sp.</i>                     | either <i>B. latifrons</i> or <i>B. antiquus</i> | grazer                | 851            | 5.93             | 253         | 860.6                   | 320.1                    | 54                                             | 18         | -11.1                            | 2.1                               | 8.4                     | 1.6                           | 31       | 10.4                                | 2.1                                  | n/a    | n/a                     | n/a                      | 0                                          | 0          | n/a                              | n/a                               | n/a                     | n/a                      | 0        | n/a      | n/a                                 |                                      |
| Extinct            | Artiodactyla | Bovidae        | <i>Bootherium</i>     | <i>bombifrons</i> <sup>1</sup> | Woodland muskox                                  | mixed feeder          | 423            | 5.63             | 0           | n/a                     | n/a                      | 0                                              | 0          | n/a                              | n/a                               | n/a                     | n/a                           | 0        | n/a                                 | n/a                                  | n/a    | n/a                     | n/a                      | 0                                          | 0          | n/a                              | n/a                               | n/a                     | n/a                      | 0        | n/a      | n/a                                 |                                      |
| Extinct            | Artiodactyla | Camelidae      | <i>Camelops</i>       | <i>hesternus</i>               | Yesterday's camel                                | mixed feeder          | 1100           | 6.04             | 38          | 1158.9                  | 427.1                    | 36                                             | 0          | bdl                              | n/a                               | bdl                     | n/a                           | 31       | -16.1                               | 4.6                                  | n/a    | n/a                     | n/a                      | 0                                          | 0          | n/a                              | n/a                               | n/a                     | n/a                      | 0        | n/a      | n/a                                 |                                      |
| Extinct            | Artiodactyla | Camelidae      | <i>Hemiauchenia</i>   | <i>macrocephala</i>            | Large-headed llama                               | mixed feeder          | 110            | 5.04             | 2           | 372.9                   | 93.8                     | 2                                              | 0          | bdl                              | n/a                               | bdl                     | n/a                           | 0        | n/a                                 | n/a                                  | n/a    | n/a                     | n/a                      | 0                                          | 0          | n/a                              | n/a                               | n/a                     | n/a                      | 0        | n/a      | n/a                                 |                                      |
| Extinct            | Artiodactyla | Camelidae      | <i>Palaeolama</i>     | <i>mirifica</i>                | Stout-legged llama                               | mixed feeder          | 223            | 5.35             | 33          | 253.4                   | 67.4                     | 17                                             | 0          | bdl                              | n/a                               | bdl                     | n/a                           | 15       | -20.2                               | 0.9                                  | n/a    | n/a                     | n/a                      | 0                                          | 0          | n/a                              | n/a                               | n/a                     | n/a                      | 0        | n/a      | n/a                                 |                                      |
| Extinct            | Artiodactyla | Cervidae       | <i>Navahoceros</i>    | <i>fricki</i>                  | American mountain deer                           | browser               | 250            | 5.40             | 1           | 161.3                   | NA                       | 1                                              | 0          | n/a                              | n/a                               | n/a                     | n/a                           | 1        | -18.3                               | n/a                                  | n/a    | n/a                     | n/a                      | 0                                          | 0          | n/a                              | n/a                               | n/a                     | n/a                      | 0        | n/a      | n/a                                 |                                      |
| Extant             | Artiodactyla | Cervidae       | <i>Odocoileus</i>     | <i>sp.</i>                     | Deer                                             | browser               | 55             | 4.74             | 46          | 61.4                    | 18.5                     | 25                                             | 12         | -19.2                            | 0.8                               | 7.1                     | 2                             | 10       | -20.9                               | 0.7                                  | 123    | 73.4                    | 31.8                     | 69                                         | 57         | -19.1                            | 1.3                               | 6.5                     | 1                        | 7        | -20.2    | 1.8                                 |                                      |
| Extinct            | Artiodactyla | Tayassuidae    | <i>Mylohyus</i>       | <i>nasutus</i>                 | Long-nosed peccary                               | Browser               | 75             | 4.88             | 15          | 72.2                    | 29.8                     | 0                                              | 0          | n/a                              | n/a                               | n/a                     | n/a                           | 0        | n/a                                 | n/a                                  | n/a    | n/a                     | n/a                      | 0                                          | 0          | n/a                              | n/a                               | n/a                     | n/a                      | 0        | n/a      | n/a                                 |                                      |
| Extant             | Artiodactyla | Tayassuidae    | <i>Pecari</i>         | <i>tajacu</i>                  | Collared peccary                                 | mixed feeder          | 21.3           | 4.33             | 2           | 31.2                    | 0.6                      | 2                                              | 2          | -16.1                            | 0.5                               | 7.2                     | 0.2                           | 0        | n/a                                 | n/a                                  | 0      | n/a                     | n/a                      | 2                                          | 2          | -16.5                            | 0.1                               | 6.4                     | 0.5                      | 0        | n/a      | n/a                                 |                                      |
| Extinct            | Artiodactyla | Tayassuidae    | <i>Platygonus</i>     | <i>compressus</i>              | Flat-headed peccary                              | browser               | 136            | 5.13             | 18          | 81.6                    | 23.8                     | 5                                              | 0          | bdl                              | n/a                               | bdl                     | n/a                           | 4        | -17.7                               | 0.2                                  | n/a    | n/a                     | n/a                      | 0                                          | 0          | n/a                              | n/a                               | n/a                     | n/a                      | 0        | n/a      | n/a                                 |                                      |
| Extinct            | Carnivora    | Canidae        | <i>Canis</i>          | <i>dirus</i>                   | Dire wolf                                        | carnivore             | 65.0           | 4.81             | 51          | 55.2                    | 18.3                     | 16                                             | 5          | -11.7                            | 0.9                               | 12.7                    | 0.8                           | 3        | -10.4                               | 1.1                                  | n/a    | n/a                     | n/a                      | 0                                          | 0          | n/a                              | n/a                               | n/a                     | n/a                      | 0        | n/a      | n/a                                 |                                      |
| Extant             | Carnivora    | Canidae        | <i>Canis</i>          | <i>familiaris</i>              | domestic dog                                     | carnivore             | n/a            | 4                | 11.5        | 4.2                     | 0                        | 0                                              | n/a        | n/a                              | n/a                               | n/a                     | 0                             | n/a      | n/a                                 | 16                                   | 8.4    | 1.9                     | 5                        | 4                                          | -17.4      | 2.2                              | 8.4                               | 0.5                     | 0                        | n/a      | n/a      |                                     |                                      |
| Extant             | Carnivora    | Canidae        | <i>Canis</i>          | <i>latrans</i>                 | coyote                                           | carnivore             | 13.4           | 4.13             | 68          | 10.4                    | 3.4                      | 10                                             | 5          | -14.9                            | 1.9                               | 9.6                     | 1.6                           | 0        | n/a                                 | n/a                                  | 29     | 9.6                     | 3.2                      | 23                                         | 23         | -13.5                            | 2.7                               | 9.4                     | 1.8                      | 0        | n/a      | n/a                                 | Modern N=63, Mean=12.0               |
| Extant             | Carnivora    | Canidae        | <i>Canis</i>          | <i>latrans/familiaris</i>      | coyote or dog                                    | carnivore             | 15.0           | 4.18             | 30          | 9.1                     | 2.0                      | 0                                              | 0          | n/a                              | n/a                               | n/a                     | n/a                           | 0        | n/a                                 | n/a                                  | 20     | 9.5                     | 2.8                      | 12                                         | 11         | -15.7                            | 2.4                               | 9                       | 1.2                      | 0        | n/a      | n/a                                 |                                      |
| Extant             | Carnivora    | Canidae        | <i>Canis</i>          | <i>lupus</i>                   | Wolf                                             | carnivore             | 19.9           | 4.30             | 15          | 29.3                    | 8.1                      | 3                                              | 3          | -13.3                            | 2.8                               | 11.8                    | 1.4                           | 0        | n/a                                 | n/a                                  | 10     | 28.0                    | 6.3                      | 8                                          | 8          | -11.5                            | 3.8                               | 9.8                     | 1.9                      | 0        | n/a      | n/a                                 | Modern N=29, Mean=21.7+3.2           |
| Extant/<br>Extinct | Carnivora    | Canidae        | <i>Canis</i>          | <i>sp.</i>                     | wolf, coyote or dog                              | carnivore             | 11.4           | 4.06             | 1           | 7.2                     | n/a                      | 3                                              | 3          | -15.5                            | 3.5                               | 8.8                     | 3.7                           | 0        | n/a                                 | n/a                                  | 3      | 6.0                     | 0.2                      | 22                                         | 19         | -14.4                            | 1.9                               | 9.1                     | 1.7                      | 0        | n/a      | n/a                                 |                                      |
| Extant             | Carnivora    | Canidae        | <i>Urocyon</i>        | <i>cinereoargenteus</i>        | Grey fox                                         | carnivore             | 3.8            | 3.58             | 9           | 3.0                     | 1.1                      | 1                                              | 0          | bdl                              | n/a                               | bdl                     | n/a                           | 0        | n/a                                 | n/a                                  | 0      | n/a                     | n/a                      | 1                                          | 0          | bdl                              | n/a                               | bdl                     | n/a                      | 0        | n/a      | n/a                                 | Modern N=15, Mean=2.5+0.33           |
| Extant             | Carnivora    | Canidae        | <i>Urocyon/Vulpes</i> | <i>sp.</i>                     | Grey or red fox                                  | carnivore             | 3.3            | 3.52             | 6           | 3.0                     | 0.7                      | 2                                              | 2          | -15.9                            | 0.4                               | 10.1                    | 0.3                           | 0        | n/a                                 | n/a                                  | 2      | 4.0                     | 0.9                      | 0                                          | 0          | n/a                              | n/a                               | n/a                     | n/a                      | 0        | n/a      | n/a                                 |                                      |
| Extant             | Carnivora    | Canidae        | <i>Vulpes</i>         | <i>sp.</i>                     | swift, kit or red fox                            | carnivore             | 2.8            | 3.45             | 19          | 2.6                     | 0.8                      | 3                                              | 0          | bdl                              | n/a                               | bdl                     | n/a                           | 0        | n/a                                 | n/a                                  | 6      | 2.7                     | 1.4                      | 2                                          | 1          | -14.4                            | n/a                               | 11.7                    | n/a                      | 0        | n/a      | n/a                                 | Modern: v. macrotis, N=18, Mean      |



Table S2. Morphology measurements for fossils

| Order               | Family                | Genus                    | species           | Locality ID (TMM) | TMM ID       | Site Name            | County (all in TX, unless specified) |                    |                        | Element    | Description                          | R or L?  | Diameter (cm) | Circumference (cm) | Length (cm) | Width (cm) | Height (cm)  | Body mass (kg)                                                                       | Body mass equation employed | R <sup>2</sup> | %PE                                                              | Source for body mass equation |
|---------------------|-----------------------|--------------------------|-------------------|-------------------|--------------|----------------------|--------------------------------------|--------------------|------------------------|------------|--------------------------------------|----------|---------------|--------------------|-------------|------------|--------------|--------------------------------------------------------------------------------------|-----------------------------|----------------|------------------------------------------------------------------|-------------------------------|
|                     |                       |                          |                   |                   |              |                      | Age                                  | Source             | Element                |            |                                      |          |               |                    |             |            |              |                                                                                      |                             |                |                                                                  |                               |
| Artiodactyla        | Antilocapridae        | <i>Antilocapra</i>       | <i>americana</i>  | 4541              | 221          | Starvout Cave        | Carson                               | Holocene           | Present study          | LM3        | length of third lower molar          | R        | 1.53          | 0.58               |             |            | 20.9         | Log (Body mass, g) = 3.35*Log (LM3, mm) + 0.35                                       | 0.93                        | 47.2           | selendoots browsers, Table 16.9; Damuth and MacFadden            |                               |
| Artiodactyla        | Antilocapridae        | <i>Antilocapra</i>       | <i>americana</i>  | 41196/41493/1     | 4-4          | Brazos river         | Brazos                               | Pleistocene        | Present study          | LM2        | length of third lower molar          | L        | 1.59          | 0.83               |             |            | 23.5         | Log (Body mass, g) = 3.35*Log (LM3, mm) + 0.35                                       | 0.93                        | 47.2           | selendoots browsers, Table 16.9; Damuth and MacFadden            |                               |
| Artiodactyla        | Antilocapridae        | <i>Antilocapra</i>       | <i>americana</i>  | 892               | 4-4          | Lubbock Lake         | Lubbock                              | Pleistocene        | Present study          | UM2        | length of second upper molar         | R        | 1.25          | 0.73               |             |            | 24.8         | Log (Body mass, g) = 3.34*Log (UM2, mm) +0.73                                        | 0.94                        | 39.9           | Selendoot browsers, Table 16.9; Damuth and MacFadden 1990        |                               |
| Artiodactyla        | Antilocapridae        | <i>Antilocapra</i>       | <i>americana</i>  | 4541              | 101          | Starvout Cave        | Carson                               | Holocene           | Present study          | LP4        | length of fourth lower premolar      | L        | 1.03          | 0.65               |             |            | 28.2         | Log (Body mass, g) = 3.11*Log (LP4, mm) + 1.3                                        | 0.90                        | 57.0           | Selendoot browsers, Table 16.9; Damuth and MacFadden 1990        |                               |
| Artiodactyla        | Antilocapridae        | <i>Antilocapra</i>       | <i>americana</i>  | 4541              | 1229         | Starvout Cave        | Carson                               | Holocene           | Present study          | LP4        | length of fourth lower premolar      | R        | 1.13          | 0.65               |             |            | 37.8         | Log (Body mass, g) = 3.11*Log (LP4, mm) + 1.3                                        | 0.90                        | 57.0           | Selendoot browsers, Table 16.9; Damuth and MacFadden 1990        |                               |
| Artiodactyla        | Antilocapridae        | <i>Antilocapra</i>       | <i>americana</i>  | 908               | 3829         | Kincaid Shelter      | Uvalde                               | Holocene           | Present study          | TIB        | distal end; breadth of tibia         | L        | 2.96          | 2.32               |             |            | 43.9         | Log (Body mass, kg) = 2.848*Log (TIB, cm) + 0.3                                      | 0.95                        | 23.0           | Cervids, Table 16.7; Damuth and MacFadden 1990                   |                               |
| Artiodactyla        | Antilocapridae        | <i>Antilocapra</i>       | <i>americana</i>  | 892               | 4-4          | Lubbock Lake         | Lubbock                              | Pleistocene        | Present study          | M1         | length of first lower or upper molar | R        | 1.31          | 0.65               |             |            | 47.5         | Log (Body mass, g) = average[3.21*Log(LM1, mm)+1.12, 3.21*Log(LM1) + 1.07]           | 0.90                        | 38.7           | Selendoot browsers, Table 16.9; Damuth and MacFadden 1990        |                               |
| Artiodactyla        | Antilocapridae        | <i>Antilocapra</i>       | <i>americana</i>  | 4541              | 110          | Starvout Cave        | Carson                               | Holocene           | Present study          | LP3        | length of third lower premolar       | L        | 1.18          | 0.64               |             |            | 53.6         | Log (Body mass, g) = 3.19*Log (LP3, mm) + 1.31                                       | 0.84                        | 80.0           | Selendoot browser, Table 16.9; Damuth and MacFadden 1990         |                               |
| Artiodactyla        | Antilocapridae        | <i>Antilocapra</i>       | <i>americana</i>  | 39839             | 46           | Morhiss Mound        | Victoria                             | Pleistocene        | Present study          | ASA        | cross-sectional area of astragalus   | L        | 3.37          | 1.94               |             |            | 96.3         | Log (Body mass, g) = 1.465*Log (ASA, mm) + 0.633                                     | 0.98                        | 33.4           | all terrestrial mammals, Table 1; Tsuhamoto 2014                 |                               |
| Artiodactyla        | Antilocapridae        | <i>Antilocapra</i>       | <i>americana</i>  | 892               | 4-4          | Lubbock Lake         | Lubbock                              | Pleistocene        | Present study          | LM3        | length of third lower molar          | R        | 2.07          | 0.69               |             |            | 57.7         | Log (Body mass, g) = 3.35*Log (LM3, mm) + 0.35                                       | 0.93                        | 47.2           | selendoots browsers, Table 16.9; Damuth and MacFadden            |                               |
| Artiodactyla        | Antilocapridae        | <i>Antilocapra</i>       | <i>americana</i>  | 908               | 4189         | Kincaid Shelter      | Uvalde                               | Holocene           | Present study          | ASA        | cross-sectional area of astragalus   | L        | 3.49          | 1.92               |             |            | 58.6         | Log (Body mass, g) = 1.465*Log (ASA, mm) + 0.633                                     | 0.98                        | 33.4           | all terrestrial mammals, Table 1; Tsuhamoto 2014                 |                               |
| Artiodactyla        | Antilocapridae        | <i>Antilocapra</i>       | <i>americana</i>  | 4541              | 1232         | Starvout Cave        | Carson                               | Holocene           | Present study          | UM1        | length of first upper molar          | L        | 1.42          | 0.96               |             |            | 59.3         | Log (Body mass, g) = 3.21*Log (UM1, mm) + 1.07                                       | 0.96                        | 35.1           | Selendoot browsers, Table 16.9; Damuth and MacFadden 1990        |                               |
| Artiodactyla        | Antilocapridae        | <i>Antilocapra</i>       | <i>americana</i>  | 4541              | 1233         | Starvout Cave        | Carson                               | Holocene           | Present study          | UM1        | length of first upper molar          | R        | 1.43          | 1.12               |             |            | 59.4         | Log (Body mass, g) = 3.21*Log (UM1, mm) + 1.07                                       | 0.96                        | 35.1           | Selendoot browsers, Table 16.9; Damuth and MacFadden 1990        |                               |
| Artiodactyla        | Antilocapridae        | <i>Antilocapra</i>       | <i>americana</i>  | 908               | 4187         | Kincaid Shelter      | Uvalde                               | Holocene           | Present study          | ASA        | cross-sectional area of astragalus   | L        | 3.44          | 2.03               |             |            | 62.1         | Log (Body mass, g) = 1.465*Log (ASA, mm) + 0.633                                     | 0.98                        | 33.4           | all terrestrial mammals, Table 1; Tsuhamoto 2014                 |                               |
| Artiodactyla        | Antilocapridae        | <i>Antilocapra</i>       | <i>americana</i>  | 30839             | 27           | Morhiss Mound        | Victoria                             | Pleistocene        | Present study          | RA1        | length of radius                     | L        | 19.50         |                    |             |            | 66.2         | Log (Body mass, kg) = 3.0795*Log (RA1, mm) + 2.1515                                  | 0.85                        | 45.0           | Cervids, Table 16.7; Damuth and MacFadden 1990                   |                               |
| Artiodactyla        | Antilocapridae        | <i>Antilocapra</i>       | <i>americana</i>  | 908               | 4188         | Kincaid Shelter      | Uvalde                               | Holocene           | Present study          | ASA        | cross-sectional area of astragalus   | L        | 3.48          | 2.11               |             |            | 66.9         | Log (Body mass, g) = 1.465*Log (ASA, mm) + 0.633                                     | 0.98                        | 33.4           | all terrestrial mammals, Table 1; Tsuhamoto 2014                 |                               |
| Artiodactyla        | Antilocapridae        | <i>Antilocapra</i>       | <i>americana</i>  | 908               | 40           | Scharbauer Ranch     | Midland                              | Pleistocene        | Present study          | LM3        | length of third lower molar          | R        | 2.20          | 0.70               |             |            | 70.4         | Log (Body mass, g) = 3.35*Log (LM3, mm) + 0.35                                       | 0.93                        | 47.2           | selendoots browsers, Table 16.9; Damuth and MacFadden            |                               |
| Artiodactyla        | Antilocapridae        | <i>Antilocapra</i>       | <i>americana</i>  | 4541              | 112          | Starvout Cave        | Carson                               | Pleistocene        | Present study          | LM3        | length of third lower molar          | R        | 2.30          | 0.74               |             |            | 81.7         | Log (Body mass, g) = 3.35*Log (LM3, mm) + 0.35                                       | 0.93                        | 47.2           | selendoots browsers, Table 16.9; Damuth and MacFadden            |                               |
| Artiodactyla        | Antilocapridae        | <i>Antilocapra</i>       | <i>americana</i>  | 4541              | 110          | Starvout Cave        | Carson                               | Holocene           | Present study          | LM1        | length of first lower molar          | R        | 1.52          | 0.83               |             |            | 82.5         | Log (Body mass, g) = 3.21*Log (LM1, mm) + 1.12                                       | 0.94                        | 46.4           | Selendoot browsers, Table 16.9; Damuth and MacFadden             |                               |
| Artiodactyla        | Antilocapridae        | <i>Antilocapra</i>       | <i>americana</i>  | 892               | 292          | Lubbock Lake         | Lubbock                              | Pleistocene        | Present study          | Mt         | distal end of metatarsal             | L        | 2.96          | 2.08               |             |            | 96.3         | Log (Body mass, kg) = 2.8912(MT2, cm) + 0.621                                        | 0.94                        | 24.0           | Artiodactyla, Table 16.7; Damuth and MacFadden 1990              |                               |
| Artiodactyla        | Antilocapridae        | <i>Antilocapra</i>       | <i>sp.</i>        | 31141             | 22           | Aransas River        | San Patricio                         | Pleistocene        | Present study          | LM1        | length of third lower molar          | L        | 1.92          | 0.95               |             |            | 44.3         | Log (Body mass, g) = 3.35*Log (LM3, mm) + 0.35                                       | 0.93                        | 47.2           | selendoots browsers, Table 16.9; Damuth and MacFadden            |                               |
| Artiodactyla        | Antilocapridae        | <i>Antilocapra</i>       | <i>sp.</i>        | 31141             | 34           | Aransas River        | San Patricio                         | Pleistocene        | Present study          | UM2        | length of second upper molar         | R        | 1.77          | 1.11               |             |            | 79.7         | Log (Body mass, g) = 3.35*Log (UM2, mm) +0.73                                        | 0.94                        | 39.9           | Selendoot browsers, Table 16.9; Damuth and MacFadden 1990        |                               |
| Artiodactyla        | Antilocapridae        | <i>Capromeryx</i>        | <i>minor</i>      | 31034             | 91           | O'Brian Ranch        | Bee                                  | Pleistocene        | Present study          | Ca1        | length of calcaneum                  | L        | 3.34          |                    |             |            | 62.7         | Ln (Body mass, g) = 2.969*Ln (Ca1, mm) - 1.611                                       | 0.94                        | 44.1           | Tsuhamoto 2019, Table 3, land mammals                            |                               |
| Artiodactyla        | Antilocapridae        | <i>Capromeryx</i>        | <i>minor</i>      | 31034             | 123          | O'Brian Ranch        | Bee                                  | Pleistocene        | Present study          | LM3        | length of third lower molar          | R        | 1.21          | 0.44               |             |            | 9.5          | Log (Body mass, g) = 3.35*Log (LM3, mm) + 0.35                                       | 0.93                        | 47.2           | selendoots browsers, Table 16.9; Damuth and MacFadden            |                               |
| Artiodactyla        | Antilocapridae        | <i>Capromeryx</i>        | <i>minor</i>      | 998               | 19           | Scharbauer Ranch     | Midland                              | Pleistocene        | Present study          | LM3        | length of third lower molar          | R        | 1.46          | 0.47               |             |            | 17.9         | Log (Body mass, g) = 3.35*Log (LM3, mm) + 0.35                                       | 0.93                        | 47.2           | selendoots browsers, Table 16.9; Damuth and MacFadden            |                               |
| Artiodactyla        | Antilocapridae        | <i>Capromeryx</i>        | <i>minor</i>      | 31034             | 95           | O'Brian Ranch        | Bee                                  | Pleistocene        | Present study          | LM3        | length of first lower molar          | L        | 1.86          | 0.73               |             |            | 18.5         | Log (Body mass, g) = 3.21*Log (LM1, mm) + 1.12                                       | 0.94                        | 46.4           | Selendoot browsers, Table 16.9; Damuth and MacFadden 1990        |                               |
| Artiodactyla        | Antilocapridae        | <i>Capromeryx</i>        | <i>minor</i>      | 30967             | 1323         | Ingleside            | San Patricio                         | Pleistocene        | Present study          | LM3        | length of third lower molar          | L        | 0.90          | 0.73               |             |            | 18.5         | Log (Body mass, g) = 3.35*Log (LM3, mm) + 0.35                                       | 0.93                        | 47.2           | selendoots browsers, Table 16.9; Damuth and MacFadden 1990       |                               |
| Artiodactyla        | Antilocapridae        | <i>Capromeryx</i>        | <i>minor</i>      | 998               | 137          | Scharbauer Ranch     | Midland                              | Pleistocene        | Present study          | Tp         | distal end of metapodial             | L        | 1.92          | 1.18               |             |            | 25.1         | Log (Body mass, kg) = average[2.6115*Log (M2, cm) + 0.6185, 2.8912(MT2, cm) + 0.621] | >0.94                       | 24.0           | Artiodactyla, Table 16.7; Damuth and MacFadden 1990              |                               |
| Artiodactyla        | Antilocapridae        | <i>Capromeryx</i>        | <i>minor</i>      | 998               | 195          | Scharbauer Ranch     | Midland                              | Pleistocene        | Present study          | Mt         | distal end of metatarsal             | L        | 2.03          | 1.41               |             |            | 32.4         | Log (Body mass, kg) = 2.8912(MT2, cm) + 0.621                                        | >0.94                       | 24.0           | Artiodactyla, Table 16.7; Damuth and MacFadden 1990              |                               |
| Artiodactyla        | Antilocapridae        | <i>no ID - antelope?</i> | <i>sp.</i>        | 892               | 6-6c         | Lubbock Lake         | Lubbock                              | Pleistocene        | Present study          | Mt         | distal end of metatarsal             | L        | 2.70          | 2.02               |             |            | 73.8         | Log (Body mass, kg) = 2.8912(MT2, cm) + 0.621                                        | 0.94                        | 24.0           | Artiodactyla, Table 16.7; Damuth and MacFadden 1990              |                               |
| Artiodactyla        | Antilocapridae        | <i>Tetrameryx</i>        | <i>sp.</i>        | 31034             | 108          | O'Brian Ranch        | Bee                                  | Pleistocene        | Present study          | LM3        | length of third lower molar          | L        | 2.43          | 1.23               |             |            | 98.5         | Log (Body mass, g) = 3.35*Log (LM3, mm) + 0.35                                       | 0.93                        | 47.2           | selendoots browsers, Table 16.9; Damuth and MacFadden            |                               |
| <b>Artiodactyla</b> | <b>Antilocapridae</b> | <b><i>Tetrameryx</i></b> | <b><i>sp.</i></b> | <b>31034</b>      | <b>40</b>    | <b>O'Brian Ranch</b> | <b>Bee</b>                           | <b>Pleistocene</b> | <b>Present study</b>   | <b>LM3</b> | <b>length of third lower molar</b>   | <b>R</b> | <b>3.00</b>   | <b>0.93</b>        |             |            | <b>198.8</b> | <b>Log (Body mass, g) = 3.35*Log (LM3, mm) + 0.35</b>                                | <b>0.93</b>                 | <b>47.2</b>    | <b>selendoots browsers, Table 16.9; Damuth and MacFadden</b>     |                               |
| Artiodactyla        | Antilocapridae        | <i>Tetrameryx</i>        | <i>sp.</i>        | 30839             | 39           | Morhiss Mound        | Victoria                             | Pleistocene        | Present study          | horn core  | horn core, proximal end              | R        | 4.57          | 2.18               |             |            |              |                                                                                      |                             |                |                                                                  |                               |
| Artiodactyla        | Antilocapridae        | <i>Tetrameryx</i>        | <i>(t)</i>        | 892               | -999         | Lubbock Lake         | Lubbock                              | Pleistocene        | Present study          | Mt         | distal end of metatarsal             | L        | 2.95          | 2.00               |             |            | 95.4         | Log (Body mass, kg) = 2.8912(MT2, cm) + 0.621                                        | 0.94                        | 24.0           | Artiodactyla, Table 16.7; Damuth and MacFadden 1990              |                               |
| Artiodactyla        | Antilocapridae        | <i>Tetrameryx</i>        | <i>(t)</i>        | 43407             | 39           | Honey Creek Cave     | Mason                                | Pleistocene        | Present study          | LM1 or LM2 | length of second lower molar         | L        | 1.78          | 0.85               |             |            | 96.9         | Log (Body mass, g) = average[3.21*Log (LM1, mm) + 1.12, 3.41*Log (LM2) + 0.72]       | 0.94                        | 40.0           | Selendoot browsers, Table 16.9; Damuth and MacFadden 1990        |                               |
| Artiodactyla        | Antilocapridae        | <i>Tetrameryx</i>        | <i>(t)</i>        | 892               | -999         | Lubbock Lake         | Lubbock                              | Pleistocene        | Present study          | Mt         | distal end of metatarsal             | L        | 3.00          | 2.03               |             |            | 100.1        | Log (Body mass, kg) = 2.8912(MT2, cm) + 0.621                                        | 0.94                        | 24.0           | Artiodactyla, Table 16.7; Damuth and MacFadden 1990              |                               |
| Artiodactyla        | Antilocapridae        | <i>Tetrameryx</i>        | <i>(t)</i>        | 892               | -999         | Lubbock Lake         | Lubbock                              | Pleistocene        | Present study          | Mt         | distal end of metatarsal             | L        | 3.00          | 2.06               |             |            | 100.1        | Log (Body mass, kg) = 2.8912(MT2, cm) + 0.621                                        | 0.94                        | 24.0           | Artiodactyla, Table 16.7; Damuth and MacFadden 1990              |                               |
| Artiodactyla        | Antilocapridae        | <i>Tetrameryx</i>        | <i>(t)</i>        | 43407             | 38           | Honey Creek Cave     | Mason                                | Pleistocene        | Present study          | LM3        | length of third lower molar          | R        | 2.76          | 1.77               |             |            | 150.1        | Log (Body mass, g) = 3.35*Log (LM3, mm) + 0.35                                       | 0.93                        | 47.2           | selendoots browsers, Table 16.9; Damuth and MacFadden            |                               |
| Artiodactyla        | Antilocapridae        | <i>Tetrameryx</i>        | <i>(t)</i>        | 30839             | 47           | Morhiss Mound        | Victoria                             | Pleistocene        | Present study          | UM3        | length of third upper molar          | R        | 2.18          | 1.12               |             |            | 158.8        | Log (Body mass, g) = 3.29*Log (UM3, mm) + 0.8                                        | 0.93                        | 44.7           | Selendoot browsers, Table 16.9; Damuth and MacFadden 1990        |                               |
| <b>Artiodactyla</b> | <b>Antilocapridae</b> | <b><i>Tetrameryx</i></b> | <b><i>sp.</i></b> | <b>30967</b>      | <b>1035A</b> | <b>Ingleside</b>     | <b>San Patricio</b>                  | <b>Pleistocene</b> | <b>Lundelius 1972b</b> | <b>UM1</b> | <b>length of first upper molar</b>   | <b>R</b> | <b>1.58</b>   |                    |             |            | <b>53.6</b>  | <b>Log (Body mass, g) = 3.21*Log (UM1, mm) + 1.07</b>                                | <b>0.96</b>                 | <b>35.1</b>    | <b>Selendoot browsers, Table 16.9; Damuth and MacFadden 1990</b> |                               |
| Artiodactyla        | Bovidae               | <i>Rison</i>             | <i>antiquus</i>   | 892               | 3E           | Lubbock Lake         | Lubbock                              | Pleistocene        | Johnson 1976           | TIL        | length of tibia                      | L        | 34.40         |                    |             |            | 206.14       | Log (Body mass, kg) = 3.9842*Log (TIL, cm) -3.8078                                   | 0.85                        | 46.0           | Bovids, Table 16.7; Damuth and MacFadden 1990                    |                               |
| Artiodactyla        | Bovidae               | <i>Rison</i>             | <i>antiquus</i>   | 892               | 3E-Y         | Lubbock Lake         | Lubbock                              | Pleistocene        | Johnson 1976           | TIL        | length of tibia                      | L        | 35.20         |                    |             |            | 225.91       | Log (Body mass, kg) = 3.9842*Log (TIL, cm) -3.8078                                   | 0.85                        | 46.0           | Bovids, Table 16.7; Damuth and MacFadden 1990                    |                               |
| Artiodactyla        | Bovidae               | <i>Rison</i>             | <i>antiquus</i>   | 892               | 3E           | Lubbock Lake         | Lubbock                              | Pleistocene        | Johnson 1976           | TIL        | length of tibia                      | L        | 38.50         |                    |             |            | 322.84       | Log (Body mass, kg) = 3.9842*Log (TIL, cm) -3.8078                                   | 0.85                        | 46.0           | Bovids, Table 16.7; Damuth and MacFadden 1990                    |                               |
| Artiodactyla        | Bovidae               | <i>Rison</i>             | <i>antiquus</i>   | 892               | 3E           | Lubbock Lake         | Lubbock                              | Pleistocene        | Johnson 1976           | TIL        | length of tibia                      | L        | 38.70         |                    |             |            | 329.58       | Log (Body mass, kg) = 3.9842*Log (TIL, cm) -3.8078                                   | 0.85                        | 46.0           | Bovids, Table 16.7; Damuth and MacFadden 1990                    |                               |
| Artiodactyla        | Bovidae               | <i>Rison</i>             | <i>antiquus</i>   | 892               | TTU-A-1702   | Lubbock Lake         | Lubbock                              | Pleistocene        | Johnson 1976           | As1        | length of astragalus                 | L        | 8.30          |                    |             |            | 342.07       | Log (Body mass, g) = 3.125*Log (As1, mm) -0.463                                      | 0.97                        | 47.5           | all terrestrial mammals, Table 1; Tsuhamoto 2014                 |                               |
| Artiodactyla        | Bovidae               | <i>Rison</i>             | <i>antiquus</i>   | 892               | 3E           | Lubbock Lake         | Lubbock                              | Pleistocene        | Johnson 1976           | TIL        | length of tibia                      | L        | 39.70         |                    |             |            | 364.84       | Log (Body mass, kg) = 3.9842*Log (TIL, cm) -3.8078                                   | 0.85                        | 46.0           | Bovids, Table 16.7; Damuth and MacFadden 1990                    |                               |
| Artiodactyla        | Bovidae               | <i>Rison</i>             | <i>antiquus</i>   | 892               | TTU-A-2578   | Lubbock Lake         | Lubbock                              | Pleistocene        | Johnson 1976           | As1        | length of astragalus                 | L        | 8.70          |                    |             |            | 396.28       | Log (Body mass, g) = 3.125*Log (As1, mm) -0.463                                      | 0.97                        | 47.5           | all terrestrial mammals, Table 1; Tsuhamoto 2014                 |                               |
| Artiodactyla        | Bovidae               | <i>Rison</i>             | <i>antiquus</i>   |                   |              |                      |                                      |                    |                        |            |                                      |          |               |                    |             |            |              |                                                                                      |                             |                |                                                                  |                               |





|              |         |              |     |       |                     |                          |                |             |               |            |                                       |      |      |        |                                                                                                                                                  |                                                                                                                                                          |      |                                               |                                                   |
|--------------|---------|--------------|-----|-------|---------------------|--------------------------|----------------|-------------|---------------|------------|---------------------------------------|------|------|--------|--------------------------------------------------------------------------------------------------------------------------------------------------|----------------------------------------------------------------------------------------------------------------------------------------------------------|------|-----------------------------------------------|---------------------------------------------------|
| Artiodactyla | Bovidae | <i>Rison</i> | sp. | 937   | 38                  | Blackwater Draw          | sovevel Co., N | Pleistocene | Present study | M1 or M2   | length of first or second molar       | 2.82 | 1.75 | 576.42 | $\log(\text{Body mass, kg}) = \text{average}[3.52(\log \text{LM1, cm}) + 1.372, 3.375(\log \text{LM2}) + 1.119, 3.395(\log \text{UM2}) + 1.061]$ | 0.91                                                                                                                                                     | 36.0 | Bovids, Tables 16.8, Damuth and McFadden 1990 |                                                   |
| Artiodactyla | Bovidae | <i>Rison</i> | sp. | 725   | n-numbered (256-33) | Plainview Quarry         | Hale           | Pleistocene | Present study | LM3        | length of third lower molar           | 4.21 | 1.45 | 584.13 | $\log(\text{Body mass, kg}) = 3.236^* \log(\text{LM3, cm}) + 0.746$                                                                              | 0.93                                                                                                                                                     | 33.3 | Bovids, Table 16.8, Damuth and McFadden 1991  |                                                   |
| Artiodactyla | Bovidae | <i>Rison</i> | sp. | 1018  | 3                   | Sitter Ranch             | Donley         | Pleistocene | Present study | LM3        | length of third lower molar           | 4.22 | 1.85 | 588.18 | $\log(\text{Body mass, kg}) = 3.236^* \log(\text{LM3, cm}) + 0.745$                                                                              | 0.93                                                                                                                                                     | 33.3 | Bovids, Table 16.8, Damuth and McFadden 1990  |                                                   |
| Artiodactyla | Bovidae | <i>Rison</i> | sp. | 1222  | 11                  | Oto Strokein Ranch       | Gillespie      | Pleistocene | Present study | LM3        | length of third lower molar           | R    | 4.24 | 1.85   | 594.06                                                                                                                                           | $\log(\text{Body mass, kg}) = 3.236^* \log(\text{LM3, cm}) + 0.745$                                                                                      | 0.93 | 33.3                                          | Bovids, Table 16.8, Damuth and McFadden 1990      |
| Artiodactyla | Bovidae | <i>Rison</i> | sp. | 892   | 77                  | Lubbock Lake             | Lubbock        | Pleistocene | Present study | LM2        | length of second upper molar          | L    | 3.23 | 2.82   | 616.23                                                                                                                                           | $\log(\text{Body mass, kg}) = 3.375^* (\log \text{LM2, cm}) + 1.061$                                                                                     | 0.91 | 36.5                                          | Bovids, Table 16.8, Damuth and McFadden 1990      |
| Artiodactyla | Bovidae | <i>Rison</i> | sp. | 40279 | 97                  | Longhorn Cave            | Burnet         | Pleistocene | Present study | ASA        | cross-sectional area of astragalus    |      | 4.39 | 1.90   | 636.27                                                                                                                                           | $\log(\text{Body mass, g}) = 1.465^* \log(\text{ASA, mm}) + 0.633$                                                                                       | 0.98 | 33.4                                          | all terrestrial mammals, Table 1: Tsabamoto 2014  |
| Artiodactyla | Bovidae | <i>Rison</i> | sp. | 43192 | 4                   | Hughes Ranch Indian Camp | n/a            | Pleistocene | Present study | LM3        | length of third lower molar           | R    | 4.34 | 1.90   | 641.13                                                                                                                                           | $\log(\text{Body mass, kg}) = 3.236^* \log(\text{LM3, cm}) + 0.745$                                                                                      | 0.93 | 33.3                                          | Bovids, Table 16.8, Damuth and McFadden 1990      |
| Artiodactyla | Bovidae | <i>Rison</i> | sp. | 908   | 831                 | Kincaid Shelter          | Uvalde         | Pleistocene | Present study | TIB        | distal end; breadth of tibia          |      | 7.51 | 5.55   | 645.40                                                                                                                                           | $\log(\text{Body mass, kg}) = 2.869^* (\log \text{TIB, cm}) + 0.322$                                                                                     | 0.95 | 20.0                                          | Bovids, Table 16.7, Damuth and McFadden 1990      |
| Artiodactyla | Bovidae | <i>Rison</i> | sp. | 725   | n-numbered (256-33) | Plainview Quarry         | Hale           | Pleistocene | Present study | LM3        | length of third lower molar           |      | 4.36 | 1.68   | 651.23                                                                                                                                           | $\log(\text{Body mass, kg}) = 3.236^* \log(\text{LM3, cm}) + 0.813$                                                                                      | 0.93 | 33.3                                          | Bovids, Table 16.8, Damuth and McFadden 2058      |
| Artiodactyla | Bovidae | <i>Rison</i> | sp. | 1018  | 6                   | Sitter Ranch             | Donley         | Pleistocene | Present study | LM3        | length of third lower molar           |      | 4.38 | 1.45   | 660.46                                                                                                                                           | $\log(\text{Body mass, kg}) = 3.236^* \log(\text{LM3, cm}) + 0.745$                                                                                      | 0.93 | 33.3                                          | Bovids, Table 16.8, Damuth and McFadden 1990      |
| Artiodactyla | Bovidae | <i>Rison</i> | sp. | 892   | unknown             | Lubbock Lake             | Lubbock        | Pleistocene | Present study | LM2        | length of second lower molar          | R    | 3.19 | 2.13   | 661.72                                                                                                                                           | $\log(\text{Body mass, kg}) = 3.375^* (\log \text{LM2, cm}) + 1.119$                                                                                     | 0.93 | 33.6                                          | Bovids, Table 16.8, Damuth and McFadden 1990      |
| Artiodactyla | Bovidae | <i>Rison</i> | sp. | 1018  | 2                   | Sitter Ranch             | Donley         | Pleistocene | Present study | LM3        | length of third lower molar           |      | 4.38 | 1.48   | 663.40                                                                                                                                           | $\log(\text{Body mass, kg}) = 3.236^* \log(\text{LM3, cm}) + 0.745$                                                                                      | 0.93 | 33.3                                          | Bovids, Table 16.8, Damuth and McFadden 1990      |
| Artiodactyla | Bovidae | <i>Rison</i> | sp. | 31141 | 49                  | Aransas River            | San Patricio   | Pleistocene | Present study | UM1        | length of first upper molar           | R    | 3.08 | 1.82   | 671.36                                                                                                                                           | $\log(\text{Body mass, g}) = 3.13^* \log(\text{UM1, mm}) + 1.17$                                                                                         | 0.90 | 39.8                                          | Selenodonts, Table 16.9, Damuth and McFadden 1990 |
| Artiodactyla | Bovidae | <i>Rison</i> | sp. | 725   | n-numbered (256-33) | Plainview Quarry         | Hale           | Pleistocene | Present study | LM3        | length of third lower molar           |      | 4.42 | 1.84   | 681.19                                                                                                                                           | $\log(\text{Body mass, kg}) = 3.236^* \log(\text{LM3, cm}) + 0.812$                                                                                      | 0.93 | 33.3                                          | Bovids, Table 16.8, Damuth and McFadden 2057      |
| Artiodactyla | Bovidae | <i>Rison</i> | sp. | 1018  | unknown             | Sitter Ranch             | Donley         | Pleistocene | Present study | LM3        | length of third lower molar           |      | 4.42 | 1.72   | 681.19                                                                                                                                           | $\log(\text{Body mass, kg}) = 3.236^* \log(\text{LM3, cm}) + 0.745$                                                                                      | 0.93 | 33.3                                          | Bovids, Table 16.8, Damuth and McFadden 1990      |
| Artiodactyla | Bovidae | <i>Rison</i> | sp. | 1018  | 5                   | Sitter Ranch             | Donley         | Pleistocene | Present study | LM3        | length of third lower molar           |      | 4.42 | 1.39   | 683.69                                                                                                                                           | $\log(\text{Body mass, kg}) = 3.236^* \log(\text{LM3, cm}) + 0.745$                                                                                      | 0.93 | 33.3                                          | Bovids, Table 16.8, Damuth and McFadden 1990      |
| Artiodactyla | Bovidae | <i>Rison</i> | sp. | 892   | unknown             | Lubbock Lake             | Lubbock        | Pleistocene | Present study | LM1        | length of first lower molar           | L    | 2.62 | 1.68   | 697.97                                                                                                                                           | $\log(\text{Body mass, kg}) = 3.520^* (\log \text{LM1, cm}) + 1.372$                                                                                     | 0.93 | 34.0                                          | Bovids, Table 16.8, Damuth and McFadden 1990      |
| Artiodactyla | Bovidae | <i>Rison</i> | sp. | 31034 | 14                  | O'Brain Ranch            | Bee            | Pleistocene | Present study | UM1        | length of first upper molar           | R    | 2.62 | 1.86   | 697.97                                                                                                                                           | $\log(\text{Body mass, kg}) = 3.520^* (\log \text{UM1, cm}) + 1.372$                                                                                     | 0.93 | 34.0                                          | Bovids, Table 16.8, Damuth and McFadden 1990      |
| Artiodactyla | Bovidae | <i>Rison</i> | sp. | 908   | 2454                | Kincaid Shelter          | Uvalde         | Pleistocene | Present study | UM1        | length of first upper molar           |      | 2.58 | 1.20   | 700.51                                                                                                                                           | $\log(\text{Body mass, g}) = \text{average}[3.13^* \log(\text{UM1, mm}) + 1.17, 3.15^* \log(\text{UM2, mm}) + 0.94, 3.12^* \log(\text{UM3, mm}) + 0.94]$ | 0.91 | 40.0                                          | Selenodonts, Table 16.9, Damuth and McFadden 1990 |
| Artiodactyla | Bovidae | <i>Rison</i> | sp. | 725   | n-numbered (256-33) | Plainview Quarry         | Hale           | Pleistocene | Present study | LM3        | length of third lower molar           |      | 4.48 | 1.59   | 712.09                                                                                                                                           | $\log(\text{Body mass, kg}) = 3.236^* \log(\text{LM3, cm}) + 0.811$                                                                                      | 0.93 | 33.3                                          | Bovids, Table 16.8, Damuth and McFadden 2056      |
| Artiodactyla | Bovidae | <i>Rison</i> | sp. | 892   | 258                 | Lubbock Lake             | Lubbock        | Pleistocene | Present study | LM3        | length of third lower molar           | L    | 4.51 | 1.59   | 729.73                                                                                                                                           | $\log(\text{Body mass, kg}) = 3.236^* \log(\text{LM3, cm}) + 0.745$                                                                                      | 0.93 | 33.3                                          | Bovids, Table 16.8, Damuth and McFadden 1990      |
| Artiodactyla | Bovidae | <i>Rison</i> | sp. | 725   | n-numbered (256-33) | Plainview Quarry         | Hale           | Pleistocene | Present study | LM3        | length of third lower molar           |      | 4.54 | 1.60   | 745.54                                                                                                                                           | $\log(\text{Body mass, kg}) = 3.236^* \log(\text{LM3, cm}) + 0.810$                                                                                      | 0.93 | 33.3                                          | Bovids, Table 16.8, Damuth and McFadden 2055      |
| Artiodactyla | Bovidae | <i>Rison</i> | sp. | 725   | n-numbered (256-33) | Plainview Quarry         | Hale           | Pleistocene | Present study | LM3        | length of third lower molar           |      | 4.55 | 1.60   | 747.66                                                                                                                                           | $\log(\text{Body mass, kg}) = 3.236^* \log(\text{LM3, cm}) + 0.808$                                                                                      | 0.93 | 33.3                                          | Bovids, Table 16.8, Damuth and McFadden 2053      |
| Artiodactyla | Bovidae | <i>Rison</i> | sp. | 892   | 2                   | Lubbock Lake             | Lubbock        | Pleistocene | Present study | LM3        | length of third lower molar           | L    | 4.55 | 1.93   | 750.33                                                                                                                                           | $\log(\text{Body mass, kg}) = 3.236^* \log(\text{LM3, cm}) + 0.745$                                                                                      | 0.93 | 33.3                                          | Bovids, Table 16.8, Damuth and McFadden 1990      |
| Artiodactyla | Bovidae | <i>Rison</i> | sp. | 725   | n-numbered (256-33) | Plainview Quarry         | Hale           | Pleistocene | Present study | LM3        | length of third lower molar           |      | 4.57 | 1.35   | 750.51                                                                                                                                           | $\log(\text{Body mass, kg}) = 3.236^* \log(\text{LM3, cm}) + 0.807$                                                                                      | 0.93 | 33.3                                          | Bovids, Table 16.8, Damuth and McFadden 2052      |
| Artiodactyla | Bovidae | <i>Rison</i> | sp. | 1018  | 71                  | Sitter Ranch             | Donley         | Pleistocene | Present study | LM3        | length of third lower molar           | R    | 2.69 | 1.67   | 756.88                                                                                                                                           | $\log(\text{Body mass, kg}) = 3.520^* (\log \text{LM1, cm}) + 1.372$                                                                                     | 0.93 | 34.0                                          | Bovids, Table 16.8, Damuth and McFadden 1990      |
| Artiodactyla | Bovidae | <i>Rison</i> | sp. | 1018  | 4                   | Sitter Ranch             | Donley         | Pleistocene | Present study | LM2        | length of third lower molar           |      | 4.28 | 1.45   | 756.36                                                                                                                                           | $\log(\text{Body mass, kg}) = 3.236^* \log(\text{LM2, cm}) + 0.745$                                                                                      | 0.93 | 33.3                                          | Bovids, Table 16.8, Damuth and McFadden 1990      |
| Artiodactyla | Bovidae | <i>Rison</i> | sp. | 892   | 474                 | Lubbock Lake             | Lubbock        | Pleistocene | Present study | LM2        | length of second lower molar          | L    | 3.34 | 1.40   | 768.72                                                                                                                                           | $\log(\text{Body mass, kg}) = 3.375^* (\log \text{LM2, cm}) + 1.119$                                                                                     | 0.93 | 33.6                                          | Bovids, Table 16.8, Damuth and McFadden 1990      |
| Artiodactyla | Bovidae | <i>Rison</i> | sp. | 725   | n-numbered (256-33) | Plainview Quarry         | Hale           | Pleistocene | Present study | LM3        | length of third lower molar           |      | 4.59 | 1.54   | 772.41                                                                                                                                           | $\log(\text{Body mass, kg}) = 3.236^* \log(\text{LM3, cm}) + 0.806$                                                                                      | 0.93 | 33.3                                          | Bovids, Table 16.8, Damuth and McFadden 2051      |
| Artiodactyla | Bovidae | <i>Rison</i> | sp. | 1018  | unknown             | Sitter Ranch             | Donley         | Pleistocene | Present study | M1         | length of first lower or upper molar  |      | 3.09 | 2.03   | 777.36                                                                                                                                           | $\log(\text{Body mass, g}) = \text{average}[3.13^* (\log \text{LM1, mm}) + 1.17, 3.2^* (\log \text{LM1, mm}) + 1.17]$                                    | 0.92 | 41.2                                          | Selenodonts, Table 16.9, Damuth and McFadden 1990 |
| Artiodactyla | Bovidae | <i>Rison</i> | sp. | 933   | 3403                | Frisenhahn cave          | Bezar          | Pleistocene | Present study | UM3        | length of third upper molar           | L    | 3.87 | 2.20   | 785.24                                                                                                                                           | $\log(\text{Body mass, g}) = 3.12^* \log(\text{UM3, mm}) + 0.94$                                                                                         | 0.90 | 39.4                                          | Selenodonts, Table 16.9, Damuth and McFadden 1990 |
| Artiodactyla | Bovidae | <i>Rison</i> | sp. | 725   | n-numbered (256-33) | Plainview Quarry         | Hale           | Pleistocene | Present study | LM3        | length of third lower molar           |      | 4.64 | 1.57   | 797.17                                                                                                                                           | $\log(\text{Body mass, kg}) = 3.236^* \log(\text{LM3, cm}) + 0.803$                                                                                      | 0.93 | 33.3                                          | Bovids, Table 16.8, Damuth and McFadden 2048      |
| Artiodactyla | Bovidae | <i>Rison</i> | sp. | 725   | n-numbered (256-33) | Plainview Quarry         | Hale           | Pleistocene | Present study | LM3        | length of third lower molar           |      | 4.66 | 1.64   | 807.78                                                                                                                                           | $\log(\text{Body mass, kg}) = 3.236^* \log(\text{LM3, cm}) + 0.802$                                                                                      | 0.93 | 33.3                                          | Bovids, Table 16.8, Damuth and McFadden 2047      |
| Artiodactyla | Bovidae | <i>Rison</i> | sp. | 725   | unknown             | Plainview Quarry         | Hale           | Pleistocene | Present study | LM1        | length of first or second lower molar |      | 2.74 | 1.81   | 813.00                                                                                                                                           | $\log(\text{Body mass, kg}) = 3.520^* (\log \text{LM1, cm}) + 1.372$                                                                                     | 0.93 | 34.0                                          | Bovids, Table 16.8, Damuth and McFadden 1990      |
| Artiodactyla | Bovidae | <i>Rison</i> | sp. | 892   | 348                 | Lubbock Lake             | Lubbock        | Pleistocene | Present study | M1 or M2   | length of first or second molar       |      | 3.13 | 1.45   | 821.99                                                                                                                                           | $\log(\text{Body mass, kg}) = \text{average}[3.52^* \log(\text{LM1, cm}) + 1.372, 3.375^* \log(\text{LM2}) + 1.119, 3.395^* \log(\text{UM2}) + 1.061]$   | 0.91 | 36.0                                          | Bovids, Table 16.8, Damuth and McFadden 1990      |
| Artiodactyla | Bovidae | <i>Rison</i> | sp. | 1018  | unknown             | Sitter Ranch             | Donley         | Pleistocene | Present study | M1         | length of first lower or upper molar  |      | 3.15 | 1.82   | 822.83                                                                                                                                           | $\log(\text{Body mass, g}) = \text{average}[3.13^* (\log \text{LM1, mm}) + 1.17, 3.2^* (\log \text{LM1, mm}) + 1.17]$                                    | 0.93 | 34.0                                          | Selenodonts, Table 16.9, Damuth and McFadden 1990 |
| Artiodactyla | Bovidae | <i>Rison</i> | sp. | 725   | n-numbered (256-33) | Plainview Quarry         | Hale           | Pleistocene | Present study | LM3        | length of third lower molar           |      | 4.69 | 1.57   | 827.59                                                                                                                                           | $\log(\text{Body mass, kg}) = 3.236^* \log(\text{LM3, cm}) + 0.800$                                                                                      | 0.93 | 33.3                                          | Bovids, Table 16.8, Damuth and McFadden 2045      |
| Artiodactyla | Bovidae | <i>Rison</i> | sp. | 40279 | 68                  | Longhorn Cave            | Burnet         | Pleistocene | Present study | UM1        | length of first upper molar           |      | 3.29 | 2.10   | 828.72                                                                                                                                           | $\log(\text{Body mass, g}) = 3.13^* \log(\text{UM1, mm}) + 1.17$                                                                                         | 0.90 | 39.8                                          | Selenodonts, Table 16.9, Damuth and McFadden 1990 |
| Artiodactyla | Bovidae | <i>Rison</i> | sp. | 725   | n-numbered (256-33) | Plainview Quarry         | Hale           | Pleistocene | Present study | LM3        | length of third lower molar           |      | 4.70 | 1.59   | 828.73                                                                                                                                           | $\log(\text{Body mass, kg}) = 3.236^* \log(\text{LM3, cm}) + 0.799$                                                                                      | 0.93 | 33.3                                          | Bovids, Table 16.8, Damuth and McFadden 2044      |
| Artiodactyla | Bovidae | <i>Rison</i> | sp. | 725   | n-numbered (256-33) | Plainview Quarry         | Hale           | Pleistocene | Present study | LM3        | length of third lower molar           |      | 4.71 | 1.53   | 837.33                                                                                                                                           | $\log(\text{Body mass, kg}) = 3.236^* \log(\text{LM3, cm}) + 0.797$                                                                                      | 0.93 | 33.3                                          | Bovids, Table 16.8, Damuth and McFadden 2042      |
| Artiodactyla | Bovidae | <i>Rison</i> | sp. | 908   | 855                 | Kincaid Shelter          | Uvalde         | Pleistocene | Present study | Mc         | distal end of metacarpal              | R    | 7.50 | 3.61   | 840.69                                                                                                                                           | $\log(\text{Body mass, kg}) = 2.6695^* \log(\text{MC2, cm}) + 0.610$                                                                                     | 0.95 | 20.0                                          | Bovids, Table 16.7, Damuth and McFadden 1990      |
| Artiodactyla | Bovidae | <i>Rison</i> | sp. | 725   | n-numbered (256-33) | Plainview Quarry         | Hale           | Pleistocene | Present study | LM3        | length of third lower molar           |      | 4.72 | 1.81   | 840.78                                                                                                                                           | $\log(\text{Body mass, kg}) = 3.236^* \log(\text{LM3, cm}) + 0.796$                                                                                      | 0.93 | 33.3                                          | Bovids, Table 16.8, Damuth and McFadden 2041      |
| Artiodactyla | Bovidae | <i>Rison</i> | sp. | 725   | unknown             | Plainview Quarry         | Hale           | Pleistocene | Present study | LM1 or LM2 | length of first or second lower molar |      | 3.01 | 1.31   | 842.58                                                                                                                                           | $\log(\text{Body mass, kg}) = \text{average}[3.520^* \log(\text{LM1, cm}) + 1.372, 3.375^* \log(\text{LM2, cm}) + 1.119]$                                | 0.94 | 30.8                                          | Bovids, Table 16.8, Damuth and McFadden 1990      |
| Artiodactyla | Bovidae | <i>Rison</i> | sp. | 725   | n-numbered (256-33) | Plainview Quarry         | Hale           | Pleistocene | Present study | LM3        | length of third lower molar           |      | 4.73 | 1.39   | 845.99                                                                                                                                           | $\log(\text{Body mass, kg}) = 3.236^* \log(\text{LM3, cm}) + 0.794$                                                                                      | 0.93 | 33.3                                          | Bovids, Table 16.8, Damuth and McFadden 2039      |
| Artiodactyla | Bovidae | <i>Rison</i> | sp. | 725   | n-numbered (256-33) | Plainview Quarry         | Hale           | Pleistocene | Present study | LM3        | length of third lower molar           |      | 4.74 | 1.36   | 852.96                                                                                                                                           | $\log(\text{Body mass, kg}) = 3.236^* \log(\text{LM3, cm}) + 0.793$                                                                                      | 0.93 | 33.3                                          | Bovids, Table 16.8, Damuth and McFadden 2038      |
| Artiodactyla | Bovidae | <i>Rison</i> | sp. | 1018  | unknown             | Sitter Ranch             | Donley         | Pleistocene | Present study | LM3        | length of first lower molar           |      | 4.73 | 1.50   | 853.46                                                                                                                                           | $\log(\text{Body mass, kg}) = 3.520^* (\log \text{LM1, cm}) + 1.372$                                                                                     | 0.93 | 34.0                                          | Bovids, Table 16.8, Damuth and McFadden 1990      |
| Artiodactyla | Bovidae | <i>Rison</i> | sp. | 725   | n-numbered (256-33) | Plainview Quarry         | Hale           | Pleistocene | Present study | LM3        | length of third lower molar           |      | 4.74 | 1.56   | 853.54                                                                                                                                           | $\log(\text{Body mass, kg}) = 3.236^* \log(\text{LM3, cm}) + 0.792$                                                                                      | 0.93 | 33.3                                          | Bovids, Table 16.8, Damuth and McFadden 2037      |
| Artiodactyla | Bovidae | <i>Rison</i> | sp. | 725   | n-numbered (256-33) | Plainview Quarry         | Hale           | Pleistocene | Present study | LM3        | length of third lower molar           |      | 4.74 | 1.50   | 854.13                                                                                                                                           | $\log(\text{Body mass, kg}) = 3.236^* \log(\text{LM3, cm}) + 0.791$                                                                                      | 0.93 | 33.3                                          | Bovids, Table 16.8, Damuth and McFadden 2036      |
| Artiodactyla | Bovidae | <i>Rison</i> | sp. | 725   | unknown             | Plainview Quarry         | Hale           | Pleistocene | Present study | LM1 or LM2 | length of first or second lower molar |      | 3.03 | 1.51   | 858.23                                                                                                                                           | $\log(\text{Body mass, kg}) = \text{average}[3.520^* \log(\text{LM1, cm}) + 1.372, 3.375^* \log(\text{LM2, cm}) + 1.119]$                                | 0.94 | 30.8                                          | Bovids, Table 16.8, Damuth and McFadden 1990      |
| Artiodactyla | Bovidae | <i>Rison</i> | sp. | 892   | unknown             | Lubbock Lake             | Lubbock        | Pleistocene | Present study | LM2        |                                       |      |      |        |                                                                                                                                                  |                                                                                                                                                          |      |                                               |                                                   |



|              |           |                 |     |       |         |                        |                |             |               |            |                                                   |      |         |       |                                                                                          |                                                                                                                                                                                                                            |      |                            |                                                        |
|--------------|-----------|-----------------|-----|-------|---------|------------------------|----------------|-------------|---------------|------------|---------------------------------------------------|------|---------|-------|------------------------------------------------------------------------------------------|----------------------------------------------------------------------------------------------------------------------------------------------------------------------------------------------------------------------------|------|----------------------------|--------------------------------------------------------|
| Artiodactyla | Bovidae   | <i>Bison</i>    | sp. | 892   | unknown | Lubbock Lake           | Lubbock        | Pleistocene | Present study | LM2        | length of second lower molar                      | L    | 3.83    | 1.62  | 1223.71                                                                                  | $\text{Log}(\text{Body mass, kg}) = 3.375 \cdot \text{Log}(\text{LM2, cm}) + 1.119$                                                                                                                                        | 0.93 | 33.6                       | Bovids, Table 16.8; Damuth and MacFadden 1990          |
| Artiodactyla | Bovidae   | <i>Bison</i>    | sp. | 45819 | 1608a   | Quitaque Creek         | Mooley         | Pleistocene | Present study | UM3        | length of third upper molar                       | L    | 4.47    | 2.66  | 1224.76                                                                                  | $\text{Log}(\text{Body mass, kg}) = 3.12 \cdot \text{Log}(\text{UM3, mm}) + 0.94$                                                                                                                                          | 0.90 | 39.4                       | Selenodonts, Table 16.9; Damuth and MacFadden 1990     |
| Artiodactyla | Bovidae   | <i>Bison</i>    | sp. | 755   | unknown | Plainsview Quarry      | Hale           | Pleistocene | Present study | LM1 or LM2 | length of first or second lower molar             | L    | 3.36    | 1.95  | 1233.10                                                                                  | $\text{Log}(\text{Body mass, kg}) = \text{average}[3.520 \cdot \text{Log}(\text{LM1, cm}) + 1.372, 3.375 \cdot \text{Log}(\text{LM2, cm}) + 1.119]$                                                                        | 0.94 | 30.8                       | Bovids, Table 16.8; Damuth and MacFadden 1990          |
| Artiodactyla | Bovidae   | <i>Bison</i>    | sp. | 31041 | 47      | Salt Fork Brazos River | Stonewall      | Pleistocene | Present study | LM1        | length of first lower molar                       | R    | 3.09    | 2.11  | 1242.16                                                                                  | $\text{Log}(\text{Body mass, kg}) = 3.520 \cdot \text{Log}(\text{LM1, cm}) + 1.372$                                                                                                                                        | 0.93 | 34.0                       | Bovids, Table 16.8; Damuth and MacFadden 1990          |
| Artiodactyla | Bovidae   | <i>Bison</i>    | sp. | 892   | unknown | Lubbock Lake           | Lubbock        | Pleistocene | Present study | M1 or M2   | length of first or second molar                   | L    | 3.53    | 2.33  | 1253.74                                                                                  | $(\text{Body mass, kg}) = \text{average}[3.520 \cdot \text{Log}(\text{M1, cm}) + 1.372, 3.375 \cdot \text{Log}(\text{LM2}) + 1.119, 3.395 \cdot \text{Log}(\text{UM2}) + 1.119]$                                           | 0.91 | 36.0                       | Bovids, Tables 16.8; Damuth and MacFadden 1990         |
| Artiodactyla | Bovidae   | <i>Bison</i>    | sp. | 892   | unknown | Lubbock Lake           | Lubbock        | Pleistocene | Present study | M1 or M2   | length of first or second molar                   | L    | 3.53    | 2.32  | 1257.42                                                                                  | $(\text{Body mass, kg}) = \text{average}[3.520 \cdot \text{Log}(\text{M1, cm}) + 1.372, 3.375 \cdot \text{Log}(\text{LM2}) + 1.119, 3.395 \cdot \text{Log}(\text{UM2}) + 1.119]$                                           | 0.91 | 36.0                       | Bovids, Tables 16.8; Damuth and MacFadden 1990         |
| Artiodactyla | Bovidae   | <i>Bison</i>    | sp. | 725   | unknown | Plainsview Quarry      | Hale           | Pleistocene | Present study | LM1 or LM2 | length of first or second lower molar             | L    | 3.39    | 1.71  | 1273.06                                                                                  | $\text{Log}(\text{Body mass, kg}) = \text{average}[3.520 \cdot \text{Log}(\text{LM1, cm}) + 1.372, 3.375 \cdot \text{Log}(\text{LM2, cm}) + 1.119]$                                                                        | 0.94 | 30.8                       | Bovids, Table 16.8; Damuth and MacFadden 1990          |
| Artiodactyla | Bovidae   | <i>Bison</i>    | sp. | 1018  | 11      | Sitter Ranch           | Donley         | Pleistocene | Present study | LM1        | length of first lower molar                       | L    | 3.11    | 1.85  | 1273.62                                                                                  | $\text{Log}(\text{Body mass, kg}) = 3.520 \cdot \text{Log}(\text{LM1, cm}) + 1.372$                                                                                                                                        | 0.93 | 34.0                       | Bovids, Table 16.8; Damuth and MacFadden 1990          |
| Artiodactyla | Bovidae   | <i>Bison</i>    | sp. | 725   | unknown | Plainsview Quarry      | Hale           | Pleistocene | Present study | LM2        | length of first or second lower molar             | L    | 3.88    | 1.60  | 1281.79                                                                                  | $\text{Log}(\text{Body mass, kg}) = 3.375 \cdot \text{Log}(\text{LM2, cm}) + 1.119$                                                                                                                                        | 0.93 | 33.6                       | Bovids, Table 16.8; Damuth and MacFadden 1990          |
| Artiodactyla | Bovidae   | <i>Bison</i>    | sp. | 725   | unknown | Plainsview Quarry      | Hale           | Pleistocene | Present study | LM1 or LM2 | length of first or second lower molar             | L    | 3.40    | 1.75  | 1283.52                                                                                  | $\text{Log}(\text{Body mass, kg}) = \text{average}[3.520 \cdot \text{Log}(\text{LM1, cm}) + 1.372, 3.375 \cdot \text{Log}(\text{LM2, cm}) + 1.119]$                                                                        | 0.94 | 30.8                       | Bovids, Table 16.8; Damuth and MacFadden 1990          |
| Artiodactyla | Bovidae   | <i>Bison</i>    | sp. | 1018  | 70      | Sitter Ranch           | Donley         | Pleistocene | Present study | LM1        | length of first or second lower molar             | R    | 3.12    | 1.93  | 1295.40                                                                                  | $\text{Log}(\text{Body mass, kg}) = 3.520 \cdot \text{Log}(\text{LM1, cm}) + 1.372$                                                                                                                                        | 0.93 | 34.0                       | Bovids, Table 16.8; Damuth and MacFadden 1990          |
| Artiodactyla | Bovidae   | <i>Bison</i>    | sp. | 45819 | 1608b   | Quitaque Creek         | Mooley         | Pleistocene | Present study | UM3        | length of third upper molar                       | L    | 4.56    | 2.48  | 1307.87                                                                                  | $\text{Log}(\text{Body mass, kg}) = 3.12 \cdot \text{Log}(\text{UM3, mm}) + 0.94$                                                                                                                                          | 0.90 | 39.4                       | Selenodonts, Table 16.9; Damuth and MacFadden 1990     |
| Artiodactyla | Bovidae   | <i>Bison</i>    | sp. | 892   | unknown | Lubbock Lake           | Lubbock        | Pleistocene | Present study | LM1        | length of first lower molar                       | L    | 3.13    | 1.51  | 1310.06                                                                                  | $\text{Log}(\text{Body mass, kg}) = 3.520 \cdot \text{Log}(\text{LM1, cm}) + 1.372$                                                                                                                                        | 0.93 | 34.0                       | Bovids, Table 16.8; Damuth and MacFadden 1990          |
| Artiodactyla | Bovidae   | <i>Bison</i>    | sp. | 892   | unknown | Lubbock Lake           | Lubbock        | Pleistocene | Present study | M1 or M2   | length of first or second molar                   | L    | 3.59    | 2.40  | 1321.27                                                                                  | $(\text{Body mass, kg}) = \text{average}[3.520 \cdot \text{Log}(\text{M1, cm}) + 1.372, 3.375 \cdot \text{Log}(\text{LM2}) + 1.119, 3.395 \cdot \text{Log}(\text{UM2}) + 1.119]$                                           | 0.91 | 36.0                       | Bovids, Table 16.8; Damuth and MacFadden 1990          |
| Artiodactyla | Bovidae   | <i>Bison</i>    | sp. | 725   | unknown | Plainsview Quarry      | Hale           | Pleistocene | Present study | LM1 or LM2 | length of first or second lower molar             | L    | 3.44    | 1.49  | 1335.39                                                                                  | $\text{Log}(\text{Body mass, kg}) = \text{average}[3.520 \cdot \text{Log}(\text{LM1, cm}) + 1.372, 3.375 \cdot \text{Log}(\text{LM2, cm}) + 1.119]$                                                                        | 0.94 | 30.8                       | Bovids, Table 16.8; Damuth and MacFadden 1990          |
| Artiodactyla | Bovidae   | <i>Bison</i>    | sp. | 908   | 2482    | Kincaid Shelter        | Uvalde         | Pleistocene | Present study | Mc         | distal end of metacarpal                          | R    | 8.93    | 4.75  | 1335.67                                                                                  | $\text{Log}(\text{Body mass, kg}) = 2.695 \cdot \text{Log}(\text{MC2, cm}) + 0.6016$                                                                                                                                       | 0.95 | 20.0                       | Bovids, Table 16.7; Damuth and MacFadden 1990          |
| Artiodactyla | Bovidae   | <i>Bison</i>    | sp. | 725   | unknown | Plainsview Quarry      | Hale           | Pleistocene | Present study | LM1 or LM2 | length of first or second lower molar             | L    | 3.44    | 1.53  | 1336.74                                                                                  | $\text{Log}(\text{Body mass, kg}) = \text{average}[3.520 \cdot \text{Log}(\text{LM1, cm}) + 1.372, 3.375 \cdot \text{Log}(\text{LM2, cm}) + 1.119]$                                                                        | 0.94 | 30.8                       | Bovids, Table 16.8; Damuth and MacFadden 1990          |
| Artiodactyla | Bovidae   | <i>Bison</i>    | sp. | 725   | unknown | Plainsview Quarry      | Hale           | Pleistocene | Present study | LM1 or LM2 | length of first or second lower molar             | L    | 3.45    | 1.45  | 1339.29                                                                                  | $\text{Log}(\text{Body mass, kg}) = \text{average}[3.520 \cdot \text{Log}(\text{LM1, cm}) + 1.372, 3.375 \cdot \text{Log}(\text{LM2, cm}) + 1.119]$                                                                        | 0.94 | 30.8                       | Bovids, Table 16.8; Damuth and MacFadden 1990          |
| Artiodactyla | Bovidae   | <i>Bison</i>    | sp. | 725   | unknown | Plainsview Quarry      | Hale           | Pleistocene | Present study | LM1 or LM2 | length of first or second lower molar             | L    | 3.45    | 1.97  | 1351.65                                                                                  | $\text{Log}(\text{Body mass, kg}) = \text{average}[3.520 \cdot \text{Log}(\text{LM1, cm}) + 1.372, 3.375 \cdot \text{Log}(\text{LM2, cm}) + 1.119]$                                                                        | 0.94 | 30.8                       | Bovids, Table 16.8; Damuth and MacFadden 1990          |
| Artiodactyla | Bovidae   | <i>Bison</i>    | sp. | 40450 | 2571    | Cave without a Name    | Kendall        | Pleistocene | Present study | LM1 or LM2 | length of first or second lower molar             | L    | 3.47    | 1.33  | 1372.17                                                                                  | $\text{Log}(\text{Body mass, kg}) = \text{average}[3.520 \cdot \text{Log}(\text{LM1, cm}) + 1.372, 3.375 \cdot \text{Log}(\text{LM2, cm}) + 1.119]$                                                                        | 0.94 | 30.8                       | Bovids, Table 16.8; Damuth and MacFadden 1990          |
| Artiodactyla | Bovidae   | <i>Bison</i>    | sp. | 31108 | 70      | Old Glory              | Stonewall      | Pleistocene | Present study | LM2        | length of second lower molar                      | L    | 3.99    | 1.78  | 1404.92                                                                                  | $\text{Log}(\text{Body mass, kg}) = 3.375 \cdot \text{Log}(\text{LM2, cm}) + 1.119$                                                                                                                                        | 0.93 | 33.6                       | Bovids, Table 16.8; Damuth and MacFadden 1990          |
| Artiodactyla | Bovidae   | <i>Bison</i>    | sp. | 725   | unknown | Plainsview Quarry      | Hale           | Pleistocene | Present study | LM1 or LM2 | length of first or second lower molar             | L    | 3.49    | 1.47  | 1405.46                                                                                  | $\text{Log}(\text{Body mass, kg}) = \text{average}[3.520 \cdot \text{Log}(\text{LM1, cm}) + 1.372, 3.375 \cdot \text{Log}(\text{LM2, cm}) + 1.119]$                                                                        | 0.94 | 30.8                       | Bovids, Table 16.8; Damuth and MacFadden 1990          |
| Artiodactyla | Bovidae   | <i>Bison</i>    | sp. | 725   | unknown | Plainsview Quarry      | Hale           | Pleistocene | Present study | LM1 or LM2 | length of first or second lower molar             | L    | 3.49    | 1.24  | 1409.66                                                                                  | $\text{Log}(\text{Body mass, kg}) = \text{average}[3.520 \cdot \text{Log}(\text{LM1, cm}) + 1.372, 3.375 \cdot \text{Log}(\text{LM2, cm}) + 1.119]$                                                                        | 0.94 | 30.8                       | Bovids, Table 16.8; Damuth and MacFadden 1990          |
| Artiodactyla | Bovidae   | <i>Bison</i>    | sp. | 937   | 38      | Blackwater Draw        | sewehvi Co., N | Pleistocene | Present study | M1 or M2   | length of first or second molar                   | L    | 3.68    | 2.28  | 1446.28                                                                                  | $(\text{Body mass, kg}) = \text{average}[3.520 \cdot \text{Log}(\text{M1, cm}) + 1.372, 3.375 \cdot \text{Log}(\text{LM2}) + 1.119, 3.395 \cdot \text{Log}(\text{UM2}) + 1.119]$                                           | 0.91 | 36.0                       | Bovids, Table 16.8; Damuth and MacFadden 1990          |
| Artiodactyla | Bovidae   | <i>Bison</i>    | sp. | 1018  | 3       | Sitter Ranch           | Donley         | Pleistocene | Present study | LM1        | length of first lower molar                       | L    | 3.24    | 2.12  | 1478.11                                                                                  | $\text{Log}(\text{Body mass, kg}) = 3.520 \cdot \text{Log}(\text{LM1, cm}) + 1.372$                                                                                                                                        | 0.93 | 34.0                       | Bovids, Table 16.8; Damuth and MacFadden 1990          |
| Artiodactyla | Bovidae   | <i>Bison</i>    | sp. | 892   | unknown | Lubbock Lake           | Lubbock        | Pleistocene | Present study | M1 or M2   | length of first or second molar                   | R    | 3.73    | 2.43  | 1511.14                                                                                  | $(\text{Body mass, kg}) = \text{average}[3.520 \cdot \text{Log}(\text{M1, cm}) + 1.372, 3.375 \cdot \text{Log}(\text{LM2}) + 1.119, 3.395 \cdot \text{Log}(\text{UM2}) + 1.119]$                                           | 0.91 | 36.0                       | Bovids, Tables 16.8; Damuth and MacFadden 1990         |
| Artiodactyla | Bovidae   | <i>Bison</i>    | sp. | 933   | 3285    | Friesenhahn cave       | Rear           | Pleistocene | Present study | LM2        | length of second lower molar                      | R    | 4.11    | 1.86  | 1522.65                                                                                  | $\text{Log}(\text{Body mass, kg}) = 3.375 \cdot \text{Log}(\text{LM2, cm}) + 1.119$                                                                                                                                        | 0.93 | 33.6                       | Bovids, Table 16.8; Damuth and MacFadden 1990          |
| Artiodactyla | Bovidae   | <i>Bison</i>    | sp. | 892   | 438     | Lubbock Lake           | Lubbock        | Pleistocene | Present study | M1 or M2   | length of first or second molar                   | L    | 3.99    | 1.66  | 1594.55                                                                                  | $(\text{Body mass, kg}) = \text{average}[3.520 \cdot \text{Log}(\text{M1, cm}) + 1.372, 3.375 \cdot \text{Log}(\text{LM2}) + 1.119, 3.395 \cdot \text{Log}(\text{UM2}) + 1.119]$                                           | 0.91 | 36.0                       | Bovids, Tables 16.8; Damuth and MacFadden 1990         |
| Artiodactyla | Camelidae | <i>Camelops</i> | sp. | 35    | 2534    | Trinity River          | Dallas         | Pleistocene | Present study | UM1        | length of first upper molar                       | L    | 2.55    | 2.63  | 1711.8                                                                                   | $\text{Log}(\text{Body mass, g}) = 3.19 \cdot \text{Log}(\text{UM1, mm}) + 1.17$                                                                                                                                           | 0.90 | 39.8                       | Selenodonts, Table 16.9; Damuth and MacFadden 1990     |
| Artiodactyla | Camelidae | <i>Camelops</i> | sp. | 2839  | 51      | Moshuis Mound          | Victoria       | Pleistocene | Present study | CaL        | length of calcaneum                               | R    | 14.40   | 21.1  | 1840.92                                                                                  | $\text{Log}(\text{Body mass, g}) = 2.969 \cdot \text{Log}(\text{CaL, mm}) + 1.61$                                                                                                                                          | 0.94 | 44.1                       | Tsubamoto 2019, Table 3, land mammals                  |
| Artiodactyla | Camelidae | <i>Camelops</i> | sp. | 3967  | 1599    | Ingleside              | San Patricio   | Pleistocene | Present study | SLA        | length of skull                                   | R    | 50.40   | 25.00 | 1955.7                                                                                   | $\text{Log}(\text{Body mass, kg}) = 2.973 \cdot \text{Log}(\text{SLA, cm}) - 2.344$                                                                                                                                        | 0.95 | 38.5                       | Ungulates, Table 16.8; Damuth and MacFadden 1990       |
| Artiodactyla | Camelidae | <i>Camelops</i> | sp. | 2839  | 16      | Moshuis Mound          | Victoria       | Pleistocene | Present study | SK         | cross-sectional area of astragalus                | R    | 6.97    | 4.32  | 1927.7                                                                                   | $\text{Log}(\text{Body mass, g}) = 1.465 \cdot \text{Log}(\text{ASa, mm}) + 0.633$                                                                                                                                         | 0.98 | 33.4                       | all terrestrial mammals, Table 1; Tsubamoto 2014       |
| Artiodactyla | Camelidae | <i>Camelops</i> | sp. | 35    | 2534    | Trinity River          | Dallas         | Pleistocene | Present study | UM2        | length of second upper molar                      | R    | 3.26    | 3.03  | 231.5                                                                                    | $\text{Log}(\text{Body mass, kg}) = 3.184 \cdot \text{Log}(\text{UM2, cm}) + 1.091$                                                                                                                                        | 0.93 | 34.7                       | Ungulates, Table 16.8; Damuth and MacFadden 1990       |
| Artiodactyla | Camelidae | <i>Camelops</i> | sp. | 998   | 28      | Scharbauer Ranch       | Midland        | Pleistocene | Present study | UM2        | cross-sectional area of astragalus                | L    | 1.18    | 4.43  | 691.9                                                                                    | $\text{Log}(\text{Body mass, g}) = 1.465 \cdot \text{Log}(\text{ASa, mm}) + 0.633$                                                                                                                                         | 0.98 | 33.4                       | all terrestrial mammals, Table 1; Tsubamoto 2014       |
| Artiodactyla | Camelidae | <i>Camelops</i> | sp. | 3967  | 1122    | Ingleside              | San Patricio   | Pleistocene | Present study | LM1        | length of first lower molar                       | L    | 2.82    | 1.91  | 714.6                                                                                    | $\text{Log}(\text{Body mass, kg}) = 3.263 \cdot \text{Log}(\text{LM1, cm}) + 1.337$                                                                                                                                        | 0.93 | 34.6                       | all ungulates, Table 16.8; Damuth and MacFadden 1990   |
| Artiodactyla | Camelidae | <i>Camelops</i> | sp. | 31041 | 79      | Salt Fork Brazos River | Stonewall      | Pleistocene | Present study | LM1        | length of third lower molar                       | L    | 4.75    | 1.65  | 721.7                                                                                    | $\text{Log}(\text{Body mass, kg}) = 3.19 \cdot \text{Log}(\text{LM3, mm}) + 0.51$                                                                                                                                          | 0.90 | 39.4                       | All selenodonts, Table 16.9; Damuth and MacFadden 1990 |
| Artiodactyla | Camelidae | <i>Camelops</i> | sp. | 3967  | 915     | Ingleside              | San Patricio   | Pleistocene | Present study | UM2        | length of second upper molar                      | R    | 3.68    | 3.33  | 783.7                                                                                    | $\text{Log}(\text{Body mass, kg}) = 3.184 \cdot \text{Log}(\text{UM2, cm}) + 1.091$                                                                                                                                        | 0.93 | 34.7                       | Ungulates, Table 16.8; Damuth and MacFadden 1990       |
| Artiodactyla | Camelidae | <i>Camelops</i> | sp. | 3967  | 1240    | Ingleside              | San Patricio   | Pleistocene | Present study | UM2        | length of second upper molar                      | R    | 3.77    | 2.26  | 843.5                                                                                    | $\text{Log}(\text{Body mass, kg}) = 3.184 \cdot \text{Log}(\text{UM2, cm}) + 1.091$                                                                                                                                        | 0.93 | 34.7                       | Ungulates, Table 16.8; Damuth and MacFadden 1990       |
| Artiodactyla | Camelidae | <i>Camelops</i> | sp. | 31034 | 13      | O'Brian Ranch          | Bee            | Pleistocene | Present study | LM1        | length of first lower molar                       | L    | 3.17    | 1.87  | 941.3                                                                                    | $\text{Log}(\text{Body mass, kg}) = 3.263 \cdot \text{Log}(\text{LM1, cm}) + 1.337$                                                                                                                                        | 0.93 | 34.6                       | all ungulates, Table 16.8; Damuth and MacFadden 1990   |
| Artiodactyla | Camelidae | <i>Camelops</i> | sp. | 31205 | 3       | Mayfield Ranch         | Briscoe        | Pleistocene | Present study | LM1        | length of first lower molar                       | L    | 3.20    | 1.96  | 967.7                                                                                    | $\text{Log}(\text{Body mass, kg}) = 3.263 \cdot \text{Log}(\text{LM1, cm}) + 1.337$                                                                                                                                        | 0.93 | 34.6                       | all ungulates, Table 16.8; Damuth and MacFadden 1990   |
| Artiodactyla | Camelidae | <i>Camelops</i> | sp. | 31141 | 2375    | Aransas River          | San Patricio   | Pleistocene | Present study | LM1? LM3?  | length of third lower molar                       | L    | 5.27    | 1.94  | 1,008.4                                                                                  | $\text{Log}(\text{Body mass, g}) = 3.19 \cdot \text{Log}(\text{LM3, mm}) + 0.51$                                                                                                                                           | 0.90 | 39.4                       | selenodonts, Table 16.9; Damuth and MacFadden 1990     |
| Artiodactyla | Camelidae | <i>Camelops</i> | sp. | 31205 | 3       | Mayfield Ranch         | Briscoe        | Pleistocene | Present study | LM3        | length of third lower molar                       | L    | 1,013.3 | 1.73  | 1,013.3                                                                                  | $\text{Log}(\text{Body mass, g}) = 3.19 \cdot \text{Log}(\text{LM3, mm}) + 0.51$                                                                                                                                           | 0.90 | 39.4                       | selenodonts, Table 16.9; Damuth and MacFadden 1990     |
| Artiodactyla | Camelidae | <i>Camelops</i> | sp. | 3967  | 1599    | Ingleside              | San Patricio   | Pleistocene | Present study | LM1        | length of first lower molar                       | L    | 3.27    | 1.77  | 1,033.3                                                                                  | $\text{Log}(\text{Body mass, kg}) = 3.263 \cdot \text{Log}(\text{LM1, cm}) + 1.337$                                                                                                                                        | 0.93 | 34.6                       | all ungulates, Table 16.8; Damuth and MacFadden 1990   |
| Artiodactyla | Camelidae | <i>Camelops</i> | sp. | 3     | 1999    | Pittsbridge            | Brazos         | Pleistocene | Present study | M          | length of second or third molar                   | L    | 4.33    | 1.33  | 1,093.3                                                                                  | $\text{Log}(\text{Body mass, g}) = \text{average}[3.21 \cdot \text{Log}(\text{LM2}) + 0.92, 3.19 \cdot \text{Log}(\text{LM3}) + 0.51, 3.15 \cdot \text{Log}(\text{UM2}) + 0.94, 3.12 \cdot \text{Log}(\text{UM3}) + 0.88]$ | 0.88 | 42.5                       | All selenodonts, Table 16.8; Damuth and MacFadden 1990 |
| Artiodactyla | Camelidae | <i>Camelops</i> | sp. | 31041 | 75      | Salt Fork Brazos River | Stonewall      | Pleistocene | Present study | HuM3PC     | midshaft anteroposterior circumference of humerus | 20.5 | 1,096.2 |       | $\text{Log}(\text{Body mass, g}) = 2.66975 \cdot \text{Log}(\text{HuM3PC, g}) - 0.13193$ | 0.98                                                                                                                                                                                                                       |      | All mammals, Present Study |                                                        |
| Artiodactyla | Camelidae | <i>Camelops</i> | sp. | 999   | 999     | Cameron                | Milam          | Pleistocene | Present study | M3         | length of third molar                             | M    | 5.42    | 1.99  | 1,099.5                                                                                  | $\text{Log}(\text{Body mass, kg}) = 3.19 \cdot \text{Log}(\text{LM3, mm}) + 0.51$                                                                                                                                          | 0.89 | 39.2                       | All selenodonts                                        |





|              |          |            |     |        |         |                          |              |               |                 |                              |                                       |      |      |                                                 |                                                                                                                 |       |                                                |                                                             |
|--------------|----------|------------|-----|--------|---------|--------------------------|--------------|---------------|-----------------|------------------------------|---------------------------------------|------|------|-------------------------------------------------|-----------------------------------------------------------------------------------------------------------------|-------|------------------------------------------------|-------------------------------------------------------------|
| Artiodactyla | Cervidae | Odocoileus | sp. | 40544  | 223     | Sheep Shelter            | Hill         | Holocene      | Present study   | UP                           | length of upper premolar              | 1.15 | 1.28 | 60.0                                            | og(Body mass, g) = average[3.26*Log(UPr2, mm) + 1.31, 3.13*Log(UP3) + 1.4, 3.05*Log(UP4) + 1.4]                 | >0.86 | -65                                            | Selenodont browser, Table 16.9; Damuth and MacFadden 1990   |
| Artiodactyla | Cervidae | Odocoileus | sp. | 999    | 649     | Hearne gravel pits       | Robertson    | Pleistocene   | Present study   | LM1                          | length of first lower molar           | 1.42 | 0.79 | 60.2                                            | Log(Body mass, kg) = 3.334*Log(LM1, cm) + 1.270                                                                 | 0.93  | 23.9                                           | Cervids, Table 16.8; Damuth and MacFadden 1990              |
| Artiodactyla | Cervidae | Odocoileus | sp. | 908    | 649     | Kincaid Shelter          | Uvalde       | Pleistocene   | Present study   | Mc                           | distal end of metacarpal              | 2.77 | 1.83 | 60.4                                            | Log(Body mass, kg) = 2.6568*Log(MC2, cm) + 0.607                                                                | 0.95  | 26.0                                           | Cervids, Table 16.7; Damuth and MacFadden 1990              |
| Artiodactyla | Cervidae | Odocoileus | sp. | 908    | 3972    | Kincaid Shelter          | Uvalde       | Holocene      | Present study   | ASA                          | length of first lower molar           | 1.30 | 1.98 | 61.5                                            | Log(Body mass, g) = 1.463*Log(ASA, mm) + 0.633                                                                  | 0.98  | 33.4                                           | all terrestrial mammals, Table 1; Tsabamoto 2014            |
| Artiodactyla | Cervidae | Odocoileus | sp. | 43407  | unknown | Honey Creek Cave         | Mason        | Holocene      | Present study   | LM1                          | length of first lower molar           | 1.43 | 0.86 | 61.8                                            | Log(Body mass, kg) = 3.334*Log(LM1, cm) + 1.270                                                                 | 0.93  | 23.9                                           | Cervids, Table 16.8; Damuth and MacFadden 1990              |
| Artiodactyla | Cervidae | Odocoileus | sp. | 404513 | 143     | Wunderlich site          | Comal        | Holocene      | Present study   | LM1                          | length of first lower molar           | 1.44 | 1.31 | 62.1                                            | Log(Body mass, kg) = 3.334*Log(LM1, cm) + 1.270                                                                 | 0.93  | 23.9                                           | Cervids, Table 16.8; Damuth and MacFadden 1990              |
| Artiodactyla | Cervidae | Odocoileus | sp. | 908    | 1349    | Kincaid Shelter          | Uvalde       | Pleistocene   | Present study   | Mc                           | distal end of metacarpal              | 2.80 | 1.82 | 62.3                                            | Log(Body mass, kg) = 2.6568*Log(MC2, cm) + 0.607                                                                | 0.95  | 26.0                                           | Cervids, Table 16.7; Damuth and MacFadden 1990              |
| Artiodactyla | Cervidae | Odocoileus | sp. | 908    | 1750    | Kincaid Shelter          | Uvalde       | Holocene      | Present study   | UM                           | length of upper molar                 | 1.57 | 1.41 | 62.8                                            | Log(Body mass, g) = average[3.21*Log(UM1)+1.07, 3.34*Log(UM2)+0.73, 3.29*Log(UM3)+0.8]                          | >0.86 | -50                                            | Selenodont browser, Table 16.9; Damuth and MacFadden 1990   |
| Artiodactyla | Cervidae | Odocoileus | sp. | 908    | 1100    | Kincaid Shelter          | Uvalde       | Pleistocene   | Present study   | Mc                           | distal end of metacarpal              | 1.81 | 1.90 | 62.8                                            | Log(Body mass, kg) = 2.6568*Log(MC2, cm) + 0.607                                                                | 0.95  | 26.0                                           | Cervids, Table 16.7; Damuth and MacFadden 1990              |
| Artiodactyla | Cervidae | Odocoileus | sp. | 40618  | 47      | Smith Rockshelter        | Travis       | Holocene      | Present study   | UP4                          | length of fourth upper premolar       | 1.12 | 1.19 | 62.9                                            | Log(Body mass, g) = 1.463*Log(UP4, mm) + 1.60                                                                   | 0.91  | 52.3                                           | Selenodont browser, Table 16.9; Damuth and MacFadden 1990   |
| Artiodactyla | Cervidae | Odocoileus | sp. | 908    | 84      | Kincaid Shelter          | Uvalde       | Holocene      | Present study   | LM1                          | length of first lower molar           | 1.58 | 1.40 | 64.1                                            | Log(Body mass, g) = average[3.21*Log(UM1)+1.07, 3.34*Log(UM2)+0.73, 3.29*Log(UM3)+0.8]                          | >0.86 | -50                                            | Selenodont browser, Table 16.9; Damuth and MacFadden 1990   |
| Artiodactyla | Cervidae | Odocoileus | sp. | 908    | 3949    | Kincaid Shelter          | Uvalde       | Holocene      | Present study   | Mc                           | distal end of metacarpal              | 2.83 | 1.87 | 64.2                                            | Log(Body mass, kg) = 2.6568*Log(MC2, cm) + 0.607                                                                | 0.95  | 26.0                                           | Cervids, Table 16.7; Damuth and MacFadden 1990              |
| Artiodactyla | Cervidae | Odocoileus | sp. | 40449  | 105     | Levi Shelter             | Travis       | Pleistocene   | Present study   | LM1                          | length of first lower molar           | 1.45 | 0.79 | 64.6                                            | Log(Body mass, kg) = 3.334*Log(LM1, cm) + 1.270                                                                 | 0.93  | 23.9                                           | Cervids, Table 16.8; Damuth and MacFadden 1990              |
| Artiodactyla | Cervidae | Odocoileus | sp. | 908    | 3930    | Kincaid Shelter          | Uvalde       | Holocene      | Present study   | Mc                           | distal end of metacarpal              | 2.84 | 1.87 | 64.8                                            | Log(Body mass, kg) = 2.6568*Log(MC2, cm) + 0.607                                                                | 0.95  | 26.0                                           | Cervids, Table 16.7; Damuth and MacFadden 1990              |
| Artiodactyla | Cervidae | Odocoileus | sp. | 40451  | 93B     | Wunderlich site          | Comal        | Holocene      | Present study   | M                            | length of molar                       | 1.67 | 1.53 | 65.3                                            | 1) = average[3.334*Log(LM1, cm) + 1.27, 3.106*Log(LM2) + 1.118, 3.143*Log(LM3) + 0.799, 3.218*Log(LM4) + 0.799] | 0.88  | 42.5                                           | Cervids, Table 16.8; Damuth and MacFadden 1990              |
| Artiodactyla | Cervidae | Odocoileus | sp. | 40449  | 140     | Levi Shelter             | Travis       | Pleistocene   | Present study   | UM1                          | length of first upper molar           | 1.47 | 1.19 | 65.6                                            | Log(Body mass, g) = 3.21*Log(UM1, mm) + 1.07                                                                    | 0.96  | 35.1                                           | Selenodont browsers, Table 16.9; Damuth and MacFadden 1990  |
| Artiodactyla | Cervidae | Odocoileus | sp. | 40451  | 134     | Wunderlich site          | Comal        | Holocene      | Present study   | LM3                          | length of third lower molar           | 1.11 | 1.10 | 65.6                                            | Log(Body mass, kg) = 3.143*Log(LM3, cm) + 0.799                                                                 | 0.96  | 19.1                                           | Cervids, Table 16.8; Damuth and MacFadden, Janis C.M. 1990. |
| Artiodactyla | Cervidae | Odocoileus | sp. | 43192  | 1       | Hughes Ranch Indian Camp | Pleistocene  | Present study | LM2             | length of second lower molar | 1.68                                  | 0.92 | 65.9 | Log(Body mass, kg) = 3.106*Log(LM2, cm) + 1.119 | 0.95                                                                                                            | 20.4  | Cervids, Table 16.8; Damuth and MacFadden 1990 |                                                             |
| Artiodactyla | Cervidae | Odocoileus | sp. | 41174  | 55      | Felton cave              | Sutton       | Holocene      | Present study   | LM2                          | length of second lower molar          | 1.68 | 0.97 | 67.0                                            | ody mass, kg) = average[3.334*Log(LM1, cm) + 1.270, 3.106*Log(LM2) + 1.118, 3.143*Log(LM3) + 0.799]             | 0.95  | 21.7                                           | Cervids, Table 16.8; Damuth and MacFadden 1990              |
| Artiodactyla | Cervidae | Odocoileus | sp. | 40618  | 11      | Smith Rockshelter        | Travis       | Holocene      | Present study   | LM3                          | length of third lower molar           | 2.13 | 0.03 | 67.3                                            | Log(Body mass, kg) = 3.143*Log(LM3, cm) + 0.799                                                                 | 0.96  | 19.1                                           | cervids, Table 16.8; Damuth and MacFadden, Janis C.M. 1990. |
| Artiodactyla | Cervidae | Odocoileus | sp. | 908    | 3114    | Kincaid Shelter          | Uvalde       | Pleistocene   | Present study   | ASA                          | cross-sectional area of astragalus    | 3.62 | 2.04 | 67.6                                            | Log(Body mass, g) = 1.463*Log(ASA, mm) + 0.633                                                                  | 0.98  | 33.4                                           | all terrestrial mammals, Table 1; Tsabamoto 2014            |
| Artiodactyla | Cervidae | Odocoileus | sp. | 908    | 2183    | Kincaid Shelter          | Uvalde       | Pleistocene   | Present study   | ASA                          | cross-sectional area of astragalus    | 3.58 | 2.07 | 67.8                                            | Log(Body mass, g) = 1.463*Log(ASA, mm) + 0.633                                                                  | 0.98  | 33.4                                           | all terrestrial mammals, Table 1; Tsabamoto 2014            |
| Artiodactyla | Cervidae | Odocoileus | sp. | 39067  | 1823    | Ingleside                | San Patricio | Pleistocene   | Landelius 1972b | UM1                          | length of first upper molar           | 1.49 | 1.44 | 68.5                                            | Log(Body mass, g) = 3.21*Log(UM1, mm) + 1.07                                                                    | 0.96  | 35.1                                           | Selenodont browsers, Table 16.9; Damuth and MacFadden 1990  |
| Artiodactyla | Cervidae | Odocoileus | sp. | 908    | 3969E   | Kincaid Shelter          | Uvalde       | Holocene      | Present study   | ASA                          | cross-sectional area of astragalus    | 3.74 | 2.05 | 68.7                                            | Log(Body mass, g) = 1.463*Log(ASA, mm) + 0.633                                                                  | 0.98  | 33.4                                           | all terrestrial mammals, Table 1; Tsabamoto 2014            |
| Artiodactyla | Cervidae | Odocoileus | sp. | 908    | 1601    | Kincaid Shelter          | Uvalde       | Pleistocene   | Present study   | ASA                          | cross-sectional area of astragalus    | 3.60 | 2.03 | 68.9                                            | Log(Body mass, g) = 1.463*Log(ASA, mm) + 0.633                                                                  | 0.98  | 33.4                                           | all terrestrial mammals, Table 1; Tsabamoto 2014            |
| Artiodactyla | Cervidae | Odocoileus | sp. | 40449  | 122     | Levi Shelter             | Travis       | Pleistocene   | Present study   | UM1                          | length of first upper molar           | 1.49 | 0.99 | 69.1                                            | Log(Body mass, g) = 3.21*Log(UM1, mm) + 1.07                                                                    | 0.96  | 35.1                                           | Selenodont browsers, Table 16.9; Damuth and MacFadden 1990  |
| Artiodactyla | Cervidae | Odocoileus | sp. | 908    | 3968B   | Kincaid Shelter          | Uvalde       | Holocene      | Present study   | ASA                          | cross-sectional area of astragalus    | 3.53 | 2.14 | 69.8                                            | Log(Body mass, g) = 1.463*Log(ASA, mm) + 0.633                                                                  | 0.98  | 33.4                                           | all terrestrial mammals, Table 1; Tsabamoto 2014            |
| Artiodactyla | Cervidae | Odocoileus | sp. | 40451  | 60      | Wunderlich site          | Comal        | Holocene      | Present study   | LM3                          | length of third lower molar           | 2.15 | 1.00 | 69.8                                            | Log(Body mass, kg) = 3.143*Log(LM3, cm) + 0.799                                                                 | 0.96  | 19.1                                           | Cervids, Table 16.8; Damuth and MacFadden, Janis C.M. 1990. |
| Artiodactyla | Cervidae | Odocoileus | sp. | 40279  | 105     | Loughon Cave             | Barnet       | Pleistocene   | Present study   | UM1                          | length of first upper molar           | 1.50 | 1.26 | 70.0                                            | Log(Body mass, g) = 3.21*Log(UM1, mm) + 1.07                                                                    | 0.96  | 35.1                                           | Selenodont browsers, Table 16.9; Damuth and MacFadden 1990  |
| Artiodactyla | Cervidae | Odocoileus | sp. | 908    | 130     | Kincaid Shelter          | Uvalde       | Holocene      | Present study   | ASA                          | cross-sectional area of astragalus    | 3.65 | 2.08 | 70.1                                            | Log(Body mass, g) = 1.463*Log(ASA, mm) + 0.633                                                                  | 0.98  | 33.4                                           | all terrestrial mammals, Table 1; Tsabamoto 2014            |
| Artiodactyla | Cervidae | Odocoileus | sp. | 43077  | 71      | Honey Creek Cave         | Mason        | Pleistocene   | Present study   | LM1 or LM2                   | length of first or second lower molar | 1.58 | 0.94 | 70.4                                            | Log(Body mass, kg) = average[3.334*Log(LM1, cm) + 1.270, 3.108*Log(LM2, cm) + 1.119]                            | 0.95  | 23.9                                           | Cervids, Table 16.8; Damuth and MacFadden 1990              |
| Artiodactyla | Cervidae | Odocoileus | sp. | 908    | 3945    | Kincaid Shelter          | Uvalde       | Holocene      | Present study   | Mc                           | distal end of metacarpal              | 2.94 | 2.04 | 70.9                                            | Log(Body mass, kg) = 2.6568*Log(MC2, cm) + 0.607                                                                | 0.95  | 26.0                                           | Cervids, Table 16.7; Damuth and MacFadden 1990              |
| Artiodactyla | Cervidae | Odocoileus | sp. | 40451  | 125     | Wunderlich site          | Comal        | Holocene      | Present study   | UM3                          | length of third upper molar           | 1.70 | 1.41 | 71.0                                            | Log(Body mass, g) = 3.29*Log(UM3, mm) + 0.8                                                                     | 0.93  | 44.7                                           | Selenodont browsers, Table 16.9; Damuth and MacFadden 1990  |
| Artiodactyla | Cervidae | Odocoileus | sp. | 40618  | 134     | Smith Rockshelter        | Travis       | Holocene      | Present study   | LM1                          | length of first lower molar           | 1.50 | 0.84 | 71.3                                            | Log(Body mass, kg) = 3.334*Log(LM1, cm) + 1.270                                                                 | 0.93  | 23.9                                           | Cervids, Table 16.8; Damuth and MacFadden 1990              |
| Artiodactyla | Cervidae | Odocoileus | sp. | 908    | 3329    | Kincaid Shelter          | Uvalde       | Holocene      | Present study   | ASA                          | cross-sectional area of astragalus    | 3.71 | 2.07 | 71.3                                            | Log(Body mass, g) = 1.463*Log(ASA, mm) + 0.633                                                                  | 0.98  | 33.4                                           | all terrestrial mammals, Table 1; Tsabamoto 2014            |
| Artiodactyla | Cervidae | Odocoileus | sp. | 41174  | 4       | Felton cave              | Sutton       | Holocene      | Present study   | LM1                          | length of first lower molar           | 1.50 | 1.02 | 71.5                                            | Log(Body mass, kg) = 3.334*Log(LM1, cm) + 1.270                                                                 | 0.93  | 23.9                                           | Cervids, Table 16.8; Damuth and MacFadden 1990              |
| Artiodactyla | Cervidae | Odocoileus | sp. | 908    | 97      | Kincaid Shelter          | Uvalde       | Holocene      | Present study   | ASA                          | cross-sectional area of astragalus    | 3.70 | 2.07 | 71.5                                            | Log(Body mass, g) = 1.463*Log(ASA, mm) + 0.633                                                                  | 0.98  | 33.4                                           | all terrestrial mammals, Table 1; Tsabamoto 2014            |
| Artiodactyla | Cervidae | Odocoileus | sp. | 908    | 3969F   | Kincaid Shelter          | Uvalde       | Holocene      | Present study   | ASA                          | cross-sectional area of astragalus    | 3.76 | 2.05 | 71.5                                            | Log(Body mass, g) = 1.463*Log(ASA, mm) + 0.633                                                                  | 0.98  | 33.4                                           | all terrestrial mammals, Table 1; Tsabamoto 2014            |
| Artiodactyla | Cervidae | Odocoileus | sp. | 908    | 690     | Kincaid Shelter          | Uvalde       | Holocene      | Present study   | ASA                          | cross-sectional area of astragalus    | 3.54 | 2.17 | 71.6                                            | Log(Body mass, g) = 1.463*Log(ASA, mm) + 0.633                                                                  | 0.98  | 33.4                                           | all terrestrial mammals, Table 1; Tsabamoto 2014            |
| Artiodactyla | Cervidae | Odocoileus | sp. | 908    | 3947    | Kincaid Shelter          | Uvalde       | Holocene      | Present study   | Mc                           | distal end of metacarpal              | 2.95 | 1.89 | 71.8                                            | Log(Body mass, kg) = 2.6568*Log(MC2, cm) + 0.607                                                                | 0.95  | 26.0                                           | Cervids, Table 16.7; Damuth and MacFadden 1990              |
| Artiodactyla | Cervidae | Odocoileus | sp. | 908    | 3971    | Kincaid Shelter          | Uvalde       | Holocene      | Present study   | ASA                          | cross-sectional area of astragalus    | 3.79 | 2.04 | 72.2                                            | Log(Body mass, g) = 1.463*Log(ASA, mm) + 0.633                                                                  | 0.98  | 33.4                                           | all terrestrial mammals, Table 1; Tsabamoto 2014            |
| Artiodactyla | Cervidae | Odocoileus | sp. | 908    | 1566    | Kincaid Shelter          | Uvalde       | Holocene      | Present study   | ASA                          | cross-sectional area of astragalus    | 3.55 | 2.19 | 72.5                                            | Log(Body mass, g) = 1.463*Log(ASA, mm) + 0.633                                                                  | 0.98  | 33.4                                           | all terrestrial mammals, Table 1; Tsabamoto 2014            |
| Artiodactyla | Cervidae | Odocoileus | sp. | 40618  | 41      | Smith Rockshelter        | Travis       | Holocene      | Present study   | LM1                          | length of first lower molar           | 1.51 | 0.66 | 73.6                                            | Log(Body mass, kg) = 3.334*Log(LM1, cm) + 1.270                                                                 | 0.93  | 23.9                                           | Cervids, Table 16.8; Damuth and MacFadden 1990              |
| Artiodactyla | Cervidae | Odocoileus | sp. | 40618  | 9       | Smith Rockshelter        | Travis       | Holocene      | Present study   | LM3                          | length of third lower molar           | 2.19 | 1.06 | 73.6                                            | Log(Body mass, kg) = 3.143*Log(LM3, cm) + 0.799                                                                 | 0.96  | 19.1                                           | cervids, Table 16.8; Damuth and MacFadden, Janis C.M. 1990. |
| Artiodactyla | Cervidae | Odocoileus | sp. | 908    | 1757    | Kincaid Shelter          | Uvalde       | Holocene      | Present study   | UM                           | length of upper molar                 | 1.65 | 1.50 | 73.9                                            | Log(Body mass, g) = average[3.21*Log(UM1)+1.07, 3.34*Log(UM2)+0.73, 3.29*Log(UM3)+0.8]                          | >0.86 | -50                                            | Selenodont browser, Table 16.9; Damuth and MacFadden 1990   |
| Artiodactyla | Cervidae | Odocoileus | sp. | 908    | 1963    | Kincaid Shelter          | Uvalde       | Pleistocene   | Present study   | Mc                           | distal end of metacarpal              | 2.99 | 1.83 | 74.1                                            | Log(Body mass, kg) = 2.6568*Log(MC2, cm) + 0.607                                                                | 0.95  | 26.0                                           | Cervids, Table 16.7; Damuth and MacFadden 1990              |
| Artiodactyla | Cervidae | Odocoileus | sp. | 908    | 3951    | Kincaid Shelter          | Uvalde       | Holocene      | Present study   | Mc                           | distal end of metacarpal              | 2.99 | 1.91 | 74.4                                            | Log(Body mass, kg) = 2.6568*Log(MC2, cm) + 0.607                                                                | 0.95  | 26.0                                           | Cervids, Table 16.7; Damuth and MacFadden 1990              |
| Artiodactyla | Cervidae | Odocoileus | sp. | 908    | 3946    | Kincaid Shelter          | Uvalde       | Holocene      | Present study   | Mc                           | distal end of metacarpal              | 3.00 | 1.91 | 75.1                                            | Log(Body mass, kg) = 2.6568*Log(MC2, cm) + 0.607                                                                | 0.95  | 26.0                                           | Cervids, Table 16.7; Damuth and MacFadden 1990              |
| Artiodactyla | Cervidae | Odocoileus | sp. | 908    | 2258    | Kincaid Shelter          | Uvalde       | Holocene      | Present study   | ASA                          | cross-sectional area of astragalus    | 3.76 | 2.13 | 76.1                                            | Log(Body mass, g) = 1.463*Log(ASA, mm) + 0.633                                                                  | 0.98  | 33.4                                           | all terrestrial mammals, Table 1; Tsabamoto 2014            |
| Artiodactyla | Cervidae | Odocoileus | sp. | 908    | 3954    | Kincaid Shelter          | Uvalde       | Holocene      | Present study   | Mt                           | distal end of metatarsal              | 2.71 | 1.72 | 76.5                                            | Log(Body mass, g) = 2.9334*Log(Mt2, cm) + 0.6132                                                                | 0.94  | 24.0                                           | Cervids, Table 16.7; Damuth and MacFadden 1990              |
| Artiodactyla | Cervidae | Odocoileus | sp. | 908    | 3970    | Kincaid Shelter          | Uvalde       | Holocene      | Present study   | ASA                          | cross-sectional area of astragalus    | 3.85 | 2.10 | 77.0                                            | Log(Body mass, g) = 1.463*Log(ASA, mm) + 0.633                                                                  | 0.98  | 33.4                                           | all terrestrial mammals, Table 1; Tsabamoto 2014            |
| Artiodactyla | Cervidae | Odocoileus | sp. | 908    | 153     | Kincaid Shelter          | Uvalde       | Holocene      | Present study   | ASA                          | cross-sectional area of astragalus    | 3.77 | 2.15 | 77.2                                            | Log(Body mass, g) = 1.463*Log(ASA, mm) + 0.633                                                                  | 0.98  | 33.4                                           | all terrestrial mammals, Table 1; Tsabamoto 2014            |
| Artiodactyla | Cervidae | Odocoileus | sp. | 40618  | 33      | Smith Rockshelter        | Travis       | Holocene      | Present study   | LM3                          | length of third lower molar           | 2.22 | 0.98 | 77.6                                            | Log(Body mass, kg) = 3.143*Log(LM3, cm) + 0.799                                                                 | 0.96  | 19.1                                           | cervids, Table 16.8; Damuth and MacFadden, Janis C.M. 1990. |
| Artiodactyla | Cervidae | Odocoileus | sp. | 908    | 251     | Kincaid Shelter          | Uvalde       | Holocene      | Present study   | ASA                          | cross-sectional area of astragalus    | 3.65 |      |                                                 |                                                                                                                 |       |                                                |                                                             |

|                     |                 |                               |            |              |                    |                            |                 |                 |                      |                             |                                               |             |             |                                                                                         |                                                                                                                                                                                    |             |                                                |                                                            |
|---------------------|-----------------|-------------------------------|------------|--------------|--------------------|----------------------------|-----------------|-----------------|----------------------|-----------------------------|-----------------------------------------------|-------------|-------------|-----------------------------------------------------------------------------------------|------------------------------------------------------------------------------------------------------------------------------------------------------------------------------------|-------------|------------------------------------------------|------------------------------------------------------------|
| Artiodactyla        | Cervidae        | <i>Odocoileus</i>             | sp.        | 908          | 3953               | Kincaid Shelter            | Uvalde          | Holocene        | Present study        | Mt                          | distal end of metatarsal                      | 2.97        | 2.06        | 99.9                                                                                    | $\text{Log}(\text{Body mass, kg}) = 2.9334 * (\text{log M}2, \text{cm}) + 0.6132$                                                                                                  | 0.94        | 24.0                                           | Cervids, Table 16.7; Damuth and MacFadden 1990             |
| Artiodactyla        | Cervidae        | <i>Odocoileus</i>             | sp.        | 40451        | 157                | Wunderlich site            | Comal           | Holocene        | Present study        | P2                          | length of second upper and lower premolar     | 1.26        | 0.74        | 101.4                                                                                   | $\text{Log}(\text{Body mass, g}) = \text{average}[3.26 * (\text{Log}(\text{UP}2, \text{mm}) + 1.31, 2.75 * (\text{Log}(\text{LP}2) + 2.06]$                                        | 0.81        | 75.0                                           | Selenodont browsers, Table 16.9; Damuth and MacFadden 1990 |
| Artiodactyla        | Cervidae        | <i>Odocoileus</i>             | sp.        | 40544        | 16                 | Sheep Shelter              | Hill            | Holocene        | Present study        | UP                          | length of upper premolar                      | 1.37        | 0.80        | 103.7                                                                                   | $\text{og}(\text{Body mass, g}) = \text{average}[3.26 * (\text{Log}(\text{UP}2, \text{mm}) + 1.31, 3.13 * (\text{Log}(\text{UP}3) + 1.4, 3.05 * (\text{Log}(\text{UP}4) + 1.4]$    | -0.5        |                                                | Selenodont browsers, Table 16.9; Damuth and MacFadden 1990 |
| Artiodactyla        | Cervidae        | <i>Odocoileus</i>             | -999       | -999         | Hearne gravel pits | Robertson                  | Pleistocene     | Present study   | LP1                  | length of first lower molar | 1.69                                          | 0.80        | 106.0       | $\text{Log}(\text{Body mass, kg}) = 3.334 * (\text{Log}(\text{LM}1, \text{cm}) + 1.270$ | 0.93                                                                                                                                                                               | 23.9        | Cervids, Table 16.8; Damuth and MacFadden 1990 |                                                            |
| Artiodactyla        | Cervidae        | <i>Odocoileus</i>             | sp.        | 40544        | -999               | Hearne gravel pits         | Robertson       | Pleistocene     | Present study        | P3                          | length of third premolar                      | 1.48        | 0.74        | 112.3                                                                                   | $\text{Log}(\text{Body mass, g}) = \text{average}[3.13 * (\text{Log}(\text{LP}3, \text{mm}) + 1.4, 3.19 * (\text{Log}(\text{LP}3) + 1.31]$                                         | 0.73        | 73.8                                           | Selenodont browsers, Table 16.9; Damuth and MacFadden 1990 |
| Artiodactyla        | Cervidae        | <i>Odocoileus</i>             | sp.        | 40544        | 56                 | Sheep Shelter              | Hill            | Holocene        | Present study        | UM1?                        | length of third upper molar                   | 1.97        | 0.90        | 113.7                                                                                   | $\text{Log}(\text{Body mass, g}) = 3.29 * (\text{Log}(\text{UM}3, \text{mm}) + 0.80$                                                                                               | 0.93        | 44.7                                           | Selenodont browsers, Table 16.9; Damuth and MacFadden 1990 |
| Artiodactyla        | Cervidae        | <i>Odocoileus</i>             | sp.        | 40544        | 169                | Sheep Shelter              | Hill            | Holocene        | Present study        | LM1                         | length of first lower molar                   | 1.74        | 0.80        | 117.8                                                                                   | $\text{Log}(\text{Body mass, kg}) = 3.334 * (\text{Log}(\text{LM}1, \text{cm}) + 1.270$                                                                                            | 0.93        | 23.9                                           | Cervids, Table 16.8; Damuth and MacFadden 1990             |
| Artiodactyla        | Cervidae        | <i>Odocoileus</i>             | sp.        | 40451        | 97                 | Wunderlich site            | Comal           | Holocene        | Present study        | P2                          | length of second upper and lower premolar     | 1.33        | 0.74        | 118.8                                                                                   | $\text{Log}(\text{Body mass, g}) = \text{average}[3.26 * (\text{Log}(\text{UP}2, \text{mm}) + 1.31, 2.75 * (\text{Log}(\text{LP}2) + 2.06]$                                        | 0.81        | 75.0                                           | Selenodont browsers, Table 16.9; Damuth and MacFadden 1990 |
| Artiodactyla        | Cervidae        | <i>Odocoileus</i>             | sp.        | 40544        | 199                | Sheep Shelter              | Hill            | Holocene        | Present study        | M1                          | length of first lower molar                   | 1.77        | 0.78        | 125.2                                                                                   | $\text{Log}(\text{Body mass, g}) = 3.334 * (\text{Log}(\text{LM}1, \text{cm}) + 1.270$                                                                                             | 0.93        | 23.9                                           | Cervids, Table 16.8; Damuth and MacFadden 1990             |
| Artiodactyla        | Cervidae        | <i>Odocoileus</i>             | sp.        | 908          | 825                | Kincaid Shelter            | Uvalde          | Holocene        | Present study        | M2                          | length of second molar                        | 2.08        | 1.03        | 125.6                                                                                   | $\text{Log}(\text{Body mass, kg}) = \text{average}[3.106 * (\text{Log}(\text{UM}2, \text{cm}) + 1.119, 3.218 * (\text{Log}(\text{LM}2) + 1.073]$                                   | 0.88        | 42.5                                           | Cervids, Table 16.8; Damuth and MacFadden 1990             |
| Artiodactyla        | Cervidae        | <i>Odocoileus</i>             | sp.        | 40451        | 93                 | Wunderlich site            | Comal           | Holocene        | Present study        | P1                          | length of first premolar                      | 1.18        | 1.23        | 126.9                                                                                   | $\text{Log}(\text{Body mass, g}) = 2.89 * (\text{Log}(\text{First Upper Premolar Length, mm UP}1 \text{Length}) + 2.01$                                                            | 0.89        | 80.4                                           | all ungulates, Table 16.9; Damuth and MacFadden 1990       |
| Artiodactyla        | Cervidae        | <i>Odocoileus</i>             | sp.        | 40544        | 165                | Sheep Shelter              | Hill            | Holocene        | Present study        | UM                          | length of upper molar                         | 1.52        | 1.47        | 136.6                                                                                   | $\text{y mass, g}) = \text{average}[3.21 * (\text{Log}(\text{UM}1, \text{mm}) + 1.07, 3.34 * (\text{Log}(\text{UM}2, \text{mm}) + 0.73, 3.29 * (\text{Log}(\text{UM}3, \text{mm})$ | 0.93        | -40                                            | Selenodont browsers, Table 16.9; Damuth and MacFadden 1990 |
| Artiodactyla        | Cervidae        | <i>Odocoileus</i>             | sp.        | 40544        | 43                 | Sheep Shelter              | Hill            | Holocene        | Present study        | UM                          | length of upper molar                         | 1.58        | 0.98        | 154.7                                                                                   | $\text{y mass, g}) = \text{average}[3.21 * (\text{Log}(\text{UM}1, \text{mm}) + 1.07, 3.34 * (\text{Log}(\text{UM}2, \text{mm}) + 0.73, 3.29 * (\text{Log}(\text{UM}3, \text{mm})$ | 0.93        | -40                                            | Selenodont browsers, Table 16.9; Damuth and MacFadden 1990 |
| Artiodactyla        | Cervidae        | <i>Odocoileus</i>             | sp.        | 40451        | 146                | Wunderlich site            | Comal           | Holocene        | Present study        | P1                          | length of first premolar                      | 1.29        | 1.08        | 165.4                                                                                   | $\text{Log}(\text{Body mass, g}) = 2.89 * (\text{Log}(\text{First Upper Premolar Length, mm UP}1 \text{Length}) + 2.01$                                                            | 0.89        | 80.4                                           | all ungulates, Table 16.9; Damuth and MacFadden 1990       |
| Artiodactyla        | Cervidae        | <i>Odocoileus</i>             | sp.        | 40544        | 246                | Sheep Shelter              | Hill            | Holocene        | Present study        | UM1?                        | length of third upper molar                   | 2.26        | 1.03        | 179.1                                                                                   | $\text{Log}(\text{Body mass, g}) = 3.29 * (\text{Log}(\text{UM}3, \text{mm}) + 0.80$                                                                                               | 0.93        | 44.7                                           | Selenodont browsers, Table 16.9; Damuth and MacFadden 1990 |
| <b>Artiodactyla</b> | <b>Cervidae</b> | <b><i>Odocoileus</i></b>      | <b>sp.</b> | <b>40544</b> | <b>288</b>         | <b>Sheep Shelter</b>       | <b>Hill</b>     | <b>Holocene</b> | <b>Present study</b> | <b>LP</b>                   | <b>length of third upper molar</b>            | <b>1.43</b> | <b>0.90</b> | <b>271.3</b>                                                                            | <b>g(Body mass, kg) = average[3.619 * Log(LP2, cm) + 1.885, 3.399 * Log(LP3) + 1.556, 3.13 * Log(LP1</b>                                                                           | <b>0.87</b> | <b>33.0</b>                                    | <b>Cervids, Table 16.8; Damuth and MacFadden 1990</b>      |
| Artiodactyla        | Cervidae        | <i>Odocoileus</i>             | sp.        | 908          | 2255               | Kincaid Shelter            | Uvalde          | Holocene        | Present study        | Thoracic vertebra           | thoracic vertebra                             | 3.30        | 5.38        |                                                                                         | no equation for thoracic vertebrae measurements found                                                                                                                              |             |                                                |                                                            |
| Artiodactyla        | Cervidae        | <i>indet.</i>                 | sp.        | 988          | 100                | Scharbauer Ranch           | Midland         | Pleistocene     | Present study        | ASA                         | cross-sectional area of astragalus            | 3.60        | 2.03        | 66.4                                                                                    | $\text{Log}(\text{Body mass, g}) = 1.463 * (\text{Log}(\text{ASA, mm}) + 0.633$                                                                                                    | 0.98        | 33.4                                           | all terrestrial mammals, Table 1; Tsabamoto 2014           |
| Artiodactyla        | Suidae          | <i>Sus scrofa</i>             |            | 40540        | -999               | Miller's Cave              | Llano           | Holocene?       | Present study        | UM1                         | length of first upper molar                   | 1.25        | 1.04        | 33.1                                                                                    | $\text{Log}(\text{Body mass, g}) = 3.11 * (\text{Log}(\text{UM}1, \text{mm}) + 1.11$                                                                                               | 0.97        | 34.6                                           | non-selenodonts, Table 16.8; Damuth and MacFadden 1990     |
| Artiodactyla        | Tayassuidae     | <i>Mylodon nasutus</i>        |            | 933          | 3011               | Friesenhahn cave           | Bezar           | Pleistocene     | Present study        | UM1                         | length of first upper molar                   | 1.13        | 1.24        | 24.3                                                                                    | $\text{Log}(\text{Body mass, g}) = 3.11 * (\text{Log}(\text{UM}1, \text{mm}) + 1.11$                                                                                               | 0.97        | 34.6                                           | non-selenodonts, Table 16.8; Damuth and MacFadden 1990     |
| Artiodactyla        | Tayassuidae     | <i>Mylodon nasutus</i>        |            | 933          | 3396               | Friesenhahn cave           | Bezar           | Pleistocene     | Present study        | Mt                          | distal end of metatarsal                      | 0.92        | 1.18        | 27.9                                                                                    | $\text{Log}(\text{Body mass, kg}) = 2.9934 * (\text{log M}2, \text{cm}) + 1.23$                                                                                                    | 0.92        | 19.0                                           | Suids, Table 16.7; Damuth and MacFadden 1990               |
| Artiodactyla        | Tayassuidae     | <i>Mylodon nasutus</i>        |            | 933          | 3488               | Friesenhahn cave           | Bezar           | Pleistocene     | Present study        | Mt                          | distal end of metatarsal                      | 0.87        | 1.24        | 32.0                                                                                    | $\text{Log}(\text{Body mass, kg}) = 2.9934 * (\text{log M}2, \text{cm}) + 1.23$                                                                                                    | 0.92        | 19.0                                           | Suids, Table 16.7; Damuth and MacFadden 1990               |
| Artiodactyla        | Tayassuidae     | <i>Mylodon nasutus</i>        |            | 933          | 3402               | Friesenhahn cave           | Bezar           | Pleistocene     | Present study        | UM2                         | length of second upper molar                  | 1.73        | 1.60        | 56.8                                                                                    | $\text{Log}(\text{Body mass, g}) = 2.96 * (\text{Log}(\text{UM}2, \text{mm}) + 1.09$                                                                                               | 0.95        | 42.2                                           | Non-selenodonts, Table 16.9; Damuth and MacFadden 1990     |
| Artiodactyla        | Tayassuidae     | <i>Mylodon nasutus</i>        |            | 933          | 3462               | Friesenhahn cave           | Bezar           | Pleistocene     | Present study        | UM2                         | length of second upper molar                  | 1.78        | 1.59        | 61.6                                                                                    | $\text{Log}(\text{Body mass, g}) = 2.96 * (\text{Log}(\text{UM}2, \text{mm}) + 1.09$                                                                                               | 0.95        | 42.2                                           | Non-selenodonts, Table 16.9; Damuth and MacFadden 1990     |
| Artiodactyla        | Tayassuidae     | <i>Mylodon nasutus</i>        |            | 933          | 3360               | Friesenhahn cave           | Bezar           | Pleistocene     | Present study        | LM1                         | length of first lower molar                   | 1.40        | 1.26        | 65.1                                                                                    | $\text{Log}(\text{Body mass, kg}) = 3.263 * (\text{Log}(\text{LM}1, \text{cm}) + 1.337$                                                                                            | 0.93        | 34.6                                           | all ungulates, Table 16.8; Damuth and MacFadden 1990       |
| Artiodactyla        | Tayassuidae     | <i>Mylodon nasutus</i>        |            | 933          | 3401               | Friesenhahn cave           | Bezar           | Pleistocene     | Present study        | UM1                         | length of first upper molar                   | 1.57        | 1.48        | 67.5                                                                                    | $\text{Log}(\text{Body mass, g}) = 3.11 * (\text{Log}(\text{UM}1, \text{mm}) + 1.11$                                                                                               | 0.97        | 34.6                                           | non-selenodonts, Table 16.8; Damuth and MacFadden 1990     |
| Artiodactyla        | Tayassuidae     | <i>Mylodon nasutus</i>        |            | 933          | 1905               | Friesenhahn cave           | Bezar           | Pleistocene     | Present study        | LM1                         | length of first lower molar                   | 1.42        | 1.28        | 68.2                                                                                    | $\text{Log}(\text{Body mass, kg}) = 3.263 * (\text{Log}(\text{LM}1, \text{cm}) + 1.337$                                                                                            | 0.93        | 34.6                                           | all ungulates, Table 16.8; Damuth and MacFadden 1990       |
| Artiodactyla        | Tayassuidae     | <i>Mylodon nasutus</i>        |            | 933          | 3581               | Friesenhahn cave           | Bezar           | Pleistocene     | Present study        | LM1                         | length of first lower molar                   | 1.88        | 1.44        | 69.3                                                                                    | $\text{Log}(\text{Body mass, kg}) = 2.63 * (\text{Log}(\text{LM}3, \text{mm}) + 1.49$                                                                                              | 0.88        | 64.1                                           | Non-selenodonts, Table 16.9; Damuth and MacFadden 1990     |
| Artiodactyla        | Tayassuidae     | <i>Mylodon nasutus</i>        |            | 933          | 4342               | Friesenhahn cave           | Bezar           | Pleistocene     | Present study        | UM1                         | length of first upper molar                   | 1.69        | 1.39        | 84.9                                                                                    | $\text{Log}(\text{Body mass, g}) = 3.11 * (\text{Log}(\text{UM}1, \text{mm}) + 1.11$                                                                                               | 0.97        | 34.6                                           | non-selenodonts, Table 16.8; Damuth and MacFadden 1990     |
| Artiodactyla        | Tayassuidae     | <i>Mylodon nasutus</i>        |            | 933          | 72                 | Friesenhahn cave           | Bezar           | Pleistocene     | Present study        | UM1                         | length of first upper molar                   | 1.74        | 1.35        | 82.0                                                                                    | $\text{Log}(\text{Body mass, g}) = 3.11 * (\text{Log}(\text{UM}1, \text{mm}) + 1.11$                                                                                               | 0.97        | 34.6                                           | non-selenodonts, Table 16.8; Damuth and MacFadden 1990     |
| Artiodactyla        | Tayassuidae     | <i>Mylodon nasutus</i>        |            | 933          | 1350               | Friesenhahn cave           | Bezar           | Pleistocene     | Present study        | LM3                         | length of third lower molar                   | 2.28        | 1.41        | 99.0                                                                                    | $\text{Log}(\text{Body mass, g}) = 2.81 * (\text{Log}(\text{LM}3, \text{mm}) + 1.18$                                                                                               | 0.89        | 65.5                                           | non-selenodonts, Table 16.9; Damuth and MacFadden 1990     |
| Artiodactyla        | Tayassuidae     | <i>Mylodon nasutus</i>        |            | 933          | 2322               | Friesenhahn cave           | Bezar           | Pleistocene     | Present study        | LM3                         | length of third lower molar                   | 2.33        | 1.21        | 105.3                                                                                   | $\text{Log}(\text{Body mass, g}) = 2.81 * (\text{Log}(\text{LM}3, \text{mm}) + 1.18$                                                                                               | 0.89        | 65.5                                           | non-selenodonts, Table 16.9; Damuth and MacFadden 1990     |
| Artiodactyla        | Tayassuidae     | <i>Mylodon nasutus</i>        |            | 933          | 2106               | Friesenhahn cave           | Bezar           | Pleistocene     | Present study        | LM1                         | length of first lower molar                   | 1.63        | 0.95        | 107.0                                                                                   | $\text{Log}(\text{Body mass, kg}) = 3.263 * (\text{Log}(\text{LM}1, \text{cm}) + 1.337$                                                                                            | 0.93        | 34.6                                           | all ungulates, Table 16.8; Damuth and MacFadden 1990       |
| Artiodactyla        | Tayassuidae     | <i>Mylodon nasutus</i>        |            | 933          | 2107               | Friesenhahn cave           | Bezar           | Pleistocene     | Present study        | LM1                         | length of first lower molar                   | 1.70        | 0.94        | 122.0                                                                                   | $\text{Log}(\text{Body mass, kg}) = 3.263 * (\text{Log}(\text{LM}1, \text{cm}) + 1.337$                                                                                            | 0.93        | 34.6                                           | all ungulates, Table 16.8; Damuth and MacFadden 1990       |
| Artiodactyla        | Tayassuidae     | <i>Pecari tajacu</i>          |            | 40685        | 1                  | Zesch Cave                 | Mason           | Pleistocene     | Present study        | UM1                         | length of first upper molar                   | 1.22        | 1.11        | 30.7                                                                                    | $\text{Log}(\text{Body mass, g}) = 3.11 * (\text{Log}(\text{UM}1, \text{mm}) + 1.11$                                                                                               | 0.97        | 34.6                                           | non-selenodonts, Table 16.8; Damuth and MacFadden 1990     |
| Artiodactyla        | Tayassuidae     | <i>Pecari tajacu</i>          |            | 41064        | 1                  | Leon River Shelter         | Coryell         | Pleistocene     | Present study        | LP4                         | length of fourth lower premolar               | 1.19        | 0.90        | 31.6                                                                                    | $\text{Log}(\text{Body mass, g}) = 3.11 * (\text{Log}(\text{LP}4, \text{mm}) + 1.15$                                                                                               | 0.97        | 32.3                                           | non-selenodonts, Table 16.8; Damuth and MacFadden 1990     |
| Artiodactyla        | Tayassuidae     | <i>Platytropus compressus</i> |            | 998          | 31                 | Scharbauer Ranch           | Midland         | Pleistocene     | Present study        | UM1                         | length of first upper molar                   | 1.36        | 1.14        | 42.8                                                                                    | $\text{Log}(\text{Body mass, g}) = 3.11 * (\text{Log}(\text{UM}1, \text{mm}) + 1.11$                                                                                               | 0.97        | 34.6                                           | non-selenodonts, Table 16.8; Damuth and MacFadden 1990     |
| Artiodactyla        | Tayassuidae     | <i>Platytropus compressus</i> |            | 41229        | 1364               | Hill's Cave                | Kerr            | Pleistocene     | Present study        | LM2                         | length of second lower molar                  | 1.48        | 1.04        | 47.2                                                                                    | $\text{Log}(\text{Body mass, kg}) = 3.201 * (\text{Log}(\text{LM}2, \text{cm}) + 1.13$                                                                                             | 0.94        | 31.1                                           | Ungulates, Table 16.8; Damuth and MacFadden 1990           |
| Artiodactyla        | Tayassuidae     | <i>Platytropus compressus</i> |            | 30607        | 1036               | Ingleside                  | San Patricio    | Pleistocene     | Present study        | UM1                         | length of first upper molar                   | 1.48        | 1.46        | 56.6                                                                                    | $\text{Log}(\text{Body mass, g}) = 3.11 * (\text{Log}(\text{UM}1, \text{mm}) + 1.11$                                                                                               | 0.97        | 34.6                                           | non-selenodonts, Table 16.8; Damuth and MacFadden 1990     |
| Artiodactyla        | Tayassuidae     | <i>Platytropus compressus</i> |            | 998          | 228                | Scharbauer Ranch           | Midland         | Pleistocene     | Present study        | LM1                         | length of first lower molar                   | 1.41        | 1.17        | 65.9                                                                                    | $\text{Log}(\text{Body mass, kg}) = 3.263 * (\text{Log}(\text{LM}1, \text{cm}) + 1.337$                                                                                            | 0.93        | 34.6                                           | all ungulates, Table 16.8; Damuth and MacFadden 1990       |
| Artiodactyla        | Tayassuidae     | <i>Platytropus compressus</i> |            | 2271         | 2400               | Cameron (Carry Gravel Pit) | Milam           | Pleistocene     | Present study        | LM2                         | length of second lower molar                  | 1.70        | 1.34        | 74.3                                                                                    | $\text{Log}(\text{Body mass, kg}) = 3.201 * (\text{Log}(\text{LM}2, \text{cm}) + 1.13$                                                                                             | 0.94        | 31.1                                           | Ungulates, Table 16.8; Damuth and MacFadden 1990           |
| Artiodactyla        | Tayassuidae     | <i>Platytropus compressus</i> |            | 2271         | 2400               | Cameron (Carry Gravel Pit) | Milam           | Pleistocene     | Present study        | LM3                         | length of third lower molar                   | 2.19        | 1.29        | 88.9                                                                                    | $\text{Log}(\text{Body mass, g}) = 2.81 * (\text{Log}(\text{LM}3, \text{mm}) + 1.18$                                                                                               | 0.89        | 65.5                                           | non-selenodonts, Table 16.9; Damuth and MacFadden 1990     |
| Artiodactyla        | Tayassuidae     | <i>Platytropus compressus</i> |            | 30607        | 1646               | Ingleside                  | San Patricio    | Pleistocene     | Present study        | UM2                         | length of second lower molar                  | 1.83        | 1.39        | 90.3                                                                                    | $\text{Log}(\text{Body mass, kg}) = 3.201 * (\text{Log}(\text{LM}2, \text{cm}) + 1.13$                                                                                             | 0.94        | 31.1                                           | Ungulates, Table 16.8; Damuth and MacFadden 1990           |
| Artiodactyla        | Tayassuidae     | <i>Platytropus compressus</i> |            | 937          | 200                | Blackwater Draw            | near Portal, ND | Pleistocene     | Present study        | LM3                         | length of third lower molar                   | 2.29        | 1.40        | 103.3                                                                                   | $\text{Log}(\text{Body mass, g}) = 2.81 * (\text{Log}(\text{LM}3, \text{mm}) + 1.18$                                                                                               | 0.89        | 65.5                                           | non-selenodonts, Table 16.9; Damuth and MacFadden 1990     |
| Artiodactyla        | Tayassuidae     | <i>Platytropus compressus</i> |            | 30607        | 707                | Ingleside                  | San Patricio    | Pleistocene     | Present study        | UM3                         | length of third upper molar                   | 2.19        | 1.80        | 104.1                                                                                   | $\text{Log}(\text{Body mass, g}) = 2.63 * (\text{Log}(\text{UM}3, \text{mm}) + 1.49$                                                                                               | 0.88        | 64.1                                           | Non-selenodonts, Table 16.9; Damuth and MacFadden 1990     |
| Artiodactyla        | Tayassuidae     | <i>Platytropus compressus</i> |            | 933          | 3958               | Friesenhahn cave           | Bezar           | Pleistocene     | Present study        | LM3                         | length of third lower molar                   | 2.62        | 1.38        | 145.9                                                                                   | $\text{Log}(\text{Body mass, g}) = 2.81 * (\text{Log}(\text{LM}3, \text{mm}) + 1.18$                                                                                               | 0.89        | 65.5                                           | non-selenodonts, Table 16.9; Damuth and MacFadden 1990     |
| Artiodactyla        | Tayassuidae     | <i>Platytropus compressus</i> |            | 933          | 895                | Friesenhahn cave           | Bezar           | Pleistocene     | Present study        | HuEB                        | distal end; breadth of epicondyles of humerus | 3.96        | 3.91        | 68.3                                                                                    | $\text{Log}(\text{Body mass, kg}) = 2.6454 * (\text{Log}(\text{HuEB}, \text{cm}) + 0.2538$                                                                                         | 0.96        | 19.0                                           | Artiodactyla, Table 16.7; Damuth and MacFadden 1990        |
| Artiodactyla        | Tayassuidae     | <i>Platytropus compressus</i> |            | 933          | 1352               | Friesenhahn cave           | Bezar           | Pleistocene     | Present study        | HuEB                        | distal end; breadth of epicondyles of humerus | 4.01        | 3.82        | 70.6                                                                                    | $\text{Log}(\text{Body mass, kg}) = 2.6454 * (\text{Log}(\text{HuEB}, \text{cm}) + 0.2538$                                                                                         | 0.96        | 19.0                                           | Artiodactyla, Table 16.7; Damuth and MacFadden 1990        |
| Artiodactyla        | Tayassuidae     |                               |            |              |                    |                            |                 |                 |                      |                             |                                               |             |             |                                                                                         |                                                                                                                                                                                    |             |                                                |                                                            |















|           |            |                   |                   |       |       |                                  |              |               |                 |        |                                                         |   |       |       |       |  |                                                                                    |      |      |                                                   |
|-----------|------------|-------------------|-------------------|-------|-------|----------------------------------|--------------|---------------|-----------------|--------|---------------------------------------------------------|---|-------|-------|-------|--|------------------------------------------------------------------------------------|------|------|---------------------------------------------------|
| Carnivora | Felidae    | <i>Panthera</i>   | <i>leo atrox</i>  | 43059 | 907   | Wight Materials North (Bluntzer) |              | Pleistocene   | Present study   | LM1    | length of first lower molar                             | R | 2.78  | 1.34  | 180.0 |  | $\text{Log}(\text{Body mass, g}) = 3.05^* \text{Log}(\text{LM1, mm}) - 2.15$       | 0.90 | 28.0 | Table 10.2 Felid regression; Van Valkenburgh 1990 |
| Carnivora | Felidae    | <i>Panthera</i>   | <i>leo atrox</i>  | 30967 | 1697  | Ingleside                        | San Patricio | Pleistocene   | Present study   | UP3    | third upper premolar                                    | R | 2.89  | 1.30  | 217.1 |  | $\text{Log}(\text{Body mass, g}) = 3.0129^* \text{Log}(\text{LP4, mm}) + 0.9356$   | 0.94 | na   | Felids, Present study (LP4-LP3, but TUP4)         |
| Carnivora | Felidae    | <i>Panthera</i>   | <i>leo atrox</i>  | 43059 | 908   |                                  |              | Pleistocene   | Present study   | LM1    | length of first lower molar                             | L | 3.09  | 1.52  | 247.7 |  | $\text{Log}(\text{Body mass, g}) = 3.05^* \text{Log}(\text{LM1, mm}) - 2.15$       | 0.90 | 28.0 | Table 10.2 Felid regression; Van Valkenburgh 1990 |
| Carnivora | Felidae    | <i>Panthera</i>   | <i>leo atrox</i>  | 908   | 2418  | Kincaid Shelter                  | Uvalde       | Pleistocene   | Present study   | Canine | UCL                                                     |   | 12.40 | 2.16  |       |  |                                                                                    |      |      |                                                   |
| Carnivora | Felidae    | <i>Panthera</i>   | <i>onca</i>       | 40379 | 121   | Lorchong Cave                    | Burnet       | Pleistocene   | Present study   | FeB    | distal end, breadth of epicondyles of femur             | R | 5.63  | 5.01  | 74.4  |  | $\text{Log}(\text{Body mass, g}) = 2.79^* \text{Log}(\text{FeB, mm}) + -0.006$     | 0.94 | na   | Present study                                     |
| Carnivora | Felidae    | <i>Panthera</i>   | <i>onca</i>       | 43407 | 311   | Honey Creek Cave                 | Mason        | Pleistocene   | Present study   | LM1    | length of first lower molar                             | R | 2.23  | 1.04  | 91.9  |  | $\text{Log}(\text{Body mass, g}) = 3.05^* \text{Log}(\text{LM1, mm}) - 2.15$       | 0.90 | 28.0 | Table 10.2 Felid regression; Van Valkenburgh 1990 |
| Carnivora | Felidae    | <i>Panthera</i>   | <i>onca</i>       | 40379 | 131   | Lorchong Cave                    | Burnet       | Pleistocene   | Present study   | LM1    | length of first lower molar                             | R | 2.36  | 1.03  | 109.3 |  | $\text{Log}(\text{Body mass, g}) = 3.05^* \text{Log}(\text{LM1, mm}) - 2.15$       | 0.90 | 28.0 | Table 10.2 Felid regression; Van Valkenburgh 1990 |
| Carnivora | Felidae    | <i>Stimulodon</i> | <i>fatalis</i>    | 30967 | 751   | Ingleside                        | San Patricio | Pleistocene   | Present study   | UP4    | length of fourth upper premolar                         | R | 1.41  | 0.78  | 24.9  |  | $\text{Log}(\text{Body mass, g}) = 3.01^* \text{Log}(\text{LP4, mm}) + 0.936$      | 0.94 | na   | Felids, Present study                             |
| Carnivora | Felidae    | <i>Stimulodon</i> | <i>fatalis</i>    | 933   | 898   | Friessenhahn cave                | Bezar        | Pleistocene   | Present study   | LP4    | length of fourth lower premolar                         | L | 2.22  | 1.05  | 98.6  |  | $\text{Log}(\text{Body mass, g}) = 3.01^* \text{Log}(\text{LP4, mm}) + 0.936$      | 0.94 | na   | Felids, Present study                             |
| Carnivora | Felidae    | <i>Stimulodon</i> | <i>fatalis</i>    | 933   | 897   | Friessenhahn cave                | Bezar        | Pleistocene   | Present study   | LM1    | length of first lower molar                             | R | 2.50  | 1.18  | 128.9 |  | $\text{Log}(\text{Body mass, g}) = 3.05^* \text{Log}(\text{LM1, mm}) - 2.15$       | 0.90 | 28.0 | Table 10.2 Felid regression; Van Valkenburgh 1990 |
| Carnivora | Felidae    | <i>Stimulodon</i> | <i>fatalis</i>    | 933   | 1314  | Friessenhahn cave                | Bezar        | Pleistocene   | Present study   | LM1    | length of first lower molar                             | V | 2.50  | 1.30  | 136.6 |  | $\text{Log}(\text{Body mass, g}) = 3.05^* \text{Log}(\text{LM1, mm}) - 2.15$       | 0.90 | 28.0 | Table 10.2 Felid regression; Van Valkenburgh 1990 |
| Carnivora | Felidae    | <i>Stimulodon</i> | <i>fatalis</i>    | 933   | 373   | Friessenhahn cave                | Bezar        | Pleistocene   | Present study   | FeB    | distal end, breadth of epicondyles of femur             | L | 7.01  | 6.30  | 137.3 |  | $\text{Log}(\text{Body mass, g}) = 2.79^* \text{Log}(\text{FeB, mm}) + -0.006$     | 0.94 | na   | Present study                                     |
| Carnivora | Felidae    | <i>Stimulodon</i> | <i>fatalis</i>    | 933   | 68    | Friessenhahn cave                | Bezar        | Pleistocene   | Present study   | LP4    | length of fourth lower premolar                         | R | 2.49  | 1.14  | 136.1 |  | $\text{Log}(\text{Body mass, g}) = 3.01^* \text{Log}(\text{LP4, mm}) + 0.936$      | 0.94 | na   | Felids, Present study                             |
| Carnivora | Felidae    | <i>Stimulodon</i> | <i>fatalis</i>    | 43059 | 304   | Wight Materials North            |              | Pleistocene   | Present study   | Hm/APD | midshaft anteroposterior diameter of humerus            | R | 3.28  | 2.60  | 117   |  | $\text{Log}(\text{Body mass, g}) = 2.59^* \text{Log}(\text{Hm, mm}) + 1.21$        | 0.94 | na   | Present study                                     |
| Carnivora | Felidae    | <i>Stimulodon</i> | <i>fatalis</i>    | 30967 | 158   | Ingleside                        | San Patricio | Pleistocene   | Present study   | LP     | length of lower premolar                                | R | 2.60  | 1.17  | 157.9 |  | $\text{Log}(\text{Body mass, g}) = 3.04^* \text{Log}(\text{LP4, mm}) + 0.936$      | 0.94 | na   | Felids, Present study                             |
| Carnivora | Felidae    | <i>Stimulodon</i> | <i>fatalis</i>    | 30967 | 158   | Ingleside                        | San Patricio | Pleistocene   | Present study   | LM1    | length of first lower molar                             | R | 2.73  | 1.15  | 198.8 |  | $\text{Log}(\text{Body mass, g}) = 3.05^* \text{Log}(\text{LM1, mm}) - 2.15$       | 0.90 | 28.0 | Table 10.2 Felid regression; Van Valkenburgh 1990 |
| Carnivora | Felidae    | <i>Stimulodon</i> | <i>fatalis</i>    | 933   | 574   | Friessenhahn cave                | Bezar        | Pleistocene   | Present study   | HueB   | distal end, breadth of epicondyles of humerus           | L | 7.63  | 4.87  | 253.5 |  | $\text{Log}(\text{Body mass, kg}) = 2.198^* \text{Log}(\text{HueB, mm}) + 1.711$   | 0.95 | 21.0 | Christman and Harris 2005                         |
| Carnivora | Felidae    | <i>Stimulodon</i> | <i>fatalis</i>    | 933   | 226   | Friessenhahn cave                | Bezar        | Pleistocene   | Present study   | HueB   | distal end, breadth of epicondyles of humerus           | L | 8.26  | 4.95  | 301.7 |  | $\text{Log}(\text{Body mass, kg}) = 2.198^* \text{Log}(\text{HueB, mm}) + 1.711$   | 0.95 | 21.0 | Christman and Harris 2005                         |
| Carnivora | Felidae    | <i>Stimulodon</i> | <i>fatalis</i>    | 933   | 2933  | Friessenhahn cave                | Bezar        | Pleistocene   | Present study   | HueB   | distal end, breadth of epicondyles of humerus           | L | 9.48  | 4.13  | 407.4 |  | $\text{Log}(\text{Body mass, kg}) = 2.198^* \text{Log}(\text{HueB, mm}) + 1.711$   | 0.95 | 21.0 | Christman and Harris 2005                         |
| Carnivora | Felidae    | <i>Stimulodon</i> | <i>fatalis</i>    | 933   | 2690  | Friessenhahn cave                | Bezar        | Pleistocene   | Present study   | UP4    | length of fourth upper premolar                         | R | 3.75  | 1.38  | 167.7 |  | $\text{Log}(\text{Body mass, g}) = 3.05^* \text{Log}(\text{LM1, mm}) - 2.15$       | 0.90 | 28.0 | Table 10.2 Felid regression; Van Valkenburgh 1990 |
| Carnivora | Felidae    | <i>Stimulodon</i> | <i>fatalis</i>    | 908   | 2691  | Kincaid Shelter                  | Uvalde       | Pleistocene   | Present study   | UP4    | length of fourth upper premolar                         | R | 3.80  | 1.47  | 174.9 |  | $\text{Log}(\text{Body mass, g}) = 3.05^* \text{Log}(\text{LM1, mm}) - 2.15$       | 0.90 | 28.0 | Table 10.2 Felid regression; Van Valkenburgh 1990 |
| Carnivora | Felidae    | <i>Stimulodon</i> | <i>fatalis</i>    | 933   | 3956  | Friessenhahn cave                | Bezar        | Pleistocene   | Present study   | UP4    | length of fourth upper premolar                         | R | 3.93  | 1.33  | 193.5 |  | $\text{Log}(\text{Body mass, g}) = 3.05^* \text{Log}(\text{LM1, mm}) - 2.15$       | 0.90 | 28.0 | Table 10.2 Felid regression; Van Valkenburgh 1990 |
| Carnivora | Felidae    | <i>Stimulodon</i> | <i>fatalis</i>    | 30967 | 1713  | Ingleside                        | San Patricio | Pleistocene   | Lundelius 1972b | RaL    | anster at midshaft; overall length, width at distal end | L | 3.80  | 26.70 | 6.10  |  |                                                                                    |      |      |                                                   |
| Carnivora | indet.     | <i>indet.</i>     | <i>indet.</i>     | 41259 | none  | Hall's Cave                      | Kerr         | Holocene      | Present study   | FeHD   | proximal end; diameter of femoral head                  | L | 1.51  |       |       |  | $\text{Log}(\text{Body mass, g}) = 2.7^* \text{Log}(\text{FeHD, mm}) + 0.75$       | 0.99 | 11.3 | Pardi 2016                                        |
| Carnivora | indet.     | <i>indet.</i>     | <i>indet.</i>     | 41259 | none  | Hall's Cave                      | Kerr         | Pleistocene   | Present study   | FeHD   | proximal end; diameter of femoral head                  | R | 1.51  |       |       |  | $\text{Log}(\text{Body mass, g}) = 2.7^* \text{Log}(\text{FeHD, mm}) + 0.75$       | 0.99 | 11.3 | Pardi 2016                                        |
| Carnivora | Mephitidae | <i>Conopatus</i>  | <i>mesoleucus</i> | 43133 | 1137  | Bering Sinkhole                  | Kerr         | Holocene      | Present study   | LM1    | length of first lower molar                             | L | 0.99  | 0.49  | 2.3   |  | $\text{Log}(\text{Body mass, g}) = 3.4287^* \text{Log}(\text{LM1, mm}) - 0.5316$   | 0.81 |      | Present study                                     |
| Carnivora | Mephitidae | <i>Conopatus</i>  | <i>mesoleucus</i> | 43133 | 1138  | Bering Sinkhole                  | Kerr         | Holocene      | Present study   | LM1    | length of first lower molar                             | R | 1.09  | 0.43  | 3.3   |  | $\text{Log}(\text{Body mass, g}) = 3.4287^* \text{Log}(\text{LM1, mm}) - 0.5316$   | 0.81 |      | Present study                                     |
| Carnivora | Mephitidae | <i>Mephitis</i>   | <i>mephitis</i>   | 40540 | 71    | Miller's Cave                    | Llano        | Pleistocene   | Present study   | LM1    | length of first lower molar                             | L | 0.49  | 0.46  | 0.1   |  | $\text{Log}(\text{Body mass, g}) = 3.4287^* \text{Log}(\text{LM1, mm}) - 0.5316$   | 0.81 |      | all carnivores, Present study                     |
| Carnivora | Mephitidae | <i>Mephitis</i>   | <i>mephitis</i>   | M     | 367   | Unknown                          | Unknown      | Modern        | Present study   | UM1    | length of first upper molar                             | R | 0.72  |       | 0.7   |  | $\text{Log}(\text{Body mass, g}) = 3.4287^* \text{Log}(\text{LM1, mm}) - 0.5316$   | 0.81 |      | all carnivores, Present Study                     |
| Carnivora | Mephitidae | <i>Mephitis</i>   | <i>mephitis</i>   | M     | 2034  | 5 mi west of Austin              | Modern       | Present study |                 | LM1    | length of first lower molar                             | L | 0.83  |       | 1.1   |  | $\text{Log}(\text{Body mass, g}) = 3.4287^* \text{Log}(\text{LM1, mm}) - 0.5316$   | 0.81 |      | all carnivores, Present Study                     |
| Carnivora | Mephitidae | <i>Mephitis</i>   | <i>mephitis</i>   | M     | 2034  | 5 mi west of Austin              | Modern       | Present study |                 | SKL    | length of skull                                         | ? | 6.40  |       | 1.2   |  | $\text{Log}(\text{Body mass, kg}) = 3.39^* \text{Log}(\text{SKL, mm}) + -6.03$     | 0.90 | 40.0 | Mustelids, Table 16.6; Damuth and MacFadden 1990  |
| Carnivora | Mephitidae | <i>Mephitis</i>   | <i>mephitis</i>   | M     | 493   | Unknown                          | Modern       | Present study |                 | SKL    | length of skull                                         | ? | 6.46  |       | 1.3   |  | $\text{Log}(\text{Body mass, kg}) = 3.39^* \text{Log}(\text{SKL, mm}) + -6.03$     | 0.90 | 40.0 | Mustelids, Table 16.6; Damuth and MacFadden 1990  |
| Carnivora | Mephitidae | <i>Mephitis</i>   | <i>mephitis</i>   | M     | 367   | Pease Park                       | Modern       | Present study |                 | SKL    | length of skull                                         | ? | 6.50  |       | 1.3   |  | $\text{Log}(\text{Body mass, kg}) = 3.39^* \text{Log}(\text{SKL, mm}) + -6.03$     | 0.90 | 40.0 | Mustelids, Table 16.6; Damuth and MacFadden 1990  |
| Carnivora | Mephitidae | <i>Mephitis</i>   | <i>mephitis</i>   | M     | 495   | Pease Park                       | Modern       | Present study |                 | LM1    | length of first lower molar                             | L | 0.69  |       | 1.4   |  | $\text{Log}(\text{Body mass, g}) = 3.4287^* \text{Log}(\text{LM1, mm}) - 0.5316$   | 0.81 |      | all carnivores, Present Study                     |
| Carnivora | Mephitidae | <i>Mephitis</i>   | <i>mephitis</i>   | M     | 495   | Pease Park                       | Modern       | Present study |                 | SKL    | length of skull                                         | ? | 6.87  |       | 1.4   |  | $\text{Log}(\text{Body mass, kg}) = 3.39^* \text{Log}(\text{SKL, mm}) + -6.03$     | 0.90 | 40.0 | Mustelids, Table 16.6; Damuth and MacFadden 1990  |
| Carnivora | Mephitidae | <i>Mephitis</i>   | <i>mephitis</i>   | M     | 7312  | Pease Park                       | Modern       | Present study |                 | SKL    | length of skull                                         | ? | 6.85  |       | 1.6   |  | $\text{Log}(\text{Body mass, kg}) = 3.39^* \text{Log}(\text{SKL, mm}) + -6.03$     | 0.90 | 40.0 | Mustelids, Table 16.6; Damuth and MacFadden 1990  |
| Carnivora | Mephitidae | <i>Mephitis</i>   | <i>mephitis</i>   | M     | 7312  | Stucones Researc Center,         | Travis       | Modern        | Present study   | LM1    | length of first lower molar                             | L | 0.90  |       | 1.6   |  | $\text{Log}(\text{Body mass, g}) = 3.4287^* \text{Log}(\text{LM1, mm}) - 0.5316$   | 0.81 |      | all carnivores, Present Study                     |
| Carnivora | Mephitidae | <i>Mephitis</i>   | <i>mephitis</i>   | M     | 343   | Unknown                          | Modern       | Present study |                 | LM1    | length of first lower molar                             | L | 0.91  |       | 1.7   |  | $\text{Log}(\text{Body mass, g}) = 3.4287^* \text{Log}(\text{LM1, mm}) - 0.5316$   | 0.81 |      | all carnivores, Present Study                     |
| Carnivora | Mephitidae | <i>Mephitis</i>   | <i>mephitis</i>   | M     | 494   | Pease Park                       | Modern       | Present study |                 | LM1    | length of first lower molar                             | L | 0.91  |       | 1.7   |  | $\text{Log}(\text{Body mass, g}) = 3.4287^* \text{Log}(\text{LM1, mm}) - 0.5316$   | 0.81 |      | all carnivores, Present Study                     |
| Carnivora | Mephitidae | <i>Mephitis</i>   | <i>mephitis</i>   | M     | 494   | Pease Park                       | Modern       | Present study |                 | SKL    | length of skull                                         | ? | 7.14  |       | 1.7   |  | $\text{Log}(\text{Body mass, kg}) = 3.39^* \text{Log}(\text{SKL, mm}) + -6.03$     | 0.90 | 40.0 | Mustelids, Table 16.6; Damuth and MacFadden 1990  |
| Carnivora | Mephitidae | <i>Mephitis</i>   | <i>mephitis</i>   | 933   | 3917  | Friessenhahn cave                | Bezar        | Pleistocene   | Present study   | LM1    | length of first lower molar                             | R | 0.93  | 0.31  | 1.8   |  | $\text{Log}(\text{Body mass, g}) = 3.4287^* \text{Log}(\text{LM1, mm}) - 0.5316$   | 0.81 |      | all carnivores, Present Study                     |
| Carnivora | Mephitidae | <i>Mephitis</i>   | <i>mephitis</i>   | 908   | 3254  | Kincaid Shelter                  | Uvalde       | Holocene      | Present study   | HueB   | distal end, breadth of epicondyles of humerus           | R | 1.72  | 0.74  | 1.8   |  | $\text{Log}(\text{Body mass, g}) = 2.5160^* \text{Log}(\text{HueB, mm}) + 0.15426$ | 0.98 | na   | all carnivores, Present Study                     |
| Carnivora | Mephitidae | <i>Mephitis</i>   | <i>mephitis</i>   | M     | 1891  | Unknown                          | Modern       | Present study |                 | LM1    | length of first lower molar                             | L | 0.95  |       | 1.9   |  | $\text{Log}(\text{Body mass, g}) = 3.4287^* \text{Log}(\text{LM1, mm}) - 0.5316$   | 0.81 |      | all carnivores, Present Study                     |
| Carnivora | Mephitidae | <i>Mephitis</i>   | <i>mephitis</i>   | M     | 6297  | Unknown                          | Modern       | Present study |                 | LM1    | length of first lower molar                             | L | 0.95  |       | 1.9   |  | $\text{Log}(\text{Body mass, g}) = 3.4287^* \text{Log}(\text{LM1, mm}) - 0.5316$   | 0.81 |      | all carnivores, Present Study                     |
| Carnivora | Mephitidae | <i>Mephitis</i>   | <i>mephitis</i>   | M     | 493   | Pease Park                       | Modern       | Present study |                 | LM1    | length of first lower molar                             | L | 0.95  |       | 1.9   |  | $\text{Log}(\text{Body mass, g}) = 3.4287^* \text{Log}(\text{LM1, mm}) - 0.5316$   | 0.81 |      | all carnivores, Present Study                     |
| Carnivora | Mephitidae | <i>Mephitis</i>   | <i>mephitis</i>   | M     | 7440  | Pease Park                       | Modern       | Present study |                 | LM1    | length of first lower molar                             | L | 0.97  |       | 2.1   |  | $\text{Log}(\text{Body mass, g}) = 3.4287^* \text{Log}(\text{LM1, mm}) - 0.5316$   | 0.81 |      | all carnivores, Present Study                     |
| Carnivora | Mephitidae | <i>Mephitis</i>   | <i>mephitis</i>   | M     | 41172 | Pratt Cave                       | Calhoun      | Holocene      | Present study   | LM1    | length of first lower molar                             | L | 0.97  | 0.48  | 2.1   |  | $\text{Log}(\text{Body mass, g}) = 3.4287^* \text{Log}(\text{LM1, mm}) - 0.5316$   | 0.81 |      | all carnivores, Present Study                     |
| Carnivora | Mephitidae | <i>Mephitis</i>   | <i>mephitis</i>   | 40540 | 69    | Miller's Cave                    | Llano        | Pleistocene   | Present study   | UM1    | length of first upper molar                             | R | 0.98  | 0.74  | 2.2   |  | $\text{Log}(\text{Body mass, g}) = 3.4287^* \text{Log}(\text{LM1, mm}) - 0.5316$   | 0.81 |      | all carnivores, Present Study                     |
| Carnivora | Mephitidae | <i>Mephitis</i>   | <i>mephitis</i>   | 933   | 611   | Friessenhahn cave                | Bezar        | Pleistocene   | Present study   | LM2    | length of second lower molar                            | R | 1.00  | 0.50  | 2.4   |  | $\text{Log}(\text{Body mass, g}) = 3.4287^* \text{Log}(\text{LM1, mm}) - 0.5316$   | 0.81 |      | all carnivores, Present Study                     |
| Carnivora | Mephitidae | <i>Mephitis</i>   | <i>mephitis</i>   | 933   | 452   | Friessenhahn cave                | Bezar        | Pleistocene   | Present study   | LM2    | length of second lower molar                            | L | 1.01  | 0.46  | 2.5   |  | $\text{Log}(\text{Body mass, g}) = 3.4287^* \text{Log}(\text{LM1, mm}) - 0.5316$   | 0.81 |      | all carnivores, Present Study                     |
| Carnivora | Mephitidae | <i>Mephitis</i>   | <i>mephitis</i>   | 933   | 766   | Friessenhahn cave                | Bezar        | Pleistocene   | Present study   | LM2    | length of second lower molar                            | R | 1.01  | 0.47  | 2.5   |  | $\text{Log}(\text{Body mass, g}) = 3.4287^* \text{Log}(\text{LM1, mm}) - 0.5316$   | 0.   |      |                                                   |

|           |                   |                      |                        |       |      |                       |              |             |                 |         |                                               |   |       |      |       |  |                                                                                                                                                                               |      |       |                                                   |
|-----------|-------------------|----------------------|------------------------|-------|------|-----------------------|--------------|-------------|-----------------|---------|-----------------------------------------------|---|-------|------|-------|--|-------------------------------------------------------------------------------------------------------------------------------------------------------------------------------|------|-------|---------------------------------------------------|
| Carnivora | Procyonidae       | <i>Procyon</i>       | <i>Jotor</i>           | 43133 | 247  | Bering Sinkhole       | Kerr         | Holocene    | Present study   | LM1     | length of first lower molar                   | R | 1.15  | 0.66 | 2.7   |  | $\text{Log}(\text{Body mass}, g) = 5.738^* \text{Log}(\text{LM1}, \text{mm}) + 0.534$                                                                                         | 0.96 |       | Present study                                     |
| Carnivora | Procyonidae       | <i>Procyon</i>       | <i>Jotor</i>           | 43133 | 258  | Bering Sinkhole       | Kerr         | Holocene    | Present study   | LM1     | length of first lower molar                   | L | 1.18  | 0.63 | 3.0   |  | $\text{Log}(\text{Body mass}, g) = 5.738^* \text{Log}(\text{LM1}, \text{mm}) + 0.534$                                                                                         | 0.96 |       | Present study                                     |
| Carnivora | Procyonidae       | <i>Procyon</i>       | <i>Jotor</i>           | 40279 | 135  | Longhorn Cave         | Burnet       | Pleistocene | Present study   | HuEB    | distal end; breadth of epicondyles of humerus | R | 2.01  | 1.15 | 3.4   |  | $\text{Log}(\text{Body mass}, g) = 2.68359^* \text{Log}(\text{HuEB}, \text{mm}) + 0.40405$                                                                                    | 0.97 | na    | Present Study                                     |
| Carnivora | Procyonidae       | <i>Procyon</i>       | <i>Jotor</i>           | 43133 | 264  | Bering Sinkhole       | Kerr         | Holocene    | Present study   | UM1     | length of first upper molar                   | R | 0.91  | 0.93 | 4.5   |  | $\text{Log}(\text{Body mass}, g) = 2.02747^* (\text{Log}(\text{UM1}, \text{mm}) + 1.70866)$                                                                                   | 0.83 | na    | All carnivora, Present study                      |
| Carnivora | Procyonidae       | <i>Procyon</i>       | <i>Jotor</i>           | 43133 | 265  | Bering Sinkhole       | Kerr         | Holocene    | Present study   | UM1     | length of first upper molar                   | L | 0.93  | 0.91 | 4.7   |  | $\text{Log}(\text{Body mass}, g) = 2.02747^* (\text{Log}(\text{UM1}, \text{mm}) + 1.70866)$                                                                                   | 0.83 | na    | All carnivora, Present study                      |
| Carnivora | Procyonidae       | <i>Procyon</i>       | <i>Jotor</i>           | 43133 | 254  | Bering Sinkhole       | Kerr         | Holocene    | Present study   | UM1     | length of first upper molar                   | R | 0.97  | 0.89 | 5.1   |  | $\text{Log}(\text{Body mass}, g) = 2.02747^* (\text{Log}(\text{UM1}, \text{mm}) + 1.70866)$                                                                                   | 0.83 | na    | All carnivora, Present study                      |
| Carnivora | Procyonidae       | <i>Procyon</i>       | <i>Jotor</i>           | 43133 | 266  | Bering Sinkhole       | Kerr         | Holocene    | Present study   | LP4     | length of fourth lower premolar               | R | 0.79  | 0.57 | 8.4   |  | $\text{Log}(\text{Body mass}, g) = 1.92282^* (\text{Log}(\text{LP4}, \text{mm}) + 2.19684)$                                                                                   | 0.83 | na    | All carnivora, Present study                      |
| Carnivora | Procyonidae       | <i>Procyon</i>       | <i>Jotor</i>           | 43133 | 255  | Bering Sinkhole       | Kerr         | Holocene    | Present study   | UM2     | length of second upper molar                  | L | 0.86  | 0.74 | 9.8   |  | $\text{Log}(\text{Body mass}, g) = 1.92282^* (\text{Log}(\text{UM2}, \text{mm}) + 2.19684)$                                                                                   | 0.83 | na    | All carnivora, Present Study                      |
| Carnivora | Procyonidae       | <i>Procyon</i>       | <i>Jotor</i>           | 43133 | 256  | Bering Sinkhole       | Kerr         | Holocene    | Present study   | LM2     | length of second lower molar                  | R | 0.97  | 0.57 | 12.5  |  | $\text{Log}(\text{Body mass}, g) = 1.92282^* (\text{Log}(\text{LM2}, \text{mm}) + 2.19684)$                                                                                   | 0.83 | na    | All carnivora, Present Study                      |
| Carnivora | Procyonidae       | <i>Procyon</i>       | <i>Jotor</i>           | 933   | 1873 | Friesenhahn cave      | Bezar        | Pleistocene | Present study   | LM3     | length of third lower molar                   | R | 0.99  | 0.45 | 12.8  |  | $\text{Log}(\text{Body mass}, g) = 1.92282^* (\text{Log}(\text{LM3}, \text{mm}) + 2.19684)$                                                                                   | 0.83 | na    | All carnivora, Present Study                      |
| Carnivora | Procyonidae       | <i>Procyon</i>       | <i>Jotor</i>           | 43133 | 259  | Bering Sinkhole       | Kerr         | Holocene    | Present study   | LM2     | length of second lower molar                  | R | 1.10  | 0.67 | 15.8  |  | $\text{Log}(\text{Body mass}, g) = 1.92282^* (\text{Log}(\text{LM2}, \text{mm}) + 2.19684)$                                                                                   | 0.83 | na    | All carnivora, Present Study                      |
| Carnivora | Procyonidae       | <i>Procyon</i>       | <i>Jotor</i>           | 43133 | 253  | Bering Sinkhole       | Kerr         | Holocene    | Present study   | LM2     | length of second lower molar                  | R | 1.23  | 0.64 | 19.6  |  | $\text{Log}(\text{Body mass}, g) = 1.92282^* (\text{Log}(\text{LM2}, \text{mm}) + 2.19684)$                                                                                   | 0.83 | na    | All carnivora, Present Study                      |
| Carnivora | Procyonidae       | <i>Procyon</i>       | <i>Jotor</i>           | 40449 | 40   | Levi Shelter          | Travis       | Pleistocene | Present study   | Mc      | metacarpal -1                                 | R | 0.47  | 0.44 |       |  |                                                                                                                                                                               |      |       |                                                   |
| Carnivora | Procyonidae       | <i>Procyon</i>       | <i>Jotor</i>           | 40449 | 203  | Levi Shelter          | Travis       | Pleistocene | Present study   | Mc      | metacarpal -3                                 | R | 0.44  | 0.40 |       |  |                                                                                                                                                                               |      |       |                                                   |
| Carnivora | Procyonidae       | <i>Procyon</i>       | <i>Jotor</i>           | 40449 | 507  | Levi Shelter          | Travis       | Pleistocene | Present study   | Mc      | metacarpal -2                                 | R | 0.51  | 0.45 |       |  |                                                                                                                                                                               |      |       |                                                   |
| Carnivora | Procyonidae       | <i>Procyon</i>       | <i>Jotor</i>           | 40449 | 508  | Levi Shelter          | Travis       | Pleistocene | Present study   | Mt      | metatarsal -2                                 | R | 0.56  | 0.49 |       |  |                                                                                                                                                                               |      |       |                                                   |
| Carnivora | Ursidae           | <i>Arctodus</i>      | <i>atnus</i>           | 43059 | 305  | Wight Materials North |              | Pleistocene | Present study   | HuEB    | distal end; breadth of epicondyles of humerus | L | 11.10 | 7.79 | 202.3 |  | $\text{Log}(\text{Body mass}, g) = 1.47^* \text{Log}(\text{HuEB}, \text{mm}) + 2.29$                                                                                          | 0.78 | na    | Present study                                     |
| Carnivora | Ursidae           | <i>Arctodus</i>      | <i>atnus</i>           | 933   | 2156 | Friesenhahn cave      | Bezar        | Pleistocene | Present study   | LM2     | length of second lower molar                  | L | 2.91  | 1.80 | 268.2 |  | $\text{Log}(\text{Body mass}, g) = 1.59^* \text{Log}(\text{LM2 length}, \text{mm}) + 3.10$                                                                                    | 0.33 | na    | Ursida, Present study                             |
| Carnivora | Ursidae           | <i>Arctodus</i>      | <i>atnus</i>           | 933   | 2305 | Friesenhahn cave      | Bezar        | Pleistocene | Present study   | LM2     | length of third lower molar                   | R | 2.03  | 1.40 | 293.4 |  | $\text{Log}(\text{Body mass}, g) = 2.20156^* \text{Log}(\text{LM2}, \text{mm}) + 2.58945$                                                                                     | 0.88 | na    | All carnivora, Present Study                      |
| Carnivora | Ursidae           | <i>Thomomys</i>      | <i>holistans</i>       | 30967 | 1031 | Ingledale             | San Patricio | Pleistocene | Present study   | LM3     | length of third lower molar                   | F | 1.63  | 1.18 | 127.0 |  | $\text{Log}(\text{Body mass}, g) = \text{average}(1.9336^* \text{Log}(\text{LM1}, \text{mm}) + 2.7, 1.5878^* \text{Log}(\text{LM2}) + 3.1043, 1.07^* \text{Log}(\text{LM3}))$ | 0.25 | na    | Present study                                     |
| Carnivora | Ursidae           | <i>Thomomys</i>      | <i>holistans</i>       | 30967 | 1880 | Ingledale             | San Patricio | Pleistocene | Present study   | LM3     | length of third lower molar                   | F | 2.16  | 1.26 | 356.4 |  | $\text{Log}(\text{Body mass}, g) = 2.20156^* \text{Log}(\text{LM3}, \text{mm}) + 2.58945$                                                                                     | 0.88 | na    | All carnivora, Present Study                      |
| Carnivora | Ursidae           | <i>Ursus</i>         | <i>americanus</i>      | 40685 | 106  | Zach Cove             | Mason        | Pleistocene | Present study   | FeB     | distal end; breadth of epicondyles of femur   | R | 6.30  | 5.32 | 120.4 |  | $\text{Log}(\text{Body mass}, g) = 1.61^* \text{Log}(\text{FeB}, \text{mm}) + 2.19$                                                                                           | 0.60 | na    | Present study                                     |
| Carnivora | Ursidae           | <i>Ursus</i>         | <i>americanus</i>      | 40685 | 107  | Zach Cove             | Mason        | Pleistocene | Present study   | FeB     | distal end; breadth of epicondyles of femur   | R | 6.32  | 5.43 | 120.9 |  | $\text{Log}(\text{Body mass}, g) = 1.61^* \text{Log}(\text{FeB}, \text{mm}) + 2.19$                                                                                           | 0.60 | na    | Present study                                     |
| Carnivora | Ursidae           | <i>Ursus</i>         | <i>americanus</i>      | 43565 | 1    | Sanders Ranch Cave    | Williamson   | Holocene    | Present study   | UM1     | length of first upper molar                   | R | 1.65  | 1.16 | 125.9 |  | $\text{Log}(\text{Body mass}, g) = 1.66^* \text{Log}(\text{UM1 length}, \text{mm}) + 3.08$                                                                                    | 0.40 | na    | Ursida, Present study                             |
| Carnivora | Ursidae           | <i>Ursus</i>         | <i>americanus</i>      | 40685 | 7308 | Scholin Cave          | Edwards      | Holocene    | Present study   | FeB     | distal end; breadth of epicondyles of femur   | L | 6.71  | 6.23 | 133.3 |  | $\text{Log}(\text{Body mass}, g) = 1.61^* \text{Log}(\text{FeB}, \text{mm}) + 2.19$                                                                                           | 0.60 | na    | Present study                                     |
| Carnivora | Ursidae           | <i>Ursus</i>         | <i>americanus</i>      | 40685 | 94   | Zach Cove             | Mason        | Pleistocene | Present study   | TiB     | distal end; breadth of tibia                  | L | 5.96  | 5.02 | 133.4 |  | $\text{Log}(\text{Body mass}, g) = 1.62^* \text{Log}(\text{TiB}, \text{mm}) + 2.19$                                                                                           | 0.60 | 100.0 | Figuetido et al. 2010 (Telemi. canids and ursids) |
| Carnivora | Ursidae           | <i>Ursus</i>         | <i>americanus</i>      | 933   | 3543 | Friesenhahn cave      | Bezar        | Pleistocene | Present study   | UM2     | length of second upper molar                  | R | 1.80  | 1.39 | 146.7 |  | $\text{Log}(\text{Body mass}, g) = 1.66^* \text{Log}(\text{UM2}, \text{mm}) + 3.08$                                                                                           | 0.40 | na    | Present study                                     |
| Carnivora | Ursidae           | <i>Ursus</i>         | <i>americanus</i>      | 40685 | 1    | Zach Cove             | Mason        | Pleistocene | Present study   | LM2     | length of second lower molar                  | R | 2.00  | 1.05 | 147.5 |  | $\text{Log}(\text{Body mass}, g) = 1.59^* \text{Log}(\text{LM2 length}, \text{mm}) + 1.61$                                                                                    | 0.33 | na    | Ursida, Present study                             |
| Carnivora | Ursidae           | <i>Ursus</i>         | <i>americanus</i>      | 43133 | 1130 | Bering Sinkhole       | Kerr         | Holocene    | Present study   | LM1     | length of first lower molar                   | R | 1.57  | 1.24 | 148.7 |  | $\text{Log}(\text{Body mass}, g) = 1.93^* \text{Log}(\text{LM1}, \text{mm}) + 2.67$                                                                                           | 0.58 | na    | Present study                                     |
| Carnivora | Ursidae           | <i>Ursus</i>         | <i>americanus</i>      | 43133 | 1130 | Bering Sinkhole       | Kerr         | Holocene    | Present study   | LM1     | length of first lower molar                   | R | 1.57  | 1.24 | 148.7 |  | $\text{Log}(\text{Body mass}, g) = 1.93^* \text{Log}(\text{LM1}, \text{mm}) + 2.67$                                                                                           | 0.58 | na    | Present study                                     |
| Carnivora | Ursidae           | <i>Ursus</i>         | <i>americanus</i>      | 43559 | 1    | Claudian Cave Loc. 1  |              | Holocene    | Present study   | LM1     | length of first lower molar                   | R | 2.00  | 1.21 | 152.6 |  | $\text{Log}(\text{Body mass}, g) = 1.93^* \text{Log}(\text{LM1}, \text{mm}) + 2.67$                                                                                           | 0.58 | na    | Present study                                     |
| Carnivora | Ursidae           | <i>Ursus</i>         | <i>americanus</i>      | 40685 | 104  | Zach Cove             | Mason        | Pleistocene | Present study   | FeB     | distal end; breadth of epicondyles of femur   | R | 7.50  | 6.60 | 159.3 |  | $\text{Log}(\text{Body mass}, g) = 1.61^* \text{Log}(\text{FeB}, \text{mm}) + 2.19$                                                                                           | 0.60 | na    | Present study                                     |
| Carnivora | Ursidae           | <i>Ursus</i>         | <i>americanus</i>      | 40685 | 102  | Zach Cove             | Mason        | Pleistocene | Present study   | FeB     | distal end; breadth of epicondyles of femur   | R | 7.54  | 6.99 | 160.6 |  | $\text{Log}(\text{Body mass}, g) = 1.61^* \text{Log}(\text{FeB}, \text{mm}) + 2.19$                                                                                           | 0.60 | na    | Present study                                     |
| Carnivora | Ursidae           | <i>Ursus</i>         | <i>americanus</i>      | 40685 | 99   | Zach Cove             | Mason        | Pleistocene | Present study   | LM2     | length of second lower molar                  | R | 2.11  | 1.05 | 160.8 |  | $\text{Log}(\text{Body mass}, g) = 1.59^* \text{Log}(\text{LM2 length}, \text{mm}) + 3.10$                                                                                    | 0.33 | na    | Ursida, Present study                             |
| Carnivora | Ursidae           | <i>Ursus</i>         | <i>americanus</i>      | 40685 | 105  | Zach Cove             | Mason        | Pleistocene | Present study   | FeB     | distal end; breadth of epicondyles of femur   | L | 7.56  | 6.73 | 161.3 |  | $\text{Log}(\text{Body mass}, g) = 1.61^* \text{Log}(\text{FeB}, \text{mm}) + 2.19$                                                                                           | 0.60 | na    | Present study                                     |
| Carnivora | Ursidae           | <i>Ursus</i>         | <i>americanus</i>      | 40685 | 103  | Zach Cove             | Mason        | Pleistocene | Present study   | FeB     | distal end; breadth of epicondyles of femur   | L | 7.61  | 6.97 | 163.0 |  | $\text{Log}(\text{Body mass}, g) = 1.61^* \text{Log}(\text{FeB}, \text{mm}) + 2.19$                                                                                           | 0.60 | na    | Present study                                     |
| Carnivora | Ursidae           | <i>Ursus</i>         | <i>americanus</i>      | 40685 | 2    | Zach Cove             | Mason        | Pleistocene | Present study   | LM2     | length of second lower molar                  | L | 2.15  | 1.45 | 163.7 |  | $\text{Log}(\text{Body mass}, g) = 1.59^* \text{Log}(\text{LM2 length}, \text{mm}) + 3.10$                                                                                    | 0.33 | na    | Ursida, Present study                             |
| Carnivora | Ursidae           | <i>Ursus</i>         | <i>americanus</i>      | 40540 | 60   | Miller's Cave         | Llano        | Pleistocene | Present study   | LM1     | length of first lower molar                   | R | 2.34  | 1.40 | 191.0 |  | $\text{Log}(\text{Body mass}, g) = 1.93^* \text{Log}(\text{LM1}, \text{mm}) + 2.67$                                                                                           | 0.58 | na    | Present study                                     |
| Carnivora | Ursidae           | <i>Ursus</i>         | <i>americanus</i>      | 40685 | 142  | Zach Cove             | Mason        | Pleistocene | Present study   | TiEB    | distal end; breadth of tibia                  | R | 8.09  | 7.30 | 247.4 |  | $\text{Log}(\text{Body mass}, g) = 2.02^* \text{Log}(\text{TiEB}, \text{mm}) + 1.461$                                                                                         | 0.90 | 100.0 | Figuetido et al. 2010 (Telemi. canids and ursids) |
| Carnivora | Ursidae           | <i>Ursus</i>         | <i>americanus</i>      | 40685 | 140  | Zach Cove             | Mason        | Pleistocene | Present study   | TiEB    | distal end; breadth of tibia                  | L | 8.13  | 6.71 | 249.4 |  | $\text{Log}(\text{Body mass}, g) = 2.02^* \text{Log}(\text{TiEB}, \text{mm}) + 1.461$                                                                                         | 0.90 | 100.0 | Figuetido et al. 2010 (Telemi. canids and ursids) |
| Carnivora | Ursidae           | <i>Ursus</i>         | <i>americanus</i>      | 41284 | 215  | Don Williams Cave     | Hays         | Holocene    | Present study   | UM1     | length of first upper molar                   | R | 3.00  | 1.76 | 340.3 |  | $\text{Log}(\text{Body mass}, g) = 1.66^* \text{Log}(\text{UM1 length}, \text{mm}) + 3.08$                                                                                    | 0.40 | na    | Ursida, Present study                             |
| Carnivora | Ursidae           | <i>Ursus</i>         | <i>americanus</i>      | 40279 | 138  | Longhorn Cave         | Burnet       | Pleistocene | Present study   | UM1     | length of first upper molar                   | L | 3.05  | 1.68 | 350.3 |  | $\text{Log}(\text{Body mass}, g) = 1.66^* \text{Log}(\text{UM1 length}, \text{mm}) + 3.08$                                                                                    | 0.40 | na    | Ursida, Present study                             |
| Carnivora | Ursidae           | <i>Ursus</i>         | <i>americanus</i>      | 933   | 2634 | Friesenhahn cave      | Bezar        | Pleistocene | Present study   | Mt      | metatarsal                                    | L | 1.49  | 2.20 |       |  |                                                                                                                                                                               |      |       |                                                   |
| Carnivora | Ursidae           | <i>Ursus</i>         | <i>americanus</i>      | 40540 | 61a  | Miller's Cave         | Llano        | Pleistocene | Present study   | Phalanx | phalanx                                       | L | 1.32  | 0.88 |       |  |                                                                                                                                                                               |      |       |                                                   |
| Carnivora | Ursidae           | <i>Ursus</i>         | <i>americanus</i>      | 40540 | 61b  | Miller's Cave         | Llano        | Pleistocene | Present study   | Phalanx | phalanx                                       | L | 1.14  | 0.92 |       |  |                                                                                                                                                                               |      |       |                                                   |
| Carnivora | Ursidae           | <i>Ursus</i>         | <i>americanus</i>      | 41284 | 16   | Don Williams Cave     | Hays         | Holocene    | Present study   | LM1     | length of first lower molar                   | L | 2.07  | 1.32 | 164.3 |  | $\text{Log}(\text{Body mass}, g) = 1.93^* \text{Log}(\text{LM1}, \text{mm}) + 2.67$                                                                                           | 0.58 | na    | Present study                                     |
| Cingulata | Chlamyphoridae    | <i>Glyptotherium</i> | <i>floridanum</i>      | 30967 | 1814 | Ingledale             | San Patricio | Pleistocene | Lundelius 1922b | LM      | length of lower 3 or 4th molar                | L | 2.20  | 1.10 |       |  |                                                                                                                                                                               |      |       |                                                   |
| Cingulata | Chlamyphoridae    | <i>Glyptotherium</i> | <i>floridanum</i>      | 31034 | 31   | O'Brian Ranch         | Bee          | Pleistocene | Present study   | LM1     | length of first lower molar                   | R | 2.00  | 1.25 |       |  |                                                                                                                                                                               |      |       |                                                   |
| Cingulata | Chlamyphoridae    | <i>Glyptotherium</i> | <i>floridanum</i>      | 31034 | 30   | O'Brian Ranch         | Bee          | Pleistocene | Present study   | LM8     | eighth lower molar                            | L | 1.86  | 1.23 |       |  |                                                                                                                                                                               |      |       |                                                   |
| Cingulata | Chlamyphoridae    | <i>Glyptotherium</i> | <i>floridanum</i>      | 31034 | 125  | O'Brian Ranch         | Bee          | Pleistocene | Present study   | LM8     | ninth lower molar                             | L | 2.18  | 1.10 |       |  |                                                                                                                                                                               |      |       |                                                   |
| Cingulata | Psephenotheriidae | <i>Holmatina</i>     | <i>septentrionalis</i> | 43059 | 316  | Wight Materials North |              | Pleistocene | Present study   | HuMAPD  | midshaft anteroposterior diameter of humerus  | R | 3.22  |      | 61.2  |  | $\text{Log}(\text{Body mass}, g) = 2.66975^* \text{Log}(\text{HuMAPD}), g - 0.13193$                                                                                          | 0.98 |       | All mammals, Present Study                        |
| Cingulata | Psephenotheriidae | <i>Holmatina</i>     | <i>septentrionalis</i> | 51041 | 129  | Ingledale             | San Patricio | Pleistocene | Lundelius       | Mt      | second metatarsal                             | R | 4.61  | 2.00 |       |  |                                                                                                                                                                               |      |       |                                                   |
| Cingulata | Psephenotheriidae | <i>Holmatina</i>     | <i>septentrionalis</i> | 30967 | 870  | Ingledale             | San Patricio | Pleistocene | Present study   | HuL     | length of humerus                             | R | 28.60 |      | 139.9 |  | $\text{Log}(\text{Body mass}, g) = 2.79712^* \text{Log}(\text{HuL}), g - 1.72502$                                                                                             | 0.96 |       |                                                   |







|                |         |              |     |       |                            |                                |              |               |                 |                 |                                       |      |       |                                                                                                         |                                                                                                         |      |                                       |                                                       |
|----------------|---------|--------------|-----|-------|----------------------------|--------------------------------|--------------|---------------|-----------------|-----------------|---------------------------------------|------|-------|---------------------------------------------------------------------------------------------------------|---------------------------------------------------------------------------------------------------------|------|---------------------------------------|-------------------------------------------------------|
| Perissodactyla | Equidae | <i>Equus</i> | sp. | 30967 | 947                        | Ingleside                      | San Patricio | Pleistocene   | Lundelius 1972b | UM3             | length of third upper molar           | 2.53 | 2.08  | 238.8                                                                                                   | Log(Body mass, kg) = 2.9*Log(UM2, cm) + 1.209                                                           | 0.96 | 30.5                                  | Table 16.8, Damuth and MacFadden 1990                 |
| Perissodactyla | Equidae | <i>Equus</i> | sp. | 3     | 2187                       | Pittsbridge                    | Brazos       | Pleistocene   | Present study   | M2              | length of third molar                 | 2.55 | 1.15  | 239.7                                                                                                   | Log(Body mass, kg) = 2.999*Log(LM3, cm) + 1.162                                                         | 0.99 | 18.0                                  | Perissodactyla, Table 16.8, Damuth and MacFadden 1990 |
| Perissodactyla | Equidae | <i>Equus</i> | sp. | -999  | -                          | Brazos river                   | Brazos       | Pleistocene   | Present study   | M3              | length of second molar                | 2.49 | 2.49  | 241.5                                                                                                   | Log(Body mass, kg) = Average[3.01*Log(LM2, cm) + 1.216, 2.9*LOG(UM2, cm) + 1.209]                       | 0.99 | 16.9                                  | Table 16.8, Damuth and MacFadden 1990                 |
| Perissodactyla | Equidae | <i>Equus</i> | sp. | -     | Lot 3                      | Sealy                          | Austin       | Pleistocene   | Present study   | M1              | length of molar                       | 2.42 | 2.49  | 249.9                                                                                                   | y mass, kg) = average[3.187*Log(LM1, cm) + 1.264, 3.01*Log(LM2, cm) + 1.216, 2.99*Log(LM3, cm) + 1.209] | 0.99 | 16.5                                  | Table 16.8, Damuth and MacFadden 1990                 |
| Perissodactyla | Equidae | <i>Equus</i> | sp. | 31058 | 2                          | Blanco creek                   | Goliad       | Pleistocene   | Present study   | UM1             | length of first upper molar           | 2.46 | 2.78  | 257.3                                                                                                   | Log(Body mass, kg) = 2.9*Log(UM2, cm) + 1.209                                                           | 0.96 | 30.5                                  | Table 16.8, Damuth and MacFadden 1990                 |
| Perissodactyla | Equidae | <i>Equus</i> | sp. | 2351  | 42                         | Cameron (Curry Gravel Pit)     | Milam        | Pleistocene   | Present study   | M1              | length of molar                       | 2.45 | 1.41  | 259.2                                                                                                   | y mass, kg) = average[3.187*Log(LM1, cm) + 1.264, 3.01*Log(LM2, cm) + 1.216, 2.99*Log(LM3, cm) + 1.209] | 0.99 | 16.5                                  | Table 16.8, Damuth and MacFadden 1990                 |
| Perissodactyla | Equidae | <i>Equus</i> | sp. | 908   | 2436                       | Kincaid Shelter                | Uvalde       | Pleistocene   | Present study   | UM3             | length of third upper molar           | 2.61 | 2.13  | 262.0                                                                                                   | Log(Body mass, kg) = 2.9*Log(UM2, cm) + 1.209                                                           | 0.96 | 30.5                                  | Table 16.8, Damuth and MacFadden 1990                 |
| Perissodactyla | Equidae | <i>Equus</i> | sp. | 3     | 2187                       | Pittsbridge                    | Brazos       | Pleistocene   | Present study   | M2              | length of second molar                | 2.56 | 1.36  | 263.7                                                                                                   | Log(Body mass, kg) = Average[3.01*Log(LM2, cm) + 1.216, 2.9*LOG(UM2, cm) + 1.209]                       | 0.99 | 16.9                                  | Table 16.8, Damuth and MacFadden 1990                 |
| Perissodactyla | Equidae | <i>Equus</i> | sp. | 31041 | 33                         | Salt Fork Brazos River         | Stonewall    | Pleistocene   | Present study   | LM1             | length of first lower molar           | 2.31 | 1.75  | 264.4                                                                                                   | Log(Body mass, kg) = 3.187*Log(LM1, cm) + 1.264                                                         | 0.99 | 16.5                                  | Table 16.8, Damuth and MacFadden 1990                 |
| Perissodactyla | Equidae | <i>Equus</i> | sp. | 2351  | 4                          | Cameron (Curry Gravel Pit)     | Milam        | Pleistocene   | Present study   | M1              | length of molar                       | 2.48 | 2.71  | 267.1                                                                                                   | y mass, kg) = average[3.187*Log(LM1, cm) + 1.264, 3.01*Log(LM2, cm) + 1.216, 2.99*Log(LM3, cm) + 1.209] | 0.99 | 16.5                                  | Table 16.8, Damuth and MacFadden 1990                 |
| Perissodactyla | Equidae | <i>Equus</i> | sp. | 30967 | 36A                        | Ingleside                      | San Patricio | Pleistocene   | Lundelius 1972b | UM              | length of upper molar                 | 2.63 | 2.62  | 267.2                                                                                                   | Log(Body mass, kg) = 2.9*Log(UM2, cm) + 1.209                                                           | 0.96 | 30.5                                  | Perissodactyla, Table 16.8, Damuth and MacFadden 1990 |
| Perissodactyla | Equidae | <i>Equus</i> | sp. | 2351  | 25                         | Cameron (Curry Gravel Pit)     | Milam        | Pleistocene   | Present study   | M               | length of molar                       | 2.54 | 1.87  | 288.3                                                                                                   | y mass, kg) = average[3.187*Log(LM1, cm) + 1.264, 3.01*Log(LM2, cm) + 1.216, 2.99*Log(LM3, cm) + 1.209] | 0.99 | 16.5                                  | Table 16.8, Damuth and MacFadden 1990                 |
| Perissodactyla | Equidae | <i>Equus</i> | sp. | 908   | 2319                       | Kincaid Shelter                | Uvalde       | Pleistocene   | Present study   | UM or UP        | upper cheek tooth                     | 2.70 | 2.42  | 288.4                                                                                                   | Log(Body mass, kg) = 2.9*Log(UM2, cm) + 1.209                                                           | 0.96 | 30.5                                  | Perissodactyla, Table 16.8, Damuth and MacFadden 1990 |
| Perissodactyla | Equidae | <i>Equus</i> | sp. | -     | W123                       | Cameron (SUSTR P14, 2.5 mi. E) | Milam        | Pleistocene   | Present study   | M3              | length of third molar                 | 2.72 | 2.59  | 292.6                                                                                                   | Log(Body mass, kg) = 2.999*Log(LM3, cm) + 1.162                                                         | 0.99 | 18.0                                  | Perissodactyla, Table 16.8, Damuth and MacFadden 1990 |
| Perissodactyla | Equidae | <i>Equus</i> | sp. | -999  | -                          | Hearne gravel pits             | Robertson    | Pleistocene   | Present study   | M1              | length of molar                       | 2.56 | 2.53  | 296.4                                                                                                   | y mass, kg) = average[3.187*Log(LM1, cm) + 1.264, 3.01*Log(LM2, cm) + 1.216, 2.99*Log(LM3, cm) + 1.209] | 0.99 | 16.5                                  | Table 16.8, Damuth and MacFadden 1990                 |
| Perissodactyla | Equidae | <i>Equus</i> | sp. | 3     | 2556                       | Pittsbridge                    | Brazos       | Pleistocene   | Present study   | M2              | length of second molar                | 2.68 | 1.95  | 301.9                                                                                                   | Log(Body mass, kg) = Average[3.01*Log(LM2, cm) + 1.216, 2.9*LOG(UM2, cm) + 1.209]                       | 0.99 | 16.9                                  | Table 16.8, Damuth and MacFadden 1990                 |
| Perissodactyla | Equidae | <i>Equus</i> | sp. | 2384  | unknown                    | Cameron (Curry Gravel Pit)     | Milam        | Pleistocene   | Present study   | UM1             | length of first upper molar           | 2.74 | 2.98  | 302.2                                                                                                   | Log(Body mass, kg) = 2.9*Log(UM2, cm) + 1.209                                                           | 0.96 | 30.5                                  | Table 16.8, Damuth and MacFadden 1990                 |
| Perissodactyla | Equidae | <i>Equus</i> | sp. | -     | B                          | Cameron (SUSTR P14, 2.5 mi. E) | Milam        | Pleistocene   | Present study   | M               | length of molar                       | 2.58 | 2.29  | 303.6                                                                                                   | y mass, kg) = average[3.187*Log(LM1, cm) + 1.264, 3.01*Log(LM2, cm) + 1.216, 2.99*Log(LM3, cm) + 1.209] | 0.99 | 16.5                                  | Table 16.8, Damuth and MacFadden 1990                 |
| Perissodactyla | Equidae | <i>Equus</i> | sp. | -999  | -                          | Hearne gravel pits             | Robertson    | Pleistocene   | Present study   | M               | length of molar                       | 2.59 | 2.49  | 307.2                                                                                                   | y mass, kg) = average[3.187*Log(LM1, cm) + 1.264, 3.01*Log(LM2, cm) + 1.216, 2.99*Log(LM3, cm) + 1.209] | 0.99 | 16.5                                  | Table 16.8, Damuth and MacFadden 1990                 |
| Perissodactyla | Equidae | <i>Equus</i> | sp. | 3     | 2352                       | Pittsbridge                    | Brazos       | Pleistocene   | Present study   | M               | length of molar                       | 2.62 | 3.16  | 317.6                                                                                                   | y mass, kg) = average[3.187*Log(LM1, cm) + 1.264, 3.01*Log(LM2, cm) + 1.216, 2.99*Log(LM3, cm) + 1.209] | 0.99 | 16.5                                  | Table 16.8, Damuth and MacFadden 1990                 |
| Perissodactyla | Equidae | <i>Equus</i> | sp. | 117 A | Lot 4                      | Sealy                          | Austin       | Pleistocene   | Present study   | M3?             | length of third molar                 | 2.81 | 2.49  | 320.5                                                                                                   | Log(Body mass, kg) = 2.999*Log(LM3, cm) + 1.162                                                         | 0.99 | 18.0                                  | Perissodactyla, Table 16.8, Damuth and MacFadden 1990 |
| Perissodactyla | Equidae | <i>Equus</i> | sp. | 31107 | 26                         | Old Glory                      | Stonewall    | Pleistocene   | Present study   | LM1             | length of first lower molar           | 2.46 | 1.62  | 323.5                                                                                                   | Log(Body mass, kg) = 3.187*Log(LM1, cm) + 1.264                                                         | 0.99 | 16.5                                  | Table 16.8, Damuth and MacFadden 1990                 |
| Perissodactyla | Equidae | <i>Equus</i> | sp. | -999  | -                          | Hearne gravel pits             | Robertson    | Pleistocene   | Present study   | M               | length of molar                       | 2.64 | 2.82  | 325.9                                                                                                   | y mass, kg) = average[3.187*Log(LM1, cm) + 1.264, 3.01*Log(LM2, cm) + 1.216, 2.99*Log(LM3, cm) + 1.209] | 0.99 | 16.5                                  | Table 16.8, Damuth and MacFadden 1990                 |
| Perissodactyla | Equidae | <i>Equus</i> | sp. | 2351  | 15                         | Cameron (Curry Gravel Pit)     | Milam        | Pleistocene   | Present study   | M               | length of molar                       | 2.64 | 1.88  | 326.3                                                                                                   | y mass, kg) = average[3.187*Log(LM1, cm) + 1.264, 3.01*Log(LM2, cm) + 1.216, 2.99*Log(LM3, cm) + 1.209] | 0.99 | 16.5                                  | Table 16.8, Damuth and MacFadden 1990                 |
| Perissodactyla | Equidae | <i>Equus</i> | sp. | 101   | 3047                       | Cameron (SUSTR P14, 2.5 mi. E) | n/a          | Pleistocene   | Present study   | LM2             | length of second lower molar          | 2.70 | 1.74  | 326.9                                                                                                   | Log(Body mass, kg) = 3.01*Log(LM2, cm) + 1.216                                                          | 0.99 | 16.9                                  | Perissodactyla, Table 16.8, Damuth and MacFadden 1990 |
| Perissodactyla | Equidae | <i>Equus</i> | sp. | -     | W123                       | Joe Rancho                     | Austin       | Pleistocene   | Present study   | M2              | length of second molar                | 2.77 | 1.72  | 331.5                                                                                                   | Log(Body mass, kg) = Average[3.01*Log(LM2, cm) + 1.216, 2.9*LOG(UM2, cm) + 1.209]                       | 0.99 | 16.9                                  | Table 16.8, Damuth and MacFadden 1990                 |
| Perissodactyla | Equidae | <i>Equus</i> | sp. | -999  | -                          | Hearne gravel pits             | Robertson    | Pleistocene   | Present study   | M2              | length of second molar                | 2.79 | 1.89  | 339.3                                                                                                   | Log(Body mass, kg) = Average[3.01*Log(LM2, cm) + 1.216, 2.9*LOG(UM2, cm) + 1.209]                       | 0.99 | 16.9                                  | Table 16.8, Damuth and MacFadden 1990                 |
| Perissodactyla | Equidae | <i>Equus</i> | sp. | -999  | -                          | Hearne gravel pits             | Robertson    | Pleistocene   | Present study   | M               | length of molar                       | 2.68 | 1.74  | 339.4                                                                                                   | y mass, kg) = average[3.187*Log(LM1, cm) + 1.264, 3.01*Log(LM2, cm) + 1.216, 2.99*Log(LM3, cm) + 1.209] | 0.99 | 16.5                                  | Table 16.8, Damuth and MacFadden 1990                 |
| Perissodactyla | Equidae | <i>Equus</i> | sp. | -     | 2819                       | Quince Creek                   | Madley       | Pleistocene   | Present study   | LM1             | length of first lower molar           | 2.50 | 1.65  | 340.2                                                                                                   | Log(Body mass, kg) = 3.187*Log(LM1, cm) + 1.264                                                         | 0.99 | 16.5                                  | Table 16.8, Damuth and MacFadden 1990                 |
| Perissodactyla | Equidae | <i>Equus</i> | sp. | -999  | -                          | Hearne gravel pits             | Robertson    | Pleistocene   | Present study   | M               | length of molar                       | 2.68 | 1.70  | 343.3                                                                                                   | y mass, kg) = average[3.187*Log(LM1, cm) + 1.264, 3.01*Log(LM2, cm) + 1.216, 2.99*Log(LM3, cm) + 1.209] | 0.99 | 16.5                                  | Table 16.8, Damuth and MacFadden 1990                 |
| Perissodactyla | Equidae | <i>Equus</i> | sp. | -999  | -                          | Hearne gravel pits             | Robertson    | Pleistocene   | Present study   | M               | length of molar                       | 2.68 | 1.88  | 347.3                                                                                                   | y mass, kg) = average[3.187*Log(LM1, cm) + 1.264, 3.01*Log(LM2, cm) + 1.216, 2.99*Log(LM3, cm) + 1.209] | 0.99 | 16.5                                  | Table 16.8, Damuth and MacFadden 1990                 |
| Perissodactyla | Equidae | <i>Equus</i> | sp. | 20839 | 35                         | Moshin Mound                   | Victoria     | Pleistocene   | Present study   | LM1 or LM2      | length of first or second lower molar | 2.61 | 1.49  | 342.1                                                                                                   | Log(Body mass, kg) = average[3.187*Log(LM1, cm) + 1.264, 3.01*Log(LM2, cm) + 1.216]                     | 0.99 | 16.5                                  | Perissodactyla, Table 16.8, Damuth and MacFadden 1990 |
| Perissodactyla | Equidae | <i>Equus</i> | sp. | -999  | -                          | Hearne gravel pits             | Robertson    | Pleistocene   | Present study   | M               | length of molar                       | 2.69 | 2.96  | 344.3                                                                                                   | y mass, kg) = average[3.187*Log(LM1, cm) + 1.264, 3.01*Log(LM2, cm) + 1.216, 2.99*Log(LM3, cm) + 1.209] | 0.99 | 16.5                                  | Table 16.8, Damuth and MacFadden 1990                 |
| Perissodactyla | Equidae | <i>Equus</i> | sp. | 3     | 2586                       | Pittsbridge                    | Brazos       | Pleistocene   | Present study   | LM1             | length of first lower molar           | 2.53 | 2.22  | 351.6                                                                                                   | Log(Body mass, kg) = 3.187*Log(LM1, cm) + 1.264                                                         | 0.99 | 16.5                                  | Table 16.8, Damuth and MacFadden 1990                 |
| Perissodactyla | Equidae | <i>Equus</i> | sp. | -999  | -                          | Hearne gravel pits             | Robertson    | Pleistocene   | Present study   | M               | length of molar                       | 2.71 | 3.30  | 353.6                                                                                                   | y mass, kg) = average[3.187*Log(LM1, cm) + 1.264, 3.01*Log(LM2, cm) + 1.216, 2.99*Log(LM3, cm) + 1.209] | 0.99 | 16.5                                  | Table 16.8, Damuth and MacFadden 1990                 |
| Perissodactyla | Equidae | <i>Equus</i> | sp. | 5     | B                          | Cameron (Brown-Crawford)       | Milam        | Pleistocene   | Present study   | M               | length of molar                       | 2.71 | 1.75  | 354.4                                                                                                   | y mass, kg) = average[3.187*Log(LM1, cm) + 1.264, 3.01*Log(LM2, cm) + 1.216, 2.99*Log(LM3, cm) + 1.209] | 0.99 | 16.5                                  | Table 16.8, Damuth and MacFadden 1990                 |
| Perissodactyla | Equidae | <i>Equus</i> | sp. | 16    | 2372                       | San Felipe                     | Austin       | Pleistocene   | Present study   | UM1             | length of first upper molar           | 2.90 | 2.72  | 354.8                                                                                                   | Log(Body mass, kg) = 2.9*Log(UM2, cm) + 1.209                                                           | 0.96 | 30.5                                  | Table 16.8, Damuth and MacFadden 1990                 |
| Perissodactyla | Equidae | <i>Equus</i> | sp. | 2384  | unknown                    | Cameron (Curry Gravel Pit)     | Milam        | Pleistocene   | Present study   | UM2             | length of second upper molar          | 2.90 | 2.88  | 354.8                                                                                                   | Log(Body mass, kg) = 2.9*Log(UM2, cm) + 1.209                                                           | 0.96 | 30.5                                  | Table 16.8, Damuth and MacFadden 1990                 |
| Perissodactyla | Equidae | <i>Equus</i> | sp. | 30967 | 1770                       | Ingleside                      | San Patricio | Pleistocene   | Lundelius 1972b | LM1             | length of first lower molar           | 2.54 | 1.41  | 358.3                                                                                                   | Log(Body mass, kg) = 3.187*Log(LM1, cm) + 1.264                                                         | 0.99 | 16.5                                  | Table 16.8, Damuth and MacFadden 1990                 |
| Perissodactyla | Equidae | <i>Equus</i> | sp. | -     | 122                        | Cameron (SUSTR P14, 2.5 mi. E) | Milam        | Pleistocene   | Present study   | M2              | length of second molar                | 2.84 | 2.86  | 358.8                                                                                                   | Log(Body mass, kg) = Average[3.01*Log(LM2, cm) + 1.216, 2.9*LOG(UM2, cm) + 1.209]                       | 0.99 | 16.9                                  | Table 16.8, Damuth and MacFadden 1990                 |
| Perissodactyla | Equidae | <i>Equus</i> | sp. | 3     | 2556                       | Pittsbridge                    | Brazos       | Pleistocene   | Present study   | LM1             | length of first lower molar           | 2.54 | 2.09  | 360.1                                                                                                   | Log(Body mass, kg) = 3.187*Log(LM1, cm) + 1.264                                                         | 0.99 | 16.5                                  | Table 16.8, Damuth and MacFadden 1990                 |
| Perissodactyla | Equidae | <i>Equus</i> | sp. | 31034 | 36                         | O'Brian Ranch                  | Bee          | Pleistocene   | Present study   | LM1 or LM2      | length of first or second lower molar | 2.66 | 1.99  | 361.7                                                                                                   | Log(Body mass, kg) = average[3.187*Log(LM1, cm) + 1.264, 3.01*Log(LM2, cm) + 1.216]                     | 0.99 | 16.5                                  | Perissodactyla, Table 16.8, Damuth and MacFadden 1990 |
| Perissodactyla | Equidae | <i>Equus</i> | sp. | 2351  | 28                         | Cameron (Curry Gravel Pit)     | Milam        | Pleistocene   | Present study   | M               | length of molar                       | 2.73 | 1.99  | 361.7                                                                                                   | y mass, kg) = average[3.187*Log(LM1, cm) + 1.264, 3.01*Log(LM2, cm) + 1.216, 2.99*Log(LM3, cm) + 1.209] | 0.99 | 16.5                                  | Table 16.8, Damuth and MacFadden 1990                 |
| Perissodactyla | Equidae | <i>Equus</i> | sp. | 31108 | 82                         | Old Glory                      | Stonewall    | Pleistocene   | Present study   | UM3             | length of third upper molar           | 2.93 | 2.25  | 365.5                                                                                                   | Log(Body mass, kg) = 2.9*Log(UM2, cm) + 1.209                                                           | 0.96 | 30.5                                  | Table 16.8, Damuth and MacFadden 1990                 |
| Perissodactyla | Equidae | <i>Equus</i> | sp. | 892   | 223                        | Lubbock Lake                   | Lubbock      | Pleistocene   | Present study   | UM2             | length of second upper molar          | 2.93 | 2.08  | 365.9                                                                                                   | Log(Body mass, kg) = 2.9*Log(UM2, cm) + 1.209                                                           | 0.96 | 30.5                                  | Table 16.8, Damuth and MacFadden 1990                 |
| Perissodactyla | Equidae | <i>Equus</i> | sp. | 3     | 2187                       | Pittsbridge                    | Brazos       | Pleistocene   | Present study   | LM1             | length of first lower molar           | 2.56 | 1.75  | 366.9                                                                                                   | Log(Body mass, kg) = 3.187*Log(LM1, cm) + 1.264                                                         | 0.99 | 16.5                                  | Table 16.8, Damuth and MacFadden 1990                 |
| Perissodactyla | Equidae | <i>Equus</i> | sp. | 121   | Cameron (Curry Gravel Pit) | Milam                          | Pleistocene  | Present study | M               | length of molar | 2.75                                  | 2.59 | 370.4 | y mass, kg) = average[3.187*Log(LM1, cm) + 1.264, 3.01*Log(LM2, cm) + 1.216, 2.99*Log(LM3, cm) + 1.209] | 0.99                                                                                                    | 16.5 | Table 16.8, Damuth and MacFadden 1990 |                                                       |
| Perissodactyla | Equidae | <i>Equus</i> | sp. | -     | A                          | Cameron (SUSTR P14, 2.5 mi. E) | Milam        | Pleistocene   | Present study   | M               | length of molar                       | 2.75 | 2.70  | 370.8                                                                                                   | y mass, kg) = average[3.187*Log(LM1, cm) + 1.264, 3.01*Log(LM2, cm) + 1.216, 2.99*Log(LM3, cm) + 1.209] | 0.99 | 16.5                                  | Table 16.8, Damuth and MacFadden 1990                 |
| Perissodactyla | Equidae | <i>Equus</i> | sp. | 2384  | unknown                    | Cameron (Curry Gravel Pit)     | Milam        | Pleistocene   | Present study   | UP3             | length of third upper premolar        | 2.51 | 2.70  | 371.6                                                                                                   | Log(Body mass, kg) = 2.965*Log(LP3, cm) + 1.383                                                         | 0.96 | 37.60                                 | Table 16.8, Damuth and MacFadden 1990                 |
| Perissodactyla | Equidae | <i>Equus</i> | sp. | 3     | 2352                       | Pittsbridge                    | Brazos       | Pleistocene   | Present study   | M               | length of molar                       | 2.76 | 2.93  | 372.0                                                                                                   | y mass, kg) = average[3.187*Log(LM1, cm) + 1.264, 3.01*Log(LM2, cm) + 1.216, 2.99*Log(LM3, cm) + 1.209] | 0.99 | 16.5                                  | Table 16.8, Damuth and MacFadden 1990                 |
| Perissodactyla | Equidae | <i>Equus</i> | sp. | 2351  | 29                         | Cameron (Curry Gravel Pit)     | M            |               |                 |                 |                                       |      |       |                                                                                                         |                                                                                                         |      |                                       |                                                       |





|                |         |              |     |       |         |                            |              |             |                 |       |                                          |      |      |       |                                                                                              |                                                                                    |       |                                                             |                                                       |
|----------------|---------|--------------|-----|-------|---------|----------------------------|--------------|-------------|-----------------|-------|------------------------------------------|------|------|-------|----------------------------------------------------------------------------------------------|------------------------------------------------------------------------------------|-------|-------------------------------------------------------------|-------------------------------------------------------|
| Perissodactyla | Equidae | <i>Equus</i> | sp. | -999  |         | Hearne gravel pits         | Robertson    | Pleistocene | Present study   | M     | length of molar                          | 3.19 | 1.73 | 583.8 | y mass, kg)=average(3.187*Log(LM1, cm) + 1.264, 3.01*Log(LM2, cm) + 1.216, 2.99*Log(LM3, cm) | 0.99                                                                               | 16.5  | Table 16.8, Damuth and MacFadden 1990                       |                                                       |
| Perissodactyla | Equidae | <i>Equus</i> | sp. | -999  |         | Hearne gravel pits         | Robertson    | Pleistocene | Present study   | M     | length of molar                          | 3.19 | 3.01 | 586.1 | y mass, kg)=average(3.187*Log(LM1, cm) + 1.264, 3.01*Log(LM2, cm) + 1.216, 2.99*Log(LM3, cm) | 0.99                                                                               | 16.5  | Table 16.8, Damuth and MacFadden 1990                       |                                                       |
| Perissodactyla | Equidae | <i>Equus</i> | sp. | 30967 | 3112    | Ingleside                  | San Patricio | Pleistocene | Landelius 1972b | UM3   | length of third upper molar              | R    | 3.45 | 2.41  | 587.1                                                                                        | Log(Body mass, kg) = 2.9*Log(UM2, cm) + 1.209                                      | 0.96  | 30.5                                                        | Table 16.8, Damuth and MacFadden 1990                 |
| Perissodactyla | Equidae | <i>Equus</i> | sp. | -999  |         | Hearne gravel pits         | Robertson    | Pleistocene | Present study   | M     | length of molar                          | 3.20 | 3.09 | 595.5 | y mass, kg)=average(3.187*Log(LM1, cm) + 1.264, 3.01*Log(LM2, cm) + 1.216, 2.99*Log(LM3, cm) | 0.99                                                                               | 16.5  | Table 16.8, Damuth and MacFadden 1990                       |                                                       |
| Perissodactyla | Equidae | <i>Equus</i> | sp. | 2187  | 3112    | Pittsbridge                | Brazos       | Pleistocene | Present study   | P1    | length of first premolar                 | P1   | 2.98 | 1.54  | 594.7                                                                                        | Log(Body mass, kg) = average(2.965*Log(LP3, cm) + 1.383, 3.09*Log(LP4) + 1.29)     | 0.99  | 16.5                                                        | Table 16.8, Damuth and MacFadden 1990                 |
| Perissodactyla | Equidae | <i>Equus</i> | sp. | -999  |         | Hearne gravel pits         | Robertson    | Pleistocene | Present study   | M     | length of molar                          | 3.21 | 3.46 | 596.5 | y mass, kg)=average(3.187*Log(LM1, cm) + 1.264, 3.01*Log(LM2, cm) + 1.216, 2.99*Log(LM3, cm) | 0.99                                                                               | 16.5  | Table 16.8, Damuth and MacFadden 1990                       |                                                       |
| Perissodactyla | Equidae | <i>Equus</i> | sp. | 30839 | 84      | Morhous Mound              | Victoria     | Pleistocene | Present study   | LM1   | length of first lower molar              | L    | 2.98 | 2.00  | 598.0                                                                                        | Log(Body mass, kg) = 3.187*Log(LM1, cm) + 1.264                                    | 0.99  | 16.5                                                        | Table 16.8, Damuth and MacFadden 1990                 |
| Perissodactyla | Equidae | <i>Equus</i> | sp. | 31034 | 66      | O'Brian Ranch              | Bee          | Pleistocene | Present study   | LM1   | length of first lower molar              | L    | 2.98 | 2.06  | 598.0                                                                                        | Log(Body mass, kg) = 3.187*Log(LM1, cm) + 1.264                                    | 0.99  | 16.5                                                        | Table 16.8, Damuth and MacFadden 1990                 |
| Perissodactyla | Equidae | <i>Equus</i> | sp. | 892   | 299     | Lubbock Lake               | Lubbock      | Pleistocene | Present study   | M3    | length of third molar                    | M3   | 3.46 | 1.39  | 598.1                                                                                        | Log(Body mass, kg) = 2.999*Log(LM3, cm) + 1.162                                    | 0.99  | 18.0                                                        | Perissodactyla, Table 16.8, Damuth and MacFadden 1990 |
| Perissodactyla | Equidae | <i>Equus</i> | sp. | -999  |         | Hearne gravel pits         | Robertson    | Pleistocene | Present study   | M     | length of molar                          | 3.22 | 1.99 | 600.9 | y mass, kg)=average(3.187*Log(LM1, cm) + 1.264, 3.01*Log(LM2, cm) + 1.216, 2.99*Log(LM3, cm) | 0.99                                                                               | 16.5  | Table 16.8, Damuth and MacFadden 1990                       |                                                       |
| Perissodactyla | Equidae | <i>Equus</i> | sp. | -999  |         | Hearne gravel pits         | Robertson    | Pleistocene | Present study   | M     | length of molar                          | 3.22 | 3.29 | 600.9 | y mass, kg)=average(3.187*Log(LM1, cm) + 1.264, 3.01*Log(LM2, cm) + 1.216, 2.99*Log(LM3, cm) | 0.99                                                                               | 16.5  | Table 16.8, Damuth and MacFadden 1990                       |                                                       |
| Perissodactyla | Equidae | <i>Equus</i> | sp. | 31041 | 2       | Bravo river                | Brazos       | Pleistocene | Present study   | M1    | length of first molar                    | M1   | 3.00 | 1.74  | 606.4                                                                                        | Log(Body mass, kg) = 3.187*Log(LM1, cm) + 1.264                                    | 0.99  | 16.5                                                        | Table 16.8, Damuth and MacFadden 1990                 |
| Perissodactyla | Equidae | <i>Equus</i> | sp. | 31108 | 2       | Salt Fork Brazos River     | Stonewall    | Pleistocene | Present study   | LM1   | length of first lower molar              | L    | 3.00 | 2.07  | 609.0                                                                                        | Log(Body mass, kg) = 3.187*Log(LM1, cm) + 1.264                                    | 0.99  | 16.5                                                        | Table 16.8, Damuth and MacFadden 1990                 |
| Perissodactyla | Equidae | <i>Equus</i> | sp. | 31108 | 82      | Old Glory                  | Stonewall    | Pleistocene | Present study   | UM1   | length of first upper molar              | L    | 3.50 | 3.43  | 611.1                                                                                        | Log(Body mass, kg) = 2.9*Log(UM2, cm) + 1.209                                      | 0.96  | 30.5                                                        | Table 16.8, Damuth and MacFadden 1990                 |
| Perissodactyla | Equidae | <i>Equus</i> | sp. | 3     | 2352    | Pittsbridge                | Brazos       | Pleistocene | Present study   | P1    | length of first premolar                 | P1   | 3.01 | 1.51  | 612.9                                                                                        | Log(Body mass, kg) = average(2.965*Log(LP3, cm) + 1.383, 3.09*Log(LP4) + 1.29)     | 0.99  | 16.5                                                        | Table 16.8, Damuth and MacFadden 1990                 |
| Perissodactyla | Equidae | <i>Equus</i> | sp. | 2271  | -999    | Cameron (Curry Gravel Pit) | Milam        | Pleistocene | Present study   | P1    | length of first premolar                 | P1   | 3.02 | 1.35  | 616.6                                                                                        | Log(Body mass, kg) = average(2.965*Log(LP3, cm) + 1.383, 3.09*Log(LP4) + 1.29)     | 0.99  | 16.5                                                        | Table 16.8, Damuth and MacFadden 1990                 |
| Perissodactyla | Equidae | <i>Equus</i> | sp. | -999  |         | Hearne gravel pits         | Robertson    | Pleistocene | Present study   | M     | length of molar                          | 3.25 | 1.58 | 618.3 | y mass, kg)=average(3.187*Log(LM1, cm) + 1.264, 3.01*Log(LM2, cm) + 1.216, 2.99*Log(LM3, cm) | 0.99                                                                               | 16.5  | Table 16.8, Damuth and MacFadden 1990                       |                                                       |
| Perissodactyla | Equidae | <i>Equus</i> | sp. | 31112 | 47      | Old Glory                  | Stonewall    | Pleistocene | Present study   | LM2   | length of second lower molar             | L    | 3.34 | 1.47  | 619.0                                                                                        | Log(Body mass, kg) = 3.01*Log(LM2, cm) + 1.216                                     | 0.99  | 16.9                                                        | Perissodactyla, Table 16.8, Damuth and MacFadden 1990 |
| Perissodactyla | Equidae | <i>Equus</i> | sp. | 3     | -999    | Pittsbridge                | Brazos       | Pleistocene | Present study   | M     | length of molar                          | 3.25 | 1.56 | 620.7 | y mass, kg)=average(3.187*Log(LM1, cm) + 1.264, 3.01*Log(LM2, cm) + 1.216, 2.99*Log(LM3, cm) | 0.99                                                                               | 16.5  | Table 16.8, Damuth and MacFadden 1990                       |                                                       |
| Perissodactyla | Equidae | <i>Equus</i> | sp. | 2351  | 22      | Cameron (Curry Gravel Pit) | Milam        | Pleistocene | Present study   | M     | length of molar                          | 3.26 | 2.00 | 622.4 | y mass, kg)=average(3.187*Log(LM1, cm) + 1.264, 3.01*Log(LM2, cm) + 1.216, 2.99*Log(LM3, cm) | 0.99                                                                               | 16.5  | Table 16.8, Damuth and MacFadden 1990                       |                                                       |
| Perissodactyla | Equidae | <i>Equus</i> | sp. | -999  |         | Hearne gravel pits         | Robertson    | Pleistocene | Present study   | M     | length of molar                          | 3.26 | 2.83 | 624.8 | y mass, kg)=average(3.187*Log(LM1, cm) + 1.264, 3.01*Log(LM2, cm) + 1.216, 2.99*Log(LM3, cm) | 0.99                                                                               | 16.5  | Table 16.8, Damuth and MacFadden 1990                       |                                                       |
| Perissodactyla | Equidae | <i>Equus</i> | sp. | 3     | 2356    | Pittsbridge                | Brazos       | Pleistocene | Present study   | M3    | length of third molar                    | M3   | 3.51 | 1.73  | 626.1                                                                                        | Log(Body mass, kg) = 2.999*Log(LM3, cm) + 1.162                                    | 0.99  | 18.0                                                        | Perissodactyla, Table 16.8, Damuth and MacFadden 1990 |
| Perissodactyla | Equidae | <i>Equus</i> | sp. | 908   | 2359    | Kincaid Shelter            | Uvalde       | Pleistocene | Present study   | P1    | length of molar                          | 3.26 | 2.31 | 626.6 | y mass, kg)=average(3.187*Log(LM1, cm) + 1.264, 3.01*Log(LM2, cm) + 1.216, 2.99*Log(LM3, cm) | 0.99                                                                               | 16.5  | Table 16.8, Damuth and MacFadden 1990                       |                                                       |
| Perissodactyla | Equidae | <i>Equus</i> | sp. | 908   | 2455    | Kincaid Shelter            | Uvalde       | Pleistocene | Present study   | dRUP3 | length of deciduous upper third premolar | L    | 3.04 | 1.68  | 627.8                                                                                        | Log(Body mass, kg) = average(2.965*Log(LP3, cm) + 1.383, 3.09*Log(LP4, cm) + 1.29) | 0.99  | 16.5                                                        | Table 16.8, Damuth and MacFadden 1990                 |
| Perissodactyla | Equidae | <i>Equus</i> | sp. | -999  |         | Hearne gravel pits         | Robertson    | Pleistocene | Present study   | M     | length of molar                          | 3.27 | 2.08 | 629.5 | y mass, kg)=average(3.187*Log(LM1, cm) + 1.264, 3.01*Log(LM2, cm) + 1.216, 2.99*Log(LM3, cm) | 0.99                                                                               | 16.5  | Table 16.8, Damuth and MacFadden 1990                       |                                                       |
| Perissodactyla | Equidae | <i>Equus</i> | sp. | 2271  | -999    | Cameron (Curry Gravel Pit) | Milam        | Pleistocene | Present study   | P     | length of premolar                       | 3.04 | 3.01 | 631.0 | Log(Body mass, kg) = Average(2.965*Log(LP3, cm) + 1.383, 3.09*Log(LP4, cm) + 1.29)           | 0.99                                                                               | 16.5  | Table 16.8, Damuth and MacFadden 1990                       |                                                       |
| Perissodactyla | Equidae | <i>Equus</i> | sp. | 3     | 2352    | Pittsbridge                | Brazos       | Pleistocene | Present study   | M     | length of molar                          | 3.27 | 2.52 | 631.9 | y mass, kg)=average(3.187*Log(LM1, cm) + 1.264, 3.01*Log(LM2, cm) + 1.216, 2.99*Log(LM3, cm) | 0.99                                                                               | 16.5  | Table 16.8, Damuth and MacFadden 1990                       |                                                       |
| Perissodactyla | Equidae | <i>Equus</i> | sp. | 3     | 2352    | Pittsbridge                | Brazos       | Pleistocene | Present study   | M     | length of molar                          | 3.28 | 2.51 | 633.7 | y mass, kg)=average(3.187*Log(LM1, cm) + 1.264, 3.01*Log(LM2, cm) + 1.216, 2.99*Log(LM3, cm) | 0.99                                                                               | 16.5  | Table 16.8, Damuth and MacFadden 1990                       |                                                       |
| Perissodactyla | Equidae | <i>Equus</i> | sp. | 31108 | 115     | Old Glory                  | Stonewall    | Pleistocene | Present study   | LM1   | length of first lower molar              | L    | 3.04 | 2.08  | 637.0                                                                                        | Log(Body mass, kg) = 3.187*Log(LM1, cm) + 1.264                                    | 0.99  | 16.5                                                        | Table 16.8, Damuth and MacFadden 1990                 |
| Perissodactyla | Equidae | <i>Equus</i> | sp. | 3     | 2352    | Pittsbridge                | Brazos       | Pleistocene | Present study   | M     | length of molar                          | 3.28 | 1.72 | 638.5 | y mass, kg)=average(3.187*Log(LM1, cm) + 1.264, 3.01*Log(LM2, cm) + 1.216, 2.99*Log(LM3, cm) | 0.99                                                                               | 16.5  | Table 16.8, Damuth and MacFadden 1990                       |                                                       |
| Perissodactyla | Equidae | <i>Equus</i> | sp. | 3     | 2352    | Pittsbridge                | Brazos       | Pleistocene | Present study   | M     | length of molar                          | 3.30 | 2.09 | 646.9 | y mass, kg)=average(3.187*Log(LM1, cm) + 1.264, 3.01*Log(LM2, cm) + 1.216, 2.99*Log(LM3, cm) | 0.99                                                                               | 16.5  | Table 16.8, Damuth and MacFadden 1990                       |                                                       |
| Perissodactyla | Equidae | <i>Equus</i> | sp. | 2351  | 12      | Cameron (Curry Gravel Pit) | Milam        | Pleistocene | Present study   | M     | length of molar                          | 3.30 | 1.86 | 648.1 | y mass, kg)=average(3.187*Log(LM1, cm) + 1.264, 3.01*Log(LM2, cm) + 1.216, 2.99*Log(LM3, cm) | 0.99                                                                               | 16.5  | Table 16.8, Damuth and MacFadden 1990                       |                                                       |
| Perissodactyla | Equidae | <i>Equus</i> | sp. | 3     | 2352    | Sealy                      | Austin       | Pleistocene | Present study   | P1    | length of first premolar                 | P1   | 3.07 | 1.55  | 648.7                                                                                        | Log(Body mass, kg) = average(2.965*Log(LP3, cm) + 1.383, 3.09*Log(LP4) + 1.29)     | 0.99  | 16.5                                                        | Table 16.8, Damuth and MacFadden 1990                 |
| Perissodactyla | Equidae | <i>Equus</i> | sp. | 2351  | 20      | Cameron (Curry Gravel Pit) | Milam        | Pleistocene | Present study   | M     | length of molar                          | 3.31 | 2.12 | 651.1 | y mass, kg)=average(3.187*Log(LM1, cm) + 1.264, 3.01*Log(LM2, cm) + 1.216, 2.99*Log(LM3, cm) | 0.99                                                                               | 16.5  | Table 16.8, Damuth and MacFadden 1990                       |                                                       |
| Perissodactyla | Equidae | <i>Equus</i> | sp. | 3     | 2352    | Pittsbridge                | Brazos       | Pleistocene | Present study   | M     | length of molar                          | 3.31 | 2.79 | 651.1 | y mass, kg)=average(3.187*Log(LM1, cm) + 1.264, 3.01*Log(LM2, cm) + 1.216, 2.99*Log(LM3, cm) | 0.99                                                                               | 16.5  | Table 16.8, Damuth and MacFadden 1990                       |                                                       |
| Perissodactyla | Equidae | <i>Equus</i> | sp. | 101   | 3047    | n/a                        | n/a          | Pleistocene | Present study   | LP3   | length of third lower premolar           | 3.05 | 2.26 | 656.5 | Log(Body mass, kg) = 2.965*Log(LP3, cm) + 1.383                                              | 0.96                                                                               | 37.60 | Table 16.8, Damuth and MacFadden 1990                       |                                                       |
| Perissodactyla | Equidae | <i>Equus</i> | sp. | 3     | 2352    | Quincy Creek               | Madley       | Pleistocene | Present study   | AA4   | cross-sectional area of astragalus       | 5.83 | 6.02 | 660.8 | Log(Body mass, kg) = 4.463*Log(AA4, mm) + 0.633                                              | 0.97                                                                               | 47.5  | all terrestrial mammals, Table 1 - Terrestrial Mammals 2014 |                                                       |
| Perissodactyla | Equidae | <i>Equus</i> | sp. | 31108 | 30      | Old Glory                  | Stonewall    | Pleistocene | Present study   | LM1   | length of first lower molar              | R    | 3.09 | 1.84  | 667.0                                                                                        | Log(Body mass, kg) = 3.187*Log(LM1, cm) + 1.264                                    | 0.99  | 16.5                                                        | Table 16.8, Damuth and MacFadden 1990                 |
| Perissodactyla | Equidae | <i>Equus</i> | sp. | 908   | 1284    | Friessenhahn Cave          | Bear         | Pleistocene | Present study   | P1    | length of first premolar                 | P1   | 3.10 | 3.46  | 668.0                                                                                        | Log(Body mass, kg) = average(2.965*Log(LP3, cm) + 1.383, 3.09*Log(LP4, cm) + 1.29) | 0.99  | 16.5                                                        | Table 16.8, Damuth and MacFadden 1990                 |
| Perissodactyla | Equidae | <i>Equus</i> | sp. | -999  |         | Hearne gravel pits         | Robertson    | Pleistocene | Present study   | M     | length of molar                          | 3.34 | 1.89 | 670.2 | y mass, kg)=average(3.187*Log(LM1, cm) + 1.264, 3.01*Log(LM2, cm) + 1.216, 2.99*Log(LM3, cm) | 0.99                                                                               | 16.5  | Table 16.8, Damuth and MacFadden 1990                       |                                                       |
| Perissodactyla | Equidae | <i>Equus</i> | sp. | 3     | 2352    | Pittsbridge                | Brazos       | Pleistocene | Present study   | M     | length of molar                          | 3.34 | 2.80 | 673.9 | y mass, kg)=average(3.187*Log(LM1, cm) + 1.264, 3.01*Log(LM2, cm) + 1.216, 2.99*Log(LM3, cm) | 0.99                                                                               | 16.5  | Table 16.8, Damuth and MacFadden 1990                       |                                                       |
| Perissodactyla | Equidae | <i>Equus</i> | sp. | 3     | -999    | Pittsbridge                | Brazos       | Pleistocene | Present study   | M     | length of molar                          | 3.36 | 2.82 | 684.5 | y mass, kg)=average(3.187*Log(LM1, cm) + 1.264, 3.01*Log(LM2, cm) + 1.216, 2.99*Log(LM3, cm) | 0.99                                                                               | 16.5  | Table 16.8, Damuth and MacFadden 1990                       |                                                       |
| Perissodactyla | Equidae | <i>Equus</i> | sp. | 2196L | unknown | Cameron (Curry Gravel Pit) | Milam        | Pleistocene | Present study   | M     | length of molar                          | 3.37 | 2.96 | 691.4 | y mass, kg)=average(3.187*Log(LM1, cm) + 1.264, 3.01*Log(LM2, cm) + 1.216, 2.99*Log(LM3, cm) | 0.99                                                                               | 16.5  | Table 16.8, Damuth and MacFadden 1990                       |                                                       |
| Perissodactyla | Equidae | <i>Equus</i> | sp. | -999  |         | Hearne gravel pits         | Robertson    | Pleistocene | Present study   | M     | length of molar                          | 3.38 | 2.94 | 697.8 | y mass, kg)=average(3.187*Log(LM1, cm) + 1.264, 3.01*Log(LM2, cm) + 1.216, 2.99*Log(LM3, cm) | 0.99                                                                               | 16.5  | Table 16.8, Damuth and MacFadden 1990                       |                                                       |
| Perissodactyla | Equidae | <i>Equus</i> | sp. | 2351  | 3       | Cameron (Curry Gravel Pit) | Milam        | Pleistocene | Present study   | M     | length of molar                          | 3.15 | 1.39 | 706.5 | Log(Body mass, kg) = average(2.965*Log(LP3, cm) + 1.383, 3.09*Log(LP4) + 1.29)               | 0.99                                                                               | 16.5  | Table 16.8, Damuth and MacFadden 1990                       |                                                       |
| Perissodactyla | Equidae | <i>Equus</i> | sp. | 3     | 2352    | Pittsbridge                | Brazos       | Pleistocene | Present study   | M     | length of molar                          | 3.40 | 2.19 | 711.9 | y mass, kg)=average(3.187*Log(LM1, cm) + 1.264, 3.01*Log(LM2, cm) + 1.216, 2.99*Log(LM3, cm) | 0.99                                                                               | 16.5  | Table 16.8, Damuth and MacFadden 1990                       |                                                       |
| Perissodactyla | Equidae | <i>Equus</i> | sp. | 908   | 1       | Scharbauer Ranch           | Midland      | Pleistocene | Present study   | LM1   | length of first lower molar              | R    | 3.17 | 2.41  | 712.7                                                                                        | Log(Body mass, kg) = Average(2.965*Log(LP3, cm) + 1.383, 3.09*Log(LP4, cm) + 1.29) | 0.99  | 16.5                                                        | Table 16.8, Damuth and MacFadden 1990                 |
| Perissodactyla | Equidae | <i>Equus</i> | sp. | 3     | -999    | Brazos river               | Brazos       | Pleistocene | Present study   | M1    | length of first premolar                 | P1   | 3.19 | 2.05  | 728.4                                                                                        | Log(Body mass, kg) = average(2.965*Log(LP3, cm) + 1.383, 3.09*Log(LP4) + 1.29)     | 0.99  | 16.5                                                        | Table 16.8, Damuth and MacFadden 1990                 |
| Perissodactyla | Equidae | <i>Equus</i> | sp. | 3     | 2352    | Bravo river                | Brazos       | Pleistocene | Present study   | M1    | length of first molar                    | M1   | 3.19 | 1.84  | 736.9                                                                                        | Log(Body mass, kg) = 3.187*Log(LM1, cm) + 1.264                                    | 0.99  | 16.5                                                        | Table 16.8, Damuth and MacFadden 1990                 |
| Perissodactyla | Equidae | <i>Equus</i> | sp. | 3     | -999    | Hearne gravel pits         | Robertson    | Pleistocene | Present study   | M     | length of molar                          | 3.44 | 2.01 | 738.0 | y mass, kg)=average(3.187*Log(LM1, cm) + 1.264, 3.01*Log(LM2, cm) + 1.216, 2.99*Log(LM3, cm) | 0.99                                                                               | 16.5  | Table 16.8, Damuth and MacFadden 1990                       |                                                       |
| Perissodactyla | Equidae | <i>Equus</i> | sp. |       |         |                            |              |             |                 |       |                                          |      |      |       |                                                                                              |                                                                                    |       |                                                             |                                                       |

|               |                     |                             |                       |              |                            |                                    |                  |                    |                       |                                                   |                                                          |             |         |                 |                                                                                              |                                                                                  |                                                         |                                                      |                                                      |                                                     |                                                     |
|---------------|---------------------|-----------------------------|-----------------------|--------------|----------------------------|------------------------------------|------------------|--------------------|-----------------------|---------------------------------------------------|----------------------------------------------------------|-------------|---------|-----------------|----------------------------------------------------------------------------------------------|----------------------------------------------------------------------------------|---------------------------------------------------------|------------------------------------------------------|------------------------------------------------------|-----------------------------------------------------|-----------------------------------------------------|
| Perisodactyla | Tapiridae           | <i>Tapirus</i>              | <i>veroenis</i>       | 804          | 83                         | Montell shelter                    | Uvalde           | Pleistocene        | Present study         | UM                                                | length of upper molar                                    | 2.37        | 2.03    | 197.8           |                                                                                              | Log(Body mass, kg) = 2.9*Log(UM2,cm) + 1.209                                     | 0.96                                                    | 30.5                                                 | Perisodactyla, Table 16.8, Damuth and MacFadden 1990 |                                                     |                                                     |
| Perisodactyla | Tapiridae           | <i>Tapirus</i>              | <i>veroenis</i>       | 3            | 2219                       | Pinsbridge                         | Brazos           | Pleistocene        | Present study         | UM1                                               | length of first upper molar                              | 2.38        | 2.52    | 200.0           |                                                                                              | Log(Body mass, kg) = 2.9*Log(UM2,cm) + 1.209                                     | 0.96                                                    | 30.5                                                 | Table 16.8, Damuth and MacFadden 1990                |                                                     |                                                     |
| Perisodactyla | Tapiridae           | <i>Tapirus</i>              | <i>veroenis</i>       | 43407        | 43                         | Honey Creek Cave                   | Mason            | Pleistocene        | Present study         | LM or P1                                          | length of lower cheek tooth                              | 2.32        | 1.59    | 217.7           | y mass, kg=average[3.167*Log(LM1, cm) + 1.264, 3.01*Log(LM2, cm) + 1.216, 2.99*Log(LM3, cm)] | 0.99                                                                             | 16.5                                                    | Perisodactyla, Table 16.8, Damuth and MacFadden 1990 |                                                      |                                                     |                                                     |
| Perisodactyla | Tapiridae           | <i>Tapirus</i>              | <i>veroenis</i>       | 40449        | 400                        | Levi Shelter                       | Travis           | Pleistocene        | Present study         | UP2                                               | length of second upper premolar                          | 2.22        | 2.08    | 241.5           |                                                                                              | Log(Body mass, kg)= vaerage[2.965*Log(LP3, cm) + 1.383, 3.09*Log(LP4, cm)+ 1.29] | 0.96                                                    | 30.5                                                 | Table 16.8, Damuth and MacFadden 1990                |                                                     |                                                     |
| Perisodactyla | Tapiridae           | <i>Tapirus</i>              | <i>veroenis</i>       | 3            | 2219                       | Pinsbridge                         | Brazos           | Pleistocene        | Present study         | UM2                                               | length of second upper molar                             | 2.58        | 2.83    | 233.6           |                                                                                              | Log(Body mass, kg) = 2.9*Log(UM2,cm) + 1.209                                     | 0.99                                                    | 16.5                                                 | Table 16.8, Damuth and MacFadden 1990                |                                                     |                                                     |
| Perisodactyla | Tapiridae           | <i>Tapirus</i>              | <i>veroenis</i>       | 40449        | 404                        | Levi Shelter                       | Travis           | Pleistocene        | Present study         | UP2                                               | length of second upper premolar                          | 2.30        | 1.96    | 222.0           |                                                                                              | Log(Body mass, kg)= vaerage[2.965*Log(LP3, cm) + 1.383, 3.09*Log(LP4, cm)+ 1.29] | 0.96                                                    | 30.5                                                 | Table 16.8, Damuth and MacFadden 1990                |                                                     |                                                     |
| Perisodactyla | Tapiridae           | <i>Tapirus</i>              | <i>veroenis</i>       | 31024        | 1                          | Caldwell                           | Calhoun          | Pleistocene        | Present study         | LM1                                               | length of first lower molar                              | 2.36        | 1.80    | 382.3           |                                                                                              | Log(Body mass, kg) = 3.187*Log(LM1,cm) + 1.264                                   | 0.99                                                    | 16.5                                                 | Table 16.8, Damuth and MacFadden 1990                |                                                     |                                                     |
| Perisodactyla | Tapiridae           | <i>Tapirus</i>              | <i>veroenis</i>       | 30667        | 1237                       | Ingleside                          | San Patricio     | Pleistocene        | Lundelius 1972b       | LM1                                               | length of first lower molar                              | 2.42        | 307.1   | 307.1           |                                                                                              | Log(Body mass, kg) = 3.187*Log(LM1,cm) + 1.264                                   | 0.99                                                    | 16.5                                                 | Table 16.8, Damuth and MacFadden 1990                |                                                     |                                                     |
| Perisodactyla | Tapiridae           | <i>Tapirus</i>              | <i>veroenis</i>       | 3            | 2554                       | Pinsbridge                         | Brazos           | Pleistocene        | Present study         | M1                                                | length of first lower molar                              | 2.43        | 303.3   | 310.3           |                                                                                              | Log(Body mass, kg) = 3.187*Log(LM1,cm) + 1.264                                   | 0.99                                                    | 16.5                                                 | Table 16.8, Damuth and MacFadden 1990                |                                                     |                                                     |
| Perisodactyla | Tapiridae           | <i>Tapirus</i>              | <i>veroenis</i>       | 43407        | unknown                    | Honey Creek Cave                   | Mason            | Pleistocene        | Present study         | M1                                                | length of molar                                          | 2.89        | 2.13    | 542.4           |                                                                                              | Log(Body mass, kg) = 3.187*Log(LM1,cm) + 1.264                                   | 0.99                                                    | 16.5                                                 | Table 16.8, Damuth and MacFadden 1990                |                                                     |                                                     |
| Perisodactyla | Tapiridae           | <i>Tapirus</i>              | <i>veroenis</i>       | 933          | 973                        | Friesenhahn cave                   | Bezar            | Pleistocene        | Present study         | UP2                                               | length of second upper premolar                          | 2.31        | 2.20    | 273.4           |                                                                                              | Log(Body mass, kg)= vaerage[2.965*Log(LP3, cm) + 1.383, 3.09*Log(LP4, cm)+ 1.29] | 0.96                                                    | 30.5                                                 | Table 16.8, Damuth and MacFadden 1990                |                                                     |                                                     |
| Perisodactyla | Tapiridae           | <i>Tapirus</i>              | <i>veroenis</i>       | 933          | 973                        | Friesenhahn cave                   | Bezar            | Pleistocene        | Present study         | UM2                                               | length of second upper molar                             | 2.80        | 2.40    | 316.1           |                                                                                              | Log(Body mass, kg) = 2.9*Log(UM2,cm) + 1.209                                     | 0.99                                                    | 16.5                                                 | Table 16.8, Damuth and MacFadden 1990                |                                                     |                                                     |
| Perisodactyla | Tapiridae           | <i>Tapirus</i>              | <i>veroenis</i>       | 933          | 370                        | Pinsbridge                         | Bezar            | Pleistocene        | Present study         | LM1                                               | length of first lower molar                              | 2.47        | 1.74    | 326.0           |                                                                                              | Log(Body mass, kg) = 3.187*Log(LM1,cm) + 1.264                                   | 0.99                                                    | 16.5                                                 | Table 16.8, Damuth and MacFadden 1990                |                                                     |                                                     |
| Pilosa        | <i>indet.</i>       | <i>sp.</i>                  | 31041                 | 76           | Salt Fork Brazos River     | Stonewall                          | Pleistocene      | Present study      | FeMAPC                | midshaft anteroposterior circumference of femur   | 20.3                                                     |             | 1,270.2 |                 | Log(body mass, g) = 2.87355*Log(FeMAPC, mm) + 0.52682                                        | 0.98                                                                             | na                                                      | All mammals, Present Study                           |                                                      |                                                     |                                                     |
| Pilosa        | Megalonychiidae     | <i>Megalonyx</i>            | <i>jeffersoni</i>     | 30667        | 1407                       | Ingleside                          | San Patricio     | Pleistocene        | Lundelius 1972b       | HuL                                               | length of humerus                                        | 47.20       | 568.0   | 568.0           |                                                                                              | Log(Body mass, g) = 2.79712*Log(HuL, g) - 1.72502                                | 0.96                                                    | na                                                   | All mammals, Present Study                           |                                                     |                                                     |
| Pilosa        | Megalonychiidae     | <i>Megalonyx</i>            | <i>jeffersoni</i>     | 30667        | 1290                       | Ingleside                          | San Patricio     | Pleistocene        | Lundelius 1972b       | HuL                                               | length of humerus                                        | 47.60       | 581.5   | 581.5           |                                                                                              | Log(Body mass, g) = 2.79712*Log(HuL, g) - 1.72502                                | 0.96                                                    | na                                                   | All mammals, Present Study                           |                                                     |                                                     |
| Pilosa        | Megalonychiidae     | <i>Megalonyx</i>            | <i>jeffersoni</i>     | 43059        | 308                        | Wight Materials North              |                  | Pleistocene        | Present study         | HuMAPD                                            | midshaft anteroposterior diameter of humerus             | 6.76        |         | 1,204.2         |                                                                                              | Log(Body mass, g) = 2.66975*Log(HuMAPD*Pl, g) - 0.13193                          | 0.98                                                    | na                                                   | All mammals, Present Study                           |                                                     |                                                     |
| Pilosa        | Megalonychiidae     | <i>Megalonyx</i>            | <i>jeffersoni</i>     | 43059        | 303                        | Wight Materials North              |                  | Pleistocene        | Present study         | FeHD                                              | proximal end; diameter of femoral head                   |             | 14.10   | 7.46            |                                                                                              |                                                                                  |                                                         |                                                      |                                                      |                                                     |                                                     |
| Pilosa        | Megalonychiidae     | <i>Megalonyx</i>            | <i>jeffersoni</i>     | 43059        | 307                        | Wight Materials North              |                  | Pleistocene        | Present study         | HuHD                                              | proximal end; diameter of humerus head                   |             | 13.38   | 9.62            |                                                                                              |                                                                                  |                                                         |                                                      |                                                      |                                                     |                                                     |
| Pilosa        | Megalonychiidae     | <i>Megalonyx</i>            | <i>jeffersoni</i>     | 43059        | 311                        | Wight Materials North              |                  | Pleistocene        | Present study         | HuHD                                              | proximal end; diameter of humerus head                   |             | 10.37   | 7.57            |                                                                                              |                                                                                  |                                                         |                                                      |                                                      |                                                     |                                                     |
| Pilosa        | Megalonychiidae     | <i>Megalonyx</i>            | <i>jeffersoni</i>     | 43059        | 510                        | Wight Materials North<br>(Blunzer) |                  | Pleistocene        | Present study         | TiHD                                              | proximal end; diameter of tibia                          |             | 13.15   | 9.69            |                                                                                              |                                                                                  |                                                         |                                                      |                                                      |                                                     |                                                     |
| Pilosa        | Megalonychiidae     | <i>Megalonyx</i>            | <i>jeffersoni</i>     | 30667        | 1231                       | Ingleside                          | San Patricio     | Pleistocene        | Lundelius 1972b       | TiL                                               | length of tibia                                          |             | 31.00   |                 |                                                                                              |                                                                                  |                                                         |                                                      |                                                      |                                                     |                                                     |
| Pilosa        | Megatheriidae       | <i>Eremotherium</i>         | <i>sp.</i>            | 41075        | 10                         | Stanley E. Smith                   | Calhoun          | Pleistocene        | lonald and Lundelius: | HuL                                               | length of humerus                                        |             | 79.00   |                 | 2,398.8                                                                                      |                                                                                  | Log(Body mass, g) = 2.79712*Log(HuL, g) - 1.72502       | 0.96                                                 | na                                                   | All mammals, Present Study                          |                                                     |
| Pilosa        | Megatheriidae       | <i>Eremotherium</i>         | <i>sp.</i>            | 3            | 4000                       | Pinsbridge                         | Brazos           | Pleistocene        | Present study         | LM1                                               | length of first lower molar                              |             | 4.25    | 3.60            |                                                                                              |                                                                                  |                                                         |                                                      |                                                      |                                                     |                                                     |
| Pilosa        | Megatheriidae       | <i>Eremotherium</i>         | <i>sp.</i>            | 31141        | 6                          | Stanley E. Smith                   | Calhoun          | Pleistocene        | lonald and Lundelius: | M                                                 | molar                                                    |             |         | 3.60            |                                                                                              |                                                                                  |                                                         |                                                      |                                                      |                                                     |                                                     |
| Pilosa        | Megatheriidae       | <i>Eremotherium</i>         | <i>sp.</i>            | 31141        | 71                         | Stanley E. Smith                   | Calhoun          | Pleistocene        | lonald and Lundelius: | M                                                 | molar                                                    |             |         | 3.52            |                                                                                              |                                                                                  |                                                         |                                                      |                                                      |                                                     |                                                     |
| Pilosa        | Mylodontidae        | <i>Myodon</i>               | <i>sp.</i>            | 31052        | 3                          | Salt Fork Brazos River             | Stonewall        | Pleistocene        | Present study         | HuMAPC                                            | midshaft anteroposterior circumference of humeru         | R           | 30.5    |                 | 3,166.1                                                                                      |                                                                                  | Log(Body mass, g) = 2.66975*Log(HuMAPC, g) - 0.13193    | 0.98                                                 | na                                                   | All mammals, Present Study                          |                                                     |
| Pilosa        | Mylodontidae        | <i>Myodon</i>               | <i>sp.</i>            | 31108        | 72                         | Old Glory                          | Stonewall        | Pleistocene        | Present study         | LM1                                               | length of first lower molar                              | L           | 3.13    | 2.20            |                                                                                              |                                                                                  |                                                         |                                                      |                                                      |                                                     |                                                     |
| Pilosa        | Mylodontidae        | <i>Myodon</i>               | <i>sp.</i>            | 31041        | 63                         | Salt Fork Brazos River             | Stonewall        | Pleistocene        | Present study         | M                                                 | molar                                                    | R           | 3.87    | 2.55            |                                                                                              |                                                                                  |                                                         |                                                      |                                                      |                                                     |                                                     |
| Pilosa        | Mylodontidae        | <i>Myodon</i>               | <i>sp.</i>            | 31108        | 47                         | Old Glory                          | Stonewall        | Pleistocene        | Present study         | UM1                                               | first upper molar                                        | R           | 2.94    | 1.64            |                                                                                              |                                                                                  |                                                         |                                                      |                                                      |                                                     |                                                     |
| Pilosa        | Mylodontidae        | <i>Paramylobodon</i>        | <i>harlani</i>        | 43059        | 325                        | Salt Fork Brazos River             | Stonewall        | Pleistocene        | Present study         | HuMAPD                                            | midshaft anteroposterior diameter of humerus             | R           | 9.10    |                 | 2,662.8                                                                                      |                                                                                  | Log(Body mass, g) = 2.66975*Log(HuMAPD*Pl, g) - 0.13193 | 0.98                                                 | na                                                   | All mammals, Present Study                          |                                                     |
| <b>Pilosa</b> | <b>Mylodontidae</b> | <b><i>Paramylobodon</i></b> | <b><i>harlani</i></b> | <b>41052</b> | <b>11</b>                  | <b>Salt Fork Brazos River</b>      | <b>Stonewall</b> | <b>Pleistocene</b> | <b>Present study</b>  | <b>FeMAPC</b>                                     | <b>midshaft anteroposterior circumference of femur L</b> | <b>46.3</b> |         | <b>13,494.7</b> |                                                                                              | <b>Log(body mass, g) = 2.87355*Log(FeMAPC, mm) + 0.52682</b>                     | <b>0.98</b>                                             | <b>na</b>                                            | <b>All mammals, Present Study</b>                    |                                                     |                                                     |
| Pilosa        | Mylodontidae        | <i>Paramylobodon</i>        | <i>harlani</i>        | 30667        | 1428                       | Ingleside                          | San Patricio     | Pleistocene        | Lundelius 1972b       | FeL                                               | length of femur                                          | L           | 47.60   | 408.9           |                                                                                              | Log(Body mass, g) = 2.90780*Log(FeL, mm) - 2.17447                               | 0.94                                                    | na                                                   | All mammals, Present Study                           |                                                     |                                                     |
| Pilosa        | Mylodontidae        | <i>Paramylobodon</i>        | <i>harlani</i>        | 30667        | 666                        | Ingleside                          | San Patricio     | Pleistocene        | Present study         | HuL                                               | length of humerus                                        | R           | 44.20   | 472.7           |                                                                                              | Log(Body mass, g) = 2.79712*Log(HuL, g) - 1.72502                                | 0.96                                                    | na                                                   | All mammals, Present Study                           |                                                     |                                                     |
| Pilosa        | Mylodontidae        | <i>Paramylobodon</i>        | <i>harlani</i>        | 30667        | 1414                       | Ingleside                          | San Patricio     | Pleistocene        | Present study         | HuL                                               | length of humerus                                        | R           | 45.20   | 503.2           |                                                                                              | Log(Body mass, g) = 2.79712*Log(HuL, g) - 1.72502                                | 0.96                                                    | na                                                   | All mammals, Present Study                           |                                                     |                                                     |
| Pilosa        | Mylodontidae        | <i>Paramylobodon</i>        | <i>harlani</i>        | 30667        | 1845                       | Ingleside                          | San Patricio     | Pleistocene        | Lundelius 1972b       | FeL                                               | length of femur                                          | L           | 52.00   | 528.8           |                                                                                              | Log(Body mass, g) = 2.90780*Log(FeL, mm) - 2.17447                               | 0.94                                                    | na                                                   | All mammals, Present Study                           |                                                     |                                                     |
| Pilosa        | Mylodontidae        | <i>Paramylobodon</i>        | <i>harlani</i>        | 30667        | 63                         | Ingleside                          | San Patricio     | Pleistocene        | Present study         | FeMAPD, FeL                                       | 1 anteroposterior diameter of femur; width across c      | R           | 15.90   | 17.60           | 842.9                                                                                        |                                                                                  | Log(Body mass, g) = 2.87355*Log(FeMAPC, mm) + 0.52683   | 0.98                                                 | na                                                   | All mammals, Present Study                          |                                                     |
| Pilosa        | Mylodontidae        | <i>Paramylobodon</i>        | <i>harlani</i>        | 30667        | 420                        | Ingleside                          | San Patricio     | Pleistocene        | Lundelius 1972b       | FeMAPD, FeL                                       | 1 anteroposterior diameter of femur; width across c      | L           | 16.20   | 18.00           | 899.1                                                                                        |                                                                                  | Log(Body mass, g) = 2.87355*Log(FeMAPC, mm) + 0.52682   | 0.98                                                 | na                                                   | All mammals, Present Study                          |                                                     |
| Pilosa        | Mylodontidae        | <i>Paramylobodon</i>        | <i>harlani</i>        | 30667        | 504                        | Ingleside                          | San Patricio     | Pleistocene        | Lundelius 1972b       | SKL                                               | length of skull                                          | --          | 50.20   |                 |                                                                                              |                                                                                  |                                                         |                                                      |                                                      |                                                     |                                                     |
| Pilosa        | Mylodontidae        | <i>Paramylobodon</i>        | <i>harlani</i>        | 30667        | 521                        | Ingleside                          | San Patricio     | Pleistocene        | Lundelius 1972b       | SKL                                               | length of skull                                          | --          | 50.00   |                 |                                                                                              |                                                                                  |                                                         |                                                      |                                                      |                                                     |                                                     |
| Pilosa        | Mylodontidae        | <i>Paramylobodon</i>        | <i>harlani</i>        | 30667        | 1813                       | Ingleside                          | San Patricio     | Pleistocene        | Lundelius 1972b       | SKL                                               | length of skull                                          | --          | 49.40   |                 |                                                                                              |                                                                                  |                                                         |                                                      |                                                      |                                                     |                                                     |
| Pilosa        | Mylodontidae        | <i>Paramylobodon</i>        | <i>harlani</i>        | 43067        | 24                         | Avenue site                        | Travis           | Pleistocene        | Lundelius 1992        | UM2 or LM1                                        | molar                                                    |             | 2.67    | 1.79            |                                                                                              |                                                                                  |                                                         |                                                      |                                                      |                                                     |                                                     |
| Pilosa        | Nothrotheriidae     | <i>Nothrotherops</i>        | <i>sp.</i>            | 43059        | 302                        | Wight Materials North              |                  | Pleistocene        | Present study         | FeB                                               | distal end; breadth of epicondyles of femur              | R           | 20.50   | 9.22            | 471.2                                                                                        |                                                                                  | Log(Body mass, kg) = 2.782*Log(FeB, cm) - 0.107         | 0.94                                                 | 22.0                                                 | ungulates, Table 16.7; Damuth and MacFadden 1990    |                                                     |
| Pilosa        | Nothrotheriidae     | <i>Nothrotherops</i>        | <i>sp.</i>            | 43059        | 314                        | Wight Materials North              |                  | Pleistocene        | Present study         | HuHD                                              | proximal end; diameter of humerus head                   | R           | 10.36   | 8.17            |                                                                                              |                                                                                  |                                                         |                                                      |                                                      |                                                     |                                                     |
| Pilosa        | Nothrotheriidae     | <i>Nothrotherops</i>        | <i>sp.</i>            | 43059        | 511                        | Wight Materials North<br>(Blunzer) |                  | Pleistocene        | Present study         | TiB                                               | distal end; breadth of tibia                             | R           | 11.09   | 5.33            |                                                                                              |                                                                                  |                                                         |                                                      |                                                      |                                                     |                                                     |
| Pilosa        | Nothrotheriidae     | <i>Nothrotherops</i>        | <i>sp.</i>            | 43059        | 513                        | Wight Materials North<br>(Blunzer) |                  | Pleistocene        | Present study         | TiB                                               | distal end; breadth of tibia                             | L           | 11.35   | 4.86            |                                                                                              |                                                                                  |                                                         |                                                      |                                                      |                                                     |                                                     |
| Pilosa        | Nothrotheriidae     | <i>Nothrotherops</i>        | <i>sp.</i>            | 31137        | 5                          | Old Glory                          | Stonewall        | Pleistocene        | Present study         | HuEB                                              | distal end; breadth of epicondyles of humerus            | R           | 16.40   | 16.40           | 2,934.6                                                                                      |                                                                                  | Log(Body mass, kg) = 2.6454*Log(HuEB, cm) + 0.2538      | 0.96                                                 | 19.0                                                 | Artiodactyla, Table 16.7; Damuth and MacFadden 1990 |                                                     |
| Proboscidea   | Elephantidae        | <i>indet.</i>               | <i>sp.</i>            | 30667        | 545                        | Ingleside                          | San Patricio     | Pleistocene        | Present study         | HuEB                                              | distal end; breadth of epicondyles of humerus            | 14.2        | 20.6    | 18.90           | 4,271.2                                                                                      |                                                                                  | Log(Body mass, kg) = 2.6454*Log(HuEB, cm) + 0.2538      | 0.96                                                 | 19.0                                                 | Artiodactyla, Table 16.7; Damuth and MacFadden 1990 |                                                     |
| Proboscidea   | Elephantidae        | <i>indet.</i>               | <i>sp.</i>            | 31030        | 22                         | Valley Farms                       | Navaro           | Pleistocene        | Present study         | HuEB                                              | distal end; breadth of epicondyles of humerus            | R           | 12      | 20.5            | 20.1                                                                                         | 5,295.6                                                                          |                                                         | Log(Body mass, kg) = 2.6454*Log(HuEB, cm) + 0.2538   | 0.96                                                 | 19.0                                                | Artiodactyla, Table 16.7; Damuth and MacFadden 1990 |
| Proboscidea   | Elephantidae        | <i>indet.</i>               | <i>sp.</i>            | 801          | 18                         | Reagan Gravel Pit                  | Howard           | Pleistocene        | Present study         | M                                                 | molar                                                    |             | 20.4    | 10.7            |                                                                                              |                                                                                  |                                                         |                                                      |                                                      |                                                     |                                                     |
| Proboscidea   | Elephantidae        | <i>Mammut americanum</i>    | 40481                 | 1            | Borrego Creek              | Atascosa                           | Pleistocene      | Present study      | HuMAPC                | midshaft anteroposterior circumference of humerus |                                                          | 45.5        |         | 7,907.6         |                                                                                              | Log(Body mass, kg) = 2.606*Log(HuMAPC, mm) + 1.60                                | 0.99                                                    | na                                                   | Table 1, Jukar et al. 2018                           |                                                     |                                                     |
| Proboscidea   | Elephantidae        | <i>Mammut americanum</i>    | 30667                 | 668          | Ingleside                  | San Patricio                       | Pleistocene      | Present study      | FeMAPC                | midshaft anteroposterior circumference of femur   |                                                          | 45.5        |         | 7,999.8         |                                                                                              | Log(Body mass, kg) = 2.607*Log(FeMAPC, mm) + 1.61                                | 0.99                                                    | na                                                   | Table 1, Jukar et al. 2018                           |                                                     |                                                     |
| Proboscidea   | Elephantidae        | <i>Mammut americanum</i>    | 16                    | 2138         | San Felipe                 | Austin                             | Pleistocene      | Present study      | BM                    | third molar? biggest molar                        |                                                          | 16.21       | 8.45    |                 |                                                                                              |                                                                                  |                                                         |                                                      |                                                      |                                                     |                                                     |
| Proboscidea   | Elephantidae        | <i>Mammut americanum</i>    | 137                   | 2149         | Trinity River              | Dallas                             | Pleistocene      | Present study      | BM                    | third molar? biggest molar                        |                                                          | 17.1        | 9       |                 |                                                                                              |                                                                                  |                                                         |                                                      |                                                      |                                                     |                                                     |
| Proboscidea   | Elephantidae        | <i>Mammut americanum</i>    | 3                     | 2150         | Pinsbridge                 | Brazos                             | Pleistocene      | Present study      | BM                    | third molar? biggest molar                        |                                                          | 15.2        | 9.71    |                 |                                                                                              |                                                                                  |                                                         |                                                      |                                                      |                                                     |                                                     |
| Proboscidea   | Elephantidae        | <i>Mammut americanum</i>    | 137                   | 2154         | Trinity River              | Dallas                             | Pleistocene      | Present study      | BM                    | third molar? biggest molar                        |                                                          | 20.6        | 10.5    |                 |                                                                                              |                                                                                  |                                                         |                                                      |                                                      |                                                     |                                                     |
| Proboscidea   | Elephantidae        | <i>Mammut americanum</i>    | 14                    | 2178         | Valley Junction Gravel Pit | Robertson                          | Pleistocene      | Present study      | BM                    | third molar? biggest molar                        |                                                          | 16.48       | 9.46    |                 |                                                                                              |                                                                                  |                                                         |                                                      |                                                      |                                                     |                                                     |
| Proboscidea   | Elephantidae        | <i>Mammut americanum</i>    | 830?                  | 2166-x       | Brazos river               | Brazos                             | Pleistocene      | Present study      | BM                    | big proboscidean molar                            |                                                          | 16.55       | 8.78    |                 |                                                                                              |                                                                                  |                                                         |                                                      |                                                      |                                                     |                                                     |
| Proboscidea   | Elephantidae        | <i>Mammut americanum</i>    | 14                    | 2178-x       |                            |                                    |                  |                    |                       |                                                   |                                                          |             |         |                 |                                                                                              |                                                                                  |                                                         |                                                      |                                                      |                                                     |                                                     |

|                    |                     |                           |            |              |                            |                        |                 |                    |                      |                                                   |                                                        |          |             |                                                  |                                                         |                                                      |                                                   |                                                                   |                            |                            |
|--------------------|---------------------|---------------------------|------------|--------------|----------------------------|------------------------|-----------------|--------------------|----------------------|---------------------------------------------------|--------------------------------------------------------|----------|-------------|--------------------------------------------------|---------------------------------------------------------|------------------------------------------------------|---------------------------------------------------|-------------------------------------------------------------------|----------------------------|----------------------------|
| Proboscidea        | Elephantidae        | <i>Mammuth americanum</i> | 200        | 2193         | Brazos river               | Waller                 | Pleistocene     | Present study      | SM                   | small proboscidean molar                          | 11.82                                                  | 8.57     |             |                                                  |                                                         |                                                      |                                                   |                                                                   |                            |                            |
| Proboscidea        | Elephantidae        | <i>Mammuth americanum</i> | 137        | 2231         | Trinity River              | Dallas                 | Pleistocene     | Present study      | SM                   | small proboscidean molar                          | 11.64                                                  | 8.67     |             |                                                  |                                                         |                                                      |                                                   |                                                                   |                            |                            |
| Proboscidea        | Elephantidae        | <i>Mammuth americanum</i> | 2271       | 2239B        | Cameron (Curry Gravel Pit) | Milam                  | Pleistocene     | Present study      | SM                   | small proboscidean molar                          | 13.1                                                   | 9.9      |             |                                                  |                                                         |                                                      |                                                   |                                                                   |                            |                            |
| Proboscidea        | Elephantidae        | <i>Mammuth americanum</i> | 43067      | 103          | Avenue site                | Travis                 | Pleistocene     | Present study      | UM2 or UM3           | molar                                             | L                                                      | 19.6     | 9.5         |                                                  |                                                         |                                                      |                                                   |                                                                   |                            |                            |
| Proboscidea        | Elephantidae        | <i>Mammuth americanum</i> | 39068      | 119          | Ingleside                  | San Patricio           | Pleistocene     | Present study      | UM5                  | third upper molar                                 | 17.4                                                   | 9.1      |             |                                                  |                                                         |                                                      |                                                   |                                                                   |                            |                            |
| Proboscidea        | Elephantidae        | <i>Mammuth americanum</i> | 39068      | 773          | Ingleside                  | San Patricio           | Pleistocene     | Present study      | UM3                  | third upper molar                                 | 16.3                                                   | 9.1      |             |                                                  |                                                         |                                                      |                                                   |                                                                   |                            |                            |
| Proboscidea        | Elephantidae        | <i>Mammuth americanum</i> | 39068      | 985          | Ingleside                  | San Patricio           | Pleistocene     | Present study      | UM3                  | third upper molar                                 | 16.7                                                   | 9.7      |             |                                                  |                                                         |                                                      |                                                   |                                                                   |                            |                            |
| <b>Proboscidea</b> | <b>Elephantidae</b> | <b><i>Mammuthus</i></b>   | <b>sp.</b> | <b>51037</b> | <b>1</b>                   | <b>Roztom</b>          | <b>Lamar</b>    | <b>Pleistocene</b> | <b>Present study</b> | <b>HuMAPC</b>                                     | <b>midshaft anteroposterior circumference of humer</b> | <b>R</b> | <b>34.3</b> | <b>4.1947</b>                                    | <b>Log(Body mass, kg) = 2.06*Log(HuMAPC, mm)+ -1.60</b> | <b>0.99</b>                                          | <b>na</b>                                         | <b>Table 1, Jukar et al. 2018</b>                                 |                            |                            |
| Proboscidea        | Elephantidae        | <i>Mammuthus</i>          | sp.        | n/a          | n/a                        | n/a                    | Pleistocene     | Present study      | HuMAPC               | midshaft anteroposterior circumference of humerus |                                                        | 37       | 4.6343      | Log(Body mass, kg) = 2.06*Log(HuMAPC, mm)+ -1.60 | 0.99                                                    | na                                                   | Table 1, Jukar et al. 2018                        |                                                                   |                            |                            |
| Proboscidea        | Elephantidae        | <i>Mammuthus</i>          | sp.        | 39061        | 5                          | Wallace Farm           | Live Oak        | Pleistocene        | Present study        | HuMAPC                                            | midshaft anteroposterior circumference of humerus      |          | 36.5        | 5.0409                                           | Log(Body mass, kg) = 2.06*Log(HuMAPC, mm)+ -1.60        | 0.99                                                 | na                                                | Table 1, Jukar et al. 2018                                        |                            |                            |
| Proboscidea        | Elephantidae        | <i>Mammuthus</i>          | sp.        | 39067        | 33                         | Ingleside              | San Patricio    | Pleistocene        | Present study        | HuEB                                              | distal end, breadth of epicondyles of humerus          | 13       | 38.5        | 5.0930                                           | Log(Body mass, kg) = 2.645*Log(HuEB, cm) + 0.2538       | 0.96                                                 | 19.0                                              | Artiodactyla; Table 16.7; Damuth and McFadden 1990                |                            |                            |
| Proboscidea        | Elephantidae        | <i>Mammuthus</i>          | sp.        | n/a          | 4003                       | n/a                    | n/a             | Pleistocene        | Present study        | HuEB                                              | distal end, breadth of epicondyles of humerus          | 18.73    | 20.3        | 5.1660                                           | Log(Body mass, kg) = 2.645*Log(HuEB, cm) + 0.2538       | 0.96                                                 | 19.0                                              | Artiodactyla; Table 16.7; Damuth and McFadden 1990                |                            |                            |
| Proboscidea        | Elephantidae        | <i>Mammuthus</i>          | sp.        | 31034        | 78                         | O'Brian Ranch          | Bee             | Pleistocene        | Present study        | HuMAPC                                            | midshaft anteroposterior circumference of humerus      | 0        | 41          | 6.0581                                           | Log(Body mass, kg) = 2.06*Log(HuMAPC, mm)+ -1.60        | 0.99                                                 | na                                                | Table 1, Jukar et al. 2018                                        |                            |                            |
| Proboscidea        | Elephantidae        | <i>Mammuthus</i>          | sp.        | 31055        | 4                          | Carille Well 2         | Stonewall       | Pleistocene        | Present study        | FeMAPC                                            | midshaft anteroposterior circumference of femur        | R        | 15          | 6.4470                                           | Log(Body mass, kg) = 2.07*Log(FeMAPC, mm) + -1.61       | 0.95                                                 | na                                                | Table 1, Jukar et al. 2018                                        |                            |                            |
| Proboscidea        | Elephantidae        | <i>Mammuthus</i>          | sp.        | 39067        | 1468                       | Ingleside              | San Patricio    | Pleistocene        | Present study        | HuMAPC                                            | midshaft anteroposterior circumference of humerus      | R        | 19.5        | 43.7                                             | 20.6                                                    | 16.3                                                 | Log(Body mass, kg) = 2.06*Log(HuMAPC, mm) + -1.60 | 0.99                                                              | na                         | Table 1, Jukar et al. 2018 |
| Proboscidea        | Elephantidae        | <i>Mammuthus</i>          | sp.        | 39065        | 2                          | Reagan Gravel Pit      | Live Oak        | Pleistocene        | Present study        | FeMAPC                                            | midshaft anteroposterior circumference of femur        | L        | 43.7        | 17.1746                                          | Log(Body mass, kg) = 2.07*Log(FeMAPC, mm) + -1.61       | 0.95                                                 | na                                                | Table 1, Jukar et al. 2018                                        |                            |                            |
| Proboscidea        | Elephantidae        | <i>Mammuthus</i>          | sp.        | 41863        | 1                          | Kocarek Gravel Pit     | Williamson      | Pleistocene        | Present study        | HuMAPC                                            | midshaft anteroposterior circumference of humerus      | L        | 44.6        | 7.2049                                           | Log(Body mass, kg) = 2.06*Log(HuMAPC, mm) + -1.60       | 0.99                                                 | na                                                | Table 1, Jukar et al. 2018                                        |                            |                            |
| Proboscidea        | Elephantidae        | <i>Mammuthus</i>          | sp.        | 39067        | 1486                       | Ingleside              | San Patricio    | Pleistocene        | Present study        | FeMAPC                                            | midshaft anteroposterior circumference of femur        |          | 44.6        | 7.4838                                           | Log(Body mass, kg) = 2.07*Log(FeMAPC, mm) + -1.61       | 0.95                                                 | na                                                | Table 1, Jukar et al. 2018                                        |                            |                            |
| Proboscidea        | Elephantidae        | <i>Mammuthus</i>          | sp.        | 39061        | 24                         | Wallace Farm           | Live Oak        | Pleistocene        | Present study        | HuMAPC                                            | midshaft anteroposterior circumference of humerus      | R        | 45.6        | 7.5417                                           | Log(Body mass, kg) = 2.06*Log(HuMAPC, mm) + -1.60       | 0.99                                                 | na                                                | Table 1, Jukar et al. 2018                                        |                            |                            |
| Proboscidea        | Elephantidae        | <i>Mammuthus</i>          | sp.        | 39067        | 1799                       | Ingleside              | San Patricio    | Pleistocene        | Present study        | HuMAPC                                            | midshaft anteroposterior circumference of humerus      |          | 47          | 8.0264                                           | Log(Body mass, kg) = 2.06*Log(HuMAPC, mm) + -1.60       | 0.99                                                 | na                                                | Table 1, Jukar et al. 2018                                        |                            |                            |
| Proboscidea        | Elephantidae        | <i>Mammuthus</i>          | sp.        | 937          | 5                          | Blackwater Draw        | sear Portal, TN | Pleistocene        | Lundelius 1972b      | HuL                                               | overall length of humerus                              |          | 114         | 8.1273                                           | Log(Body mass) = 2.625*Log(HuL) - 4.145                 | 0.9801                                               | 6.74                                              | Christensen 2004                                                  |                            |                            |
| Proboscidea        | Elephantidae        | <i>Mammuthus</i>          | sp.        | 31034        | 79                         | O'Brian Ranch          | Bee             | Pleistocene        | Present study        | FeMAPC                                            | midshaft anteroposterior circumference of femur        | R        | 14.34       | 39                                               | 8.2034                                                  | Log(Body mass, g) = 2.8735*Log(FeMAPC, mm) + 0.52682 | 0.98                                              | na                                                                | All mammals, Present Study |                            |
| Proboscidea        | Elephantidae        | <i>Mammuthus</i>          | sp.        | 39067        | 1204                       | Ingleside              | San Patricio    | Pleistocene        | Present study        | FeMAPC                                            | midshaft anteroposterior circumference of femur        |          | 48          | 28.5                                             | 27                                                      | 8.7130                                               | Log(Body mass, kg) = 2.07*Log(FeMAPC, mm) + -1.61 | 0.95                                                              | na                         | Table 1, Jukar et al. 2018 |
| Proboscidea        | Elephantidae        | <i>Mammuthus</i>          | sp.        | 937          | 2                          | Blackwater Draw        | sear Portal, TN | Pleistocene        | Lundelius 1972b      | FeL                                               | length of femur                                        | L        | 137         | 9.0174                                           | Log(Body mass) = 3.036*Log(FeL) - 5.568                 | 0.97025                                              | 6.15                                              | Christensen 2004                                                  |                            |                            |
| Proboscidea        | Elephantidae        | <i>Mammuthus</i>          | sp.        | 31218        | unknown                    | Farrish Ranch          | Bee3            | Pleistocene        | Present study        | HuMAPC                                            | midshaft anteroposterior circumference of humerus      |          | 51          | 9.4972                                           | Log(Body mass, kg) = 2.06*Log(HuMAPC, mm) + -1.60       | 0.99                                                 | na                                                | Table 1, Jukar et al. 2018                                        |                            |                            |
| Proboscidea        | Elephantidae        | <i>Mammuthus</i>          | sp.        | 31041        | 186                        | Salt Fork Brazos River | Stonewall       | Pleistocene        | Present study        | HuMAPC                                            | midshaft anteroposterior circumference of humerus      |          | 51.5        | 9.6960                                           | Log(Body mass, kg) = 2.06*Log(HuMAPC, mm) + -1.60       | 0.99                                                 | na                                                | Table 1, Jukar et al. 2018                                        |                            |                            |
| Proboscidea        | Elephantidae        | <i>Mammuthus</i>          | sp.        | 31107        | 36                         | Old Glory              | Stonewall       | Pleistocene        | Present study        | HuMAPC                                            | midshaft anteroposterior circumference of humerus      |          | 51.8        | 9.8066                                           | Log(Body mass, kg) = 2.06*Log(HuMAPC, mm) + -1.60       | 0.99                                                 | na                                                | Table 1, Jukar et al. 2018                                        |                            |                            |
| Proboscidea        | Elephantidae        | <i>Mammuthus</i>          | sp.        | 31022        | 8                          | Coahoma                | Howard          | Pleistocene        | Present study        | FeMAPC                                            | midshaft anteroposterior circumference of femur        | R        | 51          | 20.3                                             | 9.8780                                                  | Log(Body mass, kg) = 2.07*Log(FeMAPC, mm) + -1.61    | 0.95                                              | na                                                                | Table 1, Jukar et al. 2018 |                            |
| Proboscidea        | Elephantidae        | <i>Mammuthus</i>          | sp.        | 31022        | 7                          | Coahoma                | Howard          | Pleistocene        | Present study        | FeMAPC                                            | midshaft anteroposterior circumference of femur        | L        | 52          | 10.2852                                          | Log(Body mass, kg) = 2.07*Log(FeMAPC, mm) + -1.61       | 0.95                                                 | na                                                | Table 1, Jukar et al. 2018                                        |                            |                            |
| Proboscidea        | Elephantidae        | <i>Mammuthus</i>          | sp.        | 39027        | 45                         | Barton's Creek         | Gillette        | Pleistocene        | Present study        | HuMAPD                                            | midshaft anteroposterior diameter of humerus           | L        | 17.2        | 10.6942                                          | Log(Body mass, kg) = 2.06*Log(HuMAPD) - 1.60            | 0.99                                                 | na                                                | Table 1, Jukar et al. 2018                                        |                            |                            |
| Proboscidea        | Elephantidae        | <i>Mammuthus</i>          | sp.        | 937          | 3                          | Blackwater Draw        | sear Portal, TN | Pleistocene        | Lundelius 1972b      | LM                                                | lower molar                                            | L        | 25.4        | 10.2                                             |                                                         |                                                      |                                                   |                                                                   |                            |                            |
| Proboscidea        | Elephantidae        | <i>Mammuthus</i>          | sp.        | n/a          | n/a                        | n/a                    | n/a             | Pleistocene        | Present study        | LM                                                | lower molar                                            | R        | 25.9        | 10.2                                             |                                                         |                                                      |                                                   |                                                                   |                            |                            |
| Proboscidea        | Elephantidae        | <i>Mammuthus</i>          | sp.        | n/a          | n/a                        | n/a                    | n/a             | Pleistocene        | Present study        | LM                                                | lower molar                                            | L        | 24.5        | 10                                               |                                                         |                                                      |                                                   |                                                                   |                            |                            |
| Proboscidea        | Elephantidae        | <i>Mammuthus</i>          | sp.        | n/a          | n/a                        | n/a                    | n/a             | Pleistocene        | Present study        | LM                                                | lower molar                                            | R        | 22          | 9.7                                              |                                                         |                                                      |                                                   |                                                                   |                            |                            |
| Proboscidea        | Elephantidae        | <i>Mammuthus</i>          | sp.        | 43067        | 37                         | Avenue site            | Travis          | Pleistocene        | Lundelius 1992       | LM2 or LM3                                        | first or second lower molar                            | R        | 22          | 9.3                                              |                                                         |                                                      |                                                   | is this a different number for the same element I measured below? |                            |                            |
| Proboscidea        | Elephantidae        | <i>Mammuthus</i>          | sp.        | 40529        | 13                         | E & A Gravel Pit       | Bayor           | Pleistocene        | Present study        | LM3                                               | third molar                                            | L        | 23.2        | 9                                                |                                                         |                                                      |                                                   |                                                                   |                            |                            |
| Proboscidea        | Elephantidae        | <i>Mammuthus</i>          | sp.        | 43067        | 106                        | Avenue site            | Travis          | Pleistocene        | Present study        | LM3                                               | third molar                                            | L        | 22          | 9                                                |                                                         |                                                      |                                                   |                                                                   |                            |                            |
| Proboscidea        | Elephantidae        | <i>Mammuthus</i>          | sp.        | 870          | 2315                       | Brazos river           | Brazos          | Pleistocene        | Present study        | M                                                 | molar                                                  | L        | 10.17       | 4                                                |                                                         |                                                      |                                                   |                                                                   |                            |                            |
| Proboscidea        | Elephantidae        | <i>Mammuthus</i>          | sp.        | 31107        | 12                         | Old Glory              | Stonewall       | Pleistocene        | Present study        | M3                                                | third molar                                            | L        | 19.2        | 9.7                                              |                                                         |                                                      |                                                   |                                                                   |                            |                            |
| Proboscidea        | Elephantidae        | <i>Mammuthus</i>          | sp.        | 40545        | 17                         | Nueces river           | Nuences         | Pleistocene        | Present study        | UM                                                | upper molar                                            |          | 23          | 10.7                                             |                                                         |                                                      |                                                   |                                                                   |                            |                            |
| Proboscidea        | Elephantidae        | <i>Mammuthus</i>          | sp.        | 40545        | 20                         | Nueces river           | Nuences         | Pleistocene        | Present study        | UM3                                               | third upper molar                                      | R        | 22.5        | 10.8                                             |                                                         |                                                      |                                                   |                                                                   |                            |                            |
| Proboscidea        | Elephantidae        | <i>Mammuthus</i>          | sp.        | 39024        | 37                         | Buckner Ranch 3        | Bee             | Pleistocene        | Present study        | UM3                                               | third upper molar                                      |          | 16.8        | 8.9                                              |                                                         |                                                      |                                                   |                                                                   |                            |                            |
| Proboscidea        | Elephantidae        | <i>Mammuthus</i>          | sp.        | 47256        | 1                          | Miller Ranch           | Duval           | Pleistocene        | Present study        | LM                                                | lower molar                                            | L        | 22.3        | 8.8                                              |                                                         |                                                      |                                                   |                                                                   |                            |                            |
| Proboscidea        | Elephantidae        | <i>Mammuthus</i>          | sp.        | 31108        | 94                         | Old Glory              | Stonewall       | Pleistocene        | Present study        | LM1                                               | first molar                                            | L        | 26.5        | 9.4                                              |                                                         |                                                      |                                                   |                                                                   |                            |                            |
| Proboscidea        | Elephantidae        | <i>Mammuthus</i>          | sp.        | 39067        | 500                        | Ingleside              | San Patricio    | Pleistocene        | Present study        | LM1 or LM2                                        | lower first or second molar                            | L        | 13.2        | 7.2                                              |                                                         |                                                      |                                                   |                                                                   |                            |                            |
| Proboscidea        | Elephantidae        | <i>Mammuthus</i>          | sp.        | 39067        | 1287                       | Ingleside              | San Patricio    | Pleistocene        | Present study        | LM2                                               | second lower molar                                     | L        | 22.2        | 9.3                                              |                                                         |                                                      |                                                   |                                                                   |                            |                            |
| Proboscidea        | Elephantidae        | <i>Mammuthus</i>          | sp.        | 31108        | 83                         | Old Glory              | Stonewall       | Pleistocene        | Present study        | LM2 or LM3                                        | molar                                                  | R        | 24.2        | 9.5                                              |                                                         |                                                      |                                                   |                                                                   |                            |                            |
| Proboscidea        | Elephantidae        | <i>Mammuthus</i>          | sp.        | 31041        | 94                         | Salt Fork Brazos River | Stonewall       | Pleistocene        | Present study        | LM2 or LM3                                        | lower molar                                            | R        | 23.3        | 9.98                                             |                                                         |                                                      |                                                   |                                                                   |                            |                            |
| Proboscidea        | Elephantidae        | <i>Mammuthus</i>          | sp.        | 31041        | 170                        | Salt Fork Brazos River | Stonewall       | Pleistocene        | Present study        | LM2 or LM3                                        | lower molar                                            | R        | 23.2        | 9.96                                             |                                                         |                                                      |                                                   |                                                                   |                            |                            |
| Proboscidea        | Elephantidae        | <i>Mammuthus</i>          | sp.        | 43108        | 1                          | n/a                    | n/a             | Pleistocene        | Present study        | LM3                                               | third molar                                            | L        | 23.6        | 9.07                                             |                                                         |                                                      |                                                   |                                                                   |                            |                            |
| Proboscidea        | Elephantidae        | <i>Mammuthus</i>          | sp.        | 39067        | 227                        | Ingleside              | San Patricio    | Pleistocene        | Present study        | LM3                                               | third lower molar                                      | R        | 23.5        | 9.5                                              |                                                         |                                                      |                                                   |                                                                   |                            |                            |
| Proboscidea        | Elephantidae        | <i>Mammuthus</i>          | sp.        | 39067        | 1172                       | Ingleside              | San Patricio    | Pleistocene        | Lundelius 1972b      | LM3                                               | third lower molar                                      | R        | 27.2        | 9.1                                              |                                                         |                                                      |                                                   |                                                                   |                            |                            |
| Proboscidea        | Elephantidae        | <i>Mammuthus</i>          | sp.        | 39067        | 1201                       | Ingleside              | San Patricio    | Pleistocene        | Present study        | LM3                                               | third lower molar                                      | L        | 22.4        | 9.2                                              |                                                         |                                                      |                                                   |                                                                   |                            |                            |
| Proboscidea        | Elephantidae        | <i>Mammuthus</i>          | sp.        | 39067        | 1652                       | Ingleside              | San Patricio    | Pleistocene        | Lundelius 1972b      | LM3                                               | third lower molar                                      | L        | 27.5        | 9.4                                              |                                                         |                                                      |                                                   |                                                                   |                            |                            |
| Proboscidea        | Elephantidae        | <i>Mammuthus</i>          | sp.        | 39067        | 1729                       | Ingleside              | San Patricio    | Pleistocene        | Lundelius 1972b      | LM3                                               | third lower molar                                      | L        | 23.3        | 9.5                                              |                                                         |                                                      |                                                   |                                                                   |                            |                            |
| Proboscidea        | Elephantidae        | <i>Mammuthus</i>          | sp.        | 39067        | 181                        | Ingleside              | San Patricio    | Pleistocene        | Present study        | LP4 or LM1                                        | lower molar                                            | R        | 19.7        | 7.7                                              |                                                         |                                                      |                                                   |                                                                   |                            |                            |
| Proboscidea        | Elephantidae        | <i>Mammuthus</i>          | sp.        | 1140         | 1                          | Hondo                  | Medina          | Pleistocene        | Present study        | M                                                 | molar                                                  |          | 23.7        | 11                                               |                                                         |                                                      |                                                   |                                                                   |                            |                            |
| Proboscidea        | Elephantidae        | <i>Mammuthus</i>          | sp.        | 1140         | 3                          | Hondo                  | Medina          | Pleistocene        | Present study        | M                                                 | molar                                                  |          | 21.5        | 11.5                                             |                                                         |                                                      |                                                   |                                                                   |                            |                            |
| Proboscidea        | Elephantidae        | <i>Mammuthus</i>          | sp.        | 31135        | 41                         | Old Glory              | Stonewall       | Pleistocene        | Present study        | M                                                 | molar                                                  |          | 19.05       | 9.14                                             |                                                         |                                                      |                                                   |                                                                   |                            |                            |
| Proboscidea        | Elephantidae        | <i>Mammuthus</i>          | sp.        | 31135        | 47                         | Old Glory              | Stonewall       | Pleistocene        | Present study        | M                                                 | molar                                                  |          | 16.76       | 8.46                                             |                                                         |                                                      |                                                   |                                                                   |                            |                            |
| Proboscidea        | Elephantidae        | <i>Mammuthus</i>          | sp.        | 31041        | 69                         | Salt Fork Brazos River | Stonewall       | Pleistocene        | Present study        | M                                                 | molar                                                  |          | 17.8        | 10.6                                             |                                                         |                                                      |                                                   |                                                                   |                            |                            |
| Proboscidea        | Elephantidae        | <i>Mammuthus</i>          | sp.        | 31041        | 119                        | Salt Fork Brazos River | Stonewall       | Pleistocene        | Present study        | M                                                 | molar                                                  |          | 22.3        | 8.87                                             |                                                         |                                                      |                                                   |                                                                   |                            |                            |
| Proboscidea        | Elephantidae        | <i>Mammuthus</i>          | sp.        | 39067        | 723                        | Ingleside              | San Patricio    | Pleistocene        | Present study        | M                                                 | molar                                                  |          | 13.5        | 7.1                                              |                                                         |                                                      |                                                   |                                                                   |                            |                            |
| Proboscidea        | Elephantidae        | <i>Mammuthus</i>          | sp.        | 39067        | 11XX                       | Ingleside              | San Patricio    | Pleistocene        | Present study        | M                                                 | molar                                                  |          | 22.8        | 8.9                                              |                                                         |                                                      |                                                   |                                                                   |                            |                            |
| Proboscidea        | Elephantidae        | <i>Mammuthus</i>          | sp.        | 31107        | 29                         | Old Glory              | Stonewall       | Pleistocene        | Present study        | M1                                                | first molar                                            | R        | 19          | 9.4                                              |                                                         |                                                      |                                                   |                                                                   |                            |                            |
| Proboscidea        | Elephantidae        | <i>Mammuthus</i>          | sp.        | 39097        | 1214                       | Ingleside              | San Patricio    | Pleistocene        | Present study        | M3                                                | third molar                                            |          | 21          | 10.1                                             |                                                         |                                                      |                                                   |                                                                   |                            |                            |
| Proboscidea        | Elephantidae        | <i>Mammuthus</i>          | sp.        | 801          | 1                          | Reagan Gravel Pit      | Howard          | Pleistocene        | Present study        | UM                                                | upper molar                                            |          | 23.2        | 10.7                                             |                                                         |                                                      |                                                   |                                                                   |                            |                            |
| Proboscidea        | Elephantidae        | <i>Mammuthus</i>          | sp.        | 43068        | 1                          | Columbus South         | Colorado        | Pleistocene        | Present study        | UM                                                | upper molar                                            |          | 17.4        | 9.2                                              |                                                         |                                                      |                                                   |                                                                   |                            |                            |

**Table S3. Measurements of modern mammals**

| Order     | Family  | Genus              | Species                 | MMNH Accession | Sex | HBL (head-body length, mm) | Estimated or actual BM (body mass, g) | BM (body mass, g) | SKL (skull length, mm) | lm1 length (mm) | lm2 length (mm) | lm3 length (mm) | lp4 length (mm) | UM1 length (mm) | UM2 length (mm) | AsL (Astragalus length, mm) | AsTL (Trochlea length, mm) | CaL (calcaneum length, mm) | HuEB (breadth of epicondyles, mm) | HuAPD (midshaft anteroposterior diameter, mm) | TiL (Tibia length, mm) | FeAPD (midshaft anteroposterior diameter, mm) | FeB (breadth of epicondyles, mm) | FeHD (head diameter, mm) | FeL (femur length, mm) | UIOL (ulna olecranon process length, mm) |
|-----------|---------|--------------------|-------------------------|----------------|-----|----------------------------|---------------------------------------|-------------------|------------------------|-----------------|-----------------|-----------------|-----------------|-----------------|-----------------|-----------------------------|----------------------------|----------------------------|-----------------------------------|-----------------------------------------------|------------------------|-----------------------------------------------|----------------------------------|--------------------------|------------------------|------------------------------------------|
| Carnivora | Canidae | <i>Vulpes</i>      | <i>zerda</i>            | 16339          | u   | 590                        | 709                                   | 709               | 79.3                   | 8.7             | 5.3             | 3.0             | 6.1             | 4.5             | 3.3             | 10.2                        | 5.2                        | 17.8                       | 10.9                              | 5.2                                           | 87.4                   | 4.6                                           | 11.5                             | 6.4                      | 73.5                   | 8.0                                      |
| Carnivora | Canidae | <i>Urocyon</i>     | <i>cinereoargenteus</i> | 7990           | f   | 780                        | 1,843                                 | 1843              | 99.4                   | 11.6            | 6.5             | 3.8             | 7.8             | 7.5             | 6.6             | 14.2                        | 7.9                        | 21.7                       | 16.2                              | 6.7                                           | 98.3                   | 6.3                                           | 17.4                             | 8.9                      | 94.1                   | 10.3                                     |
| Carnivora | Canidae | <i>Vulpes</i>      | <i>vulpes</i>           | 1392           | m   | 1080                       | 3,062                                 | 3062              | 135.2                  | 16.0            | 7.2             | 2.0             | 10.9            | 7.4             | 4.9             | 19.8                        | 10.2                       | 31.9                       | 21.7                              | 8.2                                           | 151.3                  | 7.7                                           | 23.1                             | 12.2                     | 139.0                  | 14.3                                     |
| Carnivora | Canidae | <i>Urocyon</i>     | <i>cinereoargenteus</i> | 1368           | f   | 940                        | 3,856                                 | 3856              |                        | 13.5            | 7.4             | 3.8             | 7.9             | 7.4             | 5.7             | 18.1                        | 9.7                        | 29.9                       | 19.7                              | 8.5                                           | 132.0                  | 8.0                                           | 21.2                             | 11.3                     | 125.4                  | 13.1                                     |
| Carnivora | Canidae | <i>Urocyon</i>     | <i>cinereoargenteus</i> | 11694          | f   | 908                        | 4,082                                 | 4082              | 113.5                  | 12.1            | 7.2             | 2.9             | 7.4             | 6.6             | 4.9             |                             |                            |                            |                                   |                                               |                        |                                               |                                  |                          |                        |                                          |
| Carnivora | Canidae | <i>Vulpes</i>      | <i>vulpes</i>           | 4236           | m   | 1008                       | 4,337                                 | 4337              | 131.4                  | 14.9            | 7.2             | 2.9             | 10.2            | 6.3             | 4.5             | 18.6                        | 10.3                       | 29.7                       | 20.4                              | 8.3                                           | 146.5                  | 7.9                                           | 20.6                             | 12.2                     | 137.3                  | 13.9                                     |
| Carnivora | Canidae | <i>Vulpes</i>      | <i>vulpes</i>           | 1393           | f   | 1073                       | 4,423                                 | 4422.5            | 126.7                  | 13.6            | 7.4             | 2.5             | 9.4             | 6.0             | 4.6             | 17.5                        | 9.2                        | 31.1                       | 20.2                              | 8.3                                           | 142.5                  | 7.2                                           | 18.6                             | 11.6                     | 135.7                  | 14.7                                     |
| Carnivora | Canidae | <i>Urocyon</i>     | <i>cinereoargenteus</i> | 3974           | m   | 1013                       | 4,508                                 | 4508              | 118.3                  | 13.1            | 7.8             | 3.7             | 7.6             | 7.2             | 5.7             | 18.1                        | 9.1                        | 29.1                       | 20.8                              | 8.4                                           | 128.6                  | 8.6                                           | 21.9                             | 11.5                     | 125.1                  | 14.1                                     |
| Carnivora | Canidae | <i>Urocyon</i>     | <i>cinereoargenteus</i> | 4922           | m   | 949                        | 4,621                                 | 4621              | 116.5                  | 12.0            | 6.8             | 3.2             | 6.8             | 6.3             | 4.8             |                             |                            |                            |                                   |                                               |                        |                                               |                                  |                          |                        |                                          |
| Carnivora | Canidae | <i>Vulpes</i>      | <i>vulpes</i>           | 5645           | f   | 1065                       | 5,103                                 | 5103              | 130.0                  | 14.8            | 6.9             | 3.1             | 9.5             | 7.1             | 4.7             | 18.2                        | 9.9                        | 31.3                       | 18.7                              | 8.3                                           | 151.1                  | 8.0                                           | 21.0                             | 12.4                     | 137.6                  | 15.9                                     |
| Carnivora | Canidae | <i>Vulpes</i>      | <i>vulpes</i>           | 1359           | m   | 1245                       | 5,528                                 | 5528              | 134.0                  | 17.1            | 8.0             | 3.7             | 10.4            | 7.0             | 5.0             | 26.5                        | 10.5                       | 31.0                       | 21.8                              | 8.7                                           | 158.1                  | 8.6                                           | 25.8                             | 14.2                     | 141.9                  | 15.5                                     |
| Carnivora | Canidae | <i>Vulpes</i>      | <i>vulpes</i>           | 3975           | m   | 1086                       | 5,528                                 | 5528              | 139.4                  | 14.4            | 7.5             | 4.2             | 10.8            | 6.9             | 5.6             | 19.3                        | 10.5                       | 33.3                       | 21.5                              | 8.6                                           | 154.0                  | 8.2                                           | 20.8                             | 12.1                     | 140.6                  | 14.3                                     |
| Carnivora | Canidae | <i>Vulpes</i>      | <i>vulpes</i>           | 5675           | m   | 1080                       | 5,727                                 | 5727              | 137.8                  | 17.5            | 7.1             | 4.0             | 10.7            | 7.5             | 4.9             | 17.5                        | 10.4                       | 30.5                       | 20.0                              | 8.6                                           | 153.2                  | 7.9                                           | 21.1                             | 11.9                     | 137.9                  | 15.8                                     |
| Carnivora | Canidae | <i>Nyctereutes</i> | <i>procyonoides</i>     | 7994           | m   | 800                        | 5,897                                 | 5897              | 119.2                  | 12.2            | 5.9             | 2.8             | 6.8             | 6.0             | 4.2             | 20.1                        | 10.9                       | 28.4                       | 23.6                              | 11.6                                          | 109.0                  | 9.4                                           | 25.2                             | 13.9                     | 113.0                  | 13.5                                     |
| Carnivora | Canidae | <i>Vulpes</i>      | <i>vulpes</i>           | 1390           | m   | 1105                       | 5,982                                 | 5982              | 141.3                  | 16.4            | 7.5             | 3.4             | 10.8            | 7.5             | 5.0             | 19.1                        | 10.5                       | 32.7                       | 22.7                              | 8.8                                           | 160.0                  | 8.3                                           | 22.2                             | 13.4                     | 144.8                  | 16.0                                     |
| Carnivora | Canidae | <i>Vulpes</i>      | <i>vulpes</i>           | 5690           | m   | 1165                       | 6,123                                 | 6123              | 143.0                  | 15.3            | 8.1             | 2.9             | 9.4             | 7.9             | 5.3             | 19.5                        | 10.3                       | 33.5                       | 22.7                              | 9.4                                           | 160.6                  | 8.3                                           | 22.7                             | 12.4                     | 149.6                  | 16.2                                     |
| Carnivora | Canidae | <i>Canis</i>       | <i>mesomelas</i>        | 16463          | m   | 1000                       | 6,600                                 | 6600              | 141.7                  | 18.9            | 7.9             | 4.3             | 9.8             | 9.1             | 5.7             |                             |                            |                            | 25.2                              | 10.9                                          | 153.7                  | 10.0                                          | 23.6                             | 13.2                     | 142.4                  | 15.9                                     |
| Carnivora | Canidae | <i>Canis</i>       | <i>latrans</i>          | 2473           | f   | 1181                       | 10,971                                | 10971             | 170.1                  | 22.1            | 10.6            | 4.5             | 12.1            | 12.5            | 6.8             |                             |                            |                            |                                   |                                               |                        |                                               |                                  |                          |                        |                                          |
| Carnivora | Canidae | <i>Canis</i>       | <i>latrans</i>          | 7832           | f   | 1177                       | 11,141                                | 11141             | 175.1                  | 20.7            | 9.8             | 4.8             | 12.3            | 12.9            | 7.1             |                             |                            |                            |                                   |                                               |                        |                                               |                                  |                          |                        |                                          |
| Carnivora | Canidae | <i>Canis</i>       | <i>latrans</i>          | 13248          | m   | 1156                       | 11,340                                | 11340             | 168.2                  | 22.6            | 9.6             | 3.9             | 11.1            | 12.5            | 7.2             |                             |                            |                            |                                   |                                               |                        |                                               |                                  |                          |                        |                                          |
| Carnivora | Canidae | <i>Canis</i>       | <i>latrans</i>          | 13244          | m   | 1188                       | 11,793                                | 11793             | 178.7                  | 23.5            | 10.0            | 5.7             | 12.9            | 11.4            | 7.6             |                             |                            |                            |                                   |                                               |                        |                                               |                                  |                          |                        |                                          |
| Carnivora | Canidae | <i>Canis</i>       | <i>latrans</i>          | 2466           | m   |                            | 12,247                                | 12247             | 172.9                  | 21.8            | 9.1             | 4.4             | 12.9            | 12.7            | 7.4             |                             |                            |                            |                                   |                                               |                        |                                               |                                  |                          |                        |                                          |
| Carnivora | Canidae | <i>Canis</i>       | <i>latrans</i>          | 4990           | m   |                            | 13,154                                | 13154             | 169.8                  | 22.6            | 10.4            | 6.0             | 11.9            | 12.8            | 7.1             | 23.9                        | 13.7                       | 38.9                       | 28.9                              | 12.1                                          | 181.7                  | 10.8                                          | 28.9                             | 15.1                     | 172.0                  | 19.9                                     |
| Carnivora | Canidae | <i>Canis</i>       | <i>latrans</i>          | 5646           | m   | 1215                       | 13,154                                | 13154             | 179.5                  | 21.4            | 10.0            | 4.4             | 11.5            | 12.8            | 7.1             | 25.3                        | 14.0                       | 40.1                       | 31.0                              | 12.9                                          | 187.9                  | 11.8                                          | 28.8                             | 16.9                     | 179.5                  | 20.5                                     |
| Carnivora | Canidae | <i>Canis</i>       | <i>latrans</i>          | 5647           | m   | 1330                       | 13,154                                | 13154             | 181.3                  | 21.3            | 11.1            | 5.0             | 12.5            | 12.7            | 7.9             | 25.5                        | 13.4                       | 44.2                       | 29.9                              | 13.2                                          | 203.8                  | 11.6                                          | 28.3                             | 18.3                     | 190.5                  | 19.3                                     |
| Carnivora | Canidae | <i>Canis</i>       | <i>latrans</i>          | 1852           | m   | 1237                       | 17,237                                | 17237             | 184.8                  | 22.4            | 9.9             | 3.9             | 13.2            | 12.5            | 6.9             | 25.4                        | 13.2                       | 42.8                       | 32.4                              | 14.8                                          | 194.2                  | 13.3                                          | 31.5                             | 17.9                     | 183.0                  | 18.9                                     |
| Carnivora | Canidae | <i>Canis</i>       | <i>latrans</i>          | 15702          | f   | 1230                       | 17,917                                | 17917             | 176.5                  | 21.4            | 10.7            | 5.8             | 11.7            | 13.0            | 8.4             |                             |                            |                            |                                   |                                               |                        |                                               |                                  |                          |                        |                                          |
| Carnivora | Canidae | <i>Canis</i>       | <i>lupus</i>            | 1350           | m   | 1511                       | 22,680                                | 22680             | 239.8                  | 28.1            | 12.4            | 5.7             | 14.6            | 15.4            | 7.6             | 37.7                        | 20.2                       | 61.4                       | 42.2                              | 17.9                                          | 248.4                  | 16.7                                          | 42.2                             | 23.1                     | 234.4                  | 31.5                                     |
| Carnivora | Canidae | <i>Canis</i>       | <i>lupus</i>            | 10639          | m   |                            | 23,133                                | 23133             | 226.2                  | 27.1            | 11.4            | 6.1             | 12.9            | 15.1            | 7.9             |                             |                            |                            |                                   |                                               |                        |                                               |                                  |                          |                        |                                          |
| Carnivora | Canidae | <i>Canis</i>       | <i>lupus</i>            | 13252          | f   | 1676                       | 24,040                                | 24040             | 214.3                  | 25.8            | 12.0            | 5.6             | 13.5            | 15.3            | 7.9             |                             |                            |                            | 42.1                              | 20.0                                          | 251.0                  | 17.0                                          | 42.2                             | 25.1                     | 238.5                  | 30.2                                     |
| Carnivora | Canidae | <i>Canis</i>       | <i>lupus</i>            | 2835           | f   | 1581                       | 26,393                                | 26393             | 206.7                  | 24.1            | 10.2            | 6.5             | 13.1            | 13.6            | 7.1             |                             |                            |                            |                                   |                                               |                        |                                               |                                  |                          |                        |                                          |
| Carnivora | Canidae | <i>Canis</i>       | <i>lupus</i>            | 13266          | f   | 1560                       | 32,000                                | 32000             | 197.3                  | 25.3            | 10.9            | 4.8             | 12.6            | 12.9            | 8.3             | 32.4                        | 18.7                       | 58.1                       | 40.1                              | 17.6                                          | 221.9                  | 15.8                                          | 39.6                             | 24.0                     | 210.9                  | 27.9                                     |
| Carnivora | Canidae | <i>Canis</i>       | <i>lupus</i>            | 13263          | f   | 1626                       | 32,205                                | 32205             | 222.0                  | 25.4            | 12.3            | 6.0             | 15.1            | 13.3            | 9.0             |                             |                            |                            |                                   |                                               |                        |                                               |                                  |                          |                        |                                          |
| Carnivora | Canidae | <i>Canis</i>       | <i>lupus</i>            | 13262          | m   | 1575                       | 33,112                                | 33112             | 215.4                  | 30.7            | 12.5            | 7.9             | 14.5            | 14.3            | 7.6             |                             |                            |                            |                                   |                                               |                        |                                               |                                  |                          |                        |                                          |
| Carnivora | Canidae | <i>Canis</i>       | <i>lupus</i>            | 1362           | m   | 1537                       | 33,566                                | 33566             | 215.8                  | 26.0            | 12.5            | 5.3             | 14.9            | 15.3            | 8.8             | 37.4                        | 21.2                       | 59.9                       | 45.7                              | 18.3                                          | 258.0                  | 16.5                                          | 42.3                             | 25.5                     | 249.7                  | 32.3                                     |
| Carnivora | Canidae | <i>Canis</i>       | <i>lupus</i>            | 1221           | m   | 1676                       | 34,473                                | 34473             | 227.1                  | 29.8            | 11.9            | 6.3             | 15.9            | 16.0            | 8.9             | 34.0                        | 20.6                       | 61.3                       | 44.3                              | 17.3                                          | 247.8                  | 17.0                                          | 42.4                             | 26.2                     | 256.9                  | 31.7                                     |
| Carnivora | Canidae | <i>Canis</i>       | <i>lupus</i>            | 1361           | m   | 1575                       | 34,927                                | 34927             | 218.1                  | 27.4            | 10.8            | 6.9             | 15.5            | 15.3            | 6.5             | 37.5                        | 21.3                       | 61.3                       | 44.2                              | 19.1                                          | 275.5                  | 16.3                                          | 43.2                             | 24.4                     | 232.8                  | 28.0                                     |
| Carnivora | Canidae | <i>Canis</i>       | <i>lupus</i>            | 13265          | m   | 1746                       | 36,287                                | 36287             | 235.6                  | 30.4            | 12.2            | 5.8             | 16.1            | 16.7            | 8.6             |                             |                            |                            | 46.9                              | 18.7                                          | 262.2                  | 20.4                                          | 46.0                             | 28.4                     | 257.1                  | 30.3                                     |
| Carnivora | Canidae | <i>Canis</i>       | <i>lupus</i>            | 1349           | m   | 1549                       | 38,555                                | 38555             | 225.0                  | 28.6            | 12.0            | 6.9             | 15.6            | 16.4            | 8.7             | 34.0                        | 19.2                       | 61.9                       | 42.4                              | 18.7                                          | 274.5                  | ***                                           | 41.1                             | 28.9                     | 239.6                  | 31.0                                     |
| Carnivora | Canidae | <i>Canis</i>       | <i>lupus</i>            | 1872           | m   |                            | 44,452                                | 44452             | 237.1                  | 28.7            | 11.7            | 6.0             | 14.4            | 14.3            | 8.5             | 39.6                        | 22.2                       | 66.8                       | 47.9                              | 20.7                                          | 279.5                  | 20.6                                          | 47.6                             | 27.5                     | 261.2                  | 31.1                                     |
| Carnivora | Canidae | <i>Vulpes</i>      | <i>zerda</i>            | 16468          | u   |                            | 849                                   |                   | 77.7                   | 8.7             | 5.2             | 3.1             | 5.3             | 4.2             | 3.4             | 9.6                         | 5.1                        | 16.4                       | 11.2                              | 4.5                                           | 84.6                   | 4.3                                           | 11.2                             | 5.8                      | 70.6                   | 7.4                                      |
| Carnivora | Canidae | <i>Vulpes</i>      | <i>velox</i>            | 16505          | u   |                            | 1,717                                 |                   | 95.5                   | 9.5             | 5.7             | 4.2             | 6.7             | 5.4             | 4.0             |                             |                            |                            |                                   |                                               |                        |                                               |                                  |                          |                        |                                          |
| Carnivora | Canidae | <i>Urocyon</i>     | <i>cinereoargenteus</i> | 14181          | m   | 820                        | 2,242                                 |                   | 103.3                  | 12.1            | 5.9             | 3.7             | 7.1             | 6.1             | 4.2             |                             |                            |                            |                                   |                                               |                        |                                               |                                  |                          |                        |                                          |
| Carnivora | Canidae | <i>Nyctereutes</i> | <i>procyonoides</i>     | 16467          | f   | 940                        | 2,814                                 |                   | 110.4                  | 12.0            | 5.4             |                 | 6.2             | 6.9             | 3.9             |                             |                            |                            | 26.5                              | 8.7                                           | 103.3                  | 8.1                                           | 21.9                             | 13.0                     | 104.1                  | 11.8                                     |



|            |            |                   |                     |       |   |     |         |       |      |     |      |     |      |      |       |      |      |       |      |      |      |       |      |
|------------|------------|-------------------|---------------------|-------|---|-----|---------|-------|------|-----|------|-----|------|------|-------|------|------|-------|------|------|------|-------|------|
| Carnivora  | Felidae    | <i>Panthera</i>   | <i>leo</i>          | 17544 | f |     | 140,504 | 260.0 | 24.4 |     | 23.9 | 4.0 |      |      |       |      |      |       |      |      |      |       |      |
| Carnivora  | Felidae    | <i>Panthera</i>   | <i>leo</i>          | 18573 | m |     | 207,750 | 294.4 |      |     |      | 5.2 |      |      |       |      |      |       |      |      |      |       |      |
| Carnivora  | Felidae    | <i>Panthera</i>   | <i>leo</i>          | 17537 | m |     | 223,086 | 301.2 | 28.0 |     | 26.2 | 4.5 |      |      |       |      |      |       |      |      |      |       |      |
| Carnivora  | Felidae    | <i>Panthera</i>   | <i>leo</i>          | 7494  | m |     | 311,667 | 335.0 | 28.9 |     | 27.5 | 4.9 | 52.9 | 36.0 | 109.9 | 83.2 | 36.8 | 321.0 | 29.8 | 74.3 | 38.9 | 372.0 | 63.7 |
| Carnivora  | Felidae    | <i>Panthera</i>   | <i>leo</i>          | 17532 | f |     |         |       |      |     | 24.3 | 3.8 |      |      |       |      |      |       |      |      |      |       |      |
| Carnivora  | Felidae    | <i>Panthera</i>   | <i>leo</i>          | 17536 | f |     |         |       |      |     | 24.6 |     |      |      |       |      |      |       |      |      |      |       |      |
| Lagomorpha | Leporidae  | <i>Sylvilagus</i> | <i>aquaticus</i>    | 5926  | m | 321 | 442     | 442   |      | 1.9 |      |     |      |      |       |      |      |       |      |      |      |       |      |
| Lagomorpha | Leporidae  | <i>Sylvilagus</i> | <i>floridanus</i>   | 11936 | m | 356 | 705     | 705   |      | 2.7 |      |     |      |      |       |      |      |       |      |      |      |       |      |
| Lagomorpha | Leporidae  | <i>Sylvilagus</i> | <i>floridanus</i>   | 6863  | m | 353 | 781     | 781   |      | 2.2 |      |     |      |      |       |      |      |       |      |      |      |       |      |
| Lagomorpha | Leporidae  | <i>Sylvilagus</i> | <i>floridanus</i>   | 4243  | m | 410 | 959     | 959   |      | 2.9 |      |     |      |      |       |      |      |       |      |      |      |       |      |
| Lagomorpha | Leporidae  | <i>Sylvilagus</i> | <i>floridanus</i>   | 19177 | m | 390 | 1,045   | 1045  |      | 2.4 |      |     |      |      |       |      |      |       |      |      |      |       |      |
| Lagomorpha | Leporidae  | <i>Lepus</i>      | <i>americanus</i>   | 1020  | u |     | 1,077   | 1077  |      | 2.7 |      |     |      |      |       |      |      |       |      |      |      |       |      |
| Lagomorpha | Leporidae  | <i>Sylvilagus</i> | <i>floridanus</i>   | 4380  | m | 409 | 1,087   | 1087  |      | 2.5 |      |     |      |      |       |      |      |       |      |      |      |       |      |
| Lagomorpha | Leporidae  | <i>Sylvilagus</i> | <i>floridanus</i>   | 8955  | m | 430 | 1,162   | 1162  |      | 2.3 |      |     |      |      |       |      |      |       |      |      |      |       |      |
| Lagomorpha | Leporidae  | <i>Sylvilagus</i> | <i>floridanus</i>   | 3815  | m | 432 | 1,270   | 1270  |      | 2.6 |      |     |      |      |       |      |      |       |      |      |      |       |      |
| Lagomorpha | Leporidae  | <i>Sylvilagus</i> | <i>floridanus</i>   | 3670  | m | 445 | 1,276   | 1276  |      | 2.6 |      |     |      |      |       |      |      |       |      |      |      |       |      |
| Lagomorpha | Leporidae  | <i>Lepus</i>      | <i>americanus</i>   | 12760 | f | 420 | 1,288   | 1288  |      | 2.9 |      |     |      |      |       |      |      |       |      |      |      |       |      |
| Lagomorpha | Leporidae  | <i>Lepus</i>      | <i>americanus</i>   | 12765 | m | 435 | 1,294   | 1294  |      | 2.5 |      |     |      |      |       |      |      |       |      |      |      |       |      |
| Lagomorpha | Leporidae  | <i>Sylvilagus</i> | <i>floridanus</i>   | 4759  | m | 442 | 1,389   | 1389  |      | 2.6 |      |     |      |      |       |      |      |       |      |      |      |       |      |
| Lagomorpha | Leporidae  | <i>Sylvilagus</i> | <i>floridanus</i>   | 4877  | f | 478 | 1,417   | 1417  |      | 2.4 |      |     |      |      |       |      |      |       |      |      |      |       |      |
| Lagomorpha | Leporidae  | <i>Lepus</i>      | <i>americanus</i>   | 12762 | f | 445 | 1,443   | 1443  |      | 2.7 |      |     |      |      |       |      |      |       |      |      |      |       |      |
| Lagomorpha | Leporidae  | <i>Lepus</i>      | <i>americanus</i>   | 4964  | f | 443 | 1,497   | 1497  |      | 2.9 |      |     |      |      |       |      |      |       |      |      |      |       |      |
| Lagomorpha | Leporidae  | <i>Lepus</i>      | <i>americanus</i>   | 3887  | f | 420 | 1,843   | 1843  |      | 2.8 |      |     |      |      |       |      |      |       |      |      |      |       |      |
| Lagomorpha | Leporidae  | <i>Lepus</i>      | <i>americanus</i>   | 11939 | f | 391 | 1,899   | 1899  |      | 2.7 |      |     |      |      |       |      |      |       |      |      |      |       |      |
| Lagomorpha | Leporidae  | <i>Lepus</i>      | <i>americanus</i>   | 5731  | m | 428 | 1,928   | 1928  |      | 2.9 |      |     |      |      |       |      |      |       |      |      |      |       |      |
| Lagomorpha | Leporidae  | <i>Lepus</i>      | <i>americanus</i>   | 5089  | f | 435 | 2,070   | 2070  |      | 2.9 |      |     |      |      |       |      |      |       |      |      |      |       |      |
| Lagomorpha | Leporidae  | <i>Lepus</i>      | <i>americanus</i>   | 1022  | m |     | 2,098   | 2098  |      | 2.7 |      |     |      |      |       |      |      |       |      |      |      |       |      |
| Lagomorpha | Leporidae  | <i>Lepus</i>      | <i>arcticus</i>     | 4791  | f | 468 | 2,268   | 2268  |      | 3.3 |      |     |      |      |       |      |      |       |      |      |      |       |      |
| Lagomorpha | Leporidae  | <i>Lepus</i>      | <i>townsendii</i>   | 5101  | m | 604 | 2,410   | 2410  |      | 3.4 |      |     |      |      |       |      |      |       |      |      |      |       |      |
| Lagomorpha | Leporidae  | <i>Lepus</i>      | <i>californicus</i> | 4519  | f | 598 | 2,595   | 2595  |      | 3.2 |      |     |      |      |       |      |      |       |      |      |      |       |      |
| Lagomorpha | Leporidae  | <i>Lepus</i>      | <i>townsendii</i>   | 5100  | m | 612 | 2,665   | 2665  |      | 3.3 |      |     |      |      |       |      |      |       |      |      |      |       |      |
| Lagomorpha | Leporidae  | <i>Lepus</i>      | <i>townsendii</i>   | 11940 | m | 590 | 3,099   | 3099  |      | 3.5 |      |     |      |      |       |      |      |       |      |      |      |       |      |
| Lagomorpha | Leporidae  | <i>Lepus</i>      | <i>townsendii</i>   | 1346  | u | 597 | 3,402   | 3402  |      | 3.1 |      |     |      |      |       |      |      |       |      |      |      |       |      |
| Lagomorpha | Leporidae  | <i>Lepus</i>      | <i>townsendii</i>   | 3734  | m | 630 | 3,430   | 3430  |      | 3.6 |      |     |      |      |       |      |      |       |      |      |      |       |      |
| Lagomorpha | Leporidae  | <i>Lepus</i>      | <i>townsendii</i>   | 1164  | u | 635 | 3,515   | 3515  |      | 3.4 |      |     |      |      |       |      |      |       |      |      |      |       |      |
| Lagomorpha | Leporidae  | <i>Sylvilagus</i> | <i>audubonii</i>    | 4676  | m | 300 |         |       |      | 1.9 |      |     |      |      |       |      |      |       |      |      |      |       |      |
| Lagomorpha | Leporidae  | <i>Sylvilagus</i> | <i>audubonii</i>    | 4486  | m | 321 |         |       |      | 2.0 |      |     |      |      |       |      |      |       |      |      |      |       |      |
| Lagomorpha | Leporidae  | <i>Sylvilagus</i> | <i>audubonii</i>    | 4485  | m | 361 |         |       |      | 2.2 |      |     |      |      |       |      |      |       |      |      |      |       |      |
| Lagomorpha | Leporidae  | <i>Sylvilagus</i> | <i>audubonii</i>    | 4511  | f | 373 |         |       |      | 2.5 |      |     |      |      |       |      |      |       |      |      |      |       |      |
| Lagomorpha | Leporidae  | <i>Sylvilagus</i> | <i>audubonii</i>    | 4509  | m | 376 |         |       |      | 2.4 |      |     |      |      |       |      |      |       |      |      |      |       |      |
| Lagomorpha | Leporidae  | <i>Lepus</i>      | <i>californicus</i> | 4552  | u | 472 |         |       |      | 2.5 |      |     |      |      |       |      |      |       |      |      |      |       |      |
| Lagomorpha | Leporidae  | <i>Lepus</i>      | <i>californicus</i> | 4488  | m | 531 |         |       |      | 3.8 |      |     |      |      |       |      |      |       |      |      |      |       |      |
| Lagomorpha | Leporidae  | <i>Lepus</i>      | <i>californicus</i> | 4489  | m | 556 |         |       |      | 3.3 |      |     |      |      |       |      |      |       |      |      |      |       |      |
| Lagomorpha | Leporidae  | <i>Lepus</i>      | <i>californicus</i> | 4503  | m | 556 |         |       |      | 3.2 |      |     |      |      |       |      |      |       |      |      |      |       |      |
| Lagomorpha | Leporidae  | <i>Sylvilagus</i> | <i>audubonii</i>    | 12975 | m |     |         |       |      | 1.8 |      |     |      |      |       |      |      |       |      |      |      |       |      |
| Lagomorpha | Leporidae  | <i>Sylvilagus</i> | <i>audubonii</i>    | 10762 | m |     |         |       |      | 2.2 |      |     |      |      |       |      |      |       |      |      |      |       |      |
| Lagomorpha | Leporidae  | <i>Sylvilagus</i> | <i>audubonii</i>    | 9801  | m |     |         |       |      | 2.1 |      |     |      |      |       |      |      |       |      |      |      |       |      |
| Lagomorpha | Leporidae  | <i>Sylvilagus</i> | <i>audubonii</i>    | 4366  | m |     |         |       |      | 2.2 |      |     |      |      |       |      |      |       |      |      |      |       |      |
| Carnivora  | Mustelidae | <i>Mustela</i>    | <i>ivalis</i>       | 3709  | f | 173 | 21      | 21    | 26.3 | 3.5 | 0.3  | 1.5 | 0.9  |      |       |      |      |       |      |      |      |       |      |
| Carnivora  | Mustelidae | <i>Mustela</i>    | <i>ivalis</i>       | 3162  | u | 170 | 27      | 27    | 29.1 | 3.7 | 0.8  | 1.8 | 1.4  |      |       |      |      |       |      |      |      |       |      |
| Carnivora  | Mustelidae | <i>Mustela</i>    | <i>ivalis</i>       | 8051  | f | 169 | 31      | 30.6  | 26.3 | 3.3 | 0.4  | 1.1 | 1.3  |      |       |      |      |       |      |      |      |       |      |
| Carnivora  | Mustelidae | <i>Mustela</i>    | <i>ivalis</i>       | 2655  | u | 181 | 40      | 39.8  | 28.8 | 3.3 | 0.6  | 1.6 | 1.1  |      |       |      |      |       |      |      |      |       |      |
| Carnivora  | Mustelidae | <i>Mustela</i>    | <i>erminea</i>      | 18690 | f | 215 | 50      | 49.83 | 32.7 | 4.0 | 0.6  | 2.3 | 1.2  |      |       | 4.1  | 1.5  | 24.7  | 1.5  | 4.0  | 2.1  | 22.7  | 2.3  |
| Carnivora  | Mustelidae | <i>Mustela</i>    | <i>erminea</i>      | 12394 | m | 223 | 53      | 52.5  | 34.1 | 4.6 | 0.6  | 2.6 | 1.7  |      |       | 4.7  | 1.9  | 21.5  | 1.8  | 4.4  | 2.3  | 21.7  | 2.6  |









**Table S4. Allometric regressions developed on modern mammals**

\*\* All = Canidae, Felidae, Mustelidae, and Ursidae; excludes Procyonidae  
 Signif. codes: 0= '\*\*\*'; 0.001 = '\*\*'; 0.01 = '\*'; 0.05 = '.'; 0.1 or higher = '0.XXX'

| Group                                          | Y ~ X                  | Element (abbreviations follow Table S2) | Intercept | Std. Error | Slope   | Slope std error | Multiple R-square | DF  | P-value  |
|------------------------------------------------|------------------------|-----------------------------------------|-----------|------------|---------|-----------------|-------------------|-----|----------|
| Using Campione and Evans (35) data:            |                        |                                         |           |            |         |                 |                   |     |          |
| Afrotheria                                     | BM.log ~ FE_L.log      | Femur (length)                          | -2.558    | 0.3528     | 3.0604  | 0.1497          | 0.9929            | 3   | ***      |
| Xenarthra                                      | BM.log ~ FE_L.log      | Femur (length)                          | -0.1253   | 2.3411     | 1.8958  | 1.1206          | 0.4882            | 3   | ns       |
| Camponi and Evans                              | BM.log ~ FE_L.log      | Femur (length)                          | -2.17447  | 0.10392    | 2.90786 | 0.05198         | 0.9439            | 186 | ***      |
| Afrotheria                                     | BM.log ~ FE_MAPC.log   | Femur (midshaft AP circ)                | -0.5636   | 0.1618     | 2.8472  | 0.0867          | 0.9972            | 3   | ***      |
| Xenarthra                                      | BM.log ~ FE_MAPC.log   | Femur (midshaft AP circ)                | 0.5458    | 0.5967     | 2.0468  | 0.3703          | 0.9106            | 3   | marginal |
| Camponi and Evans                              | BM.log ~ FE_MAPC.log   | Femur (midshaft AP circ)                | -0.52682  | 0.03983    | 2.87355 | 0.02651         | 0.9834            | 198 | ***      |
| Afrotheria                                     | BM.log ~ HU_L.log      | Humerus (length)                        | -2.01734  | 0.05283    | 2.93193 | 0.02178         | 0.9999            | 2   | ***      |
| Xenarthra                                      | BM.log ~ HU_L.log      | Humerus (length)                        | 2.1221    | 2.1263     | 0.8392  | 1.0423          | 0.1777            | 3   | ns       |
| Camponi and Evans                              | BM.log ~ HU_L.log      | Humerus (length)                        | -1.72502  | 0.08607    | 2.79712 | 0.04474         | 0.9548            | 185 | ***      |
| Afrotheria                                     | BM.log ~ HU_MAPC.log   | Humerus (midshaft AP circ)              | 0.01625   | 0.11054    | 2.60904 | 0.06036         | 0.9984            | 3   | ***      |
| Xenarthra                                      | BM.log ~ HU_MAPC.log   | Humerus (midshaft AP circ)              | 0.5995    | 0.5133     | 2.059   | 0.3257          | 0.9302            | 3   | ***      |
| Camponi and Evans                              | BM.log ~ HU_MAPC.log   | Humerus (midshaft AP circ)              | -0.13193  | 0.03764    | 2.66975 | 0.0255          | 0.9823            | 198 | ***      |
| Using Mendoza et al. (33) data:                |                        |                                         |           |            |         |                 |                   |     |          |
| Ungulates                                      | BM.log ~ FLPL.log      | FLPL                                    | 1.57824   | 0.04058    | 2.24617 | 0.15943         | 0.5934            | 136 | ***      |
| Ungulates                                      | BM.log ~ PLML.log      | PLML                                    | 1.34127   | 0.03729    | 2.86687 | 0.14053         | 0.7537            | 136 | ***      |
| Ungulates                                      | BM.log ~ SLML.log      | SLML                                    | 1.14141   | 0.04229    | 2.83511 | 0.13171         | 0.7731            | 136 | ***      |
| Ungulates                                      | BM.log ~ TLML.log      | TLML                                    | 0.85307   | 0.05461    | 2.7975  | 0.13327         | 0.7641            | 136 | ***      |
| Ungulates                                      | BM.log ~ SUML.log      | SUML                                    | 1.12773   | 0.04652    | 2.73615 | 0.13942         | 0.739             | 136 | ***      |
| Ungulates                                      | BM.log ~ PAW.log       | PAW                                     | 0.03775   | 0.09144    | 2.8887  | 0.13931         | 0.7597            | 136 | ***      |
| Present Study with museum specimens (Table S3) |                        |                                         |           |            |         |                 |                   |     |          |
| All                                            | BM_Est.log ~ lm1_L.log | Lower M1                                | -0.5516   | 0.1579     | 3.9287  | 0.1351          | 0.8103            | 198 | ***      |
| All                                            | BM_Act.log ~ lm1_L.log | Lower M1                                | 0.05597   | 0.1327     | 3.19731 | 0.12117         | 0.8646            | 109 | ***      |
| Canidae                                        | BM_Est.log ~ lm1_L.log | Lower M1                                | 0.3534    | 0.1438     | 2.8541  | 0.1116          | 0.9263            | 52  | ***      |
| Canidae                                        | BM_Act.log ~ lm1_L.log | Lower M1                                | 0.4082    | 0.1971     | 2.8058  | 0.1519          | 0.8998            | 38  | ***      |
| Felidae                                        | BM_Est.log ~ lm1_L.log | Lower M1                                | 0.4863    | 0.1504     | 3.2889  | 0.1287          | 0.9382            | 43  | ***      |
| Felidae                                        | BM_Act.log ~ lm1_L.log | Lower M1                                | 0.5865    | 0.3113     | 3.1779  | 0.2972          | 0.8512            | 20  | ***      |
| Mustelidae                                     | BM_Est.log ~ lm1_L.log | Lower M1                                | -0.4611   | 0.1034     | 3.6275  | 0.11            | 0.9477            | 60  | ***      |
| Mustelidae                                     | BM_Act.log ~ lm1_L.log | Lower M1                                | -0.534    | 0.108      | 3.7376  | 0.1172          | 0.9558            | 47  | ***      |
| Ursidae                                        | BM_Est.log ~ lm1_L.log | Lower M1                                | 2.6699    | 0.3555     | 1.9336  | 0.2704          | 0.5802            | 37  | ***      |
| All                                            | BM_Est.log ~ lm2_L.log | Lower M2                                | 2.05507   | 0.04756    | 2.23218 | 0.0511          | 0.9258            | 153 | ***      |
| Canidae                                        | BM_Est.log ~ lm2_L.log | Lower M2                                | 0.4301    | 0.1716     | 3.7472  | 0.1786          | 0.8944            | 52  | ***      |
| Felidae                                        | BM_Est.log ~ lm2_L.log | Lower M2                                | --        | --         | --      | --              | --                | --  | --       |
| Mustelidae                                     | BM_Est.log ~ lm2_L.log | Lower M2                                | 2.19684   | 0.05656    | 1.92282 | 0.11237         | 0.8299            | 60  | ***      |
| Ursidae                                        | BM_Est.log ~ lm2_L.log | Lower M2                                | 3.1043    | 0.5029     | 1.5878  | 0.3789          | 0.3218            | 37  | ***      |
| All                                            | BM_Est.log ~ lm3_L.log | Lower M3                                | 2.58945   | 0.07729    | 2.20156 | 0.08364         | 0.8839            | 91  | ***      |
| Canidae                                        | BM_Est.log ~ lm3_L.log | Lower M3                                | 2.3139    | 0.1863     | 2.6188  | 0.2806          | 0.6306            | 51  | ***      |
| Felidae                                        | BM_Est.log ~ lm3_L.log | Lower M3                                | --        | --         | --      | --              | --                | --  | --       |
| Mustelidae                                     | BM_Est.log ~ lm3_L.log | Lower M3                                | --        | --         | --      | --              | --                | --  | --       |
| Ursidae                                        | BM_Est.log ~ lm3_L.log | Lower M3                                | 3.9347    | 0.3663     | 1.0682  | 0.3063          | 0.2474            | 37  | **       |
| All                                            | BM_Est.log ~ lp4_L.log | Lower premolar 4                        | 0.7534    | 0.1207     | 3.3988  | 0.1235          | 0.7928            | 198 | ***      |
| Canidae                                        | BM_Est.log ~ lp4_L.log | Lower premolar 4                        | 0.5544    | 0.2031     | 3.3177  | 0.1939          | 0.8491            | 52  | ***      |
| Felidae                                        | BM_Est.log ~ lp4_L.log | Lower premolar 4                        | 0.9356    | 0.1307     | 3.0129  | 0.1158          | 0.9402            | 43  | ***      |
| Mustelidae                                     | BM_Est.log ~ lp4_L.log | Lower premolar 4                        | 0.89363   | 0.06821    | 3.01753 | 0.0976          | 0.9409            | 60  | ***      |
| Ursidae                                        | BM_Est.log ~ lp4_L.log | Lower premolar 4                        | 3.5564    | 0.2015     | 1.5587  | 0.1895          | 0.6465            | 37  | ***      |
| All                                            | BM_Est.log ~ um1_L.log | Upper molar 1                           | 2.4075    | 0.1132     | 1.9327  | 0.1271          | 0.5375            | 199 | ***      |
| Canidae                                        | BM_Est.log ~ um1_L.log | Upper molar 1                           | 1.4669    | 0.1312     | 2.5447  | 0.1297          | 0.8809            | 52  | ***      |
| Felidae                                        | BM_Est.log ~ um1_L.log | Upper molar 1                           | 2.6454    | 0.143      | 3.5845  | 0.2944          | 0.7751            | 43  | ***      |
| Mustelidae                                     | BM_Est.log ~ um1_L.log | Upper molar 1                           | 1.70866   | 0.08016    | 2.02747 | 0.12024         | 0.8257            | 60  | ***      |
| Ursidae                                        | BM_Est.log ~ um1_L.log | Upper molar 1                           | 3.0836    | 0.4277     | 1.6579  | 0.3324          | 0.3957            | 38  | ***      |
| All                                            | BM_Est.log ~ um2_L.log | Upper molar 2                           | 2.38459   | 0.07316    | 1.99229 | 0.06595         | 0.9039            | 97  | ***      |
| Canidae                                        | BM_Est.log ~ um2_L.log | Upper molar 2                           | 1.2869    | 0.1807     | 3.413   | 0.2243          | 0.8165            | 52  | ***      |
| Felidae                                        | BM_Est.log ~ um2_L.log | Upper molar 2                           | --        | --         | --      | --              | --                | --  | --       |
| Mustelidae                                     | BM_Est.log ~ um2_L.log | Upper molar 2                           | 1.623     | 1.3        | 3.078   | 1.988           | 0.5452            | 2   | 0.2616   |
| Ursidae                                        | BM_Est.log ~ um2_L.log | Upper molar 2                           | 3.7099    | 0.4383     | 1.0449  | 0.3042          | 0.2322            | 39  | **       |

|            |                         |               |           |          |          |          |        |    |        |
|------------|-------------------------|---------------|-----------|----------|----------|----------|--------|----|--------|
| All        | BM_Est.log ~ cal_L.log  | Calcaneum     | 0.0242    | 0.1757   | 2.5173   | 0.1125   | 0.8668 | 77 | ***    |
| Canidae    | BM_Est.log ~ cal_L.log  | Calcaneum     | -0.5228   | 0.1657   | 2.8264   | 0.1046   | 0.9618 | 29 | ***    |
| Felidae    | BM_Est.log ~ cal_L.log  | Calcaneum     | -0.819    | 0.4099   | 2.9648   | 0.2453   | 0.8796 | 20 | ***    |
| Mustelidae | BM_Est.log ~ cal_L.log  | Calcaneum     | 0.8131    | 0.3552   | 1.9766   | 0.2692   | 0.7394 | 19 | ***    |
| Ursidae    | BM_Est.log ~ cal_L.log  | Calcaneum     | 2.4665    | 1.3765   | 1.4389   | 0.7467   | 0.5531 | 3  | 0.1496 |
| All        | BM_Est.log ~ hue_B.log  | Humerus (B)   | 0.0405    | 0.06632  | 2.68299  | 0.04707  | 0.9713 | 96 | ***    |
| Canidae    | BM_Est.log ~ hue_B.log  | Humerus (B)   | 0.1083    | 0.168    | 2.6819   | 0.1169   | 0.9427 | 32 | ***    |
| Felidae    | BM_Est.log ~ hue_B.log  | Humerus (B)   | 0.2138    | 0.1931   | 2.5861   | 0.128    | 0.9445 | 24 | ***    |
| Mustelidae | BM_Est.log ~ hue_B.log  | Humerus (B)   | 0.15426   | 0.07272  | 2.51467  | 0.06112  | 0.982  | 31 | ***    |
| Ursidae    | BM_Est.log ~ hue_B.log  | Humerus (B)   | 2.2917    | 0.8769   | 1.4737   | 0.457    | 0.7761 | 3  | .      |
| All        | BM_Est.log ~ huap_D.log | Humerus (APD) | 1.23459   | 0.04663  | 2.55841  | 0.04547  | 0.9706 | 96 | ***    |
| Canidae    | BM_Est.log ~ huap_D.log | Humerus (APD) | 1.2167    | 0.1172   | 2.5886   | 0.11     | 0.9454 | 32 | ***    |
| Felidae    | BM_Est.log ~ huap_D.log | Humerus (APD) | 1.2134    | 0.1489   | 2.5908   | 0.1324   | 0.941  | 24 | ***    |
| Mustelidae | BM_Est.log ~ huap_D.log | Humerus (APD) | 1.29252   | 0.07088  | 2.44101  | 0.09094  | 0.9588 | 31 | ***    |
| Ursidae    | BM_Est.log ~ huap_D.log | Humerus (APD) | 3.3308    | 0.5888   | 1.1796   | 0.3879   | 0.755  | 3  | .      |
| All        | BM_Est.log ~ ti_L.log   | Tibia         | -1.939    | 0.2246   | 2.7168   | 0.1063   | 0.8743 | 94 | ***    |
| Canidae    | BM_Est.log ~ ti_L.log   | Tibia         | -2.984    | 0.3322   | 3.1041   | 0.1487   | 0.9316 | 32 | ***    |
| Felidae    | BM_Est.log ~ ti_L.log   | Tibia         | -3.4902   | 0.729    | 3.4105   | 0.3279   | 0.8185 | 24 | ***    |
| Mustelidae | BM_Est.log ~ ti_L.log   | Tibia         | -2.455    | 0.3885   | 3.0755   | 0.215    | 0.8759 | 29 | ***    |
| Ursidae    | BM_Est.log ~ ti_L.log   | Tibia         | -0.947    | 0.7907   | 2.5158   | 0.328    | 0.9515 | 3  | **     |
| All        | BM_Est.log ~ fe_L.log   | Femur         | -1.83383  | 0.14476  | 2.6683   | 0.06866  | 0.9402 | 96 | ***    |
| Canidae    | BM_Est.log ~ fe_L.log   | Femur         | -2.8091   | 0.2474   | 3.0663   | 0.1122   | 0.9589 | 32 | ***    |
| Felidae    | BM_Est.log ~ fe_L.log   | Femur         | -2.9282   | 0.5666   | 3.14     | 0.2533   | 0.8649 | 24 | ***    |
| Mustelidae | BM_Est.log ~ fe_L.log   | Femur         | -2.1542   | 0.2216   | 2.9052   | 0.1224   | 0.9479 | 31 | ***    |
| Ursidae    | BM_Est.log ~ fe_L.log   | Femur         | -0.1844   | 0.6697   | 2.0973   | 0.2649   | 0.9543 | 3  | **     |
| All        | BM_Est.log ~ fe_B.log   | Femur (B)     | 0.03756   | 0.0555   | 2.75463  | 0.04045  | 0.9799 | 95 | ***    |
| Canidae    | BM_Est.log ~ fe_B.log   | Femur (B)     | -0.1083   | 0.1692   | 2.8353   | 0.1178   | 0.9476 | 32 | ***    |
| Felidae    | BM_Est.log ~ fe_B.log   | Femur (B)     | -0.005865 | 0.213572 | 2.786696 | 0.144617 | 0.9417 | 23 | ***    |
| Mustelidae | BM_Est.log ~ fe_B.log   | Femur (B)     | 0.04694   | 0.06182  | 2.76422  | 0.05518  | 0.9878 | 31 | ***    |
| Ursidae    | BM_Est.log ~ fe_B.log   | Femur (B)     | 2.1902    | 1.3889   | 1.6064   | 0.7619   | 0.5971 | 3  | 0.1255 |
| All        | BM_Est.log ~ feh_D.log  | Femur (HD)    | 0.81656   | 0.04723  | 2.68196  | 0.04186  | 0.9771 | 96 | ***    |
| Canidae    | BM_Est.log ~ feh_D.log  | Femur (HD)    | 0.85363   | 0.11903  | 2.60167  | 0.09934  | 0.9554 | 32 | ***    |
| Felidae    | BM_Est.log ~ feh_D.log  | Femur (HD)    | 0.6957    | 0.1687   | 2.8278   | 0.1393   | 0.945  | 24 | ***    |
| Mustelidae | BM_Est.log ~ feh_D.log  | Femur (HD)    | 0.80942   | 0.06015  | 2.7073   | 0.06899  | 0.9803 | 31 | ***    |
| Ursidae    | BM_Est.log ~ feh_D.log  | Femur (HD)    | 2.3317    | 1.0348   | 1.7473   | 0.6486   | 0.7075 | 3  | .      |
| All        | BM_Est.log ~ feap_D.log | Femur (APD)   | 1.2236    | 0.05086  | 2.73321  | 0.05295  | 0.9656 | 95 | ***    |
| Canidae    | BM_Est.log ~ feap_D.log | Femur (APD)   | 1.2805    | 0.1033   | 2.6122   | 0.1008   | 0.9559 | 31 | ***    |
| Felidae    | BM_Est.log ~ feap_D.log | Femur (APD)   | 0.9347    | 0.1552   | 2.9627   | 0.1442   | 0.9462 | 24 | ***    |
| Mustelidae | BM_Est.log ~ feap_D.log | Femur (APD)   | 1.18563   | 0.06399  | 2.88686  | 0.0922   | 0.9693 | 31 | ***    |
| Ursidae    | BM_Est.log ~ feap_D.log | Femur (APD)   | 2.6556    | 1.0721   | 1.8514   | 0.8056   | 0.6377 | 3  | 0.1052 |

Table S5. Raw isotope data for fossil specimens

| Order        | Family         | Genus              | Species          | Site ID | Unique ID | Diet      | Digestion | Site Name        | Age Category | Source           | Tissue   | Element       | $\delta^{13}\text{C}$ raw | $\delta^{13}\text{C}$ corrected | $\delta^{15}\text{N}$ | $\delta^{18}\text{O}$ vsmow | $\delta^{18}\text{O}$ vpd | C:N ratio |
|--------------|----------------|--------------------|------------------|---------|-----------|-----------|-----------|------------------|--------------|------------------|----------|---------------|---------------------------|---------------------------------|-----------------------|-----------------------------|---------------------------|-----------|
| Artiodactyla | Antilocapridae | <i>Antilocapra</i> | <i>americana</i> | 908     | 121       | Herbivore | Ruminant  | Kincaid Shelter  | Holocene     | Present Study    | collagen | scapula       | -19.5                     | -19.5                           | 6.1                   |                             |                           | 2.9       |
| Artiodactyla | Antilocapridae | <i>Antilocapra</i> | <i>americana</i> | 908     | 180       | Herbivore | Ruminant  | Kincaid Shelter  | Holocene     | Present Study    | collagen | cervical vert | -19.8                     | -19.8                           | 5.8                   |                             |                           | 2.8       |
| Artiodactyla | Antilocapridae | <i>Antilocapra</i> | <i>americana</i> | 908     | 335       | Herbivore | Ruminant  | Kincaid Shelter  | Holocene     | Present Study    | collagen | cervical vert | -19.9                     | -19.9                           | 6.0                   |                             |                           | 2.8       |
| Artiodactyla | Antilocapridae | <i>Antilocapra</i> | <i>americana</i> | 908     | 547       | Herbivore | Ruminant  | Kincaid Shelter  | Holocene     | Present Study    | enamel   | tooth         | -5.5                      | -14.3                           | NA                    |                             | -2.3                      | nd        |
| Artiodactyla | Antilocapridae | <i>Antilocapra</i> | <i>americana</i> | 908     | 833       | Herbivore | Ruminant  | Kincaid Shelter  | Holocene     | Present Study    | collagen | innominate    | -19.7                     | -19.7                           | 6.2                   |                             |                           | 2.8       |
| Artiodactyla | Antilocapridae | <i>Antilocapra</i> | <i>americana</i> | 908     | 835       | Herbivore | Ruminant  | Kincaid Shelter  | Holocene     | Present Study    | collagen | radius        | -19.9                     | -19.9                           | 5.5                   |                             |                           | 2.9       |
| Artiodactyla | Antilocapridae | <i>Antilocapra</i> | <i>americana</i> | 908     | 1413      | Herbivore | Ruminant  | Kincaid Shelter  | Holocene     | Present Study    | collagen | metatarsal    | -19.9                     | -19.9                           | 5.8                   |                             |                           | 2.9       |
| Artiodactyla | Antilocapridae | <i>Antilocapra</i> | <i>americana</i> | 908     | 1569      | Herbivore | Ruminant  | Kincaid Shelter  | Holocene     | Present Study    | enamel   | molar or pre  | -10.8                     | -19.6                           | NA                    | 33.4                        | 2.5                       | nd        |
| Artiodactyla | Antilocapridae | <i>Antilocapra</i> | <i>americana</i> | 908     | 1751      | Herbivore | Ruminant  | Kincaid Shelter  | Holocene     | Present Study    | enamel   | tooth         | -11.4                     | -20.2                           | NA                    | 30.9                        | 0.0                       | nd        |
| Artiodactyla | Antilocapridae | <i>Antilocapra</i> | <i>americana</i> | 908     | 1755      | Herbivore | Ruminant  | Kincaid Shelter  | Holocene     | Present Study    | enamel   | molar 3       | -10.6                     | -19.4                           | NA                    |                             | 1.4                       | nd        |
| Artiodactyla | Antilocapridae | <i>Antilocapra</i> | <i>americana</i> | 908     | 2017      | Herbivore | Ruminant  | Kincaid Shelter  | Holocene     | Present Study    | collagen | axis vertebr  | -18.9                     | -18.9                           | 6.5                   |                             |                           | 2.8       |
| Artiodactyla | Antilocapridae | <i>Antilocapra</i> | <i>americana</i> | 908     | 2182      | Herbivore | Ruminant  | Kincaid Shelter  | Pleistocene  | Present Study    | collagen | phalanx 1     | -19.1                     | -19.1                           | 6.9                   |                             |                           | 2.8       |
| Artiodactyla | Antilocapridae | <i>Antilocapra</i> | <i>americana</i> | 908     | 2209      | Herbivore | Ruminant  | Kincaid Shelter  | Holocene     | Present Study    | enamel   | molar 3       | -12.5                     | -21.3                           | NA                    |                             | 0.5                       | nd        |
| Artiodactyla | Antilocapridae | <i>Antilocapra</i> | <i>americana</i> | 908     | 2249      | Herbivore | Ruminant  | Kincaid Shelter  | Holocene     | Present Study    | collagen | thoracic vert | -19.8                     | -19.8                           | 6.1                   |                             |                           | 2.9       |
| Artiodactyla | Antilocapridae | <i>Antilocapra</i> | <i>americana</i> | 908     | 2464      | Herbivore | Ruminant  | Kincaid Shelter  | Holocene     | Present Study    | enamel   | tooth         | -10.1                     | -18.9                           | NA                    | 31.4                        | 0.6                       | nd        |
| Artiodactyla | Antilocapridae | <i>Antilocapra</i> | <i>americana</i> | 908     | 3432      | Herbivore | Ruminant  | Kincaid Shelter  | Holocene     | Present Study    | collagen | radius        | -19.3                     | -19.3                           | 6.5                   |                             |                           | 2.9       |
| Artiodactyla | Antilocapridae | <i>Antilocapra</i> | <i>americana</i> | 908     | 3439      | Herbivore | Ruminant  | Kincaid Shelter  | Holocene     | Present Study    | collagen | scapula       | -19.4                     | -19.4                           | 6.0                   |                             |                           | 2.9       |
| Artiodactyla | Antilocapridae | <i>Antilocapra</i> | <i>americana</i> | 908     | 3689      | Herbivore | Ruminant  | Kincaid Shelter  | Holocene     | Present Study    | collagen | phalanx       | -13.4                     | -13.4                           | 6.1                   |                             |                           | 2.8       |
| Artiodactyla | Antilocapridae | <i>Antilocapra</i> | <i>americana</i> | 908     | 3745      | Herbivore | Ruminant  | Kincaid Shelter  | Holocene     | Present Study    | collagen | phalanx 1     | -19.9                     | -19.9                           | 7.0                   |                             |                           | 2.8       |
| Artiodactyla | Antilocapridae | <i>Antilocapra</i> | <i>americana</i> | 908     | 3829      | Herbivore | Ruminant  | Kincaid Shelter  | Holocene     | Present Study    | collagen | tibia         | -19.0                     | -19.0                           | 7.4                   |                             |                           | 2.9       |
| Artiodactyla | Antilocapridae | <i>Antilocapra</i> | <i>americana</i> | 908     | 4199      | Herbivore | Ruminant  | Kincaid Shelter  | Holocene     | Present Study    | collagen | dentary       | -18.5                     | -18.5                           | 8.7                   |                             |                           | 2.9       |
| Artiodactyla | Antilocapridae | <i>Antilocapra</i> | <i>americana</i> | 908     | 4201      | Herbivore | Ruminant  | Kincaid Shelter  | Pleistocene  | Present Study    | collagen | dentary       | -18.7                     | -18.7                           | 6.4                   |                             |                           | 2.8       |
| Artiodactyla | Antilocapridae | <i>Antilocapra</i> | <i>americana</i> | 908     | 4202      | Herbivore | Ruminant  | Kincaid Shelter  | Holocene     | Present Study    | enamel   | molar 1       | -10.5                     | -19.3                           | NA                    | 31.6                        | 0.8                       | nd        |
| Artiodactyla | Antilocapridae | <i>Antilocapra</i> | <i>americana</i> | 40541   | 110       | Herbivore | Ruminant  | Starveut Cave    | Holocene     | Present Study    | collagen | n/a           | -18.9                     | -18.9                           | 5.8                   |                             |                           | 2.8       |
| Artiodactyla | Antilocapridae | <i>Antilocapra</i> | <i>americana</i> | 40541   | 1232      | Herbivore | Ruminant  | Starveut Cave    | Holocene     | Present Study    | collagen | n/a           | -19.1                     | -19.1                           | 5.0                   |                             |                           | 2.8       |
| Artiodactyla | Antilocapridae | <i>Antilocapra</i> | <i>americana</i> | 40541   | 1233      | Herbivore | Ruminant  | Starveut Cave    | Holocene     | Present Study    | collagen | n/a           | -19.5                     | -19.5                           | 7.9                   |                             |                           | 2.8       |
| Artiodactyla | Antilocapridae | <i>Antilocapra</i> | <i>americana</i> | 41172   | 267       | Herbivore | Ruminant  | Four Mile Ranch  | Holocene     | Present Study    | enamel   | tooth         | -9.1                      | -17.9                           | NA                    | 24.7                        | -5.9                      | nd        |
| Artiodactyla | Antilocapridae | <i>Antilocapra</i> | <i>americana</i> | 41229   | 10865     | Herbivore | Ruminant  | Hall's Cave      | Holocene     | Present Study    | collagen | n/a           | -18.6                     | -18.6                           | 8.6                   |                             |                           | 2.8       |
| Artiodactyla | Antilocapridae | <i>Antilocapra</i> | <i>americana</i> | 908     | 938       | Herbivore | Ruminant  | Kincaid Shelter  | Holocene     | Present Study    | collagen | n/a           | bdl                       | bd                              | nd                    |                             |                           | 5.1       |
| Artiodactyla | Antilocapridae | <i>Capromeryx</i>  | <i>sp.</i>       | 31141   | 63        | Herbivore | Ruminant  | Aranas River     | Pleistocene  | Present Study    | enamel   | molar         | -11.8                     | -20.7                           | NA                    | 29.6                        | -1.3                      | nd        |
| Artiodactyla | Antilocapridae | <i>Capromeryx</i>  | <i>sp.</i>       | 998     | 137       | Herbivore | Ruminant  | Scharbauer Ranch | Pleistocene  | Present Study    | collagen | metatarsal    | -27.4                     | nd                              | bdl                   |                             |                           | nd        |
| Artiodactyla | Antilocapridae | <i>Capromeryx</i>  | <i>sp.</i>       | 998     | 115       | Herbivore | Ruminant  | Scharbauer Ranch | Pleistocene  | Present Study    | collagen | tibia         | bdl                       | nd                              | bdl                   |                             |                           | nd        |
| Artiodactyla | Antilocapridae | <i>Tetrameryx</i>  | <i>sp.</i>       | 40541   | 112       | Herbivore | Ruminant  | Starveut Cave    | Pleistocene  | Present Study    | collagen | n/a           | -18.1                     | -18.1                           | 5.2                   |                             |                           | 2.8       |
| Artiodactyla | Bovidae        | <i>Bison</i>       | <i>antiquus</i>  | 892     | 2E        | Herbivore | Ruminant  | Lubbock Lake     | Pleistocene  | Present Study    | enamel   | molar         | -1.2                      | -10.0                           | NA                    |                             | -5.0                      | nd        |
| Artiodactyla | Bovidae        | <i>Bison</i>       | <i>antiquus</i>  | 30967   | 39        | Herbivore | Ruminant  | Ingleside        | Pleistocene  | Yann et al. 2016 | enamel   | premolar 4    | 0.5                       | -8.3                            | NA                    | 31.4                        | 0.5                       | nd        |
| Artiodactyla | Bovidae        | <i>Bison</i>       | <i>antiquus</i>  | 30967   | 110       | Herbivore | Ruminant  | Ingleside        | Pleistocene  | Yann et al. 2016 | enamel   | premolar 4    | 1.8                       | -7.0                            | NA                    | 31.8                        | 0.9                       | nd        |
| Artiodactyla | Bovidae        | <i>Bison</i>       | <i>antiquus</i>  | 30967   | 473       | Herbivore | Ruminant  | Ingleside        | Pleistocene  | Yann et al. 2016 | enamel   | molar 3       | -0.7                      | -9.5                            | NA                    | 29.4                        | -1.4                      | nd        |
| Artiodactyla | Bovidae        | <i>Bison</i>       | <i>antiquus</i>  | 30967   | 481       | Herbivore | Ruminant  | Ingleside        | Pleistocene  | Yann et al. 2016 | enamel   | molar 3       | 1.1                       | -7.7                            | NA                    | 30.0                        | -0.8                      | nd        |
| Artiodactyla | Bovidae        | <i>Bison</i>       | <i>antiquus</i>  | 30967   | 638       | Herbivore | Ruminant  | Ingleside        | Pleistocene  | Yann et al. 2016 | enamel   | molar 3       | -2.0                      | -10.8                           | NA                    | 30.1                        | -0.7                      | nd        |
| Artiodactyla | Bovidae        | <i>Bison</i>       | <i>antiquus</i>  | 30967   | 662       | Herbivore | Ruminant  | Ingleside        | Pleistocene  | Yann et al. 2016 | enamel   | molar         | -0.8                      | -9.6                            | NA                    | 31.8                        | 0.9                       | nd        |
| Artiodactyla | Bovidae        | <i>Bison</i>       | <i>antiquus</i>  | 30967   | 939       | Herbivore | Ruminant  | Ingleside        | Pleistocene  | Yann et al. 2016 | enamel   | premolar 4    | 0.9                       | -7.9                            | NA                    | 32.9                        | 2.0                       | nd        |
| Artiodactyla | Bovidae        | <i>Bison</i>       | <i>antiquus</i>  | 30967   | 1128      | Herbivore | Ruminant  | Ingleside        | Pleistocene  | Present Study    | enamel   | molar 2       | -2.2                      | -11.0                           | NA                    | 27.4                        | -3.4                      | nd        |
| Artiodactyla | Bovidae        | <i>Bison</i>       | <i>antiquus</i>  | 41229   | 1362      | Herbivore | Ruminant  | Hall's Cave      | Pleistocene  | Present Study    | collagen | metacarpal    | -9.3                      | -9.3                            | 10.4                  |                             |                           | 2.8       |
| Artiodactyla | Bovidae        | <i>Bison</i>       | <i>antiquus</i>  | 41229   | 10803     | Herbivore | Ruminant  | Hall's Cave      | Pleistocene  | Present Study    | collagen | sesamoid      | -12.3                     | -12.3                           | 7.0                   |                             |                           | 2.8       |
| Artiodactyla | Bovidae        | <i>Bison</i>       | <i>antiquus</i>  | 937     | 492       | Herbivore | Ruminant  | Blackwater Draw  | Pleistocene  | Present Study    | collagen | skull         | -28.2                     | nd                              | bdl                   |                             |                           | nd        |
| Artiodactyla | Bovidae        | <i>Bison</i>       | <i>antiquus</i>  | 30967   | 1230      | Herbivore | Ruminant  | Ingleside        | Pleistocene  | Present Study    | collagen | skull         | bdl                       | nd                              | bdl                   |                             |                           | nd        |
| Artiodactyla | Bovidae        | <i>Bison</i>       | <i>bison</i>     | 892     | 218       | Herbivore | Ruminant  | Lubbock Lake     | Holocene     | Present Study    | collagen | skull         | -8.1                      | -8.1                            | 7.7                   |                             |                           | 3.0       |
| Artiodactyla | Bovidae        | <i>Bison</i>       | <i>bison</i>     | 892     | 6CK-1     | Herbivore | Ruminant  | Lubbock Lake     | Holocene     | Present Study    | collagen | skull         | -8.9                      | -8.9                            | 7.6                   |                             |                           | 2.9       |
| Artiodactyla | Bovidae        | <i>Bison</i>       | <i>bison</i>     | 892     | 6CK-2     | Herbivore | Ruminant  | Lubbock Lake     | Holocene     | Present Study    | collagen | skull         | -8.3                      | -8.3                            | 7.9                   |                             |                           | 2.8       |
| Artiodactyla | Bovidae        | <i>Bison</i>       | <i>bison</i>     | 892     | 6K or 6A  | Herbivore | Ruminant  | Lubbock Lake     | Holocene     | Present Study    | collagen | skull         | -9.0                      | -9.0                            | 6.3                   |                             |                           | 2.8       |
| Artiodactyla | Bovidae        | <i>Bison</i>       | <i>bison</i>     | 908     | 248       | Herbivore | Ruminant  | Kincaid Shelter  | Holocene     | Present Study    | collagen | tibia         | -11.3                     | -11.3                           | 6.1                   |                             |                           | 3.0       |
| Artiodactyla | Bovidae        | <i>Bison</i>       | <i>bison</i>     | 908     | 250       | Herbivore | Ruminant  | Kincaid Shelter  | Holocene     | Present Study    | collagen | astragalus    | -11.8                     | -11.8                           | 6.9                   |                             |                           | 2.8       |
| Artiodactyla | Bovidae        | <i>Bison</i>       | <i>bison</i>     | 908     | 259       | Herbivore | Ruminant  | Kincaid Shelter  | Holocene     | Present Study    | collagen | lumbar verte  | -10.0                     | -10.0                           | 5.5                   |                             |                           | 2.9       |
| Artiodactyla | Bovidae        | <i>Bison</i>       | <i>bison</i>     | 908     | 343       | Herbivore | Ruminant  | Kincaid Shelter  | Holocene     | Present Study    | collagen | rib           | -10.8                     | -10.8                           | 5.4                   |                             |                           | 3.0       |
| Artiodactyla | Bovidae        | <i>Bison</i>       | <i>bison</i>     | 908     | 565       | Herbivore | Ruminant  | Kincaid Shelter  | Holocene     | Present Study    | collagen | tibia         | -9.6                      | -9.6                            | 6.6                   |                             |                           | 2.9       |
| Artiodactyla | Bovidae        | <i>Bison</i>       | <i>bison</i>     | 908     | 571       | Herbivore | Ruminant  | Kincaid Shelter  | Holocene     | Present Study    | collagen | sesamoid      | -13.0                     | -13.0                           | 6.3                   |                             |                           | 2.9       |
| Artiodactyla | Bovidae        | <i>Bison</i>       | <i>bison</i>     | 908     | 816       | Herbivore | Ruminant  | Kincaid Shelter  | Holocene     | Present Study    | collagen | una           | -9.3                      | -9.3                            | 5.1                   |                             |                           | 2.9       |
| Artiodactyla | Bovidae        | <i>Bison</i>       | <i>bison</i>     | 908     | 829       | Herbivore | Ruminant  | Kincaid Shelter  | Holocene     | Present Study    | collagen | femur         | -10.9                     | -10.9                           | 5.7                   |                             |                           | 2.8       |
| Artiodactyla | Bovidae        | <i>Bison</i>       | <i>bison</i>     | 908     | 831       | Herbivore | Ruminant  | Kincaid Shelter  | Holocene     | Present Study    | collagen | tibia         | -10.8                     | -10.8                           | 5.3                   |                             |                           | 2.9       |
| Artiodactyla | Bovidae        | <i>Bison</i>       | <i>bison</i>     | 908     | 832       | Herbivore | Ruminant  | Kincaid Shelter  | Holocene     | Present Study    | collagen | lumbar verte  | -9.7                      | -9.7                            | 5.7                   |                             |                           | 3.1       |
| Artiodactyla | Bovidae        | <i>Bison</i>       | <i>bison</i>     | 908     | 834       | Herbivore | Ruminant  | Kincaid Shelter  | Holocene     | Present Study    | collagen | ilium         | -9.6                      | -9.6                            | 5.3                   |                             |                           | 3.0       |
| Artiodactyla | Bovidae        | <i>Bison</i>       | <i>bison</i>     | 908     | 1089      | Herbivore | Ruminant  | Kincaid Shelter  | Holocene     | Present Study    | collagen | radius        | -9.2                      | -9.2                            | 5.6                   |                             |                           | 2.8       |
| Artiodactyla | Bovidae        | <i>Bison</i>       | <i>bison</i>     | 908     | 1937      | Herbivore | Ruminant  | Kincaid Shelter  | Holocene     | Present Study    | collagen | petrosal      | -10.0                     | -10.0                           | 5.3                   |                             |                           | 2.9       |
| Artiodactyla | Bovidae        | <i>Bison</i>       | <i>bison</i>     | 908     | 2003      | Herbivore | Ruminant  | Kincaid Shelter  | Holocene     | Present Study    | collagen | phalanx 1     | -11.3                     | -11.3                           | 6.4                   |                             |                           | 2.9       |
| Artiodactyla | Bovidae        | <i>Bison</i>       | <i>bison</i>     | 908     | 2139      | Herbivore | Ruminant  | Kincaid Shelter  | Holocene     | Present Study    | collagen | radius        | -11.9                     | -11.9                           | 6.5                   |                             |                           | 3.0       |
| Artiodactyla | Bovidae        | <i>Bison</i>       | <i>bison</i>     | 908     | 2140      | Herbivore | Ruminant  | Kincaid Shelter  | Holocene     | Present Study    | collagen | humerus       | -11.5                     | -11.5                           | 6.4                   |                             |                           | 2.9       |
| Artiodactyla | Bovidae        | <i>Bison</i>       | <i>bison</i>     | 908     | 2142      | Herbivore | Ruminant  | Kincaid Shelter  | Holocene     | Present Study    | collagen | phalanx       | -12.3                     | -12.3                           | 6.0                   |                             |                           | 2.9       |
| Artiodactyla | Bovidae        | <i>Bison</i>       | <i>bison</i>     | 908     | 2230      | Herbivore | Ruminant  | Kincaid Shelter  | Holocene     | Present Study    | enamel   | tooth         | -1.6                      | -10.4                           | NA                    | 30.2                        | -0.6                      | nd        |
| Artiodactyla | Bovidae        | <i>Bison</i>       | <i>bison</i>     | 908     | 2301      | Herbivore | Ruminant  | Kincaid Shelter  | Holocene     | Present Study    | enamel   | tooth         | -4.4                      | -13.2                           | NA                    | 30.4                        | -0.4                      | nd        |
| Artiodactyla | Bovidae        | <i>Bison</i>       | <i>bison</i>     | 908     | 2386      | Herbivore | Ruminant  | Kincaid Shelter  | Holocene     | Present Study    | enamel   | tooth         | -3.2                      | -12.0                           | NA                    | 28.5                        | -2.2                      | nd        |
| Artiodactyla | Bovidae        | <i>Bison</i>       | <i>bison</i>     | 908     | 2396      | Herbivore | Ruminant  | Kincaid Shelter  | Holocene     | Present Study    | enamel   | incisor       | 0.3                       | -8.6                            | NA                    | 29.3                        | -1.5                      | nd        |
| Artiodactyla | Bovidae        | <i>Bison</i>       | <i>bison</i>     | 908     | 3364      | Herbivore | Ruminant  | Kincaid Shelter  | Holocene     | Present Study    | collagen | tibia         | -10.0                     | -10.0                           | 5.5                   |                             |                           | 2.8       |
| Artiodactyla | Bovidae        | <i>Bison</i>       | <i>bison</i>     | 908     | 3438      | Herbivore | Ruminant  | Kincaid Shelter  | Holocene     | Present Study    | collagen | scapula       | -9.9                      | -9.9                            | 6.7                   |                             |                           | 3.0       |
| Artiodactyla | Bovidae        | <i>Bison</i>       | <i>bison</i>     | 908     | 3474      | Herbivore | Ruminant  | Kincaid Shelter  | Holocene     | Present Study    | collagen | thoracic vert | -11.2                     | -11.2                           | 7.2                   |                             |                           | 3.0       |
| Artiodactyla | Bovidae        | <i>Bison</i>       | <i>bison</i>     | 908     | 3841      | Herbivore | Ruminant  | Kincaid Shelter  | Holocene     | Present Study    | collagen | tibia         | -8.5                      | -8.5                            | 5.8                   |                             |                           | 2.9       |
| Artiodactyla | Bovidae        | <i>Bison</i>       | <i>bison</i>     | 908     | 3850      | Herbivore | Ruminant  | Kincaid Shelter  | Holocene     | Present Study    | collagen | humerus       | -11.9                     | -11.9                           | 6.2                   |                             |                           | 2.8       |
| Artiodactyla | Bovidae        | <i>Bison</i>       | <i>bison</i>     | 908     | 4352      | Herbivore | Ruminant  | Kincaid Shelter  | Holocene     | Present Study    | enamel   | tooth         | -4.8                      | -13.6                           | NA                    |                             | 2.0                       | nd        |
| Artiodactyla | Bovidae        |                    |                  |         |           |           |           |                  |              |                  |          |               |                           |                                 |                       |                             |                           |           |

|              |           |                 |                       |       |       |           |          |                   |             |               |          |               |       |       |      |      |      |      |
|--------------|-----------|-----------------|-----------------------|-------|-------|-----------|----------|-------------------|-------------|---------------|----------|---------------|-------|-------|------|------|------|------|
| Artiodactyla | Bovidae   | <i>Bison</i>    | <i>bison</i>          | 45817 | 1     | Herbivore | Ruminant | 77 Ranch          | Holocene    | Present Study | collagen | skull         | -12.8 | -12.8 | 6.0  |      |      | 3.0  |
| Artiodactyla | Bovidae   | <i>Bison</i>    | <i>bison</i>          | BDM   | 9816  | Herbivore | Ruminant | Blackwater Draw   | Holocene    | Koch 2004     | enamel   | tooth         | -1.3  | -10.1 | NA   | 26.4 | -4.3 | nd   |
| Artiodactyla | Bovidae   | <i>Bison</i>    | <i>bison</i>          | BDM   | 814A  | Herbivore | Ruminant | Blackwater Draw   | Holocene    | Koch 2004     | enamel   | tooth         | 0.8   | -8.0  | NA   | 24.8 | -5.9 | nd   |
| Artiodactyla | Bovidae   | <i>Bison</i>    | <i>bison</i>          | BDM   | na    | Herbivore | Ruminant | Blackwater Draw   | Holocene    | Koch 2004     | enamel   | molar         | -1.9  | -10.7 | NA   | 20.8 | -9.8 | nd   |
| Artiodactyla | Bovidae   | <i>Bison</i>    | <i>bison</i>          | BDM   | na    | Herbivore | Ruminant | Blackwater Draw   | Holocene    | Koch 2004     | enamel   | molar         | -0.8  | -9.6  | NA   | 28.1 | -2.7 | nd   |
| Artiodactyla | Bovidae   | <i>Bison</i>    | <i>bison</i>          | BDM   | na    | Herbivore | Ruminant | Blackwater Draw   | Holocene    | Koch 2004     | enamel   | molar         | 0.3   | -8.5  | NA   | 26.8 | -3.9 | nd   |
| Artiodactyla | Bovidae   | <i>Bison</i>    | <i>bison</i>          | BDM   | na    | Herbivore | Ruminant | Blackwater Draw   | Holocene    | Koch 2004     | enamel   | tooth         | 0.9   | -7.9  | NA   | 25.6 | -5.1 | nd   |
| Artiodactyla | Bovidae   | <i>Bison</i>    | <i>bison</i>          | BDM   | na    | Herbivore | Ruminant | Blackwater Draw   | Holocene    | Koch 2004     | enamel   | tooth         | 1.8   | -7.0  | NA   | 27.3 | -3.5 | nd   |
| Artiodactyla | Bovidae   | <i>Bison</i>    | <i>bison</i>          | MSU   | 7324  | Herbivore | Ruminant | Schulze Cave      | Holocene    | Koch 2004     | enamel   | premolar      | -1.9  | -10.7 | NA   | 25.9 | -4.8 | nd   |
| Artiodactyla | Bovidae   | <i>Bison</i>    | <i>bison</i>          | SMP   | 61893 | Herbivore | Ruminant | Keller Springs    | Holocene    | Koch 2004     | enamel   | molar 3       | 0.2   | -8.7  | NA   | 26.7 | -4.0 | nd   |
| Artiodactyla | Bovidae   | <i>Bison</i>    | <i>bison</i>          | 892   | misc  | Herbivore | Ruminant | Lubbock Lake      | Holocene    | Present Study | collagen | dentary       | bdI   | nd    | bdI  |      |      | nd   |
| Artiodactyla | Bovidae   | <i>Bison</i>    | <i>latifrons (cf)</i> | 933   | 3390  | Herbivore | Ruminant | Friesenhahn Cave  | Pleistocene | Koch 2004     | enamel   | molar 3       | 0.3   | -8.5  | NA   | 29.0 | -1.8 | nd   |
| Artiodactyla | Bovidae   | <i>Bison</i>    | <i>latifrons (cf)</i> | 1273  | 1     | Herbivore | Ruminant | na                | Pleistocene | Present Study | collagen | skull         | -27.0 | nd    | 1.0  |      |      | 9.0  |
| Artiodactyla | Bovidae   | <i>Bison</i>    | <i>sp.</i>            | 933   | 2198  | Herbivore | Ruminant | Friesenhahn Cave  | Pleistocene | Koch 2004     | enamel   | molar         | -2.1  | -10.9 | NA   | 31.0 | 0.1  | nd   |
| Artiodactyla | Bovidae   | <i>Bison</i>    | <i>sp.</i>            | 933   | 3002  | Herbivore | Ruminant | Friesenhahn Cave  | Pleistocene | Koch 2004     | enamel   | molar 3       | -1.1  | -9.9  | NA   | 29.4 | -1.4 | nd   |
| Artiodactyla | Bovidae   | <i>Bison</i>    | <i>sp.</i>            | 933   | 3285  | Herbivore | Ruminant | Friesenhahn Cave  | Pleistocene | Koch 2004     | enamel   | molar 2       | -2.8  | -11.6 | NA   | 28.5 | -2.3 | nd   |
| Artiodactyla | Bovidae   | <i>Bison</i>    | <i>sp.</i>            | 933   | 3525  | Herbivore | Ruminant | Friesenhahn Cave  | Pleistocene | Koch 2004     | enamel   | molar 1 or 2  | -2.0  | -10.8 | NA   | 29.1 | -1.7 | nd   |
| Artiodactyla | Bovidae   | <i>Bison</i>    | <i>sp.</i>            | 937   | 907   | Herbivore | Ruminant | Blackwater Draw   | Pleistocene | Koch 2004     | enamel   | molar 2       | 1.4   | -7.4  | NA   | 28.1 | -2.6 | nd   |
| Artiodactyla | Bovidae   | <i>Bison</i>    | <i>sp.</i>            | 1018  | 13    | Herbivore | Ruminant | Sitter Ranch      | Pleistocene | Present Study | collagen | n/a           | -9.2  | -9.2  | 6.1  |      |      | 2.9  |
| Artiodactyla | Bovidae   | <i>Bison</i>    | <i>sp.</i>            | 1018  | 70    | Herbivore | Ruminant | Sitter Ranch      | Pleistocene | Present Study | collagen | dentary       | -8.2  | -8.2  | 6.3  |      |      | 2.8  |
| Artiodactyla | Bovidae   | <i>Bison</i>    | <i>sp.</i>            | 1018  | 71    | Herbivore | Ruminant | Sitter Ranch      | Pleistocene | Present Study | collagen | dentary       | -10.1 | -10.1 | 6.3  |      |      | 3.1  |
| Artiodactyla | Bovidae   | <i>Bison</i>    | <i>sp.</i>            | 1018  | 72    | Herbivore | Ruminant | Sitter Ranch      | Pleistocene | Present Study | collagen | dentary       | -9.7  | -9.7  | 6.9  |      |      | 3.0  |
| Artiodactyla | Bovidae   | <i>Bison</i>    | <i>sp.</i>            | 1018  | 75    | Herbivore | Ruminant | Sitter Ranch      | Pleistocene | Present Study | collagen | dentary       | -8.3  | -8.3  | 7.5  |      |      | 2.9  |
| Artiodactyla | Bovidae   | <i>Bison</i>    | <i>sp.</i>            | 30907 | 13    | Herbivore | Ruminant | Leo.Boatright.Pit | Pleistocene | Koch 2004     | enamel   | molar 1 or 2  | -1.9  | -10.7 | NA   | 28.7 | -2.1 | nd   |
| Artiodactyla | Bovidae   | <i>Bison</i>    | <i>sp.</i>            | 30907 | 33    | Herbivore | Ruminant | Leo.Boatright.Pit | Pleistocene | Koch 2004     | enamel   | molar 1 or 2  | -0.5  | -9.3  | NA   | 29.5 | -1.3 | nd   |
| Artiodactyla | Bovidae   | <i>Bison</i>    | <i>sp.</i>            | 30967 | 694   | Herbivore | Ruminant | Ingleside         | Pleistocene | Koch 2004     | enamel   | molar 3       | -0.7  | -9.5  | NA   | 29.9 | -0.9 | nd   |
| Artiodactyla | Bovidae   | <i>Bison</i>    | <i>sp.</i>            | 30967 | 930   | Herbivore | Ruminant | Ingleside         | Pleistocene | Koch 2004     | enamel   | tooth         | 0.4   | -8.4  | NA   | 31.9 | 1.0  | nd   |
| Artiodactyla | Bovidae   | <i>Bison</i>    | <i>sp.</i>            | 30967 | 1638  | Herbivore | Ruminant | Ingleside         | Pleistocene | Koch 2004     | enamel   | molar 3       | -2.0  | -10.8 | NA   | 30.1 | -0.7 | nd   |
| Artiodactyla | Bovidae   | <i>Bison</i>    | <i>sp.</i>            | 30967 | 1662  | Herbivore | Ruminant | Ingleside         | Pleistocene | Koch 2004     | enamel   | molar         | -0.8  | -9.7  | NA   | 31.8 | 0.9  | nd   |
| Artiodactyla | Bovidae   | <i>Bison</i>    | <i>sp.</i>            | 30967 | 2473  | Herbivore | Ruminant | Ingleside         | Pleistocene | Koch 2004     | enamel   | molar 3       | -0.7  | -9.5  | NA   | 29.4 | -1.5 | nd   |
| Artiodactyla | Bovidae   | <i>Bison</i>    | <i>sp.</i>            | 30967 | 2481  | Herbivore | Ruminant | Ingleside         | Pleistocene | Koch 2004     | enamel   | molar 3       | 1.2   | -7.7  | NA   | 30.0 | -0.8 | nd   |
| Artiodactyla | Bovidae   | <i>Bison</i>    | <i>sp.</i>            | 31030 | 2A    | Herbivore | Ruminant | Valley Farms      | Pleistocene | Koch 2004     | enamel   | molar         | 0.0   | -8.8  | NA   | 30.3 | -0.6 | nd   |
| Artiodactyla | Bovidae   | <i>Bison</i>    | <i>sp.</i>            | 31030 | 2B    | Herbivore | Ruminant | Valley Farms      | Pleistocene | Koch 2004     | enamel   | molar         | -1.3  | -10.2 | NA   | 28.0 | -2.8 | nd   |
| Artiodactyla | Bovidae   | <i>Bison</i>    | <i>sp.</i>            | 31141 | 49    | Herbivore | Ruminant | Aransas River     | Pleistocene | Present Study | enamel   | molar 1       | -4.1  | -12.9 | NA   | 29.3 | -1.6 | nd   |
| Artiodactyla | Bovidae   | <i>Bison</i>    | <i>sp.</i>            | 31141 | 92    | Herbivore | Ruminant | Aransas River     | Pleistocene | Present Study | enamel   | molar 3       | -3.9  | -12.7 | NA   | 27.4 |      | nd   |
| Artiodactyla | Bovidae   | <i>Bison</i>    | <i>sp.</i>            | 40450 | 280   | Herbivore | Ruminant | ave Without A Nar | Pleistocene | Present Study | enamel   | tooth         | -4.1  | -13.0 | NA   | 28.9 | -1.9 | nd   |
| Artiodactyla | Bovidae   | <i>Bison</i>    | <i>sp.</i>            | 40450 | 437   | Herbivore | Ruminant | ave Without A Nar | Pleistocene | Present Study | collagen | petrosal      | -10.8 | -10.8 | 9.3  |      |      | 3.1  |
| Artiodactyla | Bovidae   | <i>Bison</i>    | <i>sp.</i>            | 40450 | 585   | Herbivore | Ruminant | ave Without A Nar | Pleistocene | Koch 2004     | enamel   | molar         | -3.8  | -12.6 | NA   | 28.0 | -2.8 | nd   |
| Artiodactyla | Bovidae   | <i>Bison</i>    | <i>sp.</i>            | 40450 | 1619  | Herbivore | Ruminant | ave Without A Nar | Pleistocene | Present Study | collagen | n/a           | -14.9 | -14.9 | 10.2 |      |      | 3.0  |
| Artiodactyla | Bovidae   | <i>Bison</i>    | <i>sp.</i>            | 40450 | 1619  | Herbivore | Ruminant | ave Without A Nar | Pleistocene | Present Study | enamel   | premolar      | -6.2  | -15.0 | NA   | 26.5 |      | nd   |
| Artiodactyla | Bovidae   | <i>Bison</i>    | <i>sp.</i>            | 40450 | 1975  | Herbivore | Ruminant | ave Without A Nar | Pleistocene | Present Study | enamel   | molar         | -2.0  | -10.8 | NA   | 29.8 | -1.0 | nd   |
| Artiodactyla | Bovidae   | <i>Bison</i>    | <i>sp.</i>            | 40450 | 1976  | Herbivore | Ruminant | ave Without A Nar | Pleistocene | Present Study | enamel   | tooth         | -5.7  | -14.5 | NA   |      |      | 0.0  |
| Artiodactyla | Bovidae   | <i>Bison</i>    | <i>sp.</i>            | 40450 | 2552  | Herbivore | Ruminant | ave Without A Nar | Pleistocene | Present Study | collagen | thoracic vert | -11.4 | -11.4 | 9.6  |      |      | 3.3  |
| Artiodactyla | Bovidae   | <i>Bison</i>    | <i>sp.</i>            | 40450 | 2554  | Herbivore | Ruminant | ave Without A Nar | Pleistocene | Present Study | collagen | calcaneus     | -9.9  | -9.9  | 9.1  |      |      | 3.0  |
| Artiodactyla | Bovidae   | <i>Bison</i>    | <i>sp.</i>            | 40450 | 2560  | Herbivore | Ruminant | ave Without A Nar | Pleistocene | Present Study | collagen | lumbar verte  | -14.1 | -14.1 | 8.9  |      |      | 3.0  |
| Artiodactyla | Bovidae   | <i>Bison</i>    | <i>sp.</i>            | 40450 | 2571  | Herbivore | Ruminant | ave Without A Nar | Pleistocene | Present Study | enamel   | molar         | -2.6  | -11.4 | NA   |      |      | -5.9 |
| Artiodactyla | Bovidae   | <i>Bison</i>    | <i>sp.</i>            | 41229 | 7198  | Herbivore | Ruminant | Hall's Cave       | Pleistocene | Present Study | collagen | dentary       | -14.8 | -14.8 | 11.6 |      |      | 3.0  |
| Artiodactyla | Bovidae   | <i>Bison</i>    | <i>sp.</i>            | 41229 | 10809 | Herbivore | Ruminant | Hall's Cave       | Pleistocene | Present Study | collagen | phalanx       | -8.3  | -8.3  | 9.7  |      |      | 2.8  |
| Artiodactyla | Bovidae   | <i>Bison</i>    | <i>sp.</i>            | 41229 | 11925 | Herbivore | Ruminant | Hall's Cave       | Pleistocene | Present Study | collagen | premolar 4 r  | -11.2 | -11.2 | 8.2  |      |      | 2.8  |
| Artiodactyla | Bovidae   | <i>Bison</i>    | <i>sp.</i>            | 41229 | 19786 | Herbivore | Ruminant | Hall's Cave       | Pleistocene | Present Study | collagen | phalanx       | -12.0 | -12.0 | 7.4  |      |      | 2.8  |
| Artiodactyla | Bovidae   | <i>Bison</i>    | <i>sp.</i>            | 41229 | 19787 | Herbivore | Ruminant | Hall's Cave       | Pleistocene | Present Study | collagen | phalanx       | -12.3 | -12.3 | 7.2  |      |      | 2.8  |
| Artiodactyla | Bovidae   | <i>Bison</i>    | <i>sp.</i>            | 41229 | uncat | Herbivore | Ruminant | Hall's Cave       | Pleistocene | Present Study | collagen | bone          | -11.3 | -11.3 | 7.2  |      |      | 2.8  |
| Artiodactyla | Bovidae   | <i>Bison</i>    | <i>sp.</i>            | BDM   | 9789  | Herbivore | Ruminant | Blackwater Draw   | Pleistocene | Koch 2004     | enamel   | tooth         | 1.1   | -7.7  | NA   | 25.2 | -5.5 | nd   |
| Artiodactyla | Bovidae   | <i>Bison</i>    | <i>sp.</i>            | BDM   | na    | Herbivore | Ruminant | Blackwater Draw   | Pleistocene | Koch 2004     | enamel   | tooth         | -1.3  | -10.1 | NA   | 28.0 | -2.8 | nd   |
| Artiodactyla | Bovidae   | <i>Bison</i>    | <i>sp.</i>            | BDM   | na    | Herbivore | Ruminant | Blackwater Draw   | Pleistocene | Koch 2004     | enamel   | tooth         | 0.4   | -8.4  | NA   | 26.2 | -4.5 | nd   |
| Artiodactyla | Bovidae   | <i>Bison</i>    | <i>sp.</i>            | BDM   | na    | Herbivore | Ruminant | Blackwater Draw   | Pleistocene | Koch 2004     | enamel   | tooth         | 0.9   | -7.9  | NA   | 29.7 | -1.1 | nd   |
| Artiodactyla | Bovidae   | <i>Bison</i>    | <i>sp.</i>            | MSU   | 2825  | Herbivore | Ruminant | Howard Ranch      | Pleistocene | Koch 2004     | enamel   | premolar      | 2.8   | -6.0  | NA   | 30.8 | 0.0  | nd   |
| Artiodactyla | Bovidae   | <i>Bison</i>    | <i>sp.</i>            | SMP   | 60178 | Herbivore | Ruminant | Moore.Pit         | Pleistocene | Koch 2004     | enamel   | cheek tooth   | -2.1  | -10.9 | NA   | 27.9 | -2.8 | nd   |
| Artiodactyla | Bovidae   | <i>Bison</i>    | <i>sp.</i>            | SMP   | 60608 | Herbivore | Ruminant | Moore.Pit         | Pleistocene | Koch 2004     | enamel   | molar         | -3.4  | -12.2 | NA   | 26.2 | -4.5 | nd   |
| Artiodactyla | Bovidae   | <i>Bison</i>    | <i>sp.</i>            | SMP   | 60849 | Herbivore | Ruminant | Moore.Pit         | Pleistocene | Koch 2004     | enamel   | premolar      | -1.3  | -10.1 | NA   | 28.4 | -2.4 | nd   |
| Artiodactyla | Bovidae   | <i>Bison</i>    | <i>sp.</i>            | 892   | 270   | Herbivore | Ruminant | Lubbock Lake      | Pleistocene | Present Study | collagen | skull         | -28.0 | nd    | bdI  |      |      | nd   |
| Artiodactyla | Bovidae   | <i>Bison</i>    | <i>sp.</i>            | 937   | 589   | Herbivore | Ruminant | Blackwater Draw   | Pleistocene | Present Study | collagen | n/a           | -27.8 | nd    | bdI  |      |      | nd   |
| Artiodactyla | Bovidae   | <i>Bison</i>    | <i>sp.</i>            | 892   | 484   | Herbivore | Ruminant | Lubbock Lake      | Pleistocene | Present Study | collagen | skull         | -27.3 | nd    | bdI  |      |      | 24.1 |
| Artiodactyla | Bovidae   | <i>Bison</i>    | <i>sp.</i>            | 30967 | 94    | Herbivore | Ruminant | Ingleside         | Pleistocene | Present Study | collagen | scapula       | -26.4 | nd    | 4.4  |      |      | 7.8  |
| Artiodactyla | Bovidae   | <i>Bison</i>    | <i>sp.</i>            | 1018  | 69    | Herbivore | Ruminant | Sitter Ranch      | Pleistocene | Present Study | collagen | dentary       | -12.3 | -12.3 | 6.5  |      |      | 3.4  |
| Artiodactyla | Bovidae   | <i>Bison</i>    | <i>sp.</i>            | 30839 | 111   | Herbivore | Ruminant | Morhiss Mound     | Pleistocene | Present Study | collagen | skull         | -11.8 | -11.8 | 9.6  |      |      | 3.1  |
| Artiodactyla | Bovidae   | <i>Bison</i>    | <i>sp.</i>            | 41229 | 12138 | Herbivore | Ruminant | Hall's Cave       | Pleistocene | Present Study | collagen | calcaneus     | -10.7 | -10.7 | 10.6 |      |      | 2.8  |
| Artiodactyla | Camelidae | <i>Camelops</i> | <i>hesternus</i>      | 933   | 1922  | Herbivore | Ruminant | Friesenhahn Cave  | Pleistocene | Present Study | enamel   | molar 3       | -7.2  | -16.0 | NA   |      |      | 0.0  |
| Artiodactyla | Camelidae | <i>Camelops</i> | <i>hesternus</i>      | 30967 | 290   | Herbivore | Ruminant | Ingleside         | Pleistocene | Present Study | enamel   | molar         | -10.9 | -19.7 | NA   | 29.5 | -1.3 | nd   |
| Artiodactyla | Camelidae | <i>Camelops</i> | <i>hesternus</i>      | 30967 | 915   | Herbivore | Ruminant | Ingleside         | Pleistocene | Present Study | enamel   | molar 2       | -12.0 | -20.8 | NA   | 29.2 | -1.6 | nd   |
| Artiodactyla | Camelidae | <i>Camelops</i> | <i>hesternus</i>      | TMM   | 2184b | Herbivore | Ruminant | Cameron           | Pleistocene | Present Study | enamel   | molar         | -9.5  | -18.3 | NA   | 30.0 | -0.8 | nd   |
| Artiodactyla | Camelidae | <i>Camelops</i> | <i>hesternus</i>      | 908   | 2391  | Herbivore | Ruminant | Kincaid Shelter   | Pleistocene | Present Study | collagen | cuboid        | -27.9 | nd    | bdI  |      |      | nd   |
| Artiodactyla | Camelidae | <i>Camelops</i> | <i>hesternus</i>      | 30967 | 1599  | Herbivore | Ruminant | Ingleside         | Pleistocene | Present Study | collagen | skull         | -27.3 | nd    | bdI  |      |      | 53.4 |
| Artiodactyla | Camelidae | <i>Camelops</i> | <i>hesternus</i>      | 30967 | 1595  | Herbivore | Ruminant | Ingleside         | Pleistocene | Present Study | collagen | n/a           | -24.9 | nd    | bdI  |      |      | 5.4  |
| Artiodactyla | Camelidae | <i>Camelops</i> | <i>hesternus</i>      | 908   | 2393  | Herbivore | Ruminant | Kincaid Shelter   | Pleistocene | Present Study | collagen | mesocuneifc   | bdI   | nd    | bdI  |      |      | nd   |
| Artiodactyla | Camelidae | <i>Camelops</i> | <i>hesternus</i>      | 177   | 2184b | Herbivore | Ruminant | Cameron           | Pleistocene | Present Study | enamel   | molar         | -1.8  | -10.6 | NA   |      |      | -3.3 |
| Artiodactyla | Camelidae | <i>Camelops</i> | <i>hesternus</i>      | 908   | 2373  | Herbivore | Ruminant | Kincaid Shelter   | Pleistocene | Present Study | enamel   | tooth         | -9.3  | -18.1 | NA   | 31.3 | 0.4  | nd   |
| Artiodactyla | Camelidae | <i>Camelops</i> | <i>hesternus</i>      | 908   | 2382  | Herbivore | Ruminant | Kincaid Shelter   | Pleistocene | Present Study | enamel   | tooth         | -7.9  | -16.7 | NA   | 29.7 | -1.1 | nd   |
| Artiodactyla | Camelidae | <i>Camelops</i> | <i>hesternus</i>      | 908   | 2407  | Herbivore | Ruminant | Kincaid Shelter   | Pleistocene | Present Study | enamel   | tooth         | -8.7  | -17.5 | NA   |      |      | -1.7 |
| Artiodactyla | Camelidae | <i>Camelops</i> | <i>hesternus&lt;/</i> |       |       |           |          |                   |             |               |          |               |       |       |      |      |      |      |

|              |           |                     |                  |       |      |           |              |                  |             |                  |          |               |       |       |     |      |      |      |
|--------------|-----------|---------------------|------------------|-------|------|-----------|--------------|------------------|-------------|------------------|----------|---------------|-------|-------|-----|------|------|------|
| Artiodactyla | Camelidae | <i>Camelops</i>     | <i>hesternus</i> | 30967 | 2237 | Herbivore | Ruminant     | Ingleside        | Pleistocene | Present Study    | enamel   | tooth         | -9.8  | -18.6 | NA  | -2.0 | nd   |      |
| Artiodactyla | Camelidae | <i>Camelops</i>     | <i>hesternus</i> | 30967 | 2238 | Herbivore | Ruminant     | Ingleside        | Pleistocene | Present Study    | enamel   | molar 1       | -11.1 | -19.9 | NA  | -3.1 | nd   |      |
| Artiodactyla | Camelidae | <i>Camelops</i>     | <i>hesternus</i> | 30967 | 2239 | Herbivore | Ruminant     | Ingleside        | Pleistocene | Present Study    | enamel   | tooth         | -9.5  | -18.3 | NA  | 28.8 | nd   |      |
| Artiodactyla | Camelidae | <i>Camelops</i>     | <i>hesternus</i> | 31141 | 50   | Herbivore | Ruminant     | Aransas River    | Pleistocene | Present Study    | enamel   | molar         | -11.4 | -20.2 | NA  | 28.4 | -2.4 | nd   |
| Artiodactyla | Camelidae | <i>Camelops</i>     | <i>hesternus</i> | 31141 | 95   | Herbivore | Ruminant     | Aransas River    | Pleistocene | Present Study    | enamel   | molar 1       | -6.4  | -15.2 | NA  |      | -3.7 | nd   |
| Artiodactyla | Camelidae | <i>Camelops</i>     | <i>hesternus</i> | 40685 | 814  | Herbivore | Ruminant     | Zesch Cave       | Pleistocene | Present Study    | enamel   | molar         | -0.2  | -9.0  | NA  | 28.7 | -2.1 | nd   |
| Artiodactyla | Camelidae | <i>Camelops</i>     | <i>hesternus</i> | 40685 | 814a | Herbivore | Ruminant     | Zesch Cave       | Pleistocene | Present Study    | enamel   | tooth         | 0.2   | -8.7  | NA  |      | -1.0 | nd   |
| Artiodactyla | Camelidae | <i>Camelops</i>     | <i>hesternus</i> | 40685 | 814b | Herbivore | Ruminant     | Zesch Cave       | Pleistocene | Present Study    | enamel   | tooth         | 0.3   | -9.1  | NA  |      | -2.5 | nd   |
| Artiodactyla | Camelidae | <i>Camelops</i>     | <i>hesternus</i> | 42263 | 1    | Herbivore | Ruminant     | na               | Pleistocene | Present Study    | enamel   | molar         | 0.3   | -8.6  | NA  |      | 0.7  | nd   |
| Artiodactyla | Camelidae | <i>Camelops</i>     | <i>hesternus</i> | ET    | 5416 | Herbivore | Ruminant     | Lake Tawakoni    | Pleistocene | Present Study    | collagen | metapodial    | bdl   | nd    | bdl |      |      |      |
| Artiodactyla | Camelidae | <i>Hemiauchenia</i> | <i>sp.</i>       | 40685 | 676  | Herbivore | Ruminant     | Zesch Cave       | Pleistocene | Present Study    | collagen | dentary       | -27.8 | nd    | bdl |      |      | 43.4 |
| Artiodactyla | Camelidae | <i>Hemiauchenia</i> | <i>sp.</i>       | 40685 | 832  | Herbivore | Ruminant     | Zesch Cave       | Pleistocene | Present Study    | collagen | maxilla       | bdl   | nd    | bdl |      |      | nd   |
| Artiodactyla | Camelidae | <i>Palaeolama</i>   | <i>mirifica</i>  | 30967 | 90   | Herbivore | Ruminant     | Ingleside        | Pleistocene | Yann et al. 2016 | enamel   | molar 3       | -11.4 | -20.2 | NA  | 31.3 | 0.4  | nd   |
| Artiodactyla | Camelidae | <i>Palaeolama</i>   | <i>mirifica</i>  | 30967 | 289  | Herbivore | Ruminant     | Ingleside        | Pleistocene | Yann et al. 2016 | enamel   | molar 3       | -12.4 | -21.2 | NA  | 31.9 | 1.0  | nd   |
| Artiodactyla | Camelidae | <i>Palaeolama</i>   | <i>mirifica</i>  | 30967 | 314  | Herbivore | Ruminant     | Ingleside        | Pleistocene | Yann et al. 2016 | enamel   | molar 3       | -10.4 | -19.2 | NA  | 31.5 | 0.6  | nd   |
| Artiodactyla | Camelidae | <i>Palaeolama</i>   | <i>mirifica</i>  | 30967 | 500  | Herbivore | Ruminant     | Ingleside        | Pleistocene | Yann et al. 2016 | enamel   | molar 1 or 2  | -10.6 | -19.4 | NA  | 29.2 | -1.6 | nd   |
| Artiodactyla | Camelidae | <i>Palaeolama</i>   | <i>mirifica</i>  | 30967 | 567  | Herbivore | Ruminant     | Ingleside        | Pleistocene | Yann et al. 2016 | enamel   | molar 3       | -11.7 | -20.5 | NA  | 30.1 | -0.7 | nd   |
| Artiodactyla | Camelidae | <i>Palaeolama</i>   | <i>mirifica</i>  | 30967 | 584  | Herbivore | Ruminant     | Ingleside        | Pleistocene | Yann et al. 2016 | enamel   | molar 3       | -12.2 | -21.0 | NA  | 32.6 | 1.7  | nd   |
| Artiodactyla | Camelidae | <i>Palaeolama</i>   | <i>mirifica</i>  | 30967 | 585  | Herbivore | Ruminant     | Ingleside        | Pleistocene | Yann et al. 2016 | enamel   | molar 3       | -10.6 | -19.4 | NA  | 31.7 | 0.8  | nd   |
| Artiodactyla | Camelidae | <i>Palaeolama</i>   | <i>mirifica</i>  | 30967 | 676  | Herbivore | Ruminant     | Ingleside        | Pleistocene | Yann et al. 2016 | enamel   | molar 3       | -12.1 | -20.9 | NA  | 31.6 | 0.7  | nd   |
| Artiodactyla | Camelidae | <i>Palaeolama</i>   | <i>mirifica</i>  | 30967 | 916  | Herbivore | Ruminant     | Ingleside        | Pleistocene | Present Study    | enamel   | molar 1       | -11.2 | -20.0 | NA  |      | 1.1  | nd   |
| Artiodactyla | Camelidae | <i>Palaeolama</i>   | <i>mirifica</i>  | 30967 | 920  | Herbivore | Ruminant     | Ingleside        | Pleistocene | Yann et al. 2016 | enamel   | molar 3       | -11.3 | -20.1 | NA  | 29.9 | -0.9 | nd   |
| Artiodactyla | Camelidae | <i>Palaeolama</i>   | <i>mirifica</i>  | 30967 | 944  | Herbivore | Ruminant     | Ingleside        | Pleistocene | Yann et al. 2016 | enamel   | molar 3       | -12.3 | -21.1 | NA  | 31.1 | 0.2  | nd   |
| Artiodactyla | Camelidae | <i>Palaeolama</i>   | <i>mirifica</i>  | 30967 | 1028 | Herbivore | Ruminant     | Ingleside        | Pleistocene | Present Study    | enamel   | molar 1       | -9.9  | -18.7 | NA  | 31.0 | 0.2  | nd   |
| Artiodactyla | Camelidae | <i>Palaeolama</i>   | <i>mirifica</i>  | 30967 | 1181 | Herbivore | Ruminant     | Ingleside        | Pleistocene | Present Study    | enamel   | molar         | -12.1 | -20.9 | NA  | 27.1 | -3.7 | nd   |
| Artiodactyla | Camelidae | <i>Palaeolama</i>   | <i>mirifica</i>  | 30967 | 1682 | Herbivore | Ruminant     | Ingleside        | Pleistocene | Present Study    | enamel   | molar 1       | -11.9 | -20.8 | NA  |      | -0.9 | nd   |
| Artiodactyla | Camelidae | <i>Palaeolama</i>   | <i>mirifica</i>  | 30967 | 2585 | Herbivore | Ruminant     | Ingleside        | Pleistocene | Present Study    | enamel   | molar 3       | -11.1 | -18.9 | NA  | 30.3 | -0.6 | nd   |
| Artiodactyla | Camelidae | <i>Palaeolama</i>   | <i>mirifica</i>  | 30967 | 874  | Herbivore | Ruminant     | Ingleside        | Pleistocene | Present Study    | collagen | skull         | -27.2 | nd    | bdl |      |      | nd   |
| Artiodactyla | Camelidae | <i>Palaeolama</i>   | <i>mirifica</i>  | 30967 | 1778 | Herbivore | Ruminant     | Ingleside        | Pleistocene | Present Study    | collagen | n/a           | bdl   | nd    | bdl |      |      | nd   |
| Artiodactyla | Cervidae  | <i>Navahocercus</i> | <i>fricki</i>    | 804   | 85   | Herbivore | Ruminant     | Montell Shelter  | Pleistocene | Present Study    | enamel   | molar 1       | -9.5  | -18.3 | NA  |      | -5.4 | nd   |
| Artiodactyla | Cervidae  | <i>Odocoileus</i>   | <i>sp.</i>       | 804   | 110  | Herbivore | Ruminant     | Montell Shelter  | Pleistocene | Present Study    | collagen | n/a           | -19.1 | -19.1 | 5.4 |      |      | 2.8  |
| Artiodactyla | Cervidae  | <i>Odocoileus</i>   | <i>sp.</i>       | 804   | 141  | Herbivore | Ruminant     | Montell Shelter  | Pleistocene | Present Study    | collagen | n/a           | -19.4 | -19.4 | 5.3 |      |      | 2.8  |
| Artiodactyla | Cervidae  | <i>Odocoileus</i>   | <i>sp.</i>       | 908   | 84   | Herbivore | Ruminant     | Kincaid Shelter  | Holocene    | Present Study    | enamel   | molar or pre  | -13.4 | -22.3 | NA  | 30.6 | -0.2 | nd   |
| Artiodactyla | Cervidae  | <i>Odocoileus</i>   | <i>sp.</i>       | 908   | 131  | Herbivore | Ruminant     | Kincaid Shelter  | Holocene    | Present Study    | collagen | n/a           | -20.7 | -20.7 | 5.3 |      |      | 2.9  |
| Artiodactyla | Cervidae  | <i>Odocoileus</i>   | <i>sp.</i>       | 908   | 263  | Herbivore | Ruminant     | Kincaid Shelter  | Holocene    | Present Study    | collagen | scapula       | -18.8 | -18.8 | 6.9 |      |      | 3.0  |
| Artiodactyla | Cervidae  | <i>Odocoileus</i>   | <i>sp.</i>       | 908   | 330  | Herbivore | Ruminant     | Kincaid Shelter  | Holocene    | Present Study    | collagen | n/a           | -17.9 | -17.9 | 7.3 |      |      | 2.9  |
| Artiodactyla | Cervidae  | <i>Odocoileus</i>   | <i>sp.</i>       | 908   | 360  | Herbivore | Ruminant     | Kincaid Shelter  | Holocene    | Present Study    | collagen | scapula       | -19.9 | -19.9 | 5.6 |      |      | 3.0  |
| Artiodactyla | Cervidae  | <i>Odocoileus</i>   | <i>sp.</i>       | 908   | 403  | Herbivore | Ruminant     | Kincaid Shelter  | Holocene    | Present Study    | collagen | tooth root    | -18.1 | -18.1 | 8.1 |      |      | 3.0  |
| Artiodactyla | Cervidae  | <i>Odocoileus</i>   | <i>sp.</i>       | 908   | 709  | Herbivore | Ruminant     | Kincaid Shelter  | Holocene    | Present Study    | collagen | metacarpal    | -17.6 | -17.6 | 6.6 |      |      | 2.8  |
| Artiodactyla | Cervidae  | <i>Odocoileus</i>   | <i>sp.</i>       | 908   | 818  | Herbivore | Ruminant     | Kincaid Shelter  | Holocene    | Present Study    | collagen | metacarpal    | -19.9 | -19.9 | 6.1 |      |      | 3.0  |
| Artiodactyla | Cervidae  | <i>Odocoileus</i>   | <i>sp.</i>       | 908   | 825  | Herbivore | Ruminant     | Kincaid Shelter  | Holocene    | Present Study    | collagen | n/a           | -19.8 | -19.8 | 6.0 |      |      | 3.0  |
| Artiodactyla | Cervidae  | <i>Odocoileus</i>   | <i>sp.</i>       | 908   | 826  | Herbivore | Ruminant     | Kincaid Shelter  | Holocene    | Present Study    | collagen | dentary       | -18.1 | -18.1 | 5.4 |      |      | 2.8  |
| Artiodactyla | Cervidae  | <i>Odocoileus</i>   | <i>sp.</i>       | 908   | 1438 | Herbivore | Ruminant     | Kincaid Shelter  | Holocene    | Present Study    | collagen | rib           | -19.7 | -19.7 | 5.3 |      |      | 2.8  |
| Artiodactyla | Cervidae  | <i>Odocoileus</i>   | <i>sp.</i>       | 908   | 1629 | Herbivore | Ruminant     | Kincaid Shelter  | Holocene    | Present Study    | collagen | metacarpal    | -19.3 | -19.3 | 6.1 |      |      | 2.9  |
| Artiodactyla | Cervidae  | <i>Odocoileus</i>   | <i>sp.</i>       | 908   | 1672 | Herbivore | Ruminant     | Kincaid Shelter  | Holocene    | Present Study    | collagen | n/a           | -17.5 | -17.5 | 7.5 |      | -0.8 | 2.9  |
| Artiodactyla | Cervidae  | <i>Odocoileus</i>   | <i>sp.</i>       | 908   | 1756 | Herbivore | Ruminant     | Kincaid Shelter  | Holocene    | Present Study    | enamel   | premolar 4    | -9.9  | -18.7 | NA  | 29.8 | -1.0 | nd   |
| Artiodactyla | Cervidae  | <i>Odocoileus</i>   | <i>sp.</i>       | 908   | 1879 | Herbivore | Ruminant     | Kincaid Shelter  | Holocene    | Present Study    | collagen | metacarpal    | -18.5 | -18.5 | 7.7 |      |      | 2.8  |
| Artiodactyla | Cervidae  | <i>Odocoileus</i>   | <i>sp.</i>       | 908   | 2184 | Herbivore | Ruminant     | Kincaid Shelter  | Holocene    | Present Study    | collagen | n/a           | -20.8 | -20.8 | 5.2 |      |      | 2.8  |
| Artiodactyla | Cervidae  | <i>Odocoileus</i>   | <i>sp.</i>       | 908   | 2229 | Herbivore | Ruminant     | Kincaid Shelter  | Holocene    | Present Study    | collagen | metacarpal    | -20.1 | -20.1 | 5.8 |      |      | 3.0  |
| Artiodactyla | Cervidae  | <i>Odocoileus</i>   | <i>sp.</i>       | 908   | 2255 | Herbivore | Ruminant     | Kincaid Shelter  | Holocene    | Present Study    | collagen | thoracic vert | -20.7 | -20.7 | 5.3 |      |      | 2.9  |
| Artiodactyla | Cervidae  | <i>Odocoileus</i>   | <i>sp.</i>       | 908   | 2280 | Herbivore | Ruminant     | Kincaid Shelter  | Holocene    | Present Study    | collagen | n/a           | -17.9 | -17.9 | 5.9 |      |      | 2.9  |
| Artiodactyla | Cervidae  | <i>Odocoileus</i>   | <i>sp.</i>       | 908   | 3255 | Herbivore | Ruminant     | Kincaid Shelter  | Holocene    | Present Study    | collagen | phalanx 1     | -19.8 | -19.8 | 5.4 |      |      | 2.8  |
| Artiodactyla | Cervidae  | <i>Odocoileus</i>   | <i>sp.</i>       | 908   | 3306 | Herbivore | Ruminant     | Kincaid Shelter  | Holocene    | Present Study    | collagen | metatarsal    | -19.4 | -19.4 | 7.1 |      |      | 2.9  |
| Artiodactyla | Cervidae  | <i>Odocoileus</i>   | <i>sp.</i>       | 908   | 3348 | Herbivore | Ruminant     | Kincaid Shelter  | Holocene    | Present Study    | collagen | n/a           | -20.4 | -20.4 | 5.8 |      |      | 2.9  |
| Artiodactyla | Cervidae  | <i>Odocoileus</i>   | <i>sp.</i>       | 908   | 3469 | Herbivore | Ruminant     | Kincaid Shelter  | Pleistocene | Present Study    | collagen | dentary       | -19.5 | -19.5 | 4.7 |      |      | 2.9  |
| Artiodactyla | Cervidae  | <i>Odocoileus</i>   | <i>sp.</i>       | 908   | 3614 | Herbivore | Ruminant     | Kincaid Shelter  | Holocene    | Present Study    | collagen | n/a           | -20.4 | -20.4 | 5.8 |      |      | 2.8  |
| Artiodactyla | Cervidae  | <i>Odocoileus</i>   | <i>sp.</i>       | 908   | 3832 | Herbivore | Ruminant     | Kincaid Shelter  | Holocene    | Present Study    | collagen | molar 2 root  | -17.7 | -17.7 | 6.9 |      |      | 2.8  |
| Artiodactyla | Cervidae  | <i>Odocoileus</i>   | <i>sp.</i>       | 908   | 3833 | Herbivore | Ruminant     | Kincaid Shelter  | Pleistocene | Present Study    | collagen | dentary       | -19.0 | -19.0 | 7.9 |      |      | 2.8  |
| Artiodactyla | Cervidae  | <i>Odocoileus</i>   | <i>sp.</i>       | 908   | 3837 | Herbivore | Ruminant     | Kincaid Shelter  | Holocene    | Present Study    | collagen | phalanx 1     | -18.3 | -18.3 | 7.8 |      |      | 2.9  |
| Artiodactyla | Cervidae  | <i>Odocoileus</i>   | <i>sp.</i>       | 908   | 3839 | Herbivore | Ruminant     | Kincaid Shelter  | Holocene    | Present Study    | collagen | phalanx 1     | -17.1 | -17.1 | 6.1 |      |      | 2.8  |
| Artiodactyla | Cervidae  | <i>Odocoileus</i>   | <i>sp.</i>       | 908   | 3922 | Herbivore | Ruminant     | Kincaid Shelter  | Holocene    | Present Study    | collagen | phalanx 1     | -15.9 | -15.9 | 7.5 |      |      | 3.3  |
| Artiodactyla | Cervidae  | <i>Odocoileus</i>   | <i>sp.</i>       | 908   | 3924 | Herbivore | Ruminant     | Kincaid Shelter  | Holocene    | Present Study    | collagen | dentary       | -19.4 | -19.4 | 9.5 |      |      | 3.1  |
| Artiodactyla | Cervidae  | <i>Odocoileus</i>   | <i>sp.</i>       | 908   | 3925 | Herbivore | Ruminant     | Kincaid Shelter  | Pleistocene | Present Study    | collagen | tooth root    | -18.1 | -18.1 | 8.0 |      |      | 2.8  |
| Artiodactyla | Cervidae  | <i>Odocoileus</i>   | <i>sp.</i>       | 908   | 3943 | Herbivore | Ruminant     | Kincaid Shelter  | Holocene    | Present Study    | collagen | metacarpal    | -19.9 | -19.9 | 6.8 |      |      | 2.9  |
| Artiodactyla | Cervidae  | <i>Odocoileus</i>   | <i>sp.</i>       | 908   | 3945 | Herbivore | Ruminant     | Kincaid Shelter  | Holocene    | Present Study    | collagen | metacarpal    | -19.5 | -19.5 | 5.9 |      |      | 2.8  |
| Artiodactyla | Cervidae  | <i>Odocoileus</i>   | <i>sp.</i>       | 908   | 3950 | Herbivore | Ruminant     | Kincaid Shelter  | Holocene    | Present Study    | collagen | metacarpal    | -18.5 | -18.5 | 7.9 |      |      | 2.8  |
| Artiodactyla | Cervidae  | <i>Odocoileus</i>   | <i>sp.</i>       | 908   | 3953 | Herbivore | Ruminant     | Kincaid Shelter  | Holocene    | Present Study    | collagen | metatarsal    | -19.9 | -19.9 | 6.2 |      |      | 2.8  |
| Artiodactyla | Cervidae  | <i>Odocoileus</i>   | <i>sp.</i>       | 908   | 3959 | Herbivore | Ruminant     | Kincaid Shelter  | Holocene    | Present Study    | collagen | radius        | -16.8 | -16.8 | 8.7 |      |      | 3.0  |
| Artiodactyla | Cervidae  | <i>Odocoileus</i>   | <i>sp.</i>       | 908   | 3987 | Herbivore | Ruminant     | Kincaid Shelter  | Holocene    | Present Study    | collagen | dentary       | -19.4 | -19.4 | 6.4 |      |      | 2.8  |
| Artiodactyla | Cervidae  | <i>Odocoileus</i>   | <i>sp.</i>       | 908   | 3990 | Herbivore | Ruminant     | Kincaid Shelter  | Pleistocene | Present Study    | collagen | dentary       | -19.6 | -19.6 | 6.1 |      |      | 2.8  |
| Artiodactyla | Cervidae  | <i>Odocoileus</i>   | <i>sp.</i>       | 908   | 3991 | Herbivore | Ruminant     | Kincaid Shelter  | Pleistocene | Present Study    | collagen | dentary       | -18.4 | -18.4 | 6.3 |      |      | 2.8  |
| Artiodactyla | Cervidae  | <i>Odocoileus</i>   | <i>sp.</i>       | 908   | 3992 | Herbivore | Ruminant     | Kincaid Shelter  | Pleistocene | Present Study    | collagen | dentary       | -19.8 | -19.8 | 6.0 |      |      | 2.9  |
| Artiodactyla | Cervidae  | <i>Odocoileus</i>   | <i>sp.</i>       | 908   | 3994 | Herbivore | Ruminant     | Kincaid Shelter  | Holocene    | Present Study    | collagen | tooth root    | -19.3 | -19.3 | 6.9 |      |      | 2.7  |
| Artiodactyla | Cervidae  | <i>Odocoileus</i>   | <i>sp.</i>       | 908   | 4113 | Herbivore | Ruminant     | Kincaid Shelter  | Holocene    | Present Study    | collagen | n/a           | -19.9 | -19.9 | 6.5 |      |      | 3.0  |
| Artiodactyla | Cervidae  | <i>Odocoileus</i>   | <i>sp.</i>       | 933   | 3675 | Herbivore | Ruminant     | Friesenhahn Cave | Pleistocene | Present Study    | enamel   | molar 3       | -11.7 | -20.6 | NA  | 28.1 | -2.7 | nd   |
| Artiodactyla | Cervidae  | <i>Odocoileus</i>   | <i>sp.</i>       | 933   | 3962 | Herbivore | Ruminant     | Friesenhahn Cave | Pleistocene | Present Study    | collagen | n/a           | -20.9 | -20.9 | 6.1 |      |      | 2.9  |
| Artiodactyla | Cervidae  | <i>Odocoileus</i>   | <i>sp.</i>       | 30967 | 107  | Herbivore | Ruminant     | Ingleside        | Pleistocene | Present Study    | enamel   | premolar 3    | -12.1 | -20.9 | NA  | 29.3 | -1.5 | nd   |
| Artiodactyla | Cervidae  | <i>Odocoileus</i>   | <i>sp.</i>       | 30967 | 107  | Herbivore | Non-ruminant | Ingleside        | Pleistocene | Yann et al. 2016 | enamel   | tooth         | -11.9 | -20.7 |     |      |      |      |

|              |             |                   |                                |       |        |           |              |                   |             |                  |          |                |       |       |      |      |      |       |
|--------------|-------------|-------------------|--------------------------------|-------|--------|-----------|--------------|-------------------|-------------|------------------|----------|----------------|-------|-------|------|------|------|-------|
| Artiodactyla | Cervidae    | <i>Odocoileus</i> | <i>sp.</i>                     | 40451 | 125    | Herbivore | Ruminant     | Wunderlich Site   | Holocene    | Present Study    | enamel   | molar 2        | -10.3 | -19.1 | NA   | 29.9 | -0.9 | nd    |
| Artiodactyla | Cervidae    | <i>Odocoileus</i> | <i>sp.</i>                     | 40451 | 139    | Herbivore | Ruminant     | Wunderlich Site   | Holocene    | Present Study    | enamel   | molar          | -9.4  | -18.3 | NA   | 28.9 | -1.9 | nd    |
| Artiodactyla | Cervidae    | <i>Odocoileus</i> | <i>sp.</i>                     | 41229 | 462    | Herbivore | Ruminant     | Hall's Cave       | Holocene    | Present Study    | collagen | astragalus     | -19.5 | -19.5 | 5.7  |      |      | 2.7   |
| Artiodactyla | Cervidae    | <i>Odocoileus</i> | <i>sp.</i>                     | 41229 | 643    | Herbivore | Ruminant     | Hall's Cave       | Holocene    | Present Study    | collagen | metatarsal     | -19.5 | -19.5 | 7.8  |      |      | 2.9   |
| Artiodactyla | Cervidae    | <i>Odocoileus</i> | <i>sp.</i>                     | 41229 | 645    | Herbivore | Ruminant     | Hall's Cave       | Holocene    | Present Study    | collagen | metacarpal     | -18.9 | -18.9 | 7.1  |      |      | 2.8   |
| Artiodactyla | Cervidae    | <i>Odocoileus</i> | <i>sp.</i>                     | 41229 | 646    | Herbivore | Ruminant     | Hall's Cave       | Pleistocene | Present Study    | collagen | tibia          | -19.2 | -19.2 | 11.1 |      |      | 2.8   |
| Artiodactyla | Cervidae    | <i>Odocoileus</i> | <i>sp.</i>                     | 41229 | 672    | Herbivore | Ruminant     | Hall's Cave       | Holocene    | Present Study    | collagen | naviculocubx   | -19.9 | -19.9 | 5.7  |      |      | 2.8   |
| Artiodactyla | Cervidae    | <i>Odocoileus</i> | <i>sp.</i>                     | 41229 | 673    | Herbivore | Ruminant     | Hall's Cave       | Holocene    | Present Study    | collagen | astragalus     | -19.9 | -19.9 | 6.7  |      |      | 2.8   |
| Artiodactyla | Cervidae    | <i>Odocoileus</i> | <i>sp.</i>                     | 41229 | 675    | Herbivore | Ruminant     | Hall's Cave       | Holocene    | Present Study    | collagen | orbit          | -18.3 | -18.3 | 5.7  |      |      | 2.9   |
| Artiodactyla | Cervidae    | <i>Odocoileus</i> | <i>sp.</i>                     | 41229 | 676    | Herbivore | Ruminant     | Hall's Cave       | Holocene    | Present Study    | collagen | jugal          | -18.3 | -18.3 | 5.8  |      |      | 2.9   |
| Artiodactyla | Cervidae    | <i>Odocoileus</i> | <i>sp.</i>                     | 41229 | 868    | Herbivore | Ruminant     | Hall's Cave       | Holocene    | Present Study    | collagen | metatarsal     | -19.5 | -19.5 | 5.9  |      |      | 2.7   |
| Artiodactyla | Cervidae    | <i>Odocoileus</i> | <i>sp.</i>                     | 41229 | 975    | Herbivore | Ruminant     | Hall's Cave       | Holocene    | Present Study    | collagen | fibula         | -18.8 | -18.8 | 5.0  |      |      | 2.8   |
| Artiodactyla | Cervidae    | <i>Odocoileus</i> | <i>sp.</i>                     | 41229 | 1001   | Herbivore | Ruminant     | Hall's Cave       | Holocene    | Present Study    | collagen | n/a            | -17.2 | -17.2 | 7.3  |      |      | 2.8   |
| Artiodactyla | Cervidae    | <i>Odocoileus</i> | <i>sp.</i>                     | 41229 | 1055   | Herbivore | Ruminant     | Hall's Cave       | Holocene    | Present Study    | collagen | phalanx        | -20.0 | -20.0 | 4.5  |      |      | 2.7   |
| Artiodactyla | Cervidae    | <i>Odocoileus</i> | <i>sp.</i>                     | 41229 | 8097   | Herbivore | Ruminant     | Hall's Cave       | Holocene    | Present Study    | collagen | cuneiform      | -19.6 | -19.6 | 6.7  |      |      | 2.9   |
| Artiodactyla | Cervidae    | <i>Odocoileus</i> | <i>sp.</i>                     | 41229 | 9333   | Herbivore | Ruminant     | Hall's Cave       | Holocene    | Present Study    | collagen | phalanx 2      | -19.6 | -19.6 | 5.8  |      |      | 2.9   |
| Artiodactyla | Cervidae    | <i>Odocoileus</i> | <i>sp.</i>                     | 41229 | 9869   | Herbivore | Ruminant     | Hall's Cave       | Holocene    | Present Study    | collagen | metatarsal     | -20.4 | -20.4 | 5.9  |      |      | 2.8   |
| Artiodactyla | Cervidae    | <i>Odocoileus</i> | <i>sp.</i>                     | 41229 | 10810  | Herbivore | Ruminant     | Hall's Cave       | Pleistocene | Present Study    | collagen | calcaneus      | -18.4 | -18.4 | 10.3 |      |      | 2.8   |
| Artiodactyla | Cervidae    | <i>Odocoileus</i> | <i>sp.</i>                     | 43133 | 1112   | Herbivore | Ruminant     | Bering Sinkhole   | Holocene    | Present Study    | collagen | dentary        | -19.8 | -19.8 | 6.9  |      |      | 3.1   |
| Artiodactyla | Cervidae    | <i>Odocoileus</i> | <i>sp.</i>                     | 43133 | 1113   | Herbivore | Ruminant     | Bering Sinkhole   | Holocene    | Present Study    | collagen | molar root     | -19.5 | -19.5 | 8.3  |      |      | 2.9   |
| Artiodactyla | Cervidae    | <i>Odocoileus</i> | <i>sp.</i>                     | 43133 | 1115   | Herbivore | Ruminant     | Bering Sinkhole   | Holocene    | Present Study    | collagen | molar root     | -18.7 | -18.7 | 7.0  |      |      | 3.0   |
| Artiodactyla | Cervidae    | <i>Odocoileus</i> | <i>sp.</i>                     | 43133 | 1123   | Herbivore | Ruminant     | Bering Sinkhole   | Holocene    | Present Study    | collagen | dentary        | -18.2 | -18.2 | 6.1  |      |      | 3.1   |
| Artiodactyla | Cervidae    | <i>Odocoileus</i> | <i>sp.</i>                     | 43136 | 1      | Herbivore | Ruminant     | Fawcett's Cave    | Pleistocene | Present Study    | collagen | humerus        | -18.5 | -18.5 | 7.7  |      |      | 2.9   |
| Artiodactyla | Cervidae    | <i>Odocoileus</i> | <i>sp.</i>                     | 40449 | 129    | Herbivore | Ruminant     | Levi Rock Shelter | Holocene    | Present Study    | collagen | humerus        | -24.3 | nd    | -1.1 |      |      | 4.3   |
| Artiodactyla | Cervidae    | <i>Odocoileus</i> | <i>sp.</i>                     | 40449 | 127a   | Herbivore | Ruminant     | Levi Rock Shelter | Holocene    | Present Study    | collagen | dentary        | -24.0 | nd    | 1.1  |      |      | 4.0   |
| Artiodactyla | Cervidae    | <i>Odocoileus</i> | <i>sp.</i>                     | 933   | 3013   | Herbivore | Ruminant     | Friesenhahn Cave  | Pleistocene | Present Study    | collagen | n/a            | -20.8 | -20.8 | 8.0  |      |      | 3.9   |
| Artiodactyla | Cervidae    | <i>Odocoileus</i> | <i>sp.</i>                     | 933   | 458    | Herbivore | Ruminant     | Friesenhahn Cave  | Pleistocene | Present Study    | collagen | n/a            | -20.1 | -20.1 | 7.8  |      |      | 3.5   |
| Artiodactyla | Cervidae    | <i>Odocoileus</i> | <i>sp.</i>                     | 908   | 1080   | Herbivore | Ruminant     | Kincaid Shelter   | Holocene    | Present Study    | collagen | dentary        | -18.7 | nd    | 5.9  |      |      | 7.3   |
| Artiodactyla | Cervidae    | <i>Odocoileus</i> | <i>sp.</i>                     | 908   | 3997   | Herbivore | Ruminant     | Kincaid Shelter   | Holocene    | Present Study    | collagen | cervical verti | -18.7 | nd    | bdl  |      |      | 9.0   |
| Artiodactyla | Cervidae    | <i>Odocoileus</i> | <i>sp.</i>                     | 908   | 1080   | Herbivore | Ruminant     | Kincaid Shelter   | Holocene    | Present Study    | collagen | dentary        | bdl   | nd    | bdl  |      |      | nd    |
| Artiodactyla | Cervidae    | <i>Odocoileus</i> | <i>sp.</i>                     | 30967 | 106    | Herbivore | Ruminant     | Ingliside         | Pleistocene | Present Study    | collagen | n/a            | bdl   | nd    | bdl  |      |      | nd    |
| Artiodactyla | Tayassuidae | <i>Pecari</i>     | <i>tajacu</i>                  | 40685 | 1      | Herbivore | Non-ruminant | Zesch Cave        | Pleistocene | Present Study    | collagen | n/a            | -16.5 | -16.5 | 7.3  |      |      | 3.0   |
| Artiodactyla | Tayassuidae | <i>Pecari</i>     | <i>tajacu</i>                  | 40685 | UNM001 | Herbivore | Non-ruminant | Zesch Cave        | Pleistocene | Present Study    | collagen | n/a            | -15.8 | -15.8 | 7.0  |      |      | 3.3   |
| Artiodactyla | Tayassuidae | <i>Pecari</i>     | <i>tajacu</i>                  | 41229 | 8240   | Herbivore | Non-ruminant | Hall's Cave       | Holocene    | Present Study    | collagen | phalanx        | -16.4 | -16.4 | 6.1  |      |      | 2.9   |
| Artiodactyla | Tayassuidae | <i>Pecari</i>     | <i>tajacu</i>                  | 41229 | 10809  | Herbivore | Non-ruminant | Hall's Cave       | Holocene    | Present Study    | collagen | n/a            | -16.6 | -16.6 | 6.8  |      |      | 3.0   |
| Artiodactyla | Tayassuidae | <i>Platygonus</i> | <i>compressus</i>              | 30967 | 108    | Herbivore | Non-ruminant | Ingliside         | Pleistocene | Yann et al. 2016 | enamel   | tooth          | -9.1  | -17.9 | NA   | 32.3 | 1.4  | nd    |
| Artiodactyla | Tayassuidae | <i>Platygonus</i> | <i>compressus</i>              | 30967 | 918    | Herbivore | Non-ruminant | Ingliside         | Pleistocene | Yann et al. 2016 | enamel   | molar 3        | -8.8  | -17.6 | NA   | 32.6 | 1.7  | nd    |
| Artiodactyla | Tayassuidae | <i>Platygonus</i> | <i>compressus</i>              | 30967 | 108a   | Herbivore | Non-ruminant | Ingliside         | Pleistocene | Present Study    | enamel   | tooth          | -9.1  | -17.9 | NA   | 32.3 | 1.4  | nd    |
| Artiodactyla | Tayassuidae | <i>Platygonus</i> | <i>compressus</i>              | 30967 | 918a   | Herbivore | Non-ruminant | Ingliside         | Pleistocene | Present Study    | enamel   | tooth          | -8.8  | -17.6 | NA   | 32.6 | 1.7  | nd    |
| Artiodactyla | Tayassuidae | <i>Platygonus</i> | <i>compressus</i>              | 41229 | 1364   | Herbivore | Non-ruminant | Hall's Cave       | Pleistocene | Present Study    | collagen | dentary        | -13.2 | nd    | 7.8  |      |      | 5.1   |
| Carnivora    | Canidae     | <i>Canis</i>      | <i>dirus</i>                   | 908   | 118    | Carnivore | Carnivore    | Kincaid Shelter   | Pleistocene | Present Study    | collagen | canine root    | -10.8 | -10.8 | 11.4 |      |      | 2.9   |
| Carnivora    | Canidae     | <i>Canis</i>      | <i>dirus</i>                   | 908   | 2354   | Carnivore | Carnivore    | Kincaid Shelter   | Pleistocene | Present Study    | enamel   | canine         | -4.2  | -9.2  | NA   | 29.1 | -1.7 | nd    |
| Carnivora    | Canidae     | <i>Canis</i>      | <i>dirus</i>                   | 933   | 326    | Carnivore | Carnivore    | Friesenhahn Cave  | Pleistocene | Present Study    | collagen | premolar roc   | -11.2 | -11.2 | 12.7 |      |      | 3.1   |
| Carnivora    | Canidae     | <i>Canis</i>      | <i>dirus</i>                   | 933   | 2201   | Carnivore | Carnivore    | Friesenhahn Cave  | Pleistocene | Present Study    | enamel   | canine         | -6.4  | -11.4 | NA   | 27.8 | -3.0 | nd    |
| Carnivora    | Canidae     | <i>Canis</i>      | <i>dirus</i>                   | 933   | 2201a  | Carnivore | Carnivore    | Friesenhahn Cave  | Pleistocene | Present Study    | enamel   | canine root    | -11.3 | -11.3 | 12.9 |      |      | 3.2   |
| Carnivora    | Canidae     | <i>Canis</i>      | <i>dirus</i>                   | 31141 | 62     | Carnivore | Carnivore    | Aransas River     | Pleistocene | Present Study    | enamel   | molar 1        | -5.5  | -10.5 | NA   | 29.9 | -1.0 | nd    |
| Carnivora    | Canidae     | <i>Canis</i>      | <i>dirus</i>                   | 41229 | 3543   | Carnivore | Carnivore    | Hall's Cave       | Pleistocene | Present Study    | collagen | n/a            | -12.7 | -12.7 | 12.9 |      |      | 2.7   |
| Carnivora    | Canidae     | <i>Canis</i>      | <i>dirus</i>                   | 41229 | 10802  | Carnivore | Carnivore    | Hall's Cave       | Pleistocene | Present Study    | collagen | n/a            | -12.6 | -12.6 | 13.7 |      |      | 2.7   |
| Carnivora    | Canidae     | <i>Canis</i>      | <i>dirus</i>                   | 908   | 2430   | Carnivore | Carnivore    | Kincaid Shelter   | Pleistocene | Present Study    | collagen | premolar roc   | -28.1 | nd    | bdl  |      |      | nd    |
| Carnivora    | Canidae     | <i>Canis</i>      | <i>dirus</i>                   | 908   | 2428   | Carnivore | Carnivore    | Kincaid Shelter   | Pleistocene | Present Study    | collagen | canine root    | -27.8 | nd    | bdl  |      |      | nd    |
| Carnivora    | Canidae     | <i>Canis</i>      | <i>dirus</i>                   | 30967 | 172a   | Carnivore | Carnivore    | Ingliside         | Pleistocene | Present Study    | collagen | humerus        | -24.9 | nd    | bdl  |      |      | 5.8   |
| Carnivora    | Canidae     | <i>Canis</i>      | <i>dirus</i>                   | 40449 | 175    | Carnivore | Carnivore    | Levi Rock Shelter | Pleistocene | Present Study    | collagen | n/a            | -19.7 | -19.7 | 7.1  |      |      | 3.3   |
| Carnivora    | Canidae     | <i>Canis</i>      | <i>dirus</i>                   | 933   | 1907b  | Carnivore | Carnivore    | Friesenhahn Cave  | Pleistocene | Present Study    | collagen | n/a            | -19.5 | nd    | bdl  |      |      | 4.3   |
| Carnivora    | Canidae     | <i>Canis</i>      | <i>dirus</i>                   | 30967 | 172    | Carnivore | Carnivore    | Ingliside         | Pleistocene | Present Study    | collagen | cervical verti | bdl   | nd    | bdl  |      |      | nd    |
| Carnivora    | Canidae     | <i>Canis</i>      | <i>dirus</i>                   | 908   | 2429   | Carnivore | Carnivore    | Kincaid Shelter   | Pleistocene | Present Study    | collagen | femur          | bdl   | nd    | bdl  |      |      | nd    |
| Carnivora    | Canidae     | <i>Canis</i>      | <i>dirus</i>                   | 40449 | 563    | Carnivore | Carnivore    | Levi Rock Shelter | Pleistocene | Present Study    | collagen | dentary        | bdl   | nd    | bdl  |      |      | bdl   |
| Carnivora    | Canidae     | <i>Canis</i>      | <i>familiaris</i>              | 908   | 383    | Carnivore | Carnivore    | Kincaid Shelter   | Holocene    | Present Study    | collagen | dentary        | -14.5 | -14.5 | 7.8  |      |      | 3.1   |
| Carnivora    | Canidae     | <i>Canis</i>      | <i>familiaris</i>              | 43133 | 220    | Carnivore | Carnivore    | Bering Sinkhole   | Holocene    | Present Study    | collagen | ulna           | -16.8 | -16.8 | 9.0  |      |      | 3.0   |
| Carnivora    | Canidae     | <i>Canis</i>      | <i>familiaris</i>              | 43202 | 77     | Carnivore | Carnivore    | Ranny Creek Cave  | Holocene    | Present Study    | collagen | maxilla        | -19.1 | -19.1 | 8.4  |      |      | 3.3   |
| Carnivora    | Canidae     | <i>Canis</i>      | <i>familiaris</i>              | 43202 | 79     | Carnivore | Carnivore    | Ranny Creek Cave  | Holocene    | Present Study    | collagen | ulna           | -19.1 | -19.1 | 8.3  |      |      | 3.1   |
| Carnivora    | Canidae     | <i>Canis</i>      | <i>familiaris</i>              | 43133 | 219    | Carnivore | Carnivore    | Bering Sinkhole   | Holocene    | Present Study    | enamel   | premolar 4     | bdl   | nd    | na   |      |      | nd    |
| Carnivora    | Canidae     | <i>Canis</i>      | <i>familiaris/latrans (cf)</i> | 220   | 27     | Carnivore | Carnivore    | Jess Cox Ranch    | Holocene    | Present Study    | collagen | femur          | -17.8 | -17.8 | 10.5 |      |      | 2.8   |
| Carnivora    | Canidae     | <i>Canis</i>      | <i>familiaris/latrans (cf)</i> | 908   | 3938   | Carnivore | Carnivore    | Kincaid Shelter   | Holocene    | Present Study    | collagen | maxilla        | -12.0 | -12.0 | 10.1 |      |      | 2.8   |
| Carnivora    | Canidae     | <i>Canis</i>      | <i>familiaris/latrans (cf)</i> | 908   | 3939   | Carnivore | Carnivore    | Kincaid Shelter   | Holocene    | Present Study    | collagen | n/a            | -13.8 | -13.8 | 9.8  |      |      | 3.0   |
| Carnivora    | Canidae     | <i>Canis</i>      | <i>familiaris/latrans (cf)</i> | 908   | 4262   | Carnivore | Carnivore    | Kincaid Shelter   | Holocene    | Present Study    | collagen | skull          | -16.1 | -16.1 | 7.1  |      |      | 2.9   |
| Carnivora    | Canidae     | <i>Canis</i>      | <i>familiaris/latrans (cf)</i> | 908   | 4294   | Carnivore | Carnivore    | Kincaid Shelter   | Holocene    | Present Study    | collagen | humerus        | -11.7 | -11.7 | 9.2  |      |      | 2.8   |
| Carnivora    | Canidae     | <i>Canis</i>      | <i>familiaris/latrans (cf)</i> | 908   | 4297   | Carnivore | Carnivore    | Kincaid Shelter   | Holocene    | Present Study    | collagen | radius         | -16.9 | -16.9 | 7.7  |      |      | 3.0   |
| Carnivora    | Canidae     | <i>Canis</i>      | <i>familiaris/latrans (cf)</i> | 908   | 4324   | Carnivore | Carnivore    | Kincaid Shelter   | Holocene    | Present Study    | collagen | dentary        | -15.1 | -15.1 | 9.7  |      |      | 3.0   |
| Carnivora    | Canidae     | <i>Canis</i>      | <i>familiaris/latrans (cf)</i> | 908   | 4469   | Carnivore | Carnivore    | Kincaid Shelter   | Holocene    | Present Study    | collagen | ulna           | -16.5 | -16.5 | 9.9  |      |      | 2.8   |
| Carnivora    | Canidae     | <i>Canis</i>      | <i>familiaris/latrans (cf)</i> | 41229 | 6561   | Carnivore | Carnivore    | Hall's Cave       | Holocene    | Present Study    | collagen | n/a            | -16.6 | -16.6 | 7.9  |      |      | 2.8   |
| Carnivora    | Canidae     | <i>Canis</i>      | <i>familiaris/latrans (cf)</i> | 43202 | 5      | Carnivore | Carnivore    | Ranny Creek Cave  | Holocene    | Present Study    | collagen | femur          | -17.1 | -17.1 | 7.5  |      |      | 2.8   |
| Carnivora    | Canidae     | <i>Canis</i>      | <i>familiaris/latrans (cf)</i> | 43202 | 73     | Carnivore | Carnivore    | Ranny Creek Cave  | Holocene    | Present Study    | collagen | maxilla        | -19.2 | -19.2 | 9.7  |      |      | 3.3   |
| Carnivora    | Canidae     | <i>Canis</i>      | <i>familiaris/latrans (cf)</i> | 908   | 4267   | Carnivore | Carnivore    | Kincaid Shelter   | Holocene    | Present Study    | collagen | skull          | bdl   | nd    | bdl  |      |      | 13.1  |
| Carnivora    | Canidae     | <i>Canis</i>      | <i>latrans</i>                 | 220   | 36     | Carnivore | Carnivore    | Jess Cox Ranch    | Holocene    | Present Study    | collagen | dentary        | -16.4 | -16.4 | 8.4  |      |      | 3.0   |
| Carnivora    | Canidae     | <i>Canis</i>      | <i>latrans</i>                 | 908   | 341    | Carnivore | Carnivore    | Kincaid Shelter   | Holocene    | Present Study    | collagen | premolar roc   | -10.1 | -10.1 | 11.4 |      |      | 2.9   |
| Carnivora    | Canidae     | <i>Canis</i>      | <i>latrans</i>                 | 908   | 347    | Carnivore | Carnivore    | Kincaid Shelter   | Holocene    | Present Study    | collagen | metatarsal 2   | -10.4 | -10.4 | 10.1 |      |      | 3.0   |
| Carnivora    | Canidae     | <i>Canis</i>      | <i>latrans</i>                 | 908   | 382    | Carnivore | Carnivore    | Kincaid Shelter   | Holocene    | Present Study    | collagen | metatarsal 2   | -10.2 | -10.2 | 9.6  |      |      | 2.8   |
| Carnivora    | Canidae     | <i>Canis</i>      | <i>latrans</i>                 | 908   | 437    | Carnivore | Carnivore    | Kincaid Shelter   | Holocene    | Present Study    | collagen | humerus        | -13.8 | -13.8 | 7.8  |      |      | 2.9   |
| Carnivora    | Canidae     | <i>Canis</i>      | <i>latrans</i>                 | 908   | 820    | Carnivore | Carnivore    | Kincaid Shelter   | Holocene    | Present Study    | collagen | lumbar verte   | -13.0 | -13.0 | 8.8  |      |      | 2.9</ |

|           |           |                          |                            |       |        |           |           |                    |             |               |          |                |       |       |      |      |
|-----------|-----------|--------------------------|----------------------------|-------|--------|-----------|-----------|--------------------|-------------|---------------|----------|----------------|-------|-------|------|------|
| Carnivora | Canidae   | <i>Canis</i>             | <i>latrans</i>             | 41229 | 2539   | Carnivore | Carnivore | Hall's Cave        | Holocene    | Present Study | collagen | phalanx 2      | -12.5 | -12.5 | 8.1  | 2.8  |
| Carnivora | Canidae   | <i>Canis</i>             | <i>latrans</i>             | 41229 | 2554   | Carnivore | Carnivore | Hall's Cave        | Holocene    | Present Study | collagen | atlas vertebra | -16.2 | -16.2 | 9.4  | 2.8  |
| Carnivora | Canidae   | <i>Canis</i>             | <i>latrans</i>             | 41229 | 2588   | Carnivore | Carnivore | Hall's Cave        | Holocene    | Present Study | collagen | calcaneus      | -14.2 | -14.2 | 7.0  | 2.8  |
| Carnivora | Canidae   | <i>Canis</i>             | <i>latrans</i>             | 41229 | 2598   | Carnivore | Carnivore | Hall's Cave        | Holocene    | Present Study | collagen | metatarsal 4   | -17.0 | -17.0 | 7.2  | 2.8  |
| Carnivora | Canidae   | <i>Canis</i>             | <i>latrans</i>             | 41229 | 4004   | Carnivore | Carnivore | Hall's Cave        | Holocene    | Present Study | collagen | n/a            | -11.6 | -11.6 | 9.6  | 2.8  |
| Carnivora | Canidae   | <i>Canis</i>             | <i>latrans</i>             | 41229 | 11094  | Carnivore | Carnivore | Hall's Cave        | Pleistocene | Present Study | collagen | n/a            | -11.9 | -11.9 | 12.3 | 2.7  |
| Carnivora | Canidae   | <i>Canis</i>             | <i>latrans</i>             | 43133 | 1413   | Carnivore | Carnivore | Bering Sinkhole    | Holocene    | Present Study | collagen | humerus        | -17.7 | -17.7 | 7.2  | 2.9  |
| Carnivora | Canidae   | <i>Canis</i>             | <i>latrans</i>             | 43133 | 1426   | Carnivore | Carnivore | Bering Sinkhole    | Holocene    | Present Study | collagen | n/a            | -11.6 | -11.6 | 9.2  | 2.7  |
| Carnivora | Canidae   | <i>Canis</i>             | <i>latrans</i>             | 43202 | 43     | Carnivore | Carnivore | Ranny Creek Cave   | Holocene    | Present Study | collagen | una            | -14.6 | -14.6 | 8.1  | 2.7  |
| Carnivora | Canidae   | <i>Canis</i>             | <i>latrans</i>             | 43481 | 4      | Carnivore | Carnivore | West Culp Site     | Holocene    | Present Study | collagen | una            | -12.3 | -12.3 | 8.6  | 2.8  |
| Carnivora | Canidae   | <i>Canis</i>             | <i>latrans</i>             | 908   | 2316   | Carnivore | Carnivore | Kincaid Shelter    | Pleistocene | Present Study | collagen | una            | -27.7 | nd    | bdl  | nd   |
| Carnivora | Canidae   | <i>Canis</i>             | <i>latrans</i>             | 933   | 1625   | Carnivore | Carnivore | Friesenhahn Cave   | Pleistocene | Present Study | collagen | n/a            | -16.5 | -16.5 | 10.7 | 3.5  |
| Carnivora | Canidae   | <i>Canis</i>             | <i>latrans</i>             | 933   | 670    | Carnivore | Carnivore | Friesenhahn Cave   | Pleistocene | Present Study | collagen | dentary        | -16.2 | -16.2 | 10.1 | 3.4  |
| Carnivora | Canidae   | <i>Canis</i>             | <i>latrans</i>             | 1295  | 1      | Carnivore | Carnivore | Clamp Cave         | Pleistocene | Present Study | collagen | dentary        | bdl   | nd    | bdl  | 5.0  |
| Carnivora | Canidae   | <i>Canis</i>             | <i>latrans</i>             | 40685 | 773    | Carnivore | Carnivore | Zesch Cave         | Pleistocene | Present Study | collagen | skull          | bdl   | nd    | bdl  | nd   |
| Carnivora | Canidae   | <i>Canis</i>             | <i>latrans</i>             | NA    | 567407 | Carnivore | Carnivore | Texas              | Modern      | Present Study | collagen | bone           | -20.6 | -20.6 | 11.3 | 3.5  |
| Carnivora | Canidae   | <i>Canis</i>             | <i>latrans</i>             | NA    | 567403 | Carnivore | Carnivore | Texas              | Modern      | Present Study | collagen | bone           | -18.2 | -18.2 | 12.7 | 3.1  |
| Carnivora | Canidae   | <i>Canis</i>             | <i>latrans</i>             | NA    | 567408 | Carnivore | Carnivore | Texas              | Modern      | Present Study | collagen | bone           | -17.9 | -17.9 | 9.7  | 2.7  |
| Carnivora | Canidae   | <i>Canis</i>             | <i>latrans</i>             | NA    | 567398 | Carnivore | Carnivore | Texas              | Modern      | Present Study | collagen | bone           | -17.6 | -17.6 | 11.0 | 3.0  |
| Carnivora | Canidae   | <i>Canis</i>             | <i>latrans</i>             | NA    | 567409 | Carnivore | Carnivore | Texas              | Modern      | Present Study | collagen | bone           | -17.5 | -17.5 | 11.4 | 2.8  |
| Carnivora | Canidae   | <i>Canis</i>             | <i>latrans</i>             | NA    | 567385 | Carnivore | Carnivore | Texas              | Modern      | Present Study | collagen | bone           | -17.5 | -17.5 | 12.7 | 3.1  |
| Carnivora | Canidae   | <i>Canis</i>             | <i>latrans</i>             | NA    | 567396 | Carnivore | Carnivore | Texas              | Modern      | Present Study | collagen | bone           | -16.7 | -16.7 | 11.2 | 3.0  |
| Carnivora | Canidae   | <i>Canis</i>             | <i>latrans</i>             | NA    | 567394 | Carnivore | Carnivore | Texas              | Modern      | Present Study | collagen | bone           | -16.2 | -16.2 | 10.4 | 2.9  |
| Carnivora | Canidae   | <i>Canis</i>             | <i>latrans</i>             | NA    | 567410 | Carnivore | Carnivore | Texas              | Modern      | Present Study | collagen | bone           | -16.1 | -16.1 | 10.3 | 2.7  |
| Carnivora | Canidae   | <i>Canis</i>             | <i>latrans</i>             | NA    | 567393 | Carnivore | Carnivore | Texas              | Modern      | Present Study | collagen | bone           | -16.0 | -16.0 | 11.9 | 2.9  |
| Carnivora | Canidae   | <i>Canis</i>             | <i>latrans</i>             | NA    | 567411 | Carnivore | Carnivore | Texas              | Modern      | Present Study | collagen | bone           | -15.7 | -15.7 | 10.2 | 2.7  |
| Carnivora | Canidae   | <i>Canis</i>             | <i>latrans</i>             | NA    | 567383 | Carnivore | Carnivore | Texas              | Modern      | Present Study | collagen | bone           | -15.5 | -15.5 | 10.1 | 2.7  |
| Carnivora | Canidae   | <i>Canis</i>             | <i>latrans</i>             | NA    | 567382 | Carnivore | Carnivore | Texas              | Modern      | Present Study | collagen | bone           | -15.3 | -15.3 | 11.4 | 2.7  |
| Carnivora | Canidae   | <i>Canis</i>             | <i>latrans</i>             | NA    | 567395 | Carnivore | Carnivore | Texas              | Modern      | Present Study | collagen | bone           | -14.0 | -14.0 | 10.0 | 2.9  |
| Carnivora | Canidae   | <i>Canis</i>             | <i>lupus</i>               | 892   | 256    | Carnivore | Carnivore | Lubbock Lake       | Pleistocene | Present Study | collagen | maxilla        | -11.9 | -11.9 | 10.1 | 3.0  |
| Carnivora | Canidae   | <i>Canis</i>             | <i>lupus</i>               | 41229 | 700    | Carnivore | Carnivore | Hall's Cave        | Holocene    | Present Study | collagen | metacarpal     | -9.4  | -9.4  | 10.4 | 2.8  |
| Carnivora | Canidae   | <i>Canis</i>             | <i>lupus</i>               | 41229 | 3575   | Carnivore | Carnivore | Hall's Cave        | Holocene    | Present Study | collagen | n/a            | -7.7  | -7.7  | 11.7 | 2.8  |
| Carnivora | Canidae   | <i>Canis</i>             | <i>lupus</i>               | 41229 | 3743   | Carnivore | Carnivore | Hall's Cave        | Pleistocene | Present Study | collagen | n/a            | -16.5 | -16.5 | 12.6 | 2.8  |
| Carnivora | Canidae   | <i>Canis</i>             | <i>lupus</i>               | 41229 | 10812  | Carnivore | Carnivore | Hall's Cave        | Pleistocene | Present Study | collagen | metatarsal 3   | -11.6 | -11.5 | 12.6 | 2.9  |
| Carnivora | Canidae   | <i>Canis</i>             | <i>lupus</i>               | 41229 | 12042  | Carnivore | Carnivore | Hall's Cave        | Holocene    | Present Study | collagen | dentary        | -10.6 | -10.6 | 10.9 | 2.9  |
| Carnivora | Canidae   | <i>Canis</i>             | <i>lupus</i>               | 41229 | 15781  | Carnivore | Carnivore | Hall's Cave        | Holocene    | Present Study | collagen | dentary        | -17.7 | -17.7 | 6.3  | 2.9  |
| Carnivora | Canidae   | <i>Canis</i>             | <i>lupus</i>               | 41229 | 19882  | Carnivore | Carnivore | Hall's Cave        | Holocene    | Present Study | collagen | metatarsal     | -17.3 | -17.3 | 7.7  | 2.9  |
| Carnivora | Canidae   | <i>Canis</i>             | <i>lupus</i>               | 41352 | 1      | Carnivore | Carnivore | Sam near San Antor | Holocene    | Present Study | collagen | dentary        | -9.7  | -9.7  | 11.4 | 2.9  |
| Carnivora | Canidae   | <i>Canis</i>             | <i>lupus</i>               | 43133 | 232    | Carnivore | Carnivore | Bering Sinkhole    | Holocene    | Present Study | collagen | skull          | -10.4 | -10.4 | 10.1 | 2.9  |
| Carnivora | Canidae   | <i>Canis</i>             | <i>lupus</i>               | 43133 | 236    | Carnivore | Carnivore | Bering Sinkhole    | Holocene    | Present Study | collagen | dentary        | -9.5  | -9.5  | 9.9  | 2.7  |
| Carnivora | Canidae   | <i>Canis</i>             | <i>sp.</i>                 | 908   | 3627   | Carnivore | Carnivore | Kincaid Shelter    | Holocene    | Present Study | collagen | atlas vertebra | -16.0 | -16.0 | 7.1  | 2.8  |
| Carnivora | Canidae   | <i>Canis</i>             | <i>sp.</i>                 | 908   | 4282   | Carnivore | Carnivore | Kincaid Shelter    | Holocene    | Present Study | collagen | incisor root   | -11.1 | -11.1 | 11.5 | 2.9  |
| Carnivora | Canidae   | <i>Canis</i>             | <i>sp.</i>                 | 908   | 4283   | Carnivore | Carnivore | Kincaid Shelter    | Holocene    | Present Study | collagen | premolur root  | -12.7 | -12.7 | 10.0 | 2.8  |
| Carnivora | Canidae   | <i>Canis</i>             | <i>sp.</i>                 | 908   | 4291   | Carnivore | Carnivore | Kincaid Shelter    | Holocene    | Present Study | collagen | humerus        | -13.6 | -13.6 | 8.4  | 2.8  |
| Carnivora | Canidae   | <i>Canis</i>             | <i>sp.</i>                 | 908   | 4308   | Carnivore | Carnivore | Kincaid Shelter    | Holocene    | Present Study | collagen | fibula         | -13.7 | -13.7 | 8.9  | 2.8  |
| Carnivora | Canidae   | <i>Canis</i>             | <i>sp.</i>                 | 908   | 4309   | Carnivore | Carnivore | Kincaid Shelter    | Holocene    | Present Study | collagen | scapula        | -14.1 | -14.1 | 10.3 | 3.0  |
| Carnivora | Canidae   | <i>Canis</i>             | <i>sp.</i>                 | 908   | 4521   | Carnivore | Carnivore | Kincaid Shelter    | Holocene    | Present Study | collagen | metacarpal     | -13.0 | -13.0 | 9.6  | 3.1  |
| Carnivora | Canidae   | <i>Canis</i>             | <i>sp.</i>                 | 908   | 4522   | Carnivore | Carnivore | Kincaid Shelter    | Holocene    | Present Study | collagen | metacarpal     | -10.6 | -10.6 | 10.3 | 2.9  |
| Carnivora | Canidae   | <i>Canis</i>             | <i>sp.</i>                 | 41229 | 720    | Carnivore | Carnivore | Hall's Cave        | Holocene    | Present Study | collagen | metacarpal     | -15.6 | -15.6 | 6.9  | 2.9  |
| Carnivora | Canidae   | <i>Canis</i>             | <i>sp.</i>                 | 41229 | 721    | Carnivore | Carnivore | Hall's Cave        | Holocene    | Present Study | collagen | radius         | -16.3 | -16.3 | 7.2  | 2.8  |
| Carnivora | Canidae   | <i>Canis</i>             | <i>sp.</i>                 | 41229 | 2777   | Carnivore | Carnivore | Hall's Cave        | Holocene    | Present Study | collagen | calcaneus      | -15.2 | -15.2 | 9.0  | 2.8  |
| Carnivora | Canidae   | <i>Canis</i>             | <i>sp.</i>                 | 41229 | 6153   | Carnivore | Carnivore | Hall's Cave        | Holocene    | Present Study | collagen | metatarsal 4   | -16.2 | -16.2 | 7.8  | 2.8  |
| Carnivora | Canidae   | <i>Canis</i>             | <i>sp.</i>                 | 41229 | 6562   | Carnivore | Carnivore | Hall's Cave        | Holocene    | Present Study | collagen | metacarpal     | -15.9 | -15.9 | 7.5  | 2.8  |
| Carnivora | Canidae   | <i>Canis</i>             | <i>sp.</i>                 | 41229 | 8326   | Carnivore | Carnivore | Hall's Cave        | Holocene    | Present Study | collagen | n/a            | -12.6 | -12.6 | 8.5  | 2.8  |
| Carnivora | Canidae   | <i>Canis</i>             | <i>sp.</i>                 | 41229 | 9849   | Carnivore | Carnivore | Hall's Cave        | Holocene    | Present Study | collagen | scapular       | -16.4 | -16.4 | 7.7  | 2.7  |
| Carnivora | Canidae   | <i>Canis</i>             | <i>sp.</i>                 | 41229 | 9881   | Carnivore | Carnivore | Hall's Cave        | Holocene    | Present Study | collagen | metacarpal     | -16.2 | -16.2 | 8.1  | 2.7  |
| Carnivora | Canidae   | <i>Canis</i>             | <i>sp.</i>                 | 41229 | 9951   | Carnivore | Carnivore | Hall's Cave        | Holocene    | Present Study | collagen | n/a            | -13.1 | -13.1 | 9.7  | 2.7  |
| Carnivora | Canidae   | <i>Canis</i>             | <i>sp.</i>                 | 41229 | 10278  | Carnivore | Carnivore | Hall's Cave        | Pleistocene | Present Study | collagen | calcaneus      | -16.0 | -16.0 | 9.1  | 2.7  |
| Carnivora | Canidae   | <i>Canis</i>             | <i>sp.</i>                 | 41229 | 10357  | Carnivore | Carnivore | Hall's Cave        | Holocene    | Present Study | collagen | n/a            | -15.0 | -15.0 | 13.4 | 2.8  |
| Carnivora | Canidae   | <i>Canis</i>             | <i>sp.</i>                 | 41229 | 10778  | Carnivore | Carnivore | Hall's Cave        | Holocene    | Present Study | collagen | n/a            | -17.0 | -17.0 | 10.5 | 2.7  |
| Carnivora | Canidae   | <i>Canis</i>             | <i>sp.</i>                 | 41229 | 10876  | Carnivore | Carnivore | Hall's Cave        | Pleistocene | Present Study | collagen | phalanx 1      | -11.8 | -11.8 | 12.3 | 2.8  |
| Carnivora | Canidae   | <i>Canis</i>             | <i>sp.</i>                 | 41229 | 11182  | Carnivore | Carnivore | Hall's Cave        | Pleistocene | Present Study | collagen | n/a            | -18.7 | -18.7 | 5.0  | 2.8  |
| Carnivora | Canidae   | <i>Canis</i>             | <i>sp.</i>                 | 908   | 4311   | Carnivore | Carnivore | Kincaid Shelter    | Holocene    | Present Study | collagen | ischium        | -16.5 | -16.5 | 9.8  | 3.7  |
| Carnivora | Canidae   | <i>Canis</i>             | <i>sp.</i>                 | 908   | 3591   | Carnivore | Carnivore | Kincaid Shelter    | Holocene    | Present Study | collagen | skull          | -15.8 | -15.8 | 10.4 | 3.5  |
| Carnivora | Canidae   | <i>Canis</i>             | <i>sp.</i>                 | 908   | 4300   | Carnivore | Carnivore | Kincaid Shelter    | Holocene    | Present Study | collagen | radius         | bdl   | nd    | bdl  | 12.9 |
| Carnivora | Canidae   | <i>indet.</i>            | <i>sp.</i>                 | 41229 | 9826   | Carnivore | Carnivore | Hall's Cave        | Pleistocene | Present Study | collagen | metacarpal     | -18.8 | -18.8 | 6.8  | 2.7  |
| Carnivora | Canidae   | <i>indet. (juvenile)</i> | <i>sp.</i>                 | 41229 | 719    | Carnivore | Carnivore | Hall's Cave        | Holocene    | Present Study | collagen | n/a            | -19.2 | -19.2 | 8.8  | 2.8  |
| Carnivora | Canidae   | <i>Urocyon</i>           | <i>sp.</i>                 | 40449 | 258    | Carnivore | Carnivore | Levi Rock Shelter  | Holocene    | Present Study | collagen | metacarpal     | bdl   | nd    | bdl  | 2.7  |
| Carnivora | Canidae   | <i>Urocyon or Vulpes</i> | <i>sp.</i>                 | 41229 | 10469  | Carnivore | Carnivore | Hall's Cave        | Pleistocene | Present Study | collagen | dentary        | -15.6 | -15.6 | 9.9  | 2.8  |
| Carnivora | Canidae   | <i>Urocyon or Vulpes</i> | <i>sp.</i>                 | 41229 | 12071  | Carnivore | Carnivore | Hall's Cave        | Pleistocene | Present Study | collagen | n/a            | -16.1 | -16.1 | 10.3 | 2.8  |
| Carnivora | Canidae   | <i>Vulpes</i>            | <i>sp.</i>                 | 41229 | 10867  | Carnivore | Carnivore | Hall's Cave        | Holocene    | Present Study | collagen | dentary        | -14.4 | -14.4 | 11.7 | 2.8  |
| Carnivora | Canidae   | <i>Vulpes</i>            | <i>sp.</i>                 | 1295  | 9      | Carnivore | Carnivore | Clamp Cave         | Pleistocene | Present Study | collagen | dentary        | -23.9 | nd    | 3.2  | 4.4  |
| Carnivora | Canidae   | <i>Vulpes</i>            | <i>sp.</i>                 | 1295  | 2      | Carnivore | Carnivore | Clamp Cave         | Pleistocene | Present Study | collagen | dentary        | bdl   | nd    | bdl  | 6.0  |
| Carnivora | Canidae   | <i>Vulpes</i>            | <i>sp.</i>                 | 1295  | 8      | Carnivore | Carnivore | Clamp Cave         | Pleistocene | Present Study | collagen | dentary        | bdl   | nd    | bdl  | 6.2  |
| Carnivora | Canidae   | <i>Vulpes</i>            | <i>sp.</i>                 | 908   | 3622   | Carnivore | Carnivore | Kincaid Shelter    | Holocene    | Present Study | collagen | una            | bdl   | nd    | bdl  | nd   |
| Carnivora | Felidae   | <i>Felis</i>             | <i>weidii/yagouaroundi</i> | 41229 | 3539   | Carnivore | Carnivore | Hall's Cave        | Pleistocene | Present Study | collagen | n/a            | -18.8 | -18.8 | 12.7 | 2.9  |
| Carnivora | Felidae   | <i>Homotherium</i>       | <i>serum</i>               | 933   | 3387   | Carnivore | Carnivore | Friesenhahn Cave   | Pleistocene | Present Study | collagen | scapula        | -8.5  | -8.5  | 14.3 | 3.2  |
| Carnivora | Felidae   | <i>Homotherium</i>       | <i>serum</i>               | 933   | 2110   | Carnivore | Carnivore | Friesenhahn Cave   | Pleistocene | Present Study | collagen | scapula        | -28.3 | nd    | bdl  | nd   |
| Carnivora | Felidae   | <i>Homotherium</i>       | <i>serum</i>               | 933   | 2297   | Carnivore | Carnivore | Friesenhahn Cave   | Pleistocene | Present Study | collagen | humerus        | -22.0 | nd    | 9.8  | 6.2  |
| Carnivora | Felidae   | <i>Homotherium</i>       | <i>serum</i>               | 933   | 2084   | Carnivore | Carnivore | Friesenhahn Cave   | Pleistocene | Present Study | collagen | fibula         | bdl   | nd    | bdl  | nd   |
| Carnivora | Felidae   | <i>Homotherium</i>       | <i>serum</i>               | 933   | 3934   | Carnivore | Carnivore | Friesenhahn Cave   | Pleistocene | Present Study | collagen | radius         | bdl   | nd    | bdl  | nd   |
| Carnivora | Felidae   | <i>Homotherium</i>       | <i>serum</i>               | 933   | 2149   | Carnivore | Carnivore | Friesenhahn Cave   | Pleistocene | Present Study | collagen | rib            | bdl   | nd    | bdl  | 10.0 |
| Carnivora | Felidae   | <i>Homotherium</i>       | <i>serum</i>               | 933   | 2899   | Carnivore | Carnivore | Friesenhahn Cave   | Pleistocene | Present Study | collagen | scapula        | bdl   | nd    | bdl  | nd   |
| Carnivora | Felidae   | <i>Homotherium</i>       | <i>serum</i>               | 933   | 61     | Carnivore | Carnivore | Friesenhahn Cave   | Pleistocene | Present Study | collagen | incisor root   | -8.8  | -8.8  | 14.3 | 3.2  |
| Carnivora | Felidae   | <i>Homotherium</i>       | <i>serum</i>               | 933   | 2283   | Carnivore | Carnivore | Friesenhahn Cave   | Pleistocene | Present Study | collagen | rib            | -8.9  | -8.9  | 13.8 | 3.0  |
| Carnivora | Felidae</ |                          |                            |       |        |           |           |                    |             |               |          |                |       |       |      |      |



|           |             |                  |                  |       |       |           |           |                   |             |               |          |               |       |       |      |      |
|-----------|-------------|------------------|------------------|-------|-------|-----------|-----------|-------------------|-------------|---------------|----------|---------------|-------|-------|------|------|
| Carnivora | Felidae     | <i>Lynx</i>      | <i>rufus</i>     | 908   | 3931  | Carnivore | Carnivore | Kincaid Shelter   | Holocene    | Present Study | collagen | dentary       | -12.8 | -12.8 | 10.1 | 2.9  |
| Carnivora | Felidae     | <i>Lynx</i>      | <i>rufus</i>     | 908   | 4179  | Carnivore | Carnivore | Kincaid Shelter   | Holocene    | Present Study | collagen | dentary       | -17.6 | -17.6 | 7.9  | 2.8  |
| Carnivora | Felidae     | <i>Lynx</i>      | <i>rufus</i>     | 908   | 4180  | Carnivore | Carnivore | Kincaid Shelter   | Holocene    | Present Study | collagen | dentary       | -16.8 | -16.8 | 8.0  | 2.9  |
| Carnivora | Felidae     | <i>Lynx</i>      | <i>rufus</i>     | 908   | 4181  | Carnivore | Carnivore | Kincaid Shelter   | Holocene    | Present Study | collagen | dentary       | -15.3 | -15.3 | 10.6 | 3.2  |
| Carnivora | Felidae     | <i>Lynx</i>      | <i>rufus</i>     | 908   | 4182  | Carnivore | Carnivore | Kincaid Shelter   | Holocene    | Present Study | collagen | dentary       | -15.1 | -15.1 | 10.1 | 3.2  |
| Carnivora | Felidae     | <i>Lynx</i>      | <i>rufus</i>     | 908   | 4184  | Carnivore | Carnivore | Kincaid Shelter   | Holocene    | Present Study | collagen | dentary       | -16.4 | -16.4 | 8.3  | 2.9  |
| Carnivora | Felidae     | <i>Lynx</i>      | <i>rufus</i>     | 933   | 3916  | Carnivore | Carnivore | Friesenhahn Cave  | Pleistocene | Present Study | collagen | thoracic vert | -15.0 | -15.0 | 8.5  | 2.9  |
| Carnivora | Felidae     | <i>Lynx</i>      | <i>rufus</i>     | 40450 | 584   | Carnivore | Carnivore | ave Without A Nam | Pleistocene | Present Study | collagen | dentary       | -19.5 | -19.5 | 7.4  | 2.9  |
| Carnivora | Felidae     | <i>Lynx</i>      | <i>rufus</i>     | 40450 | 617   | Carnivore | Carnivore | ave Without A Nam | Pleistocene | Present Study | collagen | dentary       | -17.8 | -17.8 | 5.7  | 2.9  |
| Carnivora | Felidae     | <i>Lynx</i>      | <i>rufus</i>     | 40450 | 1604  | Carnivore | Carnivore | ave Without A Nam | Pleistocene | Present Study | collagen | ulna          | -18.1 | -18.1 | 6.2  | 2.9  |
| Carnivora | Felidae     | <i>Lynx</i>      | <i>rufus</i>     | 40450 | 1607  | Carnivore | Carnivore | ave Without A Nam | Pleistocene | Present Study | collagen | maxilla       | -18.2 | -18.2 | 6.3  | 3.0  |
| Carnivora | Felidae     | <i>Lynx</i>      | <i>rufus</i>     | 41229 | 2788  | Carnivore | Carnivore | Hall's Cave       | Holocene    | Present Study | collagen | ectocuneiform | -15.4 | -15.4 | 8.5  | 2.8  |
| Carnivora | Felidae     | <i>Lynx</i>      | <i>rufus</i>     | 41229 | 6356  | Carnivore | Carnivore | Hall's Cave       | Holocene    | Present Study | collagen | dentary       | -15.7 | -15.7 | 9.2  | 2.8  |
| Carnivora | Felidae     | <i>Lynx</i>      | <i>rufus</i>     | 908   | 3476  | Carnivore | Carnivore | Kincaid Shelter   | Holocene    | Present Study | collagen | dentary       | -17.4 | nd    | 10.0 | 4.8  |
| Carnivora | Felidae     | <i>Lynx</i>      | <i>rufus</i>     | 40449 | 101   | Carnivore | Carnivore | Levi Rock Shelter | Holocene    | Present Study | collagen | dentary       | bdl   | nd    | bdl  | nd   |
| Carnivora | Felidae     | <i>Panthera</i>  | <i>leo atrox</i> | 908   | 2418  | Carnivore | Carnivore | Kincaid Shelter   | Pleistocene | Present Study | enamel   | canine        | -4.5  | -8.9  | NA   | 0.4  |
| Carnivora | Felidae     | <i>Panthera</i>  | <i>leo atrox</i> | 30967 | 1613  | Carnivore | Carnivore | Ingleside         | Pleistocene | Present Study | enamel   | canine        | -8.3  | -12.7 | NA   | 29.3 |
| Carnivora | Felidae     | <i>Panthera</i>  | <i>onca</i>      | 41229 | 900   | Carnivore | Carnivore | Hall's Cave       | Holocene    | Present Study | collagen | n/a           | -10.3 | -10.3 | 13.6 | 2.8  |
| Carnivora | Felidae     | <i>Panthera</i>  | <i>onca</i>      | 41229 | 3537  | Carnivore | Carnivore | Hall's Cave       | Pleistocene | Present Study | collagen | metatarsal 4  | -14.0 | -14.0 | 12.7 | 2.9  |
| Carnivora | Felidae     | <i>Panthera</i>  | <i>onca</i>      | 41229 | 10797 | Carnivore | Carnivore | Hall's Cave       | Holocene    | Present Study | collagen | thoracic vert | -10.3 | -10.3 | 12.8 | 2.9  |
| Carnivora | Felidae     | <i>Panthera</i>  | <i>onca</i>      | 41229 | 10799 | Carnivore | Carnivore | Hall's Cave       | Holocene    | Present Study | collagen | rib           | -10.1 | -10.1 | 13.0 | 2.9  |
| Carnivora | Felidae     | <i>Panthera</i>  | <i>onca</i>      | 41229 | 10866 | Carnivore | Carnivore | Hall's Cave       | Pleistocene | Present Study | collagen | phalanx 2     | -17.7 | -17.7 | 12.5 | 2.8  |
| Carnivora | Felidae     | <i>Panthera</i>  | <i>onca</i>      | 41229 | 10875 | Carnivore | Carnivore | Hall's Cave       | Pleistocene | Present Study | collagen | metacarpal    | -14.2 | -14.2 | 11.1 | 2.8  |
| Carnivora | Felidae     | <i>Panthera</i>  | <i>onca</i>      | 41229 | 10905 | Carnivore | Carnivore | Hall's Cave       | Holocene    | Present Study | collagen | metacarpal 1  | -10.7 | -10.7 | 13.1 | 2.9  |
| Carnivora | Felidae     | <i>Panthera</i>  | <i>onca</i>      | 43407 | 31    | Carnivore | Carnivore | Honey Creek Cave  | Pleistocene | Present Study | enamel   | molar 1       | -12.0 | -16.5 | NA   | 27.3 |
| Carnivora | Felidae     | <i>Panthera</i>  | <i>onca</i>      | 40673 | 52    | Carnivore | Carnivore | Laubach 1         | Pleistocene | Present Study | collagen | occipital     | bdl   | nd    | bdl  | nd   |
| Carnivora | Felidae     | <i>Puma</i>      | <i>concolor</i>  | 908   | 2181  | Carnivore | Carnivore | Kincaid Shelter   | Holocene    | Present Study | collagen | metacarpal 1  | -18.2 | -18.2 | 8.2  | 2.8  |
| Carnivora | Felidae     | <i>Puma</i>      | <i>concolor</i>  | 908   | 2254  | Carnivore | Carnivore | Kincaid Shelter   | Holocene    | Present Study | collagen | metatarsal 5  | -20.6 | -20.6 | 7.2  | 3.2  |
| Carnivora | Felidae     | <i>Puma</i>      | <i>concolor</i>  | 41229 | 10800 | Carnivore | Carnivore | Hall's Cave       | Holocene    | Present Study | collagen | thoracic vert | -11.1 | -11.1 | 10.8 | 2.9  |
| Carnivora | Felidae     | <i>Puma</i>      | <i>concolor</i>  | 41229 | 11704 | Carnivore | Carnivore | Hall's Cave       | Holocene    | Present Study | collagen | dentary       | -13.0 | -13.0 | 10.7 | 2.8  |
| Carnivora | Felidae     | <i>Puma</i>      | <i>concolor</i>  | 41229 | 15780 | Carnivore | Carnivore | Hall's Cave       | Holocene    | Present Study | collagen | dentary       | -16.7 | -16.7 | 8.6  | 2.9  |
| Carnivora | Felidae     | <i>Puma</i>      | <i>concolor</i>  | 40449 | 149   | Carnivore | Carnivore | Levi Rock Shelter | Holocene    | Present Study | collagen | bone          | bdl   | nd    | bdl  | 27.0 |
| Carnivora | Felidae     | <i>Smilodon</i>  | <i>fatalis</i>   | 933   | 2688  | Carnivore | Carnivore | Friesenhahn Cave  | Pleistocene | Present Study | enamel   | canine        | -4.0  | -8.4  | NA   | -3.2 |
| Carnivora | Felidae     | <i>Smilodon</i>  | <i>fatalis</i>   | 933   | 2690  | Carnivore | Carnivore | Friesenhahn Cave  | Pleistocene | Present Study | enamel   | premolar 4    | -2.4  | -6.8  | NA   | 30.2 |
| Carnivora | Felidae     | <i>Smilodon</i>  | <i>fatalis</i>   | 933   | 3956  | Carnivore | Carnivore | Friesenhahn Cave  | Pleistocene | Present Study | enamel   | premolar 4    | -10.0 | -14.4 | NA   | 27.1 |
| Carnivora | Felidae     | <i>Smilodon</i>  | <i>fatalis</i>   | 933   | 5704  | Carnivore | Carnivore | Friesenhahn Cave  | Pleistocene | Present Study | collagen | humerus       | -8.8  | -8.8  | 13.5 | 3.1  |
| Carnivora | Felidae     | <i>Smilodon</i>  | <i>fatalis</i>   | 30967 | 1034  | Carnivore | Carnivore | Ingleside         | Pleistocene | Present Study | enamel   | canine        | -5.8  | -10.2 | NA   | -3.3 |
| Carnivora | Felidae     | <i>Smilodon</i>  | <i>fatalis</i>   | 933   | 2691  | Carnivore | Carnivore | Friesenhahn Cave  | Pleistocene | Present Study | collagen | premolar 4 r  | -27.6 | nd    | bdl  | nd   |
| Carnivora | Felidae     | <i>Smilodon</i>  | <i>fatalis</i>   | 933   | 3955  | Carnivore | Carnivore | Friesenhahn Cave  | Pleistocene | Present Study | collagen | astragalus    | -18.6 | -18.6 | 11.5 | 3.7  |
| Carnivora | Felidae     | <i>Smilodon</i>  | <i>fatalis</i>   | 933   | 2206  | Carnivore | Carnivore | Friesenhahn Cave  | Pleistocene | Present Study | collagen | humerus       | bdl   | nd    | bdl  | nd   |
| Carnivora | Felidae     | <i>Smilodon</i>  | <i>fatalis</i>   | 933   | 2506  | Carnivore | Carnivore | Friesenhahn Cave  | Pleistocene | Present Study | collagen | humerus       | bdl   | nd    | bdl  | nd   |
| Carnivora | Felidae     | <i>Smilodon</i>  | <i>fatalis</i>   | 933   | 3339  | Carnivore | Carnivore | Friesenhahn Cave  | Pleistocene | Present Study | collagen | humerus       | bdl   | nd    | bdl  | nd   |
| Carnivora | Felidae     | <i>Smilodon</i>  | <i>fatalis</i>   | 933   | 2690  | Carnivore | Carnivore | Friesenhahn Cave  | Pleistocene | Present Study | collagen | premolar 4 r  | bdl   | nd    | bdl  | nd   |
| Carnivora | Felidae     | <i>Smilodon</i>  | <i>fatalis</i>   | 933   | 898   | Carnivore | Carnivore | Friesenhahn Cave  | Pleistocene | Present Study | collagen | premolar root | bdl   | nd    | bdl  | nd   |
| Carnivora | Mephitidae  | <i>Mephitis</i>  | <i>mephitis</i>  | 908   | 858   | Carnivore | Carnivore | Kincaid Shelter   | Holocene    | Present Study | collagen | dentary       | -17.2 | -17.2 | 11.0 | 3.0  |
| Carnivora | Mephitidae  | <i>Mephitis</i>  | <i>mephitis</i>  | 908   | 989   | Carnivore | Carnivore | Kincaid Shelter   | Holocene    | Present Study | collagen | dentary       | -12.6 | -12.6 | 9.3  | 2.9  |
| Carnivora | Mephitidae  | <i>Mephitis</i>  | <i>mephitis</i>  | 908   | 1204  | Carnivore | Carnivore | Kincaid Shelter   | Holocene    | Present Study | collagen | dentary       | -15.7 | -15.7 | 10.0 | 2.9  |
| Carnivora | Mephitidae  | <i>Mephitis</i>  | <i>mephitis</i>  | 908   | 3264  | Carnivore | Carnivore | Kincaid Shelter   | Holocene    | Present Study | collagen | humerus       | -15.2 | -15.2 | 9.3  | 2.9  |
| Carnivora | Mephitidae  | <i>Mephitis</i>  | <i>mephitis</i>  | 908   | 4253  | Carnivore | Carnivore | Kincaid Shelter   | Holocene    | Present Study | collagen | humerus       | -16.5 | -16.5 | 7.5  | 2.9  |
| Carnivora | Mephitidae  | <i>Mephitis</i>  | <i>mephitis</i>  | 908   | 4257  | Carnivore | Carnivore | Kincaid Shelter   | Holocene    | Present Study | collagen | skull         | -13.9 | -13.9 | 7.1  | 2.9  |
| Carnivora | Mephitidae  | <i>Mephitis</i>  | <i>mephitis</i>  | 933   | 4494  | Carnivore | Carnivore | Friesenhahn Cave  | Pleistocene | Present Study | collagen | dentary       | -15.6 | -15.6 | 7.5  | 3.2  |
| Carnivora | Mephitidae  | <i>Mephitis</i>  | <i>mephitis</i>  | 41229 | 3736  | Carnivore | Carnivore | Hall's Cave       | Pleistocene | Present Study | collagen | bone          | -16.4 | -16.4 | 7.6  | 2.9  |
| Carnivora | Mephitidae  | <i>Mephitis</i>  | <i>mephitis</i>  | 41229 | 10602 | Carnivore | Carnivore | Hall's Cave       | Pleistocene | Present Study | collagen | dentary       | -14.3 | -14.3 | 13.2 | 2.9  |
| Carnivora | Mephitidae  | <i>Mephitis</i>  | <i>mephitis</i>  | 41229 | 11219 | Carnivore | Carnivore | Hall's Cave       | Pleistocene | Present Study | collagen | dentary       | -15.1 | -15.1 | 9.9  | 2.9  |
| Carnivora | Mephitidae  | <i>Mephitis</i>  | <i>mephitis</i>  | 41229 | 19885 | Carnivore | Carnivore | Hall's Cave       | Holocene    | Present Study | collagen | dentary       | -12.9 | -12.9 | 12.1 | 2.9  |
| Carnivora | Mephitidae  | <i>Spilogale</i> | <i>sp.</i>       | 41229 | 1021  | Carnivore | Carnivore | Hall's Cave       | Pleistocene | Present Study | collagen | dentary       | -18.0 | -18.0 | 11.4 | 2.9  |
| Carnivora | Mephitidae  | <i>Spilogale</i> | <i>sp.</i>       | 41229 | 1442  | Carnivore | Carnivore | Hall's Cave       | Pleistocene | Present Study | collagen | dentary       | -18.3 | -18.3 | 7.3  | 3.0  |
| Carnivora | Mephitidae  | <i>Spilogale</i> | <i>sp.</i>       | 41229 | 1782  | Carnivore | Carnivore | Hall's Cave       | Pleistocene | Present Study | collagen | humerus       | -16.3 | -16.3 | 10.3 | 2.8  |
| Carnivora | Mephitidae  | <i>Spilogale</i> | <i>sp.</i>       | 41229 | 1783  | Carnivore | Carnivore | Hall's Cave       | Pleistocene | Present Study | collagen | bone          | -18.0 | -18.0 | 10.8 | 2.9  |
| Carnivora | Mephitidae  | <i>Spilogale</i> | <i>sp.</i>       | 41229 | 3455  | Carnivore | Carnivore | Hall's Cave       | Pleistocene | Present Study | collagen | dentary       | -19.4 | -19.4 | 7.5  | 2.9  |
| Carnivora | Mephitidae  | <i>Spilogale</i> | <i>sp.</i>       | 41229 | 3744  | Carnivore | Carnivore | Hall's Cave       | Pleistocene | Present Study | collagen | dentary       | -16.0 | -16.0 | 12.5 | 2.8  |
| Carnivora | Mephitidae  | <i>Spilogale</i> | <i>sp.</i>       | 41229 | 11197 | Carnivore | Carnivore | Hall's Cave       | Pleistocene | Present Study | collagen | maxilla       | -17.2 | -17.2 | 8.8  | 3.0  |
| Carnivora | Mephitidae  | <i>Spilogale</i> | <i>sp.</i>       | 41229 | 11220 | Carnivore | Carnivore | Hall's Cave       | Pleistocene | Present Study | collagen | bone          | -17.5 | -17.5 | 10.2 | 2.8  |
| Carnivora | Mephitidae  | <i>Spilogale</i> | <i>sp.</i>       | 41229 | 19884 | Carnivore | Carnivore | Hall's Cave       | Holocene    | Present Study | collagen | canine root   | -17.2 | -17.2 | 7.9  | 2.9  |
| Carnivora | Mephitidae  | <i>Spilogale</i> | <i>sp.</i>       | 41229 | 19886 | Carnivore | Carnivore | Hall's Cave       | Holocene    | Present Study | collagen | dentary       | -16.1 | -16.1 | 12.2 | 2.8  |
| Carnivora | Mephitidae  | <i>Spilogale</i> | <i>sp.</i>       | 41229 | 19887 | Carnivore | Carnivore | Hall's Cave       | Pleistocene | Present Study | collagen | dentary       | -17.0 | -17.0 | 10.7 | 2.8  |
| Carnivora | Mephitidae  | <i>Spilogale</i> | <i>sp.</i>       | 41229 | 19888 | Carnivore | Carnivore | Hall's Cave       | Holocene    | Present Study | collagen | dentary       | -15.7 | -15.7 | 12.6 | 2.8  |
| Carnivora | Mephitidae  | <i>Spilogale</i> | <i>sp.</i>       | 41229 | 19890 | Carnivore | Carnivore | Hall's Cave       | Holocene    | Present Study | collagen | dentary       | -18.7 | -18.7 | 11.3 | 2.9  |
| Carnivora | Mephitidae  | <i>Spilogale</i> | <i>sp.</i>       | 41229 | 1365  | Carnivore | Carnivore | Hall's Cave       | Pleistocene | Present Study | collagen | dentary       | -15.9 | -15.9 | 9.8  | 2.9  |
| Carnivora | Mustelidae  | <i>indet.</i>    | <i>sp.</i>       | 41229 | 15778 | Carnivore | Carnivore | Hall's Cave       | Holocene    | Present Study | collagen | dentary       | -17.0 | -17.0 | 11.9 | 3.1  |
| Carnivora | Mustelidae  | <i>indet.</i>    | <i>sp.</i>       | 41229 | 15779 | Carnivore | Carnivore | Hall's Cave       | Holocene    | Present Study | collagen | dentary       | -17.6 | -17.6 | 10.3 | 2.7  |
| Carnivora | Mustelidae  | <i>Mustela</i>   | <i>sp.</i>       | 41229 | 10262 | Carnivore | Carnivore | Hall's Cave       | Pleistocene | Present Study | collagen | n/a           | -16.1 | -16.1 | 12.6 | 2.8  |
| Carnivora | Mustelidae  | <i>Taxidea</i>   | <i>taxus</i>     | 908   | 593   | Carnivore | Carnivore | Kincaid Shelter   | Holocene    | Present Study | collagen | dentary       | -13.0 | -13.0 | 9.8  | 2.8  |
| Carnivora | Mustelidae  | <i>Taxidea</i>   | <i>taxus</i>     | 908   | 3278  | Carnivore | Carnivore | Kincaid Shelter   | Holocene    | Present Study | collagen | ulna          | -17.0 | -17.0 | 9.0  | 2.9  |
| Carnivora | Mustelidae  | <i>Taxidea</i>   | <i>taxus</i>     | 908   | 3337  | Carnivore | Carnivore | Kincaid Shelter   | Holocene    | Present Study | collagen | scapula       | -15.8 | -15.8 | 9.1  | 2.9  |
| Carnivora | Mustelidae  | <i>Taxidea</i>   | <i>taxus</i>     | 908   | 3898  | Carnivore | Carnivore | Kincaid Shelter   | Holocene    | Present Study | collagen | ulna          | -10.9 | -10.9 | 11.7 | 3.0  |
| Carnivora | Mustelidae  | <i>Taxidea</i>   | <i>taxus</i>     | 908   | 3899  | Carnivore | Carnivore | Kincaid Shelter   | Holocene    | Present Study | collagen | dentary       | -15.2 | -15.2 | 11.9 | 2.9  |
| Carnivora | Mustelidae  | <i>Taxidea</i>   | <i>taxus</i>     | 908   | 3901  | Carnivore | Carnivore | Kincaid Shelter   | Holocene    | Present Study | collagen | maxilla       | -15.4 | -15.4 | 9.4  | 2.8  |
| Carnivora | Mustelidae  | <i>Taxidea</i>   | <i>taxus</i>     | 908   | 3917  | Carnivore | Carnivore | Kincaid Shelter   | Holocene    | Present Study | collagen | dentary       | -15.9 | -15.9 | 12.8 | 3.1  |
| Carnivora | Mustelidae  | <i>Taxidea</i>   | <i>taxus</i>     | 908   | 3918  | Carnivore | Carnivore | Kincaid Shelter   | Holocene    | Present Study | collagen | dentary       | -15.6 | -15.6 | 10.5 | 2.8  |
| Carnivora | Procyonidae | <i>Procyon</i>   | <i>lotor</i>     | 908   | 2442  | Carnivore | Carnivore | Kincaid Shelter   | Pleistocene | Present Study | collagen | maxilla       | -18.4 | -18.4 | 9.2  | 3.1  |
| Carnivora | Procyonidae | <i>Procyon</i>   | <i>lotor</i>     | 908   | 3940  | Carnivore | Carnivore | Kincaid Shelter   | Holocene    | Present Study | collagen | dentary       | -15.5 | -15.5 | 12.7 | 3.2  |
| Carnivora | Procyonidae | <i>Procyon</i>   | <i>lotor</i>     | 908   | 4344  | Carnivore | Carnivore | Kincaid Shelter   | Holocene    | Present Study | collagen | radius        | -17.1 | -17.1 | 9.8  | 3.1  |
| Carnivora | Procyonidae | <i>Procyon</i>   | <i>lotor</i>     | 41229 | 1345  | Carnivore | Carnivore | Hall's Cave       | Holocene    | Present Study | collagen | femur         | -16.4 | -16.4 | 10.6 |      |

|            |             |                 |                   |              |       |           |              |                    |             |               |          |               |       |       |      |      |      |
|------------|-------------|-----------------|-------------------|--------------|-------|-----------|--------------|--------------------|-------------|---------------|----------|---------------|-------|-------|------|------|------|
| Carnivora  | Procyonidae | <i>Procyon</i>  | <i>lotor</i>      | 43133        | 245   | Carnivore | Carnivore    | Bering Sinkhole    | Holocene    | Present Study | collagen | dentary       | -13.7 | -13.7 | 9.8  | 3.2  |      |
| Carnivora  | Procyonidae | <i>Procyon</i>  | <i>lotor</i>      | 908          | 4348  | Carnivore | Carnivore    | Kincaid Shelter    | Holocene    | Present Study | collagen | maxilla       | -21.3 | -21.3 | 6.7  | 3.9  |      |
| Carnivora  | Procyonidae | <i>Procyon</i>  | <i>lotor</i>      | 908          | 1164  | Carnivore | Carnivore    | Kincaid Shelter    | Holocene    | Present Study | collagen | ulna          | -18.2 | -18.2 | 8.1  | 3.8  |      |
| Carnivora  | Ursidae     | <i>Arctodus</i> | <i>simus</i>      | 933          | 2963  | Carnivore | Carnivore    | Friesenhahn Cave   | Pleistocene | Present Study | collagen | molar 3 root  | -16.5 | -16.5 | 9.7  | 3.3  |      |
| Carnivora  | Ursidae     | <i>Arctodus</i> | <i>simus</i>      | 933          | 2156  | Carnivore | Carnivore    | Friesenhahn Cave   | Pleistocene | Present Study | collagen | molar root    | -17.3 | -17.3 | 7.6  | 3.5  |      |
| Carnivora  | Ursidae     | <i>Ursus</i>    | <i>americanus</i> | 41229        | 2729  | Carnivore | Carnivore    | Hall's Cave        | Holocene    | Present Study | collagen | atlas vertebr | -18.9 | -18.9 | 5.4  | 3.0  |      |
| Carnivora  | Ursidae     | <i>Ursus</i>    | <i>americanus</i> | 41229        | 2731  | Carnivore | Carnivore    | Hall's Cave        | Pleistocene | Present Study | collagen | ectocuneifor  | -17.8 | -17.8 | 5.1  | 2.7  |      |
| Carnivora  | Ursidae     | <i>Ursus</i>    | <i>americanus</i> | 41229        | 11029 | Carnivore | Carnivore    | Hall's Cave        | Holocene    | Present Study | collagen | phalanx 2     | -19.5 | -19.5 | 3.7  | 3.1  |      |
| Carnivora  | Ursidae     | <i>Ursus</i>    | <i>americanus</i> | 41229        | 11754 | Carnivore | Carnivore    | Hall's Cave        | Pleistocene | Present Study | collagen | phalanx 1     | -18.7 | -18.7 | 3.7  | 2.7  |      |
| Carnivora  | Ursidae     | <i>Ursus</i>    | <i>americanus</i> | 43365        | 1     | Carnivore | Carnivore    | Sanders Ranch Cave | Pleistocene | Present Study | collagen | skull         | -20.1 | -20.1 | 4.3  | 2.9  |      |
| Carnivora  | Ursidae     | <i>Ursus</i>    | <i>americanus</i> | 933          | 3499  | Carnivore | Carnivore    | Friesenhahn Cave   | Pleistocene | Present Study | collagen | scapula       | -6.1  | nd    | bdl  | nd   |      |
| Carnivora  | Ursidae     | <i>Ursus</i>    | <i>americanus</i> | 933          | 2544  | Carnivore | Carnivore    | Friesenhahn Cave   | Pleistocene | Present Study | collagen | n/a           | bdl   | nd    | bdl  | nd   |      |
| Carnivora  | Ursidae     | <i>Ursus</i>    | <i>americanus</i> | 41284        | 16    | Carnivore | Carnivore    | Don Williams Cave  | Holocene    | Present Study | collagen | dentary       | -18.5 | -18.5 | 6.3  | 3.0  |      |
| Carnivora  | Ursidae     | <i>Ursus</i>    | <i>americanus</i> | 41284        | 186   | Carnivore | Carnivore    | Don Williams Cave  | Holocene    | Present Study | collagen | rib           | -18.5 | -18.5 | 6.0  | 2.9  |      |
| Carnivora  | Ursidae     | <i>Ursus</i>    | <i>americanus</i> | 43133        | 1132  | Carnivore | Carnivore    | Bering Sinkhole    | Holocene    | Present Study | collagen | dentary       | -17.0 | -17.0 | 6.5  | 2.9  |      |
| Carnivora  | Ursidae     | <i>Ursus</i>    | <i>americanus</i> | 43539        | 1     | Carnivore | Carnivore    | Cicurina Cave      | Holocene    | Present Study | collagen | skull         | -17.0 | -17.0 | 6.5  | 2.8  |      |
| Carnivora  | Ursidae     | <i>Ursus</i>    | <i>americanus</i> | Schulze Cave | 7380  | Carnivore | Carnivore    | Schulze Cave       | Pleistocene | Present Study | collagen | skull         | -17.7 | -17.7 | 8.7  | 3.0  |      |
| Carnivora  | Ursidae     | <i>Ursus</i>    | <i>americanus</i> | 1295         | 23    | Carnivore | Carnivore    | Clamp Cave         | Pleistocene | Present Study | enamel   | canine        | -11.1 | -15.6 | na   | 30.1 | -0.7 |
| Carnivora  | Ursidae     | <i>Ursus</i>    | <i>americanus</i> | Schulze Cave | 7188  | Carnivore | Carnivore    | Schulze Cave       | Pleistocene | Present Study | collagen | n/a           | -19.6 | -19.6 | 7.1  | 3.0  |      |
| Lagomorpha | Leporidae   | <i>Lepus</i>    | <i>sp.</i>        | 40449        | 26    | Herbivore | Non-ruminant | Levi Rock Shelter  | Holocene    | Present Study | collagen | humerus       | -23.3 | -23.3 | 2.4  | 2.7  |      |
| Lagomorpha | Leporidae   | <i>Lepus</i>    | <i>sp.</i>        | 40450        | 115   | Herbivore | Non-ruminant | ave Without A Narr | Pleistocene | Present Study | collagen | dentary       | -19.5 | -19.5 | 4.0  | 3.0  |      |
| Lagomorpha | Leporidae   | <i>Lepus</i>    | <i>sp.</i>        | 40450        | 200   | Herbivore | Non-ruminant | ave Without A Narr | Pleistocene | Present Study | collagen | dentary       | -19.8 | -19.8 | 2.7  | 3.1  |      |
| Lagomorpha | Leporidae   | <i>Lepus</i>    | <i>sp.</i>        | 40450        | 264   | Herbivore | Non-ruminant | ave Without A Narr | Pleistocene | Present Study | collagen | dentary       | -19.9 | -19.9 | 3.3  | 3.3  |      |
| Lagomorpha | Leporidae   | <i>Lepus</i>    | <i>sp.</i>        | 40450        | 268   | Herbivore | Non-ruminant | ave Without A Narr | Pleistocene | Present Study | collagen | dentary       | -19.4 | -19.4 | 3.3  | 3.1  |      |
| Lagomorpha | Leporidae   | <i>Lepus</i>    | <i>sp.</i>        | 40450        | 684   | Herbivore | Non-ruminant | ave Without A Narr | Pleistocene | Present Study | collagen | dentary       | -18.4 | -18.4 | 3.6  | 2.9  |      |
| Lagomorpha | Leporidae   | <i>Lepus</i>    | <i>sp.</i>        | 40450        | 685   | Herbivore | Non-ruminant | ave Without A Narr | Pleistocene | Present Study | collagen | dentary       | -20.0 | -20.0 | 3.3  | 3.0  |      |
| Lagomorpha | Leporidae   | <i>Lepus</i>    | <i>sp.</i>        | 40450        | 687   | Herbivore | Non-ruminant | ave Without A Narr | Pleistocene | Present Study | collagen | dentary       | -18.8 | -18.8 | 4.1  | 3.2  |      |
| Lagomorpha | Leporidae   | <i>Lepus</i>    | <i>sp.</i>        | 40450        | 690   | Herbivore | Non-ruminant | ave Without A Narr | Pleistocene | Present Study | collagen | dentary       | -19.7 | -19.7 | 2.2  | 3.1  |      |
| Lagomorpha | Leporidae   | <i>Lepus</i>    | <i>sp.</i>        | 40450        | 1025  | Herbivore | Non-ruminant | ave Without A Narr | Pleistocene | Present Study | collagen | dentary       | -21.4 | -21.4 | 3.2  | 2.9  |      |
| Lagomorpha | Leporidae   | <i>Lepus</i>    | <i>sp.</i>        | 40450        | 1034  | Herbivore | Non-ruminant | ave Without A Narr | Pleistocene | Present Study | collagen | dentary       | -20.9 | -20.9 | 2.7  | 3.0  |      |
| Lagomorpha | Leporidae   | <i>Lepus</i>    | <i>sp.</i>        | 40450        | 1622  | Herbivore | Non-ruminant | ave Without A Narr | Pleistocene | Present Study | collagen | dentary       | -18.2 | -18.2 | 2.9  | 2.9  |      |
| Lagomorpha | Leporidae   | <i>Lepus</i>    | <i>sp.</i>        | 41229        | 57    | Herbivore | Non-ruminant | Hall's Cave        | Holocene    | Present Study | collagen | dentary       | -17.7 | -17.7 | 5.2  | 2.9  |      |
| Lagomorpha | Leporidae   | <i>Lepus</i>    | <i>sp.</i>        | 41229        | 72    | Herbivore | Non-ruminant | Hall's Cave        | Holocene    | Present Study | collagen | dentary       | -14.9 | -14.9 | 3.9  | 3.0  |      |
| Lagomorpha | Leporidae   | <i>Lepus</i>    | <i>sp.</i>        | 41229        | 224   | Herbivore | Non-ruminant | Hall's Cave        | Holocene    | Present Study | collagen | dentary       | -16.7 | -16.7 | 5.2  | 2.9  |      |
| Lagomorpha | Leporidae   | <i>Lepus</i>    | <i>sp.</i>        | 41229        | 225   | Herbivore | Non-ruminant | Hall's Cave        | Holocene    | Present Study | collagen | dentary       | -15.4 | -15.4 | 7.3  | 2.8  |      |
| Lagomorpha | Leporidae   | <i>Lepus</i>    | <i>sp.</i>        | 41229        | 305   | Herbivore | Non-ruminant | Hall's Cave        | Holocene    | Present Study | collagen | dentary       | -19.1 | -19.1 | 6.9  | 3.2  |      |
| Lagomorpha | Leporidae   | <i>Lepus</i>    | <i>sp.</i>        | 41229        | 306   | Herbivore | Non-ruminant | Hall's Cave        | Holocene    | Present Study | collagen | dentary       | -19.4 | -19.4 | 4.1  | 3.0  |      |
| Lagomorpha | Leporidae   | <i>Lepus</i>    | <i>sp.</i>        | 41229        | 352   | Herbivore | Non-ruminant | Hall's Cave        | Pleistocene | Present Study | collagen | dentary       | -11.8 | -11.8 | 10.6 | 2.8  |      |
| Lagomorpha | Leporidae   | <i>Lepus</i>    | <i>sp.</i>        | 41229        | 411   | Herbivore | Non-ruminant | Hall's Cave        | Pleistocene | Present Study | collagen | dentary       | -16.9 | -16.9 | 7.6  | 2.9  |      |
| Lagomorpha | Leporidae   | <i>Lepus</i>    | <i>sp.</i>        | 41229        | 694   | Herbivore | Non-ruminant | Hall's Cave        | Holocene    | Present Study | collagen | dentary       | -13.6 | -13.6 | 5.4  | 2.8  |      |
| Lagomorpha | Leporidae   | <i>Lepus</i>    | <i>sp.</i>        | 41229        | 710   | Herbivore | Non-ruminant | Hall's Cave        | Holocene    | Present Study | collagen | dentary       | -13.8 | -13.8 | 4.9  | 2.9  |      |
| Lagomorpha | Leporidae   | <i>Lepus</i>    | <i>sp.</i>        | 41229        | 722   | Herbivore | Non-ruminant | Hall's Cave        | Holocene    | Present Study | collagen | humerus       | -14.7 | -14.7 | 6.2  | 2.8  |      |
| Lagomorpha | Leporidae   | <i>Lepus</i>    | <i>sp.</i>        | 41229        | 743   | Herbivore | Non-ruminant | Hall's Cave        | Pleistocene | Present Study | collagen | vertebra      | -14.7 | -14.7 | 8.0  | 2.8  |      |
| Lagomorpha | Leporidae   | <i>Lepus</i>    | <i>sp.</i>        | 41229        | 744   | Herbivore | Non-ruminant | Hall's Cave        | Pleistocene | Present Study | collagen | skull         | -17.8 | -17.8 | 6.7  | 2.9  |      |
| Lagomorpha | Leporidae   | <i>Lepus</i>    | <i>sp.</i>        | 41229        | 883   | Herbivore | Non-ruminant | Hall's Cave        | Holocene    | Present Study | collagen | dentary       | -16.3 | -16.3 | 7.9  | 3.0  |      |
| Lagomorpha | Leporidae   | <i>Lepus</i>    | <i>sp.</i>        | 41229        | 885   | Herbivore | Non-ruminant | Hall's Cave        | Holocene    | Present Study | collagen | humerus       | -18.7 | -18.7 | 5.0  | 2.8  |      |
| Lagomorpha | Leporidae   | <i>Lepus</i>    | <i>sp.</i>        | 41229        | 894   | Herbivore | Non-ruminant | Hall's Cave        | Holocene    | Present Study | collagen | dentary       | -22.1 | -22.1 | 5.2  | 3.0  |      |
| Lagomorpha | Leporidae   | <i>Lepus</i>    | <i>sp.</i>        | 41229        | 931   | Herbivore | Non-ruminant | Hall's Cave        | Holocene    | Present Study | collagen | maxilla       | -14.2 | -14.2 | 7.1  | 2.9  |      |
| Lagomorpha | Leporidae   | <i>Lepus</i>    | <i>sp.</i>        | 41229        | 970   | Herbivore | Non-ruminant | Hall's Cave        | Holocene    | Present Study | collagen | humerus       | -14.7 | -14.7 | 4.2  | 2.8  |      |
| Lagomorpha | Leporidae   | <i>Lepus</i>    | <i>sp.</i>        | 41229        | 986   | Herbivore | Non-ruminant | Hall's Cave        | Pleistocene | Present Study | collagen | skull         | -14.9 | -14.9 | 7.5  | 2.9  |      |
| Lagomorpha | Leporidae   | <i>Lepus</i>    | <i>sp.</i>        | 41229        | 999   | Herbivore | Non-ruminant | Hall's Cave        | Holocene    | Present Study | collagen | skull         | -17.0 | -17.0 | 4.7  | 2.9  |      |
| Lagomorpha | Leporidae   | <i>Lepus</i>    | <i>sp.</i>        | 41229        | 1145  | Herbivore | Non-ruminant | Hall's Cave        | Holocene    | Present Study | collagen | dentary       | -19.4 | -19.4 | 5.4  | 3.3  |      |
| Lagomorpha | Leporidae   | <i>Lepus</i>    | <i>sp.</i>        | 41229        | 1148  | Herbivore | Non-ruminant | Hall's Cave        | Holocene    | Present Study | collagen | dentary       | -11.5 | -11.5 | 7.0  | 2.9  |      |
| Lagomorpha | Leporidae   | <i>Lepus</i>    | <i>sp.</i>        | 41229        | 1286  | Herbivore | Non-ruminant | Hall's Cave        | Holocene    | Present Study | collagen | ulna          | -15.6 | -15.6 | 6.1  | 2.8  |      |
| Lagomorpha | Leporidae   | <i>Lepus</i>    | <i>sp.</i>        | 41229        | 1290  | Herbivore | Non-ruminant | Hall's Cave        | Holocene    | Present Study | collagen | ulna          | -12.9 | -12.9 | 4.6  | 2.7  |      |
| Lagomorpha | Leporidae   | <i>Lepus</i>    | <i>sp.</i>        | 41229        | 1305  | Herbivore | Non-ruminant | Hall's Cave        | Holocene    | Present Study | collagen | dentary       | -19.9 | -19.9 | 3.8  | 3.1  |      |
| Lagomorpha | Leporidae   | <i>Lepus</i>    | <i>sp.</i>        | 41229        | 1600  | Herbivore | Non-ruminant | Hall's Cave        | Holocene    | Present Study | collagen | skull         | -14.9 | -14.9 | 4.2  | 2.8  |      |
| Lagomorpha | Leporidae   | <i>Lepus</i>    | <i>sp.</i>        | 41229        | 1727  | Herbivore | Non-ruminant | Hall's Cave        | Holocene    | Present Study | collagen | humerus       | -11.0 | -11.0 | 4.7  | 2.7  |      |
| Lagomorpha | Leporidae   | <i>Lepus</i>    | <i>sp.</i>        | 41229        | 1728  | Herbivore | Non-ruminant | Hall's Cave        | Holocene    | Present Study | collagen | humerus       | -20.7 | -20.7 | 5.0  | 2.9  |      |
| Lagomorpha | Leporidae   | <i>Lepus</i>    | <i>sp.</i>        | 41229        | 1822  | Herbivore | Non-ruminant | Hall's Cave        | Holocene    | Present Study | collagen | calcaneus     | -22.0 | -22.0 | 4.3  | 2.8  |      |
| Lagomorpha | Leporidae   | <i>Lepus</i>    | <i>sp.</i>        | 41229        | 1823  | Herbivore | Non-ruminant | Hall's Cave        | Holocene    | Present Study | collagen | calcaneus     | -17.0 | -16.9 | 4.2  | 2.9  |      |
| Lagomorpha | Leporidae   | <i>Lepus</i>    | <i>sp.</i>        | 41229        | 1824  | Herbivore | Non-ruminant | Hall's Cave        | Holocene    | Present Study | collagen | calcaneus     | -20.5 | -20.5 | 4.2  | 2.9  |      |
| Lagomorpha | Leporidae   | <i>Lepus</i>    | <i>sp.</i>        | 41229        | 1831  | Herbivore | Non-ruminant | Hall's Cave        | Holocene    | Present Study | collagen | skull         | -18.8 | -18.8 | 6.3  | 2.9  |      |
| Lagomorpha | Leporidae   | <i>Lepus</i>    | <i>sp.</i>        | 41229        | 2529  | Herbivore | Non-ruminant | Hall's Cave        | Pleistocene | Present Study | collagen | maxilla       | -18.5 | -18.5 | 6.4  | 2.9  |      |
| Lagomorpha | Leporidae   | <i>Lepus</i>    | <i>sp.</i>        | 41229        | 2557  | Herbivore | Non-ruminant | Hall's Cave        | Holocene    | Present Study | collagen | pelvis        | -17.0 | -17.0 | 5.9  | 2.8  |      |
| Lagomorpha | Leporidae   | <i>Lepus</i>    | <i>sp.</i>        | 41229        | 2558  | Herbivore | Non-ruminant | Hall's Cave        | Holocene    | Present Study | collagen | humerus       | -18.8 | -18.8 | 4.9  | 2.8  |      |
| Lagomorpha | Leporidae   | <i>Lepus</i>    | <i>sp.</i>        | 41229        | 2559  | Herbivore | Non-ruminant | Hall's Cave        | Holocene    | Present Study | collagen | ulna          | -12.1 | -12.1 | 5.2  | 2.7  |      |
| Lagomorpha | Leporidae   | <i>Lepus</i>    | <i>sp.</i>        | 41229        | 2560  | Herbivore | Non-ruminant | Hall's Cave        | Holocene    | Present Study | collagen | maxilla       | -11.2 | -11.2 | 6.6  | 2.9  |      |
| Lagomorpha | Leporidae   | <i>Lepus</i>    | <i>sp.</i>        | 41229        | 2563  | Herbivore | Non-ruminant | Hall's Cave        | Holocene    | Present Study | collagen | dentary       | -15.7 | -15.7 | 6.7  | 2.8  |      |
| Lagomorpha | Leporidae   | <i>Lepus</i>    | <i>sp.</i>        | 41229        | 2615  | Herbivore | Non-ruminant | Hall's Cave        | Holocene    | Present Study | collagen | maxilla       | -17.5 | -17.5 | 4.4  | 2.8  |      |
| Lagomorpha | Leporidae   | <i>Lepus</i>    | <i>sp.</i>        | 41229        | 2793  | Herbivore | Non-ruminant | Hall's Cave        | Holocene    | Present Study | collagen | dentary       | -17.9 | -17.9 | 5.0  | 2.8  |      |
| Lagomorpha | Leporidae   | <i>Lepus</i>    | <i>sp.</i>        | 41229        | 2815  | Herbivore | Non-ruminant | Hall's Cave        | Holocene    | Present Study | collagen | maxilla       | -13.4 | -13.4 | 5.9  | 2.7  |      |
| Lagomorpha | Leporidae   | <i>Lepus</i>    | <i>sp.</i>        | 41229        | 2833  | Herbivore | Non-ruminant | Hall's Cave        | Holocene    | Present Study | collagen | skull         | -14.4 | -14.4 | 5.6  | 2.9  |      |
| Lagomorpha | Leporidae   | <i>Lepus</i>    | <i>sp.</i>        | 41229        | 2846  | Herbivore | Non-ruminant | Hall's Cave        | Pleistocene | Present Study | collagen | maxilla       | -18.5 | -18.5 | 6.6  | 3.0  |      |
| Lagomorpha | Leporidae   | <i>Lepus</i>    | <i>sp.</i>        | 41229        | 2874  | Herbivore | Non-ruminant | Hall's Cave        | Holocene    | Present Study | collagen | premaxilla    | -14.0 | -14.0 | 4.3  | 2.7  |      |
| Lagomorpha | Leporidae   | <i>Lepus</i>    | <i>sp.</i>        | 41229        | 2875  | Herbivore | Non-ruminant | Hall's Cave        | Holocene    | Present Study | collagen | maxilla       | -11.5 | -11.5 | 5.6  | 2.9  |      |
| Lagomorpha | Leporidae   | <i>Lepus</i>    | <i>sp.</i>        | 41229        | 2876  | Herbivore | Non-ruminant | Hall's Cave        | Holocene    | Present Study | collagen | scapula       | -16.2 | -16.2 | 4.5  | 2.7  |      |
| Lagomorpha | Leporidae   | <i>Lepus</i>    | <i>sp.</i>        | 41229        | 2893  | Herbivore | Non-ruminant | Hall's Cave        | Holocene    | Present Study | collagen | dentary       | -19.9 | -19.9 | 4.5  | 2.8  |      |
| Lagomorpha | Leporidae   | <i>Lepus</i>    | <i>sp.</i>        | 41229        | 2894  | Herbivore | Non-ruminant | Hall's Cave        | Holocene    | Present Study | collagen | palate        | -18.8 | -18.8 | 3.3  | 2.7  |      |
| Lagomorpha | Leporidae   | <i>Lepus</i>    | <i>sp.</i>        | 41229        | 2897  | Herbivore | Non-ruminant | Hall's Cave        | Holocene    | Present Study | collagen | dentary       | -16.4 | -16.4 | 4.7  | 2.8  |      |
| Lagomorpha | Leporidae   | <i>Lepus</i>    | <i>sp.</i>        | 41229        | 3436  | Herbivore | Non-ruminant | Hall's Cave        | Pleistocene | Present Study | collagen | skull         | -17.6 | -17.6 | 5.5  | 2.9  |      |
| Lagomorpha | Leporidae   | <i>Lepus</i>    | <i>sp.</i>        | 41229        | 4097  | Herbivore | Non-ruminant | Hall's Cave        | Holocene    | Present Study | collagen | dentary       | -19.6 | -19.6 | 4.3  | 2.8  |      |
| Lagomorpha | Leporidae   | <i>Lepus</i>    | <i>sp.</i>        | 41229        | 4219  | Herbivore | Non-ruminant | Hall's Cave        | Holocene    | Present Study | collagen | maxilla       | -19.3 | -19.3 | 4.3  | 2.8  |      |

|            |           |                   |            |       |       |           |              |                   |             |               |          |              |       |       |      |      |
|------------|-----------|-------------------|------------|-------|-------|-----------|--------------|-------------------|-------------|---------------|----------|--------------|-------|-------|------|------|
| Lagomorpha | Leporidae | <i>Lepus</i>      | <i>sp.</i> | 41229 | 9514  | Herbivore | Non-ruminant | Hall's Cave       | Holocene    | Present Study | collagen | ulna         | -14.3 | -14.3 | 4.6  | 2.8  |
| Lagomorpha | Leporidae | <i>Lepus</i>      | <i>sp.</i> | 41229 | 9805  | Herbivore | Non-ruminant | Hall's Cave       | Holocene    | Present Study | collagen | metatarsal 4 | -18.5 | -18.5 | 3.8  | 2.8  |
| Lagomorpha | Leporidae | <i>Lepus</i>      | <i>sp.</i> | 41229 | 11018 | Herbivore | Non-ruminant | Hall's Cave       | Pleistocene | Present Study | collagen | dentary      | -21.9 | -21.9 | 6.8  | 2.8  |
| Lagomorpha | Leporidae | <i>Lepus</i>      | <i>sp.</i> | 41229 | 15088 | Herbivore | Non-ruminant | Hall's Cave       | Holocene    | Present Study | collagen | metatarsal   | -15.5 | -15.5 | 4.2  | 2.8  |
| Lagomorpha | Leporidae | <i>Lepus</i>      | <i>sp.</i> | 41229 | 15090 | Herbivore | Non-ruminant | Hall's Cave       | Holocene    | Present Study | collagen | ulna         | -16.7 | -16.6 | 3.1  | 2.8  |
| Lagomorpha | Leporidae | <i>Lepus</i>      | <i>sp.</i> | 41229 | 15091 | Herbivore | Non-ruminant | Hall's Cave       | Holocene    | Present Study | collagen | femur        | -15.7 | -15.7 | 4.0  | 2.8  |
| Lagomorpha | Leporidae | <i>Lepus</i>      | <i>sp.</i> | 41229 | 15092 | Herbivore | Non-ruminant | Hall's Cave       | Holocene    | Present Study | collagen | metatarsal   | -12.7 | -12.7 | 6.1  | 2.9  |
| Lagomorpha | Leporidae | <i>Lepus</i>      | <i>sp.</i> | 41229 | 15098 | Herbivore | Non-ruminant | Hall's Cave       | Holocene    | Present Study | collagen | metacarpal   | -15.2 | -15.2 | 6.3  | 2.9  |
| Lagomorpha | Leporidae | <i>Lepus</i>      | <i>sp.</i> | 41229 | 15105 | Herbivore | Non-ruminant | Hall's Cave       | Holocene    | Present Study | collagen | dentary      | -17.1 | -17.1 | 6.7  | 2.9  |
| Lagomorpha | Leporidae | <i>Lepus</i>      | <i>sp.</i> | 41229 | 15112 | Herbivore | Non-ruminant | Hall's Cave       | Holocene    | Present Study | collagen | ulna         | -14.6 | -14.6 | 7.2  | 2.8  |
| Lagomorpha | Leporidae | <i>Lepus</i>      | <i>sp.</i> | 41229 | 15113 | Herbivore | Non-ruminant | Hall's Cave       | Holocene    | Present Study | collagen | bone         | -14.3 | -14.3 | 5.7  | 2.8  |
| Lagomorpha | Leporidae | <i>Lepus</i>      | <i>sp.</i> | 41229 | 15129 | Herbivore | Non-ruminant | Hall's Cave       | Holocene    | Present Study | collagen | bone         | -10.4 | -10.4 | 5.5  | 2.7  |
| Lagomorpha | Leporidae | <i>Lepus</i>      | <i>sp.</i> | 41229 | 15142 | Herbivore | Non-ruminant | Hall's Cave       | Holocene    | Present Study | collagen | metatarsal   | -12.3 | -12.3 | 4.6  | 2.8  |
| Lagomorpha | Leporidae | <i>Lepus</i>      | <i>sp.</i> | 41229 | 15144 | Herbivore | Non-ruminant | Hall's Cave       | Holocene    | Present Study | collagen | humerus      | -18.3 | -18.3 | 5.0  | 2.8  |
| Lagomorpha | Leporidae | <i>Lepus</i>      | <i>sp.</i> | 41229 | 17909 | Herbivore | Non-ruminant | Hall's Cave       | Holocene    | Present Study | collagen | calcaneus    | -17.3 | -17.3 | 6.0  | 2.8  |
| Lagomorpha | Leporidae | <i>Lepus</i>      | <i>sp.</i> | 41229 | 17910 | Herbivore | Non-ruminant | Hall's Cave       | Holocene    | Present Study | collagen | calcaneus    | -17.0 | -17.0 | 6.0  | 2.8  |
| Lagomorpha | Leporidae | <i>Lepus</i>      | <i>sp.</i> | 41229 | 17912 | Herbivore | Non-ruminant | Hall's Cave       | Holocene    | Present Study | collagen | dentary      | -14.9 | -14.9 | 4.2  | 2.8  |
| Lagomorpha | Leporidae | <i>Lepus</i>      | <i>sp.</i> | 41229 | 17914 | Herbivore | Non-ruminant | Hall's Cave       | Holocene    | Present Study | collagen | dentary      | -13.1 | -13.1 | 6.4  | 2.8  |
| Lagomorpha | Leporidae | <i>Lepus</i>      | <i>sp.</i> | 41229 | 17915 | Herbivore | Non-ruminant | Hall's Cave       | Holocene    | Present Study | collagen | calcaneus    | -15.2 | -15.2 | 4.0  | 2.8  |
| Lagomorpha | Leporidae | <i>Lepus</i>      | <i>sp.</i> | 41229 | 17916 | Herbivore | Non-ruminant | Hall's Cave       | Holocene    | Present Study | collagen | calcaneus    | -15.6 | -15.6 | 4.9  | 2.8  |
| Lagomorpha | Leporidae | <i>Lepus</i>      | <i>sp.</i> | 41229 | 17957 | Herbivore | Non-ruminant | Hall's Cave       | Holocene    | Present Study | collagen | calcaneus    | -15.1 | -15.1 | 4.2  | 2.8  |
| Lagomorpha | Leporidae | <i>Lepus</i>      | <i>sp.</i> | 41229 | 17958 | Herbivore | Non-ruminant | Hall's Cave       | Holocene    | Present Study | collagen | tibia        | -16.9 | -16.9 | 4.2  | 2.7  |
| Lagomorpha | Leporidae | <i>Lepus</i>      | <i>sp.</i> | 41229 | 17959 | Herbivore | Non-ruminant | Hall's Cave       | Holocene    | Present Study | collagen | metacarpal   | -11.3 | -11.3 | 4.7  | 2.8  |
| Lagomorpha | Leporidae | <i>Lepus</i>      | <i>sp.</i> | 41229 | 17960 | Herbivore | Non-ruminant | Hall's Cave       | Holocene    | Present Study | collagen | astragalus   | -20.8 | -20.8 | 4.4  | 2.9  |
| Lagomorpha | Leporidae | <i>Lepus</i>      | <i>sp.</i> | 41229 | 17961 | Herbivore | Non-ruminant | Hall's Cave       | Holocene    | Present Study | collagen | dentary      | -17.8 | -17.8 | 4.1  | 2.8  |
| Lagomorpha | Leporidae | <i>Lepus</i>      | <i>sp.</i> | 41229 | 17962 | Herbivore | Non-ruminant | Hall's Cave       | Holocene    | Present Study | collagen | astragalus   | -15.6 | -15.6 | 3.1  | 2.8  |
| Lagomorpha | Leporidae | <i>Lepus</i>      | <i>sp.</i> | 41229 | 17964 | Herbivore | Non-ruminant | Hall's Cave       | Holocene    | Present Study | collagen | ulna         | -10.8 | -10.8 | 5.2  | 2.8  |
| Lagomorpha | Leporidae | <i>Lepus</i>      | <i>sp.</i> | 41229 | 17965 | Herbivore | Non-ruminant | Hall's Cave       | Holocene    | Present Study | collagen | tibia        | -9.0  | -9.0  | 5.0  | 2.8  |
| Lagomorpha | Leporidae | <i>Lepus</i>      | <i>sp.</i> | 41229 | 17968 | Herbivore | Non-ruminant | Hall's Cave       | Holocene    | Present Study | collagen | dentary      | -20.1 | -20.1 | 5.5  | 3.0  |
| Lagomorpha | Leporidae | <i>Lepus</i>      | <i>sp.</i> | 41229 | 17969 | Herbivore | Non-ruminant | Hall's Cave       | Holocene    | Present Study | collagen | dentary      | -22.4 | -22.4 | 7.6  | 2.9  |
| Lagomorpha | Leporidae | <i>Lepus</i>      | <i>sp.</i> | 41229 | 17970 | Herbivore | Non-ruminant | Hall's Cave       | Holocene    | Present Study | collagen | calcaneus    | -10.6 | -10.6 | 10.1 | 2.8  |
| Lagomorpha | Leporidae | <i>Lepus</i>      | <i>sp.</i> | 41229 | 17971 | Herbivore | Non-ruminant | Hall's Cave       | Holocene    | Present Study | collagen | metatarsal   | -17.6 | -17.6 | 6.0  | 2.8  |
| Lagomorpha | Leporidae | <i>Lepus</i>      | <i>sp.</i> | 41229 | 18007 | Herbivore | Non-ruminant | Hall's Cave       | Pleistocene | Present Study | collagen | metatarsal   | -20.0 | -20.0 | 5.8  | 2.9  |
| Lagomorpha | Leporidae | <i>Lepus</i>      | <i>sp.</i> | 41229 | 18011 | Herbivore | Non-ruminant | Hall's Cave       | Holocene    | Present Study | collagen | tibia        | -9.6  | -9.6  | 9.6  | 2.9  |
| Lagomorpha | Leporidae | <i>Lepus</i>      | <i>sp.</i> | 41229 | 18012 | Herbivore | Non-ruminant | Hall's Cave       | Pleistocene | Present Study | collagen | vertebra     | -11.9 | -11.9 | 9.6  | 2.8  |
| Lagomorpha | Leporidae | <i>Lepus</i>      | <i>sp.</i> | 41229 | 18013 | Herbivore | Non-ruminant | Hall's Cave       | Pleistocene | Present Study | collagen | acetabulum   | -16.7 | -16.7 | 5.4  | 2.9  |
| Lagomorpha | Leporidae | <i>Lepus</i>      | <i>sp.</i> | 41229 | 18014 | Herbivore | Non-ruminant | Hall's Cave       | Pleistocene | Present Study | collagen | vertebra     | -18.4 | -18.4 | 5.2  | 2.7  |
| Lagomorpha | Leporidae | <i>Lepus</i>      | <i>sp.</i> | 41229 | 18015 | Herbivore | Non-ruminant | Hall's Cave       | Pleistocene | Present Study | collagen | vertebra     | -10.8 | -10.8 | 8.0  | 2.8  |
| Lagomorpha | Leporidae | <i>Lepus</i>      | <i>sp.</i> | 41229 | 18016 | Herbivore | Non-ruminant | Hall's Cave       | Pleistocene | Present Study | collagen | vertebra     | -16.2 | -16.2 | 5.4  | 2.9  |
| Lagomorpha | Leporidae | <i>Lepus</i>      | <i>sp.</i> | 41229 | 18017 | Herbivore | Non-ruminant | Hall's Cave       | Pleistocene | Present Study | collagen | calcaneus    | -16.1 | -16.1 | 7.6  | 2.8  |
| Lagomorpha | Leporidae | <i>Lepus</i>      | <i>sp.</i> | 41229 | 18018 | Herbivore | Non-ruminant | Hall's Cave       | Pleistocene | Present Study | collagen | dentary      | -18.5 | -18.5 | 5.6  | 2.9  |
| Lagomorpha | Leporidae | <i>Lepus</i>      | <i>sp.</i> | 41229 | 18019 | Herbivore | Non-ruminant | Hall's Cave       | Pleistocene | Present Study | collagen | calcaneus    | -21.8 | -21.8 | 8.3  | 2.8  |
| Lagomorpha | Leporidae | <i>Lepus</i>      | <i>sp.</i> | 41229 | 18021 | Herbivore | Non-ruminant | Hall's Cave       | Pleistocene | Present Study | collagen | metatarsal   | -8.7  | -8.7  | 11.9 | 2.8  |
| Lagomorpha | Leporidae | <i>Lepus</i>      | <i>sp.</i> | 41229 | 18024 | Herbivore | Non-ruminant | Hall's Cave       | Pleistocene | Present Study | collagen | dentary      | -22.1 | -22.1 | 6.1  | 2.9  |
| Lagomorpha | Leporidae | <i>Lepus</i>      | <i>sp.</i> | 41229 | 18025 | Herbivore | Non-ruminant | Hall's Cave       | Pleistocene | Present Study | collagen | calcaneus    | -19.0 | -19.0 | 7.6  | 2.8  |
| Lagomorpha | Leporidae | <i>Lepus</i>      | <i>sp.</i> | 41229 | 18026 | Herbivore | Non-ruminant | Hall's Cave       | Pleistocene | Present Study | collagen | calcaneus    | -20.8 | -20.8 | 6.2  | 2.8  |
| Lagomorpha | Leporidae | <i>Lepus</i>      | <i>sp.</i> | 41229 | 18028 | Herbivore | Non-ruminant | Hall's Cave       | Pleistocene | Present Study | collagen | calcaneus    | -19.3 | -19.3 | 6.5  | 2.8  |
| Lagomorpha | Leporidae | <i>Lepus</i>      | <i>sp.</i> | 41229 | 18029 | Herbivore | Non-ruminant | Hall's Cave       | Pleistocene | Present Study | collagen | calcaneus    | -22.3 | -22.3 | 6.0  | 2.8  |
| Lagomorpha | Leporidae | <i>Lepus</i>      | <i>sp.</i> | 41229 | 18030 | Herbivore | Non-ruminant | Hall's Cave       | Pleistocene | Present Study | collagen | bone         | -21.9 | -21.9 | 5.7  | 2.8  |
| Lagomorpha | Leporidae | <i>Lepus</i>      | <i>sp.</i> | 41229 | 18031 | Herbivore | Non-ruminant | Hall's Cave       | Pleistocene | Present Study | collagen | n/a          | -21.6 | -21.6 | 6.0  | 2.9  |
| Lagomorpha | Leporidae | <i>Lepus</i>      | <i>sp.</i> | 41229 | 18032 | Herbivore | Non-ruminant | Hall's Cave       | Holocene    | Present Study | collagen | dentary      | -15.1 | -15.1 | 5.4  | 3.0  |
| Lagomorpha | Leporidae | <i>Lepus</i>      | <i>sp.</i> | 41229 | 18033 | Herbivore | Non-ruminant | Hall's Cave       | Holocene    | Present Study | collagen | dentary      | -19.8 | -19.8 | 5.3  | 3.1  |
| Lagomorpha | Leporidae | <i>Lepus</i>      | <i>sp.</i> | 41229 | 18034 | Herbivore | Non-ruminant | Hall's Cave       | Holocene    | Present Study | collagen | maxilla      | -19.0 | -19.0 | 7.4  | 3.0  |
| Lagomorpha | Leporidae | <i>Lepus</i>      | <i>sp.</i> | 41229 | 18035 | Herbivore | Non-ruminant | Hall's Cave       | Holocene    | Present Study | collagen | maxilla      | -22.0 | -22.0 | 9.3  | 3.1  |
| Lagomorpha | Leporidae | <i>Lepus</i>      | <i>sp.</i> | 41229 | 18036 | Herbivore | Non-ruminant | Hall's Cave       | Holocene    | Present Study | collagen | maxilla      | -20.8 | -20.8 | 7.3  | 3.1  |
| Lagomorpha | Leporidae | <i>Lepus</i>      | <i>sp.</i> | 41229 | 19675 | Herbivore | Non-ruminant | Hall's Cave       | Pleistocene | Present Study | collagen | dentary      | -20.2 | -20.2 | 3.3  | 2.8  |
| Lagomorpha | Leporidae | <i>Lepus</i>      | <i>sp.</i> | 41229 | 19677 | Herbivore | Non-ruminant | Hall's Cave       | Holocene    | Present Study | collagen | maxilla      | -16.4 | -16.4 | 4.3  | 2.9  |
| Lagomorpha | Leporidae | <i>Lepus</i>      | <i>sp.</i> | 43133 | 272   | Herbivore | Non-ruminant | Bering Sinkhole   | Holocene    | Present Study | collagen | skull        | -16.0 | -16.0 | 5.8  | 3.0  |
| Lagomorpha | Leporidae | <i>Lepus</i>      | <i>sp.</i> | 43133 | 274   | Herbivore | Non-ruminant | Bering Sinkhole   | Holocene    | Present Study | collagen | dentary      | -17.6 | -17.5 | 6.7  | 2.8  |
| Lagomorpha | Leporidae | <i>Lepus</i>      | <i>sp.</i> | 43133 | 291   | Herbivore | Non-ruminant | Bering Sinkhole   | Holocene    | Present Study | collagen | dentary      | -17.7 | -17.7 | 4.1  | 2.9  |
| Lagomorpha | Leporidae | <i>Lepus</i>      | <i>sp.</i> | 43133 | 333   | Herbivore | Non-ruminant | Bering Sinkhole   | Holocene    | Present Study | collagen | dentary      | -14.0 | -14.0 | 6.0  | 3.0  |
| Lagomorpha | Leporidae | <i>Lepus</i>      | <i>sp.</i> | 43133 | 1409  | Herbivore | Non-ruminant | Bering Sinkhole   | Holocene    | Present Study | collagen | dentary      | -18.1 | -18.1 | 2.8  | 2.8  |
| Lagomorpha | Leporidae | <i>Lepus</i>      | <i>sp.</i> | 40449 | 28    | Herbivore | Non-ruminant | Levi Rock Shelter | Holocene    | Present Study | collagen | tibia        | -26.5 | nd    | 1.7  | 12.1 |
| Lagomorpha | Leporidae | <i>Lepus</i>      | <i>sp.</i> | 40450 | 274   | Herbivore | Non-ruminant | ave Without A Nar | Pleistocene | Present Study | collagen | dentary      | -21.4 | -21.4 | 3.9  | 3.5  |
| Lagomorpha | Leporidae | <i>Lepus</i>      | <i>sp.</i> | 40450 | 257   | Herbivore | Non-ruminant | ave Without A Nar | Pleistocene | Present Study | collagen | dentary      | -21.0 | -21.0 | 3.0  | 3.4  |
| Lagomorpha | Leporidae | <i>Lepus</i>      | <i>sp.</i> | 41229 | 2792  | Herbivore | Non-ruminant | Hall's Cave       | Holocene    | Present Study | collagen | dentary      | -19.3 | -19.3 | 4.6  | 3.7  |
| Lagomorpha | Leporidae | <i>Sylvilagus</i> | <i>sp.</i> | 40450 | 125   | Herbivore | Non-ruminant | ave Without A Nar | Pleistocene | Present Study | enamel   | tooth        | -10.3 | -19.1 | NA   | 29.9 |
| Lagomorpha | Leporidae | <i>Sylvilagus</i> | <i>sp.</i> | 40450 | 392   | Herbivore | Non-ruminant | ave Without A Nar | Pleistocene | Present Study | collagen | femur        | -19.4 | -19.4 | 3.1  | 3.0  |
| Lagomorpha | Leporidae | <i>Sylvilagus</i> | <i>sp.</i> | 40450 | 408   | Herbivore | Non-ruminant | ave Without A Nar | Pleistocene | Present Study | collagen | tibia        | -19.0 | -19.0 | 3.2  | 3.0  |
| Lagomorpha | Leporidae | <i>Sylvilagus</i> | <i>sp.</i> | 40450 | 622   | Herbivore | Non-ruminant | ave Without A Nar | Pleistocene | Present Study | collagen | tibia        | -18.9 | -18.8 | 2.9  | 3.0  |
| Lagomorpha | Leporidae | <i>Sylvilagus</i> | <i>sp.</i> | 40450 | 629   | Herbivore | Non-ruminant | ave Without A Nar | Pleistocene | Present Study | collagen | humerus      | -18.1 | -18.1 | 3.1  | 2.9  |
| Lagomorpha | Leporidae | <i>Sylvilagus</i> | <i>sp.</i> | 40450 | 639   | Herbivore | Non-ruminant | ave Without A Nar | Pleistocene | Present Study | collagen | femur        | -19.2 | -19.2 | 2.9  | 3.0  |
| Lagomorpha | Leporidae | <i>Sylvilagus</i> | <i>sp.</i> | 40450 | 809   | Herbivore | Non-ruminant | ave Without A Nar | Pleistocene | Present Study | collagen | femur        | -20.1 | -20.1 | 4.4  | 3.1  |
| Lagomorpha | Leporidae | <i>Sylvilagus</i> | <i>sp.</i> | 40450 | 852   | Herbivore | Non-ruminant | ave Without A Nar | Pleistocene | Present Study | collagen | femur        | -18.9 | -18.9 | 2.8  | 2.9  |
| Lagomorpha | Leporidae | <i>Sylvilagus</i> | <i>sp.</i> | 41229 | 4     | Herbivore | Non-ruminant | Hall's Cave       | Holocene    | Present Study | collagen | dentary      | -18.6 | -18.6 | 3.7  | 2.8  |
| Lagomorpha | Leporidae | <i>Sylvilagus</i> | <i>sp.</i> | 41229 | 351   | Herbivore | Non-ruminant | Hall's Cave       | Pleistocene | Present Study | collagen | dentary      | -16.0 | -16.0 | 8.1  | 2.9  |
| Lagomorpha | Leporidae | <i>Sylvilagus</i> | <i>sp.</i> | 41229 | 680   | Herbivore | Non-ruminant | Hall's Cave       | Pleistocene | Present Study | collagen | sacral       | -18.1 | -18.1 | 6.6  | 3.1  |
| Lagomorpha | Leporidae | <i>Sylvilagus</i> | <i>sp.</i> | 41229 | 689   | Herbivore | Non-ruminant | Hall's Cave       | Holocene    | Present Study | collagen | maxilla      | -15.2 | -15.2 | 5.9  | 2.9  |
| Lagomorpha | Leporidae | <i>Sylvilagus</i> | <i>sp.</i> | 41229 | 701   | Herbivore | Non-ruminant | Hall's Cave       | Holocene    | Present Study | collagen | maxilla      | -16.7 | -16.7 | 4.8  | 2.9  |
| Lagomorpha | Leporidae | <i>Sylvilagus</i> | <i>sp.</i> | 41229 | 742   | Herbivore | Non-ruminant | Hall's Cave       | Pleistocene | Present Study | collagen | maxilla      | -21.9 | -21.9 | 9.5  | 3.1  |
| Lagomorpha | Leporidae | <i>Sylvilagus</i> | <i>sp.</i> | 41229 | 863   | Herbivore | Non-ruminant | Hall's Cave       | Holocene    | Present Study | collagen | dentary      | -17.5 | -17.5 | 4.6  | 2.9  |
| Lagomorpha | Leporidae | <i>Sylvilagus</i> | <i>sp.</i> | 41229 | 866   | Herbivore | Non-ruminant | Hall's Cave       | Holocene    | Present Study | collagen | maxilla      | -18.4 | -18.4 | 4.6  | 2.9  |
| Lagomorpha | Leporidae | <i>Sylvilagus</i> | <i>sp.</i> | 41229 | 982   |           |              |                   |             |               |          |              |       |       |      |      |

|            |           |                   |            |       |       |           |              |             |             |               |          |               |       |       |     |     |
|------------|-----------|-------------------|------------|-------|-------|-----------|--------------|-------------|-------------|---------------|----------|---------------|-------|-------|-----|-----|
| Lagomorpha | Leporidae | <i>Sylvilagus</i> | <i>sp.</i> | 41229 | 1596  | Herbivore | Non-ruminant | Hall's Cave | Holocene    | Present Study | collagen | pelvis        | -18.3 | -18.3 | 5.6 | 2.8 |
| Lagomorpha | Leporidae | <i>Sylvilagus</i> | <i>sp.</i> | 41229 | 1597  | Herbivore | Non-ruminant | Hall's Cave | Holocene    | Present Study | collagen | dentary       | -16.5 | -16.5 | 5.6 | 3.0 |
| Lagomorpha | Leporidae | <i>Sylvilagus</i> | <i>sp.</i> | 41229 | 1598  | Herbivore | Non-ruminant | Hall's Cave | Holocene    | Present Study | collagen | dentary       | -13.8 | -13.8 | 5.9 | 2.9 |
| Lagomorpha | Leporidae | <i>Sylvilagus</i> | <i>sp.</i> | 41229 | 1604  | Herbivore | Non-ruminant | Hall's Cave | Holocene    | Present Study | collagen | skull         | -17.6 | -17.6 | 5.0 | 2.9 |
| Lagomorpha | Leporidae | <i>Sylvilagus</i> | <i>sp.</i> | 41229 | 1785  | Herbivore | Non-ruminant | Hall's Cave | Pleistocene | Present Study | collagen | humerus       | -17.3 | -17.3 | 3.4 | 2.9 |
| Lagomorpha | Leporidae | <i>Sylvilagus</i> | <i>sp.</i> | 41229 | 2594  | Herbivore | Non-ruminant | Hall's Cave | Holocene    | Present Study | collagen | dentary       | -18.6 | -18.6 | 6.4 | 3.1 |
| Lagomorpha | Leporidae | <i>Sylvilagus</i> | <i>sp.</i> | 41229 | 2602  | Herbivore | Non-ruminant | Hall's Cave | Pleistocene | Present Study | collagen | lumbar verte  | -19.9 | -19.9 | 6.3 | 3.0 |
| Lagomorpha | Leporidae | <i>Sylvilagus</i> | <i>sp.</i> | 41229 | 2673  | Herbivore | Non-ruminant | Hall's Cave | Pleistocene | Present Study | collagen | dentary       | -15.4 | -15.4 | 5.8 | 3.0 |
| Lagomorpha | Leporidae | <i>Sylvilagus</i> | <i>sp.</i> | 41229 | 2896  | Herbivore | Non-ruminant | Hall's Cave | Holocene    | Present Study | collagen | dentary       | -18.3 | -18.3 | 5.9 | 2.9 |
| Lagomorpha | Leporidae | <i>Sylvilagus</i> | <i>sp.</i> | 41229 | 2926  | Herbivore | Non-ruminant | Hall's Cave | Holocene    | Present Study | collagen | maxilla       | -22.1 | -22.1 | 4.4 | 3.1 |
| Lagomorpha | Leporidae | <i>Sylvilagus</i> | <i>sp.</i> | 41229 | 2939  | Herbivore | Non-ruminant | Hall's Cave | Holocene    | Present Study | collagen | scapula       | -19.4 | -19.4 | 4.3 | 2.8 |
| Lagomorpha | Leporidae | <i>Sylvilagus</i> | <i>sp.</i> | 41229 | 2952  | Herbivore | Non-ruminant | Hall's Cave | Pleistocene | Present Study | collagen | lumbar verte  | -17.2 | -17.2 | 6.1 | 2.8 |
| Lagomorpha | Leporidae | <i>Sylvilagus</i> | <i>sp.</i> | 41229 | 2953  | Herbivore | Non-ruminant | Hall's Cave | Pleistocene | Present Study | collagen | frontal       | -18.9 | -18.9 | 3.6 | 2.9 |
| Lagomorpha | Leporidae | <i>Sylvilagus</i> | <i>sp.</i> | 41229 | 2954  | Herbivore | Non-ruminant | Hall's Cave | Pleistocene | Present Study | collagen | dentary       | -21.1 | -21.1 | 5.1 | 3.0 |
| Lagomorpha | Leporidae | <i>Sylvilagus</i> | <i>sp.</i> | 41229 | 3434  | Herbivore | Non-ruminant | Hall's Cave | Pleistocene | Present Study | collagen | astragalus    | -20.5 | -20.5 | 4.9 | 2.8 |
| Lagomorpha | Leporidae | <i>Sylvilagus</i> | <i>sp.</i> | 41229 | 3527  | Herbivore | Non-ruminant | Hall's Cave | Pleistocene | Present Study | collagen | dentary       | -20.1 | -20.1 | 6.2 | 3.0 |
| Lagomorpha | Leporidae | <i>Sylvilagus</i> | <i>sp.</i> | 41229 | 4017  | Herbivore | Non-ruminant | Hall's Cave | Holocene    | Present Study | collagen | bone          | -13.1 | -13.1 | 5.3 | 2.9 |
| Lagomorpha | Leporidae | <i>Sylvilagus</i> | <i>sp.</i> | 41229 | 4018  | Herbivore | Non-ruminant | Hall's Cave | Holocene    | Present Study | collagen | bone          | -13.3 | -13.3 | 5.7 | 2.9 |
| Lagomorpha | Leporidae | <i>Sylvilagus</i> | <i>sp.</i> | 41229 | 4042  | Herbivore | Non-ruminant | Hall's Cave | Pleistocene | Present Study | collagen | ulna          | -15.8 | -15.8 | 5.4 | 2.8 |
| Lagomorpha | Leporidae | <i>Sylvilagus</i> | <i>sp.</i> | 41229 | 4098  | Herbivore | Non-ruminant | Hall's Cave | Holocene    | Present Study | collagen | dentary       | -14.1 | -14.1 | 6.0 | 2.9 |
| Lagomorpha | Leporidae | <i>Sylvilagus</i> | <i>sp.</i> | 41229 | 4753  | Herbivore | Non-ruminant | Hall's Cave | Holocene    | Present Study | collagen | humerus       | -15.7 | -15.7 | 6.2 | 2.9 |
| Lagomorpha | Leporidae | <i>Sylvilagus</i> | <i>sp.</i> | 41229 | 4841  | Herbivore | Non-ruminant | Hall's Cave | Holocene    | Present Study | collagen | metatarsal    | -13.9 | -13.8 | 5.0 | 2.8 |
| Lagomorpha | Leporidae | <i>Sylvilagus</i> | <i>sp.</i> | 41229 | 4998  | Herbivore | Non-ruminant | Hall's Cave | Holocene    | Present Study | collagen | bone          | -18.1 | -18.1 | 7.2 | 2.8 |
| Lagomorpha | Leporidae | <i>Sylvilagus</i> | <i>sp.</i> | 41229 | 5000  | Herbivore | Non-ruminant | Hall's Cave | Holocene    | Present Study | collagen | maxilla       | -16.9 | -16.9 | 5.7 | 2.9 |
| Lagomorpha | Leporidae | <i>Sylvilagus</i> | <i>sp.</i> | 41229 | 5001  | Herbivore | Non-ruminant | Hall's Cave | Holocene    | Present Study | collagen | dentary       | -18.2 | -18.2 | 4.4 | 2.8 |
| Lagomorpha | Leporidae | <i>Sylvilagus</i> | <i>sp.</i> | 41229 | 5002  | Herbivore | Non-ruminant | Hall's Cave | Holocene    | Present Study | collagen | dentary       | -15.4 | -15.4 | 5.3 | 2.9 |
| Lagomorpha | Leporidae | <i>Sylvilagus</i> | <i>sp.</i> | 41229 | 5003  | Herbivore | Non-ruminant | Hall's Cave | Holocene    | Present Study | collagen | bone          | -16.2 | -16.2 | 6.6 | 2.9 |
| Lagomorpha | Leporidae | <i>Sylvilagus</i> | <i>sp.</i> | 41229 | 5111  | Herbivore | Non-ruminant | Hall's Cave | Holocene    | Present Study | collagen | metatarsal    | -15.8 | -15.8 | 5.0 | 2.9 |
| Lagomorpha | Leporidae | <i>Sylvilagus</i> | <i>sp.</i> | 41229 | 5301  | Herbivore | Non-ruminant | Hall's Cave | Holocene    | Present Study | collagen | humerus       | -18.0 | -18.0 | 5.4 | 2.8 |
| Lagomorpha | Leporidae | <i>Sylvilagus</i> | <i>sp.</i> | 41229 | 5921  | Herbivore | Non-ruminant | Hall's Cave | Holocene    | Present Study | collagen | bone          | -18.6 | -18.6 | 6.6 | 3.1 |
| Lagomorpha | Leporidae | <i>Sylvilagus</i> | <i>sp.</i> | 41229 | 5922  | Herbivore | Non-ruminant | Hall's Cave | Holocene    | Present Study | collagen | bone          | -18.1 | -18.1 | 6.6 | 3.0 |
| Lagomorpha | Leporidae | <i>Sylvilagus</i> | <i>sp.</i> | 41229 | 6076  | Herbivore | Non-ruminant | Hall's Cave | Holocene    | Present Study | collagen | n/a           | -18.9 | -18.9 | 5.3 | 2.8 |
| Lagomorpha | Leporidae | <i>Sylvilagus</i> | <i>sp.</i> | 41229 | 6077  | Herbivore | Non-ruminant | Hall's Cave | Pleistocene | Present Study | collagen | scapula       | -17.9 | -17.9 | 3.8 | 2.8 |
| Lagomorpha | Leporidae | <i>Sylvilagus</i> | <i>sp.</i> | 41229 | 7405  | Herbivore | Non-ruminant | Hall's Cave | Holocene    | Present Study | collagen | metatarsal    | -12.8 | -12.8 | 4.4 | 2.8 |
| Lagomorpha | Leporidae | <i>Sylvilagus</i> | <i>sp.</i> | 41229 | 7429  | Herbivore | Non-ruminant | Hall's Cave | Holocene    | Present Study | collagen | dentary       | -13.0 | -13.0 | 6.6 | 3.0 |
| Lagomorpha | Leporidae | <i>Sylvilagus</i> | <i>sp.</i> | 41229 | 7436  | Herbivore | Non-ruminant | Hall's Cave | Holocene    | Present Study | collagen | premaxilla    | -13.1 | -13.1 | 5.0 | 2.8 |
| Lagomorpha | Leporidae | <i>Sylvilagus</i> | <i>sp.</i> | 41229 | 7437  | Herbivore | Non-ruminant | Hall's Cave | Holocene    | Present Study | collagen | premaxilla    | -15.5 | -15.5 | 5.0 | 2.9 |
| Lagomorpha | Leporidae | <i>Sylvilagus</i> | <i>sp.</i> | 41229 | 7438  | Herbivore | Non-ruminant | Hall's Cave | Holocene    | Present Study | collagen | premaxilla    | -19.2 | -19.2 | 5.4 | 2.9 |
| Lagomorpha | Leporidae | <i>Sylvilagus</i> | <i>sp.</i> | 41229 | 7439  | Herbivore | Non-ruminant | Hall's Cave | Holocene    | Present Study | collagen | dentary       | -13.6 | -13.6 | 4.9 | 2.9 |
| Lagomorpha | Leporidae | <i>Sylvilagus</i> | <i>sp.</i> | 41229 | 7442  | Herbivore | Non-ruminant | Hall's Cave | Holocene    | Present Study | collagen | dentary       | -17.6 | -17.6 | 5.2 | 2.9 |
| Lagomorpha | Leporidae | <i>Sylvilagus</i> | <i>sp.</i> | 41229 | 7936  | Herbivore | Non-ruminant | Hall's Cave | Holocene    | Present Study | collagen | skull         | -17.4 | -17.4 | 4.8 | 2.8 |
| Lagomorpha | Leporidae | <i>Sylvilagus</i> | <i>sp.</i> | 41229 | 8009  | Herbivore | Non-ruminant | Hall's Cave | Pleistocene | Present Study | collagen | femur         | -16.9 | -16.9 | 5.6 | 2.8 |
| Lagomorpha | Leporidae | <i>Sylvilagus</i> | <i>sp.</i> | 41229 | 8209  | Herbivore | Non-ruminant | Hall's Cave | Holocene    | Present Study | collagen | scapula       | -19.3 | -19.3 | 6.4 | 2.9 |
| Lagomorpha | Leporidae | <i>Sylvilagus</i> | <i>sp.</i> | 41229 | 8271  | Herbivore | Non-ruminant | Hall's Cave | Pleistocene | Present Study | collagen | maxilla       | -20.0 | -20.0 | 5.3 | 2.8 |
| Lagomorpha | Leporidae | <i>Sylvilagus</i> | <i>sp.</i> | 41229 | 9006  | Herbivore | Non-ruminant | Hall's Cave | Holocene    | Present Study | collagen | vertebra      | -15.4 | -15.4 | 3.5 | 2.8 |
| Lagomorpha | Leporidae | <i>Sylvilagus</i> | <i>sp.</i> | 41229 | 9027  | Herbivore | Non-ruminant | Hall's Cave | Pleistocene | Present Study | collagen | metatarsal    | -18.4 | -18.3 | 4.5 | 2.9 |
| Lagomorpha | Leporidae | <i>Sylvilagus</i> | <i>sp.</i> | 41229 | 9509  | Herbivore | Non-ruminant | Hall's Cave | Holocene    | Present Study | collagen | dentary       | -21.6 | -21.6 | 4.1 | 2.9 |
| Lagomorpha | Leporidae | <i>Sylvilagus</i> | <i>sp.</i> | 41229 | 9510  | Herbivore | Non-ruminant | Hall's Cave | Holocene    | Present Study | collagen | dentary       | -19.2 | -19.2 | 5.8 | 2.8 |
| Lagomorpha | Leporidae | <i>Sylvilagus</i> | <i>sp.</i> | 41229 | 9806  | Herbivore | Non-ruminant | Hall's Cave | Holocene    | Present Study | collagen | bone          | -17.0 | -17.0 | 4.6 | 2.8 |
| Lagomorpha | Leporidae | <i>Sylvilagus</i> | <i>sp.</i> | 41229 | 9825  | Herbivore | Non-ruminant | Hall's Cave | Pleistocene | Present Study | collagen | metatarsal    | -14.5 | -14.5 | 8.7 | 2.7 |
| Lagomorpha | Leporidae | <i>Sylvilagus</i> | <i>sp.</i> | 41229 | 9988  | Herbivore | Non-ruminant | Hall's Cave | Holocene    | Present Study | collagen | calcaneus     | -16.7 | -16.7 | 4.1 | 2.9 |
| Lagomorpha | Leporidae | <i>Sylvilagus</i> | <i>sp.</i> | 41229 | 9989  | Herbivore | Non-ruminant | Hall's Cave | Holocene    | Present Study | collagen | humerus       | -18.9 | -18.9 | 4.6 | 2.8 |
| Lagomorpha | Leporidae | <i>Sylvilagus</i> | <i>sp.</i> | 41229 | 10166 | Herbivore | Non-ruminant | Hall's Cave | Pleistocene | Present Study | collagen | scapula       | -18.8 | -18.8 | 3.1 | 2.8 |
| Lagomorpha | Leporidae | <i>Sylvilagus</i> | <i>sp.</i> | 41229 | 10167 | Herbivore | Non-ruminant | Hall's Cave | Pleistocene | Present Study | collagen | tibia         | -14.0 | -14.0 | 6.9 | 2.8 |
| Lagomorpha | Leporidae | <i>Sylvilagus</i> | <i>sp.</i> | 41229 | 10265 | Herbivore | Non-ruminant | Hall's Cave | Pleistocene | Present Study | collagen | imbar vertebi | -18.2 | -18.2 | 8.6 | 2.9 |
| Lagomorpha | Leporidae | <i>Sylvilagus</i> | <i>sp.</i> | 41229 | 10268 | Herbivore | Non-ruminant | Hall's Cave | Pleistocene | Present Study | collagen | radius        | -17.7 | -17.7 | 5.3 | 2.8 |
| Lagomorpha | Leporidae | <i>Sylvilagus</i> | <i>sp.</i> | 41229 | 10284 | Herbivore | Non-ruminant | Hall's Cave | Pleistocene | Present Study | collagen | metapodial    | -20.2 | -20.2 | 4.5 | 2.7 |
| Lagomorpha | Leporidae | <i>Sylvilagus</i> | <i>sp.</i> | 41229 | 10351 | Herbivore | Non-ruminant | Hall's Cave | Holocene    | Present Study | collagen | dentary       | -15.8 | -15.8 | 6.0 | 2.9 |
| Lagomorpha | Leporidae | <i>Sylvilagus</i> | <i>sp.</i> | 41229 | 10903 | Herbivore | Non-ruminant | Hall's Cave | Pleistocene | Present Study | collagen | thoracic vert | -20.0 | -20.0 | 4.6 | 2.8 |
| Lagomorpha | Leporidae | <i>Sylvilagus</i> | <i>sp.</i> | 41229 | 10914 | Herbivore | Non-ruminant | Hall's Cave | Pleistocene | Present Study | collagen | lumbar verte  | -15.1 | -15.1 | 6.4 | 2.8 |
| Lagomorpha | Leporidae | <i>Sylvilagus</i> | <i>sp.</i> | 41229 | 10924 | Herbivore | Non-ruminant | Hall's Cave | Pleistocene | Present Study | collagen | scapula       | -17.5 | -17.5 | 3.9 | 2.8 |
| Lagomorpha | Leporidae | <i>Sylvilagus</i> | <i>sp.</i> | 41229 | 10925 | Herbivore | Non-ruminant | Hall's Cave | Pleistocene | Present Study | collagen | scapula       | -21.3 | -21.3 | 3.4 | 2.8 |
| Lagomorpha | Leporidae | <i>Sylvilagus</i> | <i>sp.</i> | 41229 | 10926 | Herbivore | Non-ruminant | Hall's Cave | Pleistocene | Present Study | collagen | ulna          | -16.4 | -16.4 | 5.1 | 2.8 |
| Lagomorpha | Leporidae | <i>Sylvilagus</i> | <i>sp.</i> | 41229 | 10927 | Herbivore | Non-ruminant | Hall's Cave | Pleistocene | Present Study | collagen | rib           | -17.2 | -17.2 | 3.7 | 2.8 |
| Lagomorpha | Leporidae | <i>Sylvilagus</i> | <i>sp.</i> | 41229 | 10998 | Herbivore | Non-ruminant | Hall's Cave | Pleistocene | Present Study | collagen | dentary       | -19.3 | -19.3 | 4.0 | 2.9 |
| Lagomorpha | Leporidae | <i>Sylvilagus</i> | <i>sp.</i> | 41229 | 10999 | Herbivore | Non-ruminant | Hall's Cave | Pleistocene | Present Study | collagen | femur         | -18.8 | -18.8 | 3.6 | 2.8 |
| Lagomorpha | Leporidae | <i>Sylvilagus</i> | <i>sp.</i> | 41229 | 11002 | Herbivore | Non-ruminant | Hall's Cave | Pleistocene | Present Study | collagen | metacarpal    | -20.1 | -20.1 | 3.0 | 2.8 |
| Lagomorpha | Leporidae | <i>Sylvilagus</i> | <i>sp.</i> | 41229 | 11019 | Herbivore | Non-ruminant | Hall's Cave | Pleistocene | Present Study | collagen | ulna          | -20.5 | -20.5 | 4.6 | 2.8 |
| Lagomorpha | Leporidae | <i>Sylvilagus</i> | <i>sp.</i> | 41229 | 11022 | Herbivore | Non-ruminant | Hall's Cave | Pleistocene | Present Study | collagen | lumbar verte  | -22.0 | -22.0 | 6.0 | 2.8 |
| Lagomorpha | Leporidae | <i>Sylvilagus</i> | <i>sp.</i> | 41229 | 11236 | Herbivore | Non-ruminant | Hall's Cave | Pleistocene | Present Study | collagen | humerus       | -17.7 | -17.7 | 3.8 | 2.8 |
| Lagomorpha | Leporidae | <i>Sylvilagus</i> | <i>sp.</i> | 41229 | 11245 | Herbivore | Non-ruminant | Hall's Cave | Pleistocene | Present Study | collagen | vertebra      | -18.5 | -18.5 | 4.2 | 2.8 |
| Lagomorpha | Leporidae | <i>Sylvilagus</i> | <i>sp.</i> | 41229 | 11246 | Herbivore | Non-ruminant | Hall's Cave | Pleistocene | Present Study | collagen | ulna          | -18.7 | -18.6 | 3.5 | 2.8 |
| Lagomorpha | Leporidae | <i>Sylvilagus</i> | <i>sp.</i> | 41229 | 11247 | Herbivore | Non-ruminant | Hall's Cave | Pleistocene | Present Study | collagen | dentary       | -21.8 | -21.8 | 3.6 | 2.9 |
| Lagomorpha | Leporidae | <i>Sylvilagus</i> | <i>sp.</i> | 41229 | 11446 | Herbivore | Non-ruminant | Hall's Cave | Pleistocene | Present Study | collagen | femur         | -20.3 | -20.3 | 1.8 | 2.8 |
| Lagomorpha | Leporidae | <i>Sylvilagus</i> | <i>sp.</i> | 41229 | 11683 | Herbivore | Non-ruminant | Hall's Cave | Pleistocene | Present Study | collagen | ulna          | -15.7 | -15.7 | 3.7 | 2.8 |
| Lagomorpha | Leporidae | <i>Sylvilagus</i> | <i>sp.</i> | 41229 | 11684 | Herbivore | Non-ruminant | Hall's Cave | Pleistocene | Present Study | collagen | dentary       | -16.7 | -16.7 | 4.2 | 2.9 |
| Lagomorpha | Leporidae | <i>Sylvilagus</i> | <i>sp.</i> | 41229 | 14000 | Herbivore | Non-ruminant | Hall's Cave | Holocene    | Present Study | collagen | radius        | -16.8 | -16.8 | 5.0 | 2.8 |
| Lagomorpha | Leporidae | <i>Sylvilagus</i> | <i>sp.</i> | 41229 | 14048 | Herbivore | Non-ruminant | Hall's Cave | Holocene    | Present Study | collagen | bone          | -17.4 | -17.4 | 5.4 | 3.0 |
| Lagomorpha | Leporidae | <i>Sylvilagus</i> | <i>sp.</i> | 41229 | 16952 | Herbivore | Non-ruminant | Hall's Cave | Holocene    | Present Study | collagen | femur         | -18.5 | -18.5 | 5.0 | 2.9 |
| Lagomorpha | Leporidae | <i>Sylvilagus</i> | <i>sp.</i> | 41229 | 16955 | Herbivore | Non-ruminant | Hall's Cave | Holocene    | Present Study | collagen | tibia         | -17.8 | -17.8 | 5.4 | 2.8 |
| Lagomorpha | Leporidae | <i>Sylvilagus</i> | <i>sp.</i> | 41229 | 16956 | Herbivore | Non-ruminant | Hall's Cave | Holocene    | Present Study | collagen | astragalus    | -20.2 | -20.2 | 6.1 | 2.8 |
| Lagomorpha | Leporidae | <i>Sylvilagus</i> | <i>sp.</i> | 41229 | 16958 | Herbivore | Non-ruminant | Hall's Cave | Holocene    | Present Study | collagen | calcaneus     | -19.6 | -19.6 | 4.4 | 3.0 |





|                |           |                   |     |       |       |           |              |                  |             |                     |          |              |       |       |      |      |      |     |
|----------------|-----------|-------------------|-----|-------|-------|-----------|--------------|------------------|-------------|---------------------|----------|--------------|-------|-------|------|------|------|-----|
| Lagomorpha     | Leporidae | <i>Sylvilagus</i> | sp. | 41229 | 17807 | Herbivore | Non-ruminant | Hall's Cave      | Pleistocene | Present Study       | collagen | vertebra     | -17.7 | -17.7 | 4.7  | 2.8  |      |     |
| Lagomorpha     | Leporidae | <i>Sylvilagus</i> | sp. | 41229 | 17848 | Herbivore | Non-ruminant | Hall's Cave      | Pleistocene | Present Study       | collagen | femur        | -18.5 | -18.5 | 3.3  | 2.8  |      |     |
| Lagomorpha     | Leporidae | <i>Sylvilagus</i> | sp. | 43133 | 828   | Herbivore | Non-ruminant | Bering Sinkhole  | Holocene    | Present Study       | collagen | dentary      | -16.8 | -16.8 | 3.9  | 2.8  |      |     |
| Lagomorpha     | Leporidae | <i>Sylvilagus</i> | sp. | 43133 | 829   | Herbivore | Non-ruminant | Bering Sinkhole  | Holocene    | Present Study       | collagen | dentary      | -17.0 | -17.0 | 3.9  | 2.9  |      |     |
| Lagomorpha     | Leporidae | <i>Sylvilagus</i> | sp. | 43133 | 830   | Herbivore | Non-ruminant | Bering Sinkhole  | Holocene    | Present Study       | collagen | dentary      | -18.5 | -18.5 | 3.5  | 2.9  |      |     |
| Lagomorpha     | Leporidae | <i>Sylvilagus</i> | sp. | 41229 | 10285 | Herbivore | Non-ruminant | Hall's Cave      | Pleistocene | Present Study       | collagen | calcanus     | -21.1 | -21.1 | bdll | 3.1  |      |     |
| Lagomorpha     | Leporidae | <i>Sylvilagus</i> | sp. | 41229 | 7646  | Herbivore | Non-ruminant | Hall's Cave      | Holocene    | Present Study       | collagen | dentary      | -17.3 | nd    | 5.1  | 4.1  |      |     |
| Lagomorpha     | Leporidae | <i>Sylvilagus</i> | sp. | 41229 | 984   | Herbivore | Non-ruminant | Hall's Cave      | Pleistocene | Present Study       | enamel   | tooth        | bdll  | nd    | na   | nd   |      |     |
| Perissodactyla | Equidae   | <i>Equus</i>      | sp. | 908   | 2295  | Herbivore | Non-ruminant | Kincaid Shelter  | Pleistocene | Present Study       | enamel   | premolar 3   | -4.0  | -12.8 | NA   | 26.2 | -4.5 | nd  |
| Perissodactyla | Equidae   | <i>Equus</i>      | sp. | 908   | 2310  | Herbivore | Non-ruminant | Kincaid Shelter  | Pleistocene | Present Study       | collagen | maxilla      | -20.2 | -20.2 | 8.1  |      |      | 2.9 |
| Perissodactyla | Equidae   | <i>Equus</i>      | sp. | 908   | 2331  | Herbivore | Non-ruminant | Kincaid Shelter  | Pleistocene | Present Study       | enamel   | premolar 1   | -4.7  | -13.5 | NA   |      | -0.6 | nd  |
| Perissodactyla | Equidae   | <i>Equus</i>      | sp. | 908   | 2358  | Herbivore | Non-ruminant | Kincaid Shelter  | Pleistocene | Present Study       | enamel   | tooth        | -3.7  | -12.5 | NA   |      | -4.7 | nd  |
| Perissodactyla | Equidae   | <i>Equus</i>      | sp. | 908   | 2380  | Herbivore | Non-ruminant | Kincaid Shelter  | Pleistocene | Present Study       | enamel   | tooth        | -6.8  | -15.6 | NA   | 28.0 | -2.8 | nd  |
| Perissodactyla | Equidae   | <i>Equus</i>      | sp. | 908   | 2422  | Herbivore | Non-ruminant | Kincaid Shelter  | Pleistocene | Koch 2004           | enamel   | molar 3      | -5.4  | -14.2 | NA   | 25.0 | -5.7 | nd  |
| Perissodactyla | Equidae   | <i>Equus</i>      | sp. | 908   | 2422  | Herbivore | Non-ruminant | Kincaid Shelter  | Pleistocene | Present Study       | enamel   | molar 3      | -5.4  | -14.2 | NA   | 25.0 | -5.7 | nd  |
| Perissodactyla | Equidae   | <i>Equus</i>      | sp. | 908   | 2436  | Herbivore | Non-ruminant | Kincaid Shelter  | Pleistocene | Koch 2004           | enamel   | molar 3      | -2.3  | -11.1 | NA   | 31.0 | 0.2  | nd  |
| Perissodactyla | Equidae   | <i>Equus</i>      | sp. | 908   | 2462  | Herbivore | Non-ruminant | Kincaid Shelter  | Pleistocene | Present Study       | enamel   | incisor      | -0.5  | -9.3  | NA   |      | -0.8 | nd  |
| Perissodactyla | Equidae   | <i>Equus</i>      | sp. | 908   | 2466  | Herbivore | Non-ruminant | Kincaid Shelter  | Pleistocene | Present Study       | enamel   | tooth        | -1.3  | -10.1 | NA   |      | -1.9 | nd  |
| Perissodactyla | Equidae   | <i>Equus</i>      | sp. | 908   | 2471  | Herbivore | Non-ruminant | Kincaid Shelter  | Pleistocene | Present Study       | enamel   | tooth        | -2.0  | -10.8 | NA   |      | -0.1 | nd  |
| Perissodactyla | Equidae   | <i>Equus</i>      | sp. | 933   | 1284  | Herbivore | Non-ruminant | Friesenhahn Cave | Pleistocene | Koch 2004           | enamel   | premolar     | -3.9  | -12.7 | NA   | 28.5 | -2.3 | nd  |
| Perissodactyla | Equidae   | <i>Equus</i>      | sp. | 933   | 1284  | Herbivore | Non-ruminant | Friesenhahn Cave | Pleistocene | Present Study       | enamel   | premolar 4   | -3.9  | -12.7 | NA   | 28.5 | -2.3 | nd  |
| Perissodactyla | Equidae   | <i>Equus</i>      | sp. | 933   | 209A  | Herbivore | Non-ruminant | Friesenhahn Cave | Pleistocene | Koch 2004           | enamel   | molar        | -3.9  | -12.7 | NA   | 28.4 | -2.4 | nd  |
| Perissodactyla | Equidae   | <i>Equus</i>      | sp. | 933   | 209B  | Herbivore | Non-ruminant | Friesenhahn Cave | Pleistocene | Koch 2004           | enamel   | molar        | -4.1  | -12.9 | NA   | 28.3 | -2.5 | nd  |
| Perissodactyla | Equidae   | <i>Equus</i>      | sp. | 937   | 254   | Herbivore | Non-ruminant | Blackwater Draw  | Pleistocene | Koch 2004           | enamel   | molar        | -5.1  | -13.9 | NA   | 27.9 | -2.9 | nd  |
| Perissodactyla | Equidae   | <i>Equus</i>      | sp. | 937   | 738   | Herbivore | Non-ruminant | Blackwater Draw  | Pleistocene | Koch 2004           | enamel   | cheek tooth  | -6.3  | -15.1 | NA   | 26.2 | -4.5 | nd  |
| Perissodactyla | Equidae   | <i>Equus</i>      | sp. | 1295  | 33    | Herbivore | Non-ruminant | Clamp Cave       | Pleistocene | Present Study       | enamel   | molar or pre | -5.6  | -14.3 | NA   |      | -3.8 | nd  |
| Perissodactyla | Equidae   | <i>Equus</i>      | sp. | 1295  | 36    | Herbivore | Non-ruminant | Clamp Cave       | Pleistocene | Present Study       | enamel   | molar        | -3.7  | -12.5 | NA   | 25.5 | -5.2 | nd  |
| Perissodactyla | Equidae   | <i>Equus</i>      | sp. | 30967 | 36    | Herbivore | Non-ruminant | Ingleside        | Pleistocene | Koch 2004           | enamel   | tooth        | -1.0  | -9.8  | NA   | 29.0 | -1.8 | nd  |
| Perissodactyla | Equidae   | <i>Equus</i>      | sp. | 30967 | 51    | Herbivore | Non-ruminant | Ingleside        | Pleistocene | Yann et al. 2016    | enamel   | tooth        | -3.1  | -11.9 | NA   | 26.9 | -3.8 | nd  |
| Perissodactyla | Equidae   | <i>Equus</i>      | sp. | 30967 | 76    | Herbivore | Non-ruminant | Ingleside        | Pleistocene | Yann et al. 2016    | enamel   | tooth        | -1.0  | -9.8  | NA   | 29.0 | -1.8 | nd  |
| Perissodactyla | Equidae   | <i>Equus</i>      | sp. | 30967 | 223   | Herbivore | Non-ruminant | Ingleside        | Pleistocene | Yann et al. 2016    | enamel   | premolar     | -0.6  | -9.4  | NA   | 26.9 | -3.8 | nd  |
| Perissodactyla | Equidae   | <i>Equus</i>      | sp. | 30967 | 224   | Herbivore | Non-ruminant | Ingleside        | Pleistocene | Present Study       | enamel   | tooth        | -0.8  | -9.6  | NA   |      |      | nd  |
| Perissodactyla | Equidae   | <i>Equus</i>      | sp. | 30967 | 225   | Herbivore | Non-ruminant | Ingleside        | Pleistocene | Yann et al. 2016    | enamel   | tooth        | -1.4  | -10.2 | NA   | 30.4 | -0.4 | nd  |
| Perissodactyla | Equidae   | <i>Equus</i>      | sp. | 30967 | 226   | Herbivore | Non-ruminant | Ingleside        | Pleistocene | Yann et al. 2016    | enamel   | tooth        | -0.8  | -9.6  | NA   | 27.6 | -3.2 | nd  |
| Perissodactyla | Equidae   | <i>Equus</i>      | sp. | 30967 | 229   | Herbivore | Non-ruminant | Ingleside        | Pleistocene | Yann et al. 2016    | enamel   | tooth        | -1.3  | -10.1 | NA   | 30.4 | -0.4 | nd  |
| Perissodactyla | Equidae   | <i>Equus</i>      | sp. | 30967 | 230   | Herbivore | Non-ruminant | Ingleside        | Pleistocene | Yann et al. 2016    | enamel   | premolar or  | -1.2  | -10.0 | NA   | 31.3 | 0.4  | nd  |
| Perissodactyla | Equidae   | <i>Equus</i>      | sp. | 30967 | 241   | Herbivore | Non-ruminant | Ingleside        | Pleistocene | Koch 2004           | enamel   | molar 1 or 2 | -3.7  | -12.5 | NA   | 34.3 | 3.3  | nd  |
| Perissodactyla | Equidae   | <i>Equus</i>      | sp. | 30967 | 242   | Herbivore | Non-ruminant | Ingleside        | Pleistocene | Koch 2004           | enamel   | tooth        | -1.3  | -10.1 | NA   | 30.8 | 0.0  | nd  |
| Perissodactyla | Equidae   | <i>Equus</i>      | sp. | 30967 | 312   | Herbivore | Non-ruminant | Ingleside        | Pleistocene | Koch 2004           | enamel   | premolar     | -2.2  | -10.9 | NA   | 29.0 | -1.8 | nd  |
| Perissodactyla | Equidae   | <i>Equus</i>      | sp. | 30967 | 379   | Herbivore | Non-ruminant | Ingleside        | Pleistocene | Koch 2004           | enamel   | cheek tooth  | -1.0  | -9.8  | NA   | 28.4 | -2.4 | nd  |
| Perissodactyla | Equidae   | <i>Equus</i>      | sp. | 30967 | 454   | Herbivore | Non-ruminant | Ingleside        | Pleistocene | Yann et al. 2016    | enamel   | molar 3      | -3.5  | -12.3 | NA   | 31.6 | 0.7  | nd  |
| Perissodactyla | Equidae   | <i>Equus</i>      | sp. | 30967 | 455   | Herbivore | Non-ruminant | Ingleside        | Pleistocene | Yann et al. 2016    | enamel   | molar 3      | -0.7  | -9.5  | NA   | 29.7 | -1.1 | nd  |
| Perissodactyla | Equidae   | <i>Equus</i>      | sp. | 30967 | 457   | Herbivore | Non-ruminant | Ingleside        | Pleistocene | Yann et al. 2016    | enamel   | molar 3      | -4.0  | -12.8 | NA   | 31.7 | 0.8  | nd  |
| Perissodactyla | Equidae   | <i>Equus</i>      | sp. | 30967 | 487   | Herbivore | Non-ruminant | Ingleside        | Pleistocene | Yann et al. 2016    | enamel   | premolar 4   | -0.7  | -9.5  | NA   | 29.0 | -1.8 | nd  |
| Perissodactyla | Equidae   | <i>Equus</i>      | sp. | 30967 | 518   | Herbivore | Non-ruminant | Ingleside        | Pleistocene | Yann et al. 2016    | enamel   | tooth        | -0.9  | -9.7  | NA   | 30.3 | -0.5 | nd  |
| Perissodactyla | Equidae   | <i>Equus</i>      | sp. | 30967 | 540   | Herbivore | Non-ruminant | Ingleside        | Pleistocene | Yann et al. 2016    | enamel   | premolar 4   | -3.4  | -12.2 | NA   | 31.9 | 1.0  | nd  |
| Perissodactyla | Equidae   | <i>Equus</i>      | sp. | 30967 | 642   | Herbivore | Non-ruminant | Ingleside        | Pleistocene | Yann et al. 2016    | enamel   | molar 3      | -2.8  | -11.6 | NA   | 28.7 | -2.1 | nd  |
| Perissodactyla | Equidae   | <i>Equus</i>      | sp. | 30967 | 708   | Herbivore | Non-ruminant | Ingleside        | Pleistocene | Koch 2004           | enamel   | tooth        | -1.8  | -10.6 | NA   | 28.4 | -2.4 | nd  |
| Perissodactyla | Equidae   | <i>Equus</i>      | sp. | 30967 | 870   | Herbivore | Non-ruminant | Ingleside        | Pleistocene | Yann et al. 2016    | enamel   | molar        | -3.4  | -12.2 | NA   | 30.9 | 0.0  | nd  |
| Perissodactyla | Equidae   | <i>Equus</i>      | sp. | 30967 | 937   | Herbivore | Non-ruminant | Ingleside        | Pleistocene | Yann et al. 2016    | enamel   | molar 3      | -2.9  | -11.7 | NA   | 30.4 | -0.4 | nd  |
| Perissodactyla | Equidae   | <i>Equus</i>      | sp. | 30967 | 948   | Herbivore | Non-ruminant | Ingleside        | Pleistocene | Koch 2004           | enamel   | cheek tooth  | -2.7  | -11.5 | NA   | 28.3 | -2.5 | nd  |
| Perissodactyla | Equidae   | <i>Equus</i>      | sp. | 30967 | 974   | Herbivore | Non-ruminant | Ingleside        | Pleistocene | Koch 2004           | enamel   | molar        | -4.0  | -12.8 | NA   | 28.3 | -2.5 | nd  |
| Perissodactyla | Equidae   | <i>Equus</i>      | sp. | 30967 | 1487  | Herbivore | Non-ruminant | Ingleside        | Pleistocene | Koch 2004           | enamel   | premolar 4   | -0.7  | -9.5  | NA   | 29.0 | -1.8 | nd  |
| Perissodactyla | Equidae   | <i>Equus</i>      | sp. | 30967 | 1518  | Herbivore | Non-ruminant | Ingleside        | Pleistocene | Koch 2004           | enamel   | tooth        | -0.9  | -9.7  | NA   | 30.3 | -0.6 | nd  |
| Perissodactyla | Equidae   | <i>Equus</i>      | sp. | 30967 | 1540  | Herbivore | Non-ruminant | Ingleside        | Pleistocene | Koch 2004           | enamel   | premolar 4   | -3.4  | -12.2 | NA   | 31.9 | 1.0  | nd  |
| Perissodactyla | Equidae   | <i>Equus</i>      | sp. | 30967 | 1642  | Herbivore | Non-ruminant | Ingleside        | Pleistocene | Koch 2004           | enamel   | molar 2      | -2.8  | -11.6 | NA   | 28.7 | -2.1 | nd  |
| Perissodactyla | Equidae   | <i>Equus</i>      | sp. | 30967 | 1870  | Herbivore | Non-ruminant | Ingleside        | Pleistocene | Koch 2004           | enamel   | molar        | -3.5  | -12.2 | NA   | 30.9 | 0.0  | nd  |
| Perissodactyla | Equidae   | <i>Equus</i>      | sp. | 30967 | 2140  | Herbivore | Non-ruminant | Ingleside        | Pleistocene | Present Study       | enamel   | tooth        | -1.9  | -10.7 | NA   |      | -3.2 | nd  |
| Perissodactyla | Equidae   | <i>Equus</i>      | sp. | 30967 | 2223  | Herbivore | Non-ruminant | Ingleside        | Pleistocene | Koch 2004           | enamel   | premolar     | -0.6  | -9.4  | NA   | 26.9 | -3.8 | nd  |
| Perissodactyla | Equidae   | <i>Equus</i>      | sp. | 30967 | 2224  | Herbivore | Non-ruminant | Ingleside        | Pleistocene | Cerling et al. 1999 | enamel   | tooth        | -0.8  | -9.6  | NA   | nd   | nd   | nd  |
| Perissodactyla | Equidae   | <i>Equus</i>      | sp. | 30967 | 2225  | Herbivore | Non-ruminant | Ingleside        | Pleistocene | Koch 2004           | enamel   | tooth        | -1.4  | -10.2 | NA   | 30.4 | -0.5 | nd  |
| Perissodactyla | Equidae   | <i>Equus</i>      | sp. | 30967 | 2226  | Herbivore | Non-ruminant | Ingleside        | Pleistocene | Koch 2004           | enamel   | tooth        | -0.8  | -9.6  | NA   | 27.6 | -3.1 | nd  |
| Perissodactyla | Equidae   | <i>Equus</i>      | sp. | 30967 | 2229  | Herbivore | Non-ruminant | Ingleside        | Pleistocene | Koch 2004           | enamel   | tooth        | -1.3  | -10.0 | NA   | 30.4 | -0.5 | nd  |
| Perissodactyla | Equidae   | <i>Equus</i>      | sp. | 30967 | 2230  | Herbivore | Non-ruminant | Ingleside        | Pleistocene | Koch 2004           | enamel   | cheek tooth  | -1.2  | -10.0 | NA   | 31.3 | 0.4  | nd  |
| Perissodactyla | Equidae   | <i>Equus</i>      | sp. | 30967 | 2232  | Herbivore | Non-ruminant | Ingleside        | Pleistocene | Present Study       | enamel   | tooth        | -1.4  | -10.2 | NA   | 30.3 | -0.5 | nd  |
| Perissodactyla | Equidae   | <i>Equus</i>      | sp. | 30967 | 2235  | Herbivore | Non-ruminant | Ingleside        | Pleistocene | Present Study       | enamel   | tooth        | -3.3  | -12.1 | NA   |      | 0.2  | nd  |
| Perissodactyla | Equidae   | <i>Equus</i>      | sp. | 30967 | 2239  | Herbivore | Non-ruminant | Ingleside        | Pleistocene | Present Study       | enamel   | tooth        | -10.1 | -18.9 | NA   | 27.2 | -3.6 | nd  |
| Perissodactyla | Equidae   | <i>Equus</i>      | sp. | 30967 | 2455  | Herbivore | Non-ruminant | Ingleside        | Pleistocene | Koch 2004           | enamel   | molar 3      | -0.7  | -9.5  | NA   | 29.7 | -1.2 | nd  |
| Perissodactyla | Equidae   | <i>Equus</i>      | sp. | 30967 | 1051A | Herbivore | Non-ruminant | Ingleside        | Pleistocene | Koch 2004           | enamel   | tooth        | -3.3  | -12.1 | NA   | 26.8 | -4.0 | nd  |
| Perissodactyla | Equidae   | <i>Equus</i>      | sp. | 30967 | 1051B | Herbivore | Non-ruminant | Ingleside        | Pleistocene | Koch 2004           | enamel   | tooth        | -2.8  | -11.6 | NA   | 27.0 | -3.8 | nd  |
| Perissodactyla | Equidae   | <i>Equus</i>      | sp. | 30967 | 1540a | Herbivore | Non-ruminant | Ingleside        | Pleistocene | Present Study       | enamel   | tooth        | -3.4  | -12.2 | NA   | 27.5 | -3.2 | nd  |
| Perissodactyla | Equidae   | <i>Equus</i>      | sp. | 30967 | 376A  | Herbivore | Non-ruminant | Ingleside        | Pleistocene | Koch 2004           | enamel   | tooth        | -1.4  | -10.2 | NA   | 29.1 | -1.7 | nd  |
| Perissodactyla | Equidae   | <i>Equus</i>      | sp. | 30967 | 376B  | Herbivore | Non-ruminant | Ingleside        | Pleistocene | Koch 2004           | enamel   | tooth        | -0.7  | -9.5  | NA   | 28.0 | -2.8 | nd  |
| Perissodactyla | Equidae   | <i>Equus</i>      | sp. | 30967 | 376C  | Herbivore | Non-ruminant | Ingleside        | Pleistocene | Koch 2004           | enamel   | tooth        | -0.8  | -9.6  | NA   | 29.8 | -1.0 | nd  |
| Perissodactyla | Equidae   | <i>Equus</i>      | sp. | 31030 | 27    | Herbivore | Non-ruminant | Valley Farms     | Pleistocene | Koch 2004           | enamel   | premolar 3 c | -5.9  | -14.7 | NA   | 28.3 | -2.5 | nd  |
| Perissodactyla | Equidae   | <i>Equus</i>      | sp. | 31030 | 28    | Herbivore | Non-ruminant | Valley Farms     | Pleistocene | Koch 2004           | enamel   | premolar 3 c | -6.9  | -15.7 | NA   | 31.1 | 0.2  | nd  |
| Perissodactyla | Equidae   | <i>Equus</i>      | sp. | 40685 | 2260  | Herbivore | Non-ruminant | Zesch Cave       | Pleistocene | Present Study       | enamel   | tooth        | -5.9  | -14.6 | NA   |      | -2.8 | nd  |
| Perissodactyla | Equidae   | <i>Equus</i>      | sp. | 41229 | 520   | Herbivore | Non-ruminant | Hall's Cave      | Pleistocene | Present Study       | collagen | pelvis       | -1    |       |      |      |      |     |

|                |              |                    |                   |       |         |           |              |                  |             |                     |          |                |       |       |     |      |      |     |
|----------------|--------------|--------------------|-------------------|-------|---------|-----------|--------------|------------------|-------------|---------------------|----------|----------------|-------|-------|-----|------|------|-----|
| Perissodactyla | Equidae      | <i>Equus</i>       | <i>sp.</i>        | MSU   | 2819    | Herbivore | Non-ruminant | Quitaque Creek   | Pleistocene | Koch 2004           | enamel   | molar 3        | -2.5  | -11.3 | NA  | 27.7 | -3.1 | nd  |
| Perissodactyla | Equidae      | <i>Equus</i>       | <i>sp.</i>        | MSU   | 3016    | Herbivore | Non-ruminant | Howard Ranch     | Pleistocene | Koch 2004           | enamel   | cheek tooth    | -3.1  | -11.9 | NA  | 28.0 | -2.8 | nd  |
| Perissodactyla | Equidae      | <i>Equus</i>       | <i>sp.</i>        | no    | number  | Herbivore | Non-ruminant | Waco Mammoth Sit | Pleistocene | Koch 2004           | enamel   | cheek tooth    | -4.7  | -13.5 | NA  | 30.3 | -0.5 | nd  |
| Perissodactyla | Equidae      | <i>Equus</i>       | <i>sp.</i>        | SMP   | 60124   | Herbivore | Non-ruminant | Moore.Pit        | Pleistocene | Koch 2004           | enamel   | molar 2        | -6.5  | -15.3 | NA  | 28.7 | -2.1 | nd  |
| Perissodactyla | Equidae      | <i>Equus</i>       | <i>sp.</i>        | SMP   | 60130   | Herbivore | Non-ruminant | Moore.Pit        | Pleistocene | Koch 2004           | enamel   | molar 1        | -3.9  | -12.7 | NA  | 32.0 | 1.1  | nd  |
| Perissodactyla | Equidae      | <i>Equus</i>       | <i>sp.</i>        | SMP   | 60188   | Herbivore | Non-ruminant | Moore.Pit        | Pleistocene | Koch 2004           | enamel   | cheek tooth    | -7.4  | -16.2 | NA  | 30.8 | 0.0  | nd  |
| Perissodactyla | Equidae      | <i>Equus</i>       | <i>sp.</i>        | SMP   | 60240   | Herbivore | Non-ruminant | Moore.Pit        | Pleistocene | Koch 2004           | enamel   | molar 2        | -5.0  | -13.8 | NA  | 30.2 | -0.7 | nd  |
| Perissodactyla | Equidae      | <i>Equus</i>       | <i>sp.</i>        | SMP   | 60292   | Herbivore | Non-ruminant | Coppell          | Pleistocene | Koch 2004           | enamel   | remolar 3 or 4 | -4.3  | -13.1 | NA  | 29.9 | -0.9 | nd  |
| Perissodactyla | Equidae      | <i>Equus</i>       | <i>sp.</i>        | SMP   | 60442   | Herbivore | Non-ruminant | Coppell          | Pleistocene | Koch 2004           | enamel   | remolar 3 or 4 | -4.6  | -13.4 | NA  | 30.6 | -0.3 | nd  |
| Perissodactyla | Equidae      | <i>Equus</i>       | <i>sp.</i>        | SMP   | 60531   | Herbivore | Non-ruminant | Clear Creek      | Pleistocene | Koch 2004           | enamel   | premolar       | -5.3  | -14.1 | NA  | 30.4 | -0.5 | nd  |
| Perissodactyla | Equidae      | <i>Equus</i>       | <i>sp.</i>        | SMP   | 60731   | Herbivore | Non-ruminant | Ben Franklin     | Pleistocene | Koch 2004           | enamel   | molar          | -6.3  | -15.1 | NA  | 28.8 | -2.0 | nd  |
| Perissodactyla | Equidae      | <i>Equus</i>       | <i>sp.</i>        | SMP   | 60827   | Herbivore | Non-ruminant | Clear Creek      | Pleistocene | Koch 2004           | enamel   | molar          | -7.1  | -15.9 | NA  | 27.8 | -3.0 | nd  |
| Perissodactyla | Equidae      | <i>Equus</i>       | <i>sp.</i>        | SMP   | 60840   | Herbivore | Non-ruminant | Clear Creek      | Pleistocene | Koch 2004           | enamel   | molar 3        | -4.7  | -13.5 | NA  | 32.3 | 1.4  | nd  |
| Perissodactyla | Equidae      | <i>Equus</i>       | <i>sp.</i>        | SMP   | 60855   | Herbivore | Non-ruminant | Moore.Pit        | Pleistocene | Koch 2004           | enamel   | molar 2        | -4.9  | -13.7 | NA  | 30.2 | -0.7 | nd  |
| Perissodactyla | Equidae      | <i>Equus</i>       | <i>sp.</i>        | SMP   | 61236   | Herbivore | Non-ruminant | Ben Franklin     | Pleistocene | Koch 2004           | enamel   | molar          | -3.5  | -12.3 | NA  | 27.1 | -3.6 | nd  |
| Perissodactyla | Equidae      | <i>Equus</i>       | <i>sp.</i>        | SMP   | 61245   | Herbivore | Non-ruminant | Ben Franklin     | Pleistocene | Koch 2004           | enamel   | cheek tooth    | -6.1  | -14.8 | NA  | 28.6 | -2.2 | nd  |
| Perissodactyla | Equidae      | <i>Equus</i>       | <i>sp.</i>        | SMP   | 61246   | Herbivore | Non-ruminant | Ben Franklin     | Pleistocene | Koch 2004           | enamel   | cheek tooth    | -2.9  | -11.7 | NA  | 31.6 | 0.7  | nd  |
| Perissodactyla | Equidae      | <i>Equus</i>       | <i>sp.</i>        | SMP   | 60382ms | Herbivore | Non-ruminant | Clear Creek      | Pleistocene | Koch 2004           | enamel   | molar          | -5.9  | -14.7 | NA  | 29.6 | -1.3 | nd  |
| Perissodactyla | Equidae      | <i>Equus</i>       | <i>sp.</i>        | 908   | 2362    | Herbivore | Non-ruminant | Kincaid Shelter  | Pleistocene | Present Study       | collagen | dentary        | -27.7 | nd    | bdl | nd   | nd   | nd  |
| Perissodactyla | Equidae      | <i>Equus</i>       | <i>sp.</i>        | 908   | 2364    | Herbivore | Non-ruminant | Kincaid Shelter  | Pleistocene | Present Study       | collagen | dentary        | bdl   | nd    | bdl | nd   | nd   | nd  |
| Perissodactyla | Equidae      | <i>Equus</i>       | <i>sp.</i>        | 908   | 2398    | Herbivore | Non-ruminant | Kincaid Shelter  | Pleistocene | Present Study       | collagen | phalanx        | bdl   | nd    | bdl | nd   | nd   | nd  |
| Perissodactyla | Equidae      | <i>Equus</i>       | <i>sp.</i>        | 908   | 2334    | Herbivore | Non-ruminant | Kincaid Shelter  | Pleistocene | Present Study       | collagen | skull          | bdl   | nd    | bdl | nd   | nd   | nd  |
| Perissodactyla | Equidae      | <i>Equus</i>       | <i>sp.</i>        | 30967 | 2223b   | Herbivore | Non-ruminant | Ingleside        | Pleistocene | Present Study       | enamel   | tooth          | -1.7  | -10.5 | NA  | 28.3 | -2.5 | nd  |
| Perissodactyla | Tapiridae    | <i>Tapirus</i>     | <i>veroensis</i>  | 804   | 84      | Herbivore | Non-ruminant | Montell Shelter  | Pleistocene | Present Study       | enamel   | tooth          | -11.4 | -20.2 | NA  | nd   | -6.8 | nd  |
| Perissodactyla | Tapiridae    | <i>Tapirus</i>     | <i>veroensis</i>  | 933   | 973     | Herbivore | Non-ruminant | Friesenhahn Cave | Pleistocene | Present Study       | enamel   | premolar 3     | -10.5 | -19.3 | NA  | nd   | -6.0 | nd  |
| Perissodactyla | Tapiridae    | <i>Tapirus</i>     | <i>veroensis</i>  | 30967 | 74      | Herbivore | Non-ruminant | Ingleside        | Pleistocene | Yann et al. 2016    | enamel   | molar 2        | -12.3 | -21.1 | NA  | 31.3 | 0.4  | nd  |
| Perissodactyla | Tapiridae    | <i>Tapirus</i>     | <i>veroensis</i>  | 30967 | 89      | Herbivore | Non-ruminant | Ingleside        | Pleistocene | Yann et al. 2016    | enamel   | tooth          | -11.7 | -20.5 | NA  | 30.0 | -0.8 | nd  |
| Perissodactyla | Tapiridae    | <i>Tapirus</i>     | <i>veroensis</i>  | 30967 | 176     | Herbivore | Non-ruminant | Ingleside        | Pleistocene | Yann et al. 2016    | enamel   | tooth          | -11.6 | -20.4 | NA  | 29.4 | -1.4 | nd  |
| Perissodactyla | Tapiridae    | <i>Tapirus</i>     | <i>veroensis</i>  | 30967 | 222     | Herbivore | Non-ruminant | Ingleside        | Pleistocene | Yann et al. 2016    | enamel   | molar          | -11.3 | -20.1 | NA  | 30.6 | -0.3 | nd  |
| Perissodactyla | Tapiridae    | <i>Tapirus</i>     | <i>veroensis</i>  | 30967 | 281     | Herbivore | Non-ruminant | Ingleside        | Pleistocene | Yann et al. 2016    | enamel   | molar 2        | -10.6 | -19.4 | NA  | 30.1 | -0.7 | nd  |
| Pilosa         | Mylodontidae | <i>Paramyiodon</i> | <i>harlani</i>    | 908   | 2304    | Herbivore | Non-ruminant | Kincaid Shelter  | Pleistocene | Present Study       | collagen | phalanx        | bdl   | nd    | bdl | nd   | nd   | nd  |
| Proboscidea    | Elephantidae | <i>Mammot</i>      | <i>americanum</i> | 933   | 674     | Herbivore | Non-ruminant | Friesenhahn Cave | Pleistocene | Present Study       | collagen | bone           | -24.7 | -24.7 | 2.7 | 2.7  | 2.7  | 2.7 |
| Proboscidea    | Elephantidae | <i>Mammot</i>      | <i>americanum</i> | 933   | 3532    | Herbivore | Non-ruminant | Kincaid Shelter  | Pleistocene | Present Study       | collagen | n/a            | -17.0 | -17.0 | 6.9 | 6.9  | 6.9  | 6.9 |
| Proboscidea    | Elephantidae | <i>Mammot</i>      | <i>americanum</i> | 30967 | 50      | Herbivore | Non-ruminant | Ingleside        | Pleistocene | Yann et al. 2016    | enamel   | molar 3        | -10.4 | -19.2 | NA  | 30.1 | -0.7 | nd  |
| Proboscidea    | Elephantidae | <i>Mammot</i>      | <i>americanum</i> | 30967 | 156     | Herbivore | Non-ruminant | Ingleside        | Pleistocene | Present Study       | enamel   | tooth          | -10.3 | -19.1 | NA  | nd   | -1.9 | nd  |
| Proboscidea    | Elephantidae | <i>Mammot</i>      | <i>americanum</i> | 30967 | 205     | Herbivore | Non-ruminant | Ingleside        | Pleistocene | Present Study       | enamel   | tooth          | -9.4  | -18.2 | NA  | nd   | -3.8 | nd  |
| Proboscidea    | Elephantidae | <i>Mammot</i>      | <i>americanum</i> | 30967 | 247     | Herbivore | Non-ruminant | Ingleside        | Pleistocene | Yann et al. 2016    | enamel   | molar          | -11.2 | -20.0 | NA  | 31.7 | 0.8  | nd  |
| Proboscidea    | Elephantidae | <i>Mammot</i>      | <i>americanum</i> | 30967 | 257     | Herbivore | Non-ruminant | Ingleside        | Pleistocene | Yann et al. 2016    | enamel   | molar 3        | -11.0 | -19.8 | NA  | 30.2 | -0.6 | nd  |
| Proboscidea    | Elephantidae | <i>Mammot</i>      | <i>americanum</i> | 30967 | 321     | Herbivore | Non-ruminant | Ingleside        | Pleistocene | Present Study       | enamel   | tooth          | -10.2 | -19.0 | NA  | 28.4 | -2.4 | nd  |
| Proboscidea    | Elephantidae | <i>Mammot</i>      | <i>americanum</i> | 30967 | 321     | Herbivore | Non-ruminant | Ingleside        | Pleistocene | Present Study       | enamel   | tooth          | -10.0 | -18.8 | NA  | nd   | -1.6 | nd  |
| Proboscidea    | Elephantidae | <i>Mammot</i>      | <i>americanum</i> | 30967 | 339     | Herbivore | Non-ruminant | Ingleside        | Pleistocene | Yann et al. 2016    | enamel   | molar 3        | -10.7 | -19.5 | NA  | 29.8 | -1.0 | nd  |
| Proboscidea    | Elephantidae | <i>Mammot</i>      | <i>americanum</i> | 30967 | 341     | Herbivore | Non-ruminant | Ingleside        | Pleistocene | Present Study       | enamel   | tooth          | -9.5  | -18.3 | NA  | nd   | -1.7 | nd  |
| Proboscidea    | Elephantidae | <i>Mammot</i>      | <i>americanum</i> | 30967 | 351     | Herbivore | Non-ruminant | Ingleside        | Pleistocene | Yann et al. 2016    | enamel   | tooth          | -9.5  | -18.3 | NA  | 29.6 | -1.2 | nd  |
| Proboscidea    | Elephantidae | <i>Mammot</i>      | <i>americanum</i> | 30967 | 352     | Herbivore | Non-ruminant | Ingleside        | Pleistocene | Yann et al. 2016    | enamel   | molar 3        | -10.1 | -18.9 | NA  | 30.7 | -0.2 | nd  |
| Proboscidea    | Elephantidae | <i>Mammot</i>      | <i>americanum</i> | 30967 | 395     | Herbivore | Non-ruminant | Ingleside        | Pleistocene | Cerling et al. 1999 | enamel   | tooth          | -10.6 | -19.4 | NA  | nd   | nd   | nd  |
| Proboscidea    | Elephantidae | <i>Mammot</i>      | <i>americanum</i> | 30967 | 470     | Herbivore | Non-ruminant | Ingleside        | Pleistocene | Yann et al. 2016    | enamel   | molar          | -12.0 | -20.8 | NA  | 31.2 | 0.3  | nd  |
| Proboscidea    | Elephantidae | <i>Mammot</i>      | <i>americanum</i> | 30967 | 525     | Herbivore | Non-ruminant | Ingleside        | Pleistocene | Yann et al. 2016    | enamel   | molar          | -11.9 | -20.7 | NA  | 30.8 | -0.1 | nd  |
| Proboscidea    | Elephantidae | <i>Mammot</i>      | <i>americanum</i> | 30967 | 591     | Herbivore | Non-ruminant | Ingleside        | Pleistocene | Present Study       | enamel   | molar 3        | -9.9  | -18.7 | NA  | 30.3 | -0.5 | nd  |
| Proboscidea    | Elephantidae | <i>Mammot</i>      | <i>americanum</i> | 30967 | 591     | Herbivore | Non-ruminant | Ingleside        | Pleistocene | Yann et al. 2016    | enamel   | molar 3        | -9.9  | -18.7 | NA  | 30.3 | -0.5 | nd  |
| Proboscidea    | Elephantidae | <i>Mammot</i>      | <i>americanum</i> | 30967 | 593     | Herbivore | Non-ruminant | Ingleside        | Pleistocene | Yann et al. 2016    | enamel   | molar          | -11.1 | -19.9 | NA  | 31.7 | 0.8  | nd  |
| Proboscidea    | Elephantidae | <i>Mammot</i>      | <i>americanum</i> | 30967 | 606     | Herbivore | Non-ruminant | Ingleside        | Pleistocene | Yann et al. 2016    | enamel   | molar          | -12.5 | -21.3 | NA  | 30.6 | -0.3 | nd  |
| Proboscidea    | Elephantidae | <i>Mammot</i>      | <i>americanum</i> | 30967 | 650     | Herbivore | Non-ruminant | Ingleside        | Pleistocene | Yann et al. 2016    | enamel   | molar 1        | -10.7 | -19.5 | NA  | 29.6 | -1.2 | nd  |
| Proboscidea    | Elephantidae | <i>Mammot</i>      | <i>americanum</i> | 30967 | 672     | Herbivore | Non-ruminant | Ingleside        | Pleistocene | Yann et al. 2016    | enamel   | molar          | -12.6 | -21.4 | NA  | 30.6 | -0.3 | nd  |
| Proboscidea    | Elephantidae | <i>Mammot</i>      | <i>americanum</i> | 30967 | 727     | Herbivore | Non-ruminant | Ingleside        | Pleistocene | Yann et al. 2016    | enamel   | molar          | -11.7 | -20.5 | NA  | 30.4 | -0.4 | nd  |
| Proboscidea    | Elephantidae | <i>Mammot</i>      | <i>americanum</i> | 30967 | 728     | Herbivore | Non-ruminant | Ingleside        | Pleistocene | Yann et al. 2016    | enamel   | molar 3        | -10.5 | -19.3 | NA  | 30.9 | 0.0  | nd  |
| Proboscidea    | Elephantidae | <i>Mammot</i>      | <i>americanum</i> | 30967 | 766     | Herbivore | Non-ruminant | Ingleside        | Pleistocene | Yann et al. 2016    | enamel   | molar 2        | -10.8 | -19.6 | NA  | 29.2 | -1.6 | nd  |
| Proboscidea    | Elephantidae | <i>Mammot</i>      | <i>americanum</i> | 30967 | 773     | Herbivore | Non-ruminant | Ingleside        | Pleistocene | Present Study       | enamel   | tooth          | -10.1 | -18.9 | NA  | nd   | -2.6 | nd  |
| Proboscidea    | Elephantidae | <i>Mammot</i>      | <i>americanum</i> | 30967 | 899     | Herbivore | Non-ruminant | Ingleside        | Pleistocene | Yann et al. 2016    | enamel   | molar          | -12.4 | -21.2 | NA  | 28.6 | -2.2 | nd  |
| Proboscidea    | Elephantidae | <i>Mammot</i>      | <i>americanum</i> | 30967 | 906     | Herbivore | Non-ruminant | Ingleside        | Pleistocene | Yann et al. 2016    | enamel   | molar 3        | -10.6 | -19.4 | NA  | 28.5 | -2.3 | nd  |
| Proboscidea    | Elephantidae | <i>Mammot</i>      | <i>americanum</i> | 30967 | 980     | Herbivore | Non-ruminant | Ingleside        | Pleistocene | Yann et al. 2016    | enamel   | molar 2        | -11.4 | -20.2 | NA  | 29.0 | -1.8 | nd  |
| Proboscidea    | Elephantidae | <i>Mammot</i>      | <i>americanum</i> | 30967 | 1922    | Herbivore | Non-ruminant | Ingleside        | Pleistocene | Present Study       | enamel   | tooth          | -7.2  | -16.0 | NA  | 0.0  | nd   | nd  |
| Proboscidea    | Elephantidae | <i>Mammot</i>      | <i>americanum</i> | 40450 | 1       | Herbivore | Non-ruminant | Wing Avenue      | Pleistocene | Present Study       | collagen | maxilla        | -20.0 | -20.0 | 4.5 | 3.0  | 3.0  | 3.0 |
| Proboscidea    | Elephantidae | <i>Mammot</i>      | <i>americanum</i> | 43067 | 39      | Herbivore | Non-ruminant | Congress Avenue  | Pleistocene | Present Study       | enamel   | molar 2        | -10.6 | -19.4 | NA  | nd   | -6.1 | nd  |
| Proboscidea    | Elephantidae | <i>Mammot</i>      | <i>americanum</i> | 43067 | 103     | Herbivore | Non-ruminant | Congress Avenue  | Pleistocene | Present Study       | enamel   | molar          | -10.2 | -18.9 | NA  | nd   | -5.0 | nd  |
| Proboscidea    | Elephantidae | <i>Mammot</i>      | <i>americanum</i> | 43067 | 104     | Herbivore | Non-ruminant | Congress Avenue  | Pleistocene | Present Study       | enamel   | molar 3        | -9.9  | -18.7 | NA  | nd   | -4.5 | nd  |
| Proboscidea    | Elephantidae | <i>Mammot</i>      | <i>americanum</i> | 908   | 2302    | Herbivore | Non-ruminant | Kincaid Shelter  | Pleistocene | Present Study       | collagen | rib            | -25.6 | nd    | 3.1 | 4.7  | 4.7  | 4.7 |
| Proboscidea    | Elephantidae | <i>Mammot</i>      | <i>americanum</i> | 908   | 2305    | Herbivore | Non-ruminant | Kincaid Shelter  | Pleistocene | Present Study       | collagen | dentary        | -25.0 | nd    | 2.3 | 4.2  | 4.2  | 4.2 |
| Proboscidea    | Elephantidae | <i>Mammuthus</i>   | <i>sp.</i>        | 908   | 2377    | Herbivore | Non-ruminant | Kincaid Shelter  | Pleistocene | Present Study       | enamel   | tooth          | -1.8  | -10.6 | NA  | 29.0 | -1.8 | nd  |
| Proboscidea    | Elephantidae | <i>Mammuthus</i>   | <i>sp.</i>        | 908   | 2408    | Herbivore | Non-ruminant | Kincaid Shelter  | Pleistocene | Koch 2004           | enamel   | cheek tooth    | -1.8  | -10.6 | NA  | 30.1 | -0.8 | nd  |
| Proboscidea    | Elephantidae | <i>Mammuthus</i>   | <i>sp.</i>        | 933   | 133     | Herbivore | Non-ruminant | Friesenhahn Cave | Pleistocene | Koch 2004           | enamel   | molar 2 or 3   | -5.1  | -13.9 | NA  | 29.9 | -0.9 | nd  |
| Proboscidea    | Elephantidae | <i>Mammuthus</i>   | <i>sp.</i>        | 933   | 296     | Herbivore | Non-ruminant | Friesenhahn Cave | Pleistocene | Koch 2004           | enamel   | molar 2 or 3   | -1.5  | -10.3 | NA  | 30.0 | -0.8 | nd  |
| Proboscidea    | Elephantidae | <i>Mammuthus</i>   | <i>sp.</i>        | 933   | 358     | Herbivore | Non-ruminant | Friesenhahn Cave | Pleistocene | Koch 2004           | enamel   | molar 2 or 3   | -1.4  | -10.2 | NA  | 29.1 | -1.8 | nd  |
| Proboscidea    | Elephantidae | <i>Mammuthus</i>   | <i>sp.</i>        | 933   | 928     | Herbivore | Non-ruminant | Friesenhahn Cave | Pleistocene | Koch 2004           | enamel   | cheek tooth    | -2.1  | -10.9 | NA  | 29.3 | -1.5 | nd  |
| Proboscidea    | Elephantidae | <i>Mammuthus</i>   | <i>sp.</i>        | 933   | 1006    | Herbivore | Non-ruminant | Friesenhahn Cave | Pleistocene | Koch 2004           | enamel   | molar 2 or 3   | -0.1  | -8.9  | NA  | 29.9 | -1.0 | nd  |
| Proboscidea    | Elephantidae | <i>Mammuthus</i>   | <i>sp.</i>        | 933   | 1013    | Herbivore | Non-ruminant | Friesenhahn Cave | Pleistocene | Koch 2004           | enamel   | cheek tooth    | -1.2  | -10.0 | NA  | 30.4 | -0.4 | nd  |
| Prob           |              |                    |                   |       |         |           |              |                  |             |                     |          |                |       |       |     |      |      |     |



|             |                 |                    |            |               |         |           |              |                   |             |                     |          |              |      |       |     |      |      |    |
|-------------|-----------------|--------------------|------------|---------------|---------|-----------|--------------|-------------------|-------------|---------------------|----------|--------------|------|-------|-----|------|------|----|
| Proboscidea | Elephantidae    | <i>Mammuthus</i>   | <i>sp.</i> | 30967         | 148     | Herbivore | Non-ruminant | Ingleside         | Pleistocene | Koch 2004           | enamel   | molar 3      | -2.6 | -11.4 | NA  | 30.0 | -0.9 | nd |
| Proboscidea | Elephantidae    | <i>Mammuthus</i>   | <i>sp.</i> | 30967         | 165     | Herbivore | Non-ruminant | Ingleside         | Pleistocene | Present Study       | enamel   | molar 3      | -1.9 | -10.7 | NA  |      | -1.4 | nd |
| Proboscidea | Elephantidae    | <i>Mammuthus</i>   | <i>sp.</i> | 30967         | 165     | Herbivore | Non-ruminant | Ingleside         | Pleistocene | Koch 2004           | enamel   | molar 3      | -1.6 | -10.4 | NA  | 30.1 | -0.7 | nd |
| Proboscidea | Elephantidae    | <i>Mammuthus</i>   | <i>sp.</i> | 30967         | 214     | Herbivore | Non-ruminant | Ingleside         | Pleistocene | Yann et al. 2016    | enamel   | molar 2 or 3 | -1.0 | -9.8  | NA  | 29.9 | -0.9 | nd |
| Proboscidea | Elephantidae    | <i>Mammuthus</i>   | <i>sp.</i> | 30967         | 227     | Herbivore | Non-ruminant | Ingleside         | Pleistocene | Present Study       | enamel   | molar 3      | -0.8 | -9.6  | NA  |      | 0.5  | nd |
| Proboscidea | Elephantidae    | <i>Mammuthus</i>   | <i>sp.</i> | 30967         | 322     | Herbivore | Non-ruminant | Ingleside         | Pleistocene | Yann et al. 2016    | enamel   | tooth        | 0.2  | -8.6  | NA  | 31.4 | 0.5  | nd |
| Proboscidea | Elephantidae    | <i>Mammuthus</i>   | <i>sp.</i> | 30967         | 500     | Herbivore | Non-ruminant | Ingleside         | Pleistocene | Koch 2004           | enamel   | molar 1 or 2 | -1.4 | -10.1 | NA  | 30.4 | -0.5 | nd |
| Proboscidea | Elephantidae    | <i>Mammuthus</i>   | <i>sp.</i> | 30967         | 679     | Herbivore | Non-ruminant | Ingleside         | Pleistocene | Koch 2004           | enamel   | molar        | -0.8 | -9.6  | NA  | 30.1 | -0.7 | nd |
| Proboscidea | Elephantidae    | <i>Mammuthus</i>   | <i>sp.</i> | 30967         | 711     | Herbivore | Non-ruminant | Ingleside         | Pleistocene | Yann et al. 2016    | enamel   | tooth        | -1.2 | -10.0 | NA  | 31.2 | 0.3  | nd |
| Proboscidea | Elephantidae    | <i>Mammuthus</i>   | <i>sp.</i> | 30967         | 724     | Herbivore | Non-ruminant | Ingleside         | Pleistocene | Yann et al. 2016    | enamel   | molar 2 or 3 | -1.1 | -9.9  | NA  | 29.9 | -0.9 | nd |
| Proboscidea | Elephantidae    | <i>Mammuthus</i>   | <i>sp.</i> | 30967         | 787     | Herbivore | Non-ruminant | Ingleside         | Pleistocene | Yann et al. 2016    | enamel   | molar 3      | -1.1 | -9.9  | NA  | 28.0 | -2.8 | nd |
| Proboscidea | Elephantidae    | <i>Mammuthus</i>   | <i>sp.</i> | 30967         | 808     | Herbivore | Non-ruminant | Ingleside         | Pleistocene | Cerling et al. 1999 | enamel   | tooth        | -0.9 | -9.7  | NA  | nd   | nd   | nd |
| Proboscidea | Elephantidae    | <i>Mammuthus</i>   | <i>sp.</i> | 30967         | 818     | Herbivore | Non-ruminant | Ingleside         | Pleistocene | Yann et al. 2016    | enamel   | molar 3      | -2.3 | -11.1 | NA  | 28.5 | -2.3 | nd |
| Proboscidea | Elephantidae    | <i>Mammuthus</i>   | <i>sp.</i> | 30967         | 1214    | Herbivore | Non-ruminant | Ingleside         | Pleistocene | Present Study       | enamel   | molar 2 or 3 | -1.6 | -10.3 | NA  |      | -2.2 | nd |
| Proboscidea | Elephantidae    | <i>Mammuthus</i>   | <i>sp.</i> | 30967         | 1214    | Herbivore | Non-ruminant | Ingleside         | Pleistocene | Koch 2004           | enamel   | molar 3      | -1.0 | -9.7  | NA  | 29.9 | -1.0 | nd |
| Proboscidea | Elephantidae    | <i>Mammuthus</i>   | <i>sp.</i> | 30967         | 1273    | Herbivore | Non-ruminant | Ingleside         | Pleistocene | Present Study       | enamel   | tooth        | -1.9 | -10.7 | NA  |      | -0.7 | nd |
| Proboscidea | Elephantidae    | <i>Mammuthus</i>   | <i>sp.</i> | 30967         | 1273    | Herbivore | Non-ruminant | Ingleside         | Pleistocene | Present Study       | enamel   | tooth        | -1.7 | -10.5 | NA  | 29.4 | -1.4 | nd |
| Proboscidea | Elephantidae    | <i>Mammuthus</i>   | <i>sp.</i> | 30967         | 1724    | Herbivore | Non-ruminant | Ingleside         | Pleistocene | Koch 2004           | enamel   | molar 2 or 3 | -1.1 | -9.9  | NA  | 29.9 | -0.9 | nd |
| Proboscidea | Elephantidae    | <i>Mammuthus</i>   | <i>sp.</i> | 30967         | 1787    | Herbivore | Non-ruminant | Ingleside         | Pleistocene | Koch 2004           | enamel   | molar 3      | -1.1 | -9.9  | NA  | 28.0 | -2.7 | nd |
| Proboscidea | Elephantidae    | <i>Mammuthus</i>   | <i>sp.</i> | 30967         | 1818    | Herbivore | Non-ruminant | Ingleside         | Pleistocene | Koch 2004           | enamel   | molar 3      | -2.3 | -11.0 | NA  | 28.6 | -2.2 | nd |
| Proboscidea | Elephantidae    | <i>Mammuthus</i>   | <i>sp.</i> | 31030         | 3       | Herbivore | Non-ruminant | Valley Farms      | Pleistocene | Koch 2004           | enamel   | premolar 2 c | -7.6 | -16.4 | NA  | 26.2 | -4.5 | nd |
| Proboscidea | Elephantidae    | <i>Mammuthus</i>   | <i>sp.</i> | 31030         | 8       | Herbivore | Non-ruminant | Valley Farms      | Pleistocene | Koch 2004           | enamel   | molar 2 or 3 | -3.1 | -11.9 | NA  | 28.0 | -2.7 | nd |
| Proboscidea | Elephantidae    | <i>Mammuthus</i>   | <i>sp.</i> | 40529         | 9       | Herbivore | Non-ruminant | E & A Gravel Pit  | Pleistocene | Present Study       | enamel   | molar        | -1.2 | -9.9  | NA  |      | -3.3 | nd |
| Proboscidea | Elephantidae    | <i>Mammuthus</i>   | <i>sp.</i> | 40545         | 17      | Herbivore | Non-ruminant | Nueces River      | Pleistocene | Present Study       | enamel   | molar 3      | -1.4 | -10.2 | NA  |      | -0.1 | nd |
| Proboscidea | Elephantidae    | <i>Mammuthus</i>   | <i>sp.</i> | 40722         | 1       | Herbivore | Non-ruminant | Laubach Cave      | Pleistocene | Koch 2004           | enamel   | cheek tooth  | -3.0 | -11.8 | NA  | 30.2 | -0.6 | nd |
| Proboscidea | Elephantidae    | <i>Mammuthus</i>   | <i>sp.</i> | 40806         | 433     | Herbivore | Non-ruminant | Bonfire Shelter   | Pleistocene | Koch 2004           | enamel   | premolar 4   | -2.8 | -11.6 | NA  | 29.5 | -1.3 | nd |
| Proboscidea | Elephantidae    | <i>Mammuthus</i>   | <i>sp.</i> | 43067         | 37      | Herbivore | Non-ruminant | Congress Avenue   | Pleistocene | Koch 2004           | enamel   | tooth        | -1.0 | -9.8  | NA  | 28.7 | -2.1 | nd |
| Proboscidea | Elephantidae    | <i>Mammuthus</i>   | <i>sp.</i> | 43067         | 37      | Herbivore | Non-ruminant | Congress Avenue   | Pleistocene | Present Study       | enamel   | molar 2 or 3 | -1.0 | -9.8  | NA  | 28.7 | -2.1 | nd |
| Proboscidea | Elephantidae    | <i>Mammuthus</i>   | <i>sp.</i> | 43442         | 1       | Herbivore | Non-ruminant | In The Glass Ca   | Pleistocene | Present Study       | enamel   | tooth        | -1.6 | -10.4 | NA  |      | -3.5 | nd |
| Proboscidea | Elephantidae    | <i>Mammuthus</i>   | <i>sp.</i> | BDM           | #4      | Herbivore | Non-ruminant | Blackwater Draw   | Pleistocene | Koch 2004           | enamel   | tooth        | 0.3  | -8.5  | NA  | 24.2 | -6.5 | nd |
| Proboscidea | Elephantidae    | <i>Mammuthus</i>   | <i>sp.</i> | BDM           | na      | Herbivore | Non-ruminant | Blackwater Draw   | Pleistocene | Koch 2004           | enamel   | tooth        | -1.9 | -10.7 | NA  | 29.9 | -0.9 | nd |
| Proboscidea | Elephantidae    | <i>Mammuthus</i>   | <i>sp.</i> | BDM           | na      | Herbivore | Non-ruminant | Blackwater Draw   | Pleistocene | Koch 2004           | enamel   | tooth        | -1.6 | -10.4 | NA  | 29.8 | -1.0 | nd |
| Proboscidea | Elephantidae    | <i>Mammuthus</i>   | <i>sp.</i> | BDM           | na      | Herbivore | Non-ruminant | Blackwater Draw   | Pleistocene | Koch 2004           | enamel   | tooth        | -0.8 | -9.6  | NA  | 27.6 | -3.2 | nd |
| Proboscidea | Elephantidae    | <i>Mammuthus</i>   | <i>sp.</i> | MSU           | 7391    | Herbivore | Non-ruminant | Schulze Cave      | Pleistocene | Koch 2004           | enamel   | premolar     | -4.2 | -13.0 | NA  | 29.1 | -1.7 | nd |
| Proboscidea | Elephantidae    | <i>Mammuthus</i>   | <i>sp.</i> | MSU           | uncat.  | Herbivore | Non-ruminant | Easily.Ranch      | Pleistocene | Koch 2004           | enamel   | cheek tooth  | -0.8 | -9.6  | NA  | 30.2 | -0.7 | nd |
| Proboscidea | Elephantidae    | <i>Mammuthus</i>   | <i>sp.</i> | SMNH          | WACO-12 | Herbivore | Non-ruminant | Vaco Mammoth Sit  | Pleistocene | Koch 2004           | enamel   | cheek tooth  | -2.8 | -11.6 | NA  | 30.6 | -0.3 | nd |
| Proboscidea | Elephantidae    | <i>Mammuthus</i>   | <i>sp.</i> | SMNH          | WACO-19 | Herbivore | Non-ruminant | Vaco Mammoth Sit  | Pleistocene | Koch 2004           | enamel   | cheek tooth  | -2.3 | -11.1 | NA  | 30.1 | -0.7 | nd |
| Proboscidea | Elephantidae    | <i>Mammuthus</i>   | <i>sp.</i> | SMNH          | WACO-21 | Herbivore | Non-ruminant | Vaco Mammoth Sit  | Pleistocene | Koch 2004           | enamel   | cheek tooth  | -2.2 | -11.0 | NA  | 30.7 | -0.2 | nd |
| Proboscidea | Elephantidae    | <i>Mammuthus</i>   | <i>sp.</i> | SMNH          | WACO-23 | Herbivore | Non-ruminant | Vaco Mammoth Sit  | Pleistocene | Koch 2004           | enamel   | cheek tooth  | -4.6 | -13.4 | NA  | 29.8 | -1.0 | nd |
| Proboscidea | Elephantidae    | <i>Mammuthus</i>   | <i>sp.</i> | SMNH          | WACO-B  | Herbivore | Non-ruminant | Vaco Mammoth Sit  | Pleistocene | Koch 2004           | enamel   | cheek tooth  | -1.8 | -10.5 | NA  | 30.4 | -0.4 | nd |
| Proboscidea | Elephantidae    | <i>Mammuthus</i>   | <i>sp.</i> | SMNH          | WACO-C  | Herbivore | Non-ruminant | Vaco Mammoth Sit  | Pleistocene | Koch 2004           | enamel   | cheek tooth  | -2.5 | -11.2 | NA  | 30.0 | -0.9 | nd |
| Proboscidea | Elephantidae    | <i>Mammuthus</i>   | <i>sp.</i> | SMNH          | WACO-D  | Herbivore | Non-ruminant | Vaco Mammoth Sit  | Pleistocene | Koch 2004           | enamel   | cheek tooth  | -2.1 | -10.9 | NA  | 29.9 | -1.0 | nd |
| Proboscidea | Elephantidae    | <i>Mammuthus</i>   | <i>sp.</i> | SMNH          | WACO-E  | Herbivore | Non-ruminant | Vaco Mammoth Sit  | Pleistocene | Koch 2004           | enamel   | cheek tooth  | -3.1 | -11.9 | NA  | 29.1 | -1.7 | nd |
| Proboscidea | Elephantidae    | <i>Mammuthus</i>   | <i>sp.</i> | SMNH          | WACO-F  | Herbivore | Non-ruminant | Vaco Mammoth Sit  | Pleistocene | Koch 2004           | enamel   | cheek tooth  | -3.3 | -12.1 | NA  | 29.1 | -1.7 | nd |
| Proboscidea | Elephantidae    | <i>Mammuthus</i>   | <i>sp.</i> | SMNH          | WACO-I  | Herbivore | Non-ruminant | Vaco Mammoth Sit  | Pleistocene | Koch 2004           | enamel   | cheek tooth  | -2.3 | -11.1 | NA  | 30.4 | -0.4 | nd |
| Proboscidea | Elephantidae    | <i>Mammuthus</i>   | <i>sp.</i> | SMNH          | WACO-K  | Herbivore | Non-ruminant | Vaco Mammoth Sit  | Pleistocene | Koch 2004           | enamel   | cheek tooth  | -2.7 | -11.5 | NA  | 28.0 | -2.8 | nd |
| Proboscidea | Elephantidae    | <i>Mammuthus</i>   | <i>sp.</i> | SMNH          | WACO-M  | Herbivore | Non-ruminant | Vaco Mammoth Sit  | Pleistocene | Koch 2004           | enamel   | cheek tooth  | -3.5 | -12.3 | NA  | 30.0 | -0.8 | nd |
| Proboscidea | Elephantidae    | <i>Mammuthus</i>   | <i>sp.</i> | SMNH          | WACO-N  | Herbivore | Non-ruminant | Vaco Mammoth Sit  | Pleistocene | Koch 2004           | enamel   | cheek tooth  | -2.0 | -10.8 | NA  | 30.7 | -0.2 | nd |
| Proboscidea | Elephantidae    | <i>Mammuthus</i>   | <i>sp.</i> | SMNH          | WACO-Q  | Herbivore | Non-ruminant | Vaco Mammoth Sit  | Pleistocene | Koch 2004           | enamel   | cheek tooth  | -3.3 | -12.1 | NA  | 29.3 | -1.6 | nd |
| Proboscidea | Elephantidae    | <i>Mammuthus</i>   | <i>sp.</i> | SMP           | 60345   | Herbivore | Non-ruminant | Moore.Pit         | Pleistocene | Koch 2004           | enamel   | cheek tooth  | -2.2 | -11.0 | NA  | 29.1 | -1.7 | nd |
| Proboscidea | Elephantidae    | <i>Mammuthus</i>   | <i>sp.</i> | SMP           | 60351   | Herbivore | Non-ruminant | Moore.Pit         | Pleistocene | Koch 2004           | enamel   | cheek tooth  | -1.3 | -10.1 | NA  | 29.7 | -1.2 | nd |
| Proboscidea | Elephantidae    | <i>Mammuthus</i>   | <i>sp.</i> | SMP           | 60670   | Herbivore | Non-ruminant | Clear Creek       | Pleistocene | Koch 2004           | enamel   | molar 3      | -2.4 | -11.2 | NA  | 27.2 | -3.6 | nd |
| Proboscidea | Elephantidae    | <i>Mammuthus</i>   | <i>sp.</i> | SMP           | 60670   | Herbivore | Non-ruminant | Clear Creek       | Pleistocene | Koch 2004           | enamel   | molar 3      | -1.1 | -9.9  | NA  | 27.8 | -3.0 | nd |
| Proboscidea | Elephantidae    | <i>Mammuthus</i>   | <i>sp.</i> | SMP           | 60844   | Herbivore | Non-ruminant | Moore.Pit         | Pleistocene | Koch 2004           | enamel   | cheek tooth  | -3.2 | -12.0 | NA  | 28.3 | -2.5 | nd |
| Proboscidea | Elephantidae    | <i>Mammuthus</i>   | <i>sp.</i> | SMP           | 61233   | Herbivore | Non-ruminant | Ben Franklin      | Pleistocene | Koch 2004           | enamel   | cheek tooth  | -3.5 | -12.3 | NA  | 30.0 | -0.9 | nd |
| Proboscidea | Elephantidae    | <i>Mammuthus</i>   | <i>sp.</i> | SMP           | 61244   | Herbivore | Non-ruminant | Ben Franklin      | Pleistocene | Koch 2004           | enamel   | cheek tooth  | -1.3 | -10.1 | NA  | 29.4 | -1.4 | nd |
| Proboscidea | Elephantidae    | <i>Mammuthus</i>   | <i>sp.</i> | SMP           | 61245   | Herbivore | Non-ruminant | Ben Franklin      | Pleistocene | Koch 2004           | enamel   | cheek tooth  | -1.3 | -10.1 | NA  | 29.5 | -1.3 | nd |
| Proboscidea | Elephantidae    | <i>Mammuthus</i>   | <i>sp.</i> | SMP           | 62287   | Herbivore | Non-ruminant | Moore.Pit         | Pleistocene | Koch 2004           | enamel   | cheek tooth  | -1.7 | -10.5 | NA  | 29.7 | -1.1 | nd |
| Proboscidea | Elephantidae    | <i>Mammuthus</i>   | <i>sp.</i> | SMP           | 62357   | Herbivore | Non-ruminant | Moore.Pit         | Pleistocene | Koch 2004           | enamel   | cheek tooth  | -2.7 | -11.5 | NA  | 28.2 | -2.6 | nd |
| Proboscidea | Elephantidae    | <i>Mammuthus</i>   | <i>sp.</i> | SMP           | 62358   | Herbivore | Non-ruminant | Moore.Pit         | Pleistocene | Koch 2004           | enamel   | cheek tooth  | -3.9 | -12.7 | NA  | 28.5 | -2.3 | nd |
| Proboscidea | Elephantidae    | <i>Mammuthus</i>   | <i>sp.</i> | SMP           | 62359   | Herbivore | Non-ruminant | Moore.Pit         | Pleistocene | Koch 2004           | enamel   | cheek tooth  | -3.6 | -12.4 | NA  | 28.5 | -2.3 | nd |
| Proboscidea | Elephantidae    | <i>Mammuthus</i>   | <i>sp.</i> | SMP           | 70153   | Herbivore | Non-ruminant | Moore.Pit         | Pleistocene | Koch 2004           | enamel   | cheek tooth  | -2.3 | -11.1 | NA  | 29.1 | -1.7 | nd |
| Proboscidea | Elephantidae    | <i>Mammuthus</i>   | <i>sp.</i> | SMP           | 70161   | Herbivore | Non-ruminant | Moore.Pit         | Pleistocene | Koch 2004           | enamel   | cheek tooth  | -3.4 | -12.2 | NA  | 27.6 | -3.2 | nd |
| Proboscidea | Elephantidae    | <i>Mammuthus</i>   | <i>sp.</i> | SMP           | uncat   | Herbivore | Non-ruminant | Blackwater Draw   | Pleistocene | Koch 2004           | enamel   | molar        | -7.2 | -16.0 | NA  | 23.9 | -6.7 | nd |
| Proboscidea | Elephantidae    | <i>Mammuthus</i>   | <i>sp.</i> | incataloguedA |         | Herbivore | Non-ruminant |                   | Pleistocene | Present Study       | enamel   | tooth        | -0.7 | -9.5  | NA  |      | -2.2 | nd |
| Proboscidea | Elephantidae    | <i>Mammuthus</i>   | <i>sp.</i> | 41465         | 172     | Herbivore | Non-ruminant | Laubach 5         | Pleistocene | Present Study       | collagen | carpal       | bdl  | nd    | bdl |      |      | nd |
| Proboscidea | Elephantidae    | <i>Mammuthus</i>   | <i>sp.</i> | 43067         | 37      | Herbivore | Non-ruminant | Congress Avenue   | Pleistocene | Present Study       | collagen | femur        | bdl  | nd    | bdl |      |      | nd |
| Proboscidea | Elephantidae    | <i>Mammuthus</i>   | <i>sp.</i> | 43067         | 101     | Herbivore | Non-ruminant | Congress Avenue   | Pleistocene | Present Study       | collagen | n/a          | bdl  | nd    | bdl |      |      | nd |
| Proboscidea | Elephantidae    | <i>Mammuthus</i>   | <i>sp.</i> | 40613         | 1.11    | Herbivore | Non-ruminant | San Domingo Creek | Pleistocene | Present Study       | collagen | rib          | bdl  | nd    | bdl |      |      | nd |
| Proboscidea | Elephantidae    | <i>Mammuthus</i>   | <i>sp.</i> | 933           | 748     | Herbivore | Non-ruminant | Friesenhahn Cave  | Pleistocene | Present Study       | collagen | skull        | bdl  | nd    | bdl |      |      | nd |
| Proboscidea | Elephantidae    | <i>Proboscidea</i> | <i>sp.</i> | L327          | 7       | Herbivore | Non-ruminant | Near Enloe Bridge | Pleistocene | Present Study       | collagen | dentine      | bdl  | nd    | bdl |      |      | nd |
| Proboscidea | Elephantidae    | <i>Proboscidea</i> | <i>sp.</i> | 908           | 2443    | Herbivore | Non-ruminant | Kincaid Shelter   | Pleistocene | Present Study       | collagen | rib          | bdl  | nd    | bdl |      |      | nd |
| Proboscidea | Gomphotheriidae | <i>Cuvieronius</i> | <i>sp.</i> | 30967         | 219     | Herbivore | Non-ruminant | Ingleside         | Pleistocene | Yann et al. 2016    | enamel   | molar        | -7.4 | -16.2 | NA  | 29.3 | -1.5 | nd |

**Table S6. RMA relationships and  $\delta^{13}\text{C}$  carbonate-  $\delta^{13}\text{C}$  collagen spacing associated with enamel-collagen offsets. Data are from Codron et al. 2018.**

| Group        | RMA Slope | RMA Intercept | r <sup>2</sup> | p-value | Mean $\delta^{13}\text{C}_{\text{collagen}}$ | Mean spacing<br>( $\delta^{13}\text{C}_{\text{carbonate}} - \delta^{13}\text{C}_{\text{collagen}}$ ) | Spacing<br>Stdev | mean<br>$\delta^{13}\text{C}_{\text{corrected}}$ | mean $\delta^{13}\text{C}_{\text{corrected}} -$<br>mean $\delta^{13}\text{C}_{\text{collagen}}$ |
|--------------|-----------|---------------|----------------|---------|----------------------------------------------|------------------------------------------------------------------------------------------------------|------------------|--------------------------------------------------|-------------------------------------------------------------------------------------------------|
| Ruminant     | 1.21      | 11.03         | 0.90           | <0.01   | -14.7                                        | 8.8                                                                                                  | 2.2              | -15.2                                            | -0.5                                                                                            |
| Non-ruminant | 1.05      | 9.43          | 0.88           | <0.01   | -13.0                                        | 8.8                                                                                                  | 1.8              | -13.0                                            | 0.0                                                                                             |
| Felidae      | 0.96      | 3.92          | 0.91           | <0.01   | -14.1                                        | 4.4                                                                                                  | 1.2              | -13.6                                            | 0.5                                                                                             |
| Canidae      | 1.12      | 6.77          | 0.90           | <0.01   | -15.1                                        | 5.0                                                                                                  | 1.2              | -15.1                                            | 0.0                                                                                             |

Table S7. Statistical tests of changes in body mass and isotopes from the Pleistocene to Holocene. Welsh Two Sample t-test

MASS: PLEISTOCENE - HOLOCENE

| Status         | Order        | Family         | Genus              | Species                   | Common Name         | ANOVA p-value | Holocene Mean Mass | Pleistocene Mean Mass | t     | p-value | $\alpha$ -Bonferroni (=0.0038) | df    | estimate | conf.low | conf.high |
|----------------|--------------|----------------|--------------------|---------------------------|---------------------|---------------|--------------------|-----------------------|-------|---------|--------------------------------|-------|----------|----------|-----------|
| Extant         | Artiodactyla | Antilocapridae | <i>Antilocapra</i> | <i>americana</i>          | Pronghorn           | 0.519         | 52.1               | 58.3                  | -0.64 | 0.533   | n                              | 14.5  | -6.2     | -26.9    | 14.5      |
| Extinct/Extant | Artiodactyla | Bovidae        | <i>Bison</i> *     | <i>antiquus-bison</i>     | Bison               | 1.7E-10       | 476.7              | 778.5                 | -6.93 | 2.3E-10 | y                              | 119.0 | 11.9     | 4.1      | 19.7      |
| Extant         | Artiodactyla | Cervidae       | <i>Odocoileus</i>  | <i>sp.</i>                | Deer                | 0.018         | 73.4               | 61.4                  | 3.01  | 0.003   | y                              | 137.3 | -301.8   | -388.0   | -215.5    |
| Extant         | Carnivora    | Canidae        | <i>Canis</i>       | <i>familiaris</i>         | Domestic dog        | 0.036         | 8.4                | 11.5                  | -1.43 | 0.241   | n                              | 3.3   | -3.1     | -9.6     | 3.4       |
| Extant         | Carnivora    | Canidae        | <i>Canis</i>       | <i>latrans</i>            | Coyote              | 0.297         | 9.6                | 10.4                  | -1.08 | 0.284   | n                              | 56.8  | -0.8     | -2.2     | 0.7       |
| Extant         | Carnivora    | Canidae        | <i>Canis</i>       | <i>latrans/familiaris</i> | Coyote or Dog       | 0.539         | 9.5                | 9.1                   | 0.58  | 0.565   | n                              | 32.2  | 0.4      | -1.1     | 1.9       |
| Extant         | Carnivora    | Canidae        | <i>Canis</i>       | <i>lupus</i>              | Wolf                | 0.686         | 28.0               | 29.3                  | -0.43 | 0.670   | n                              | 22.4  | -1.2     | -7.2     | 4.7       |
| Extant/Extinct | Carnivora    | Canidae        | <i>Canis</i>       | <i>sp.</i>                | Wolf, Coyote or Dog | n/a           | n/a                | n/a                   | n/a   | n/a     | n/a                            | n/a   | n/a      | n/a      | n/a       |
| Extant         | Carnivora    | Felidae        | <i>Lynx</i>        | <i>rufus</i>              | Bobcat              | 0.068         | 15.9               | 11.1                  | 1.88  | 0.089   | n                              | 10.5  | 4.8      | -0.9     | 10.4      |
| Extant         | Carnivora    | Felidae        | <i>Panthera</i>    | <i>onca</i>               | Jaguar              | n/a           | n/a                | n/a                   | n/a   | n/a     | n/a                            | n/a   | n/a      | n/a      | n/a       |
| Extant         | Carnivora    | Mephitidae     | <i>Mephitis</i>    | <i>mephitis</i>           | Striped skunk       | 0.649         | 2.0                | 2.3                   | -0.94 | 0.375   | n                              | 8.4   | -0.3     | -1.2     | 0.5       |
| Extant         | Carnivora    | Mephitidae     | <i>Spilogale</i>   | <i>sp.</i>                | Skunk               | n/a           | n/a                | n/a                   | n/a   | n/a     | n/a                            | n/a   | n/a      | n/a      | n/a       |
| Extant         | Carnivora    | Procyonidae    | <i>Procyon</i>     | <i>lotor</i>              | Raccoon             | 0.717         | 7.1                | 5.8                   | 0.35  | 0.751   | n                              | 2.8   | 1.4      | -11.6    | 14.3      |
| Extant         | Carnivora    | Ursidae        | <i>Ursus</i>       | <i>americanus</i>         | Black bear          | 0.874         | 173.7              | 178.5                 | -0.15 | 0.885   | n                              | 9.9   | -4.8     | -76.8    | 67.2      |
| Extant         | Lagomorpha   | Leporidae      | <i>Lepus</i>       | <i>sp.</i>                | Jackrabbit          | 0.016         | 4.5                | 2.8                   | 3.07  | 0.005   | n                              | 24.1  | 1.7      | 0.5      | 2.8       |
| Extant         | Lagomorpha   | Leporidae      | <i>Sylvilagus</i>  | <i>sp.</i>                | Cottontail rabbit   | 3.6E-04       | 0.8                | 1.0                   | -3.55 | 0.001   | y                              | 134.9 | -0.2     | -0.3     | -0.1      |

$\delta^{13}C$ : PLEISTOCENE - HOLOCENE

| Status         | Order        | Family         | Genus              | Species                   | Common Name         | ANOVA p-value | Holocene Mean $\delta^{13}C$ | Pleistocene Mean $\delta^{13}C$ | t     | p-value | $\alpha$ -Bonferroni (=0.0035) | df    | estimate | conf.low | conf.high |
|----------------|--------------|----------------|--------------------|---------------------------|---------------------|---------------|------------------------------|---------------------------------|-------|---------|--------------------------------|-------|----------|----------|-----------|
| Extant         | Artiodactyla | Antilocapridae | <i>Antilocapra</i> | <i>americana</i>          | Pronghorn           | 0.933         | -19.0                        | -18.9                           | -0.27 | 0.795   | n                              | 10.3  | -0.1     | -0.9     | 0.7       |
| Extinct/Extant | Artiodactyla | Bovidae        | <i>Bison</i> *     | <i>antiquus-bison</i>     | Bison               | 0.163         | -10.1                        | -9.4                            | -1.39 | 0.185   | n                              | 14.6  | -0.7     | -1.9     | 0.4       |
| Extant         | Artiodactyla | Cervidae       | <i>Odocoileus</i>  | <i>sp.</i>                | Deer                | 0.023         | -19.2                        | -19.9                           | 2.53  | 0.015   | n                              | 43.5  | 0.8      | 0.2      | 1.4       |
| Extant         | Carnivora    | Canidae        | <i>Canis</i>       | <i>familiaris</i>         | Domestic dog        | n/a           | n/a                          | n/a                             | n/a   | n/a     | n/a                            | n/a   | n/a      | n/a      | n/a       |
| Extant         | Carnivora    | Canidae        | <i>Canis</i>       | <i>latrans</i>            | Coyote              | 0.274         | -13.5                        | -14.9                           | 1.38  | 0.208   | n                              | 7.7   | 1.4      | -1.0     | 3.8       |
| Extant         | Carnivora    | Canidae        | <i>Canis</i>       | <i>latrans/familiaris</i> | Coyote or Dog       | n/a           | n/a                          | n/a                             | n/a   | n/a     | n/a                            | n/a   | n/a      | n/a      | n/a       |
| Extant         | Carnivora    | Canidae        | <i>Canis</i>       | <i>lupus</i>              | Wolf                | 0.486         | -11.5                        | -13.3                           | 0.84  | 0.437   | n                              | 5.0   | 1.8      | -3.6     | 7.1       |
| Extant/Extinct | Carnivora    | Canidae        | <i>Canis</i>       | <i>sp.</i>                | Wolf, Coyote or Dog | 0.426         | -14.4                        | -15.5                           | 0.52  | 0.652   | n                              | 2.2   | 1.1      | -7.1     | 9.2       |
| Extant         | Carnivora    | Felidae        | <i>Lynx</i>        | <i>rufus</i>              | Bobcat              | 0.016         | -15.6                        | -17.7                           | 2.56  | 0.040   | y                              | 6.6   | 2.2      | 0.1      | 4.2       |
| Extant         | Carnivora    | Felidae        | <i>Panthera</i>    | <i>onca</i>               | Jaguar              | 0.001         | -10.4                        | -15.6                           | 5.78  | 0.009   | y                              | 3.1   | 5.2      | 2.4      | 8.1       |
| Extant         | Carnivora    | Mephitidae     | <i>Mephitis</i>    | <i>mephitis</i>           | Striped skunk       | 0.621         | -14.9                        | -15.4                           | 0.61  | 0.554   | n                              | 9.0   | 0.5      | -1.3     | 2.3       |
| Extant         | Carnivora    | Mephitidae     | <i>Spilogale</i>   | <i>sp.</i>                | Skunk               | 0.543         | -16.9                        | -17.4                           | 0.57  | 0.592   | n                              | 4.8   | 0.4      | -1.5     | 2.4       |
| Extant         | Carnivora    | Procyonidae    | <i>Procyon</i>     | <i>lotor</i>              | Raccoon             | 0.335         | -16.2                        | -17.5                           | 1.17  | 0.391   | n                              | 1.6   | 1.2      | -4.9     | 7.3       |
| Extant         | Carnivora    | Ursidae        | <i>Ursus</i>       | <i>americanus</i>         | Black bear          | 0.409         | -18.2                        | -18.8                           | 0.86  | 0.412   | n                              | 8.5   | 0.5      | -0.9     | 2.0       |
| Extant         | Lagomorpha   | Leporidae      | <i>Lepus</i>       | <i>sp.</i>                | Jackrabbit          | 0.001         | -16.3                        | -18.3                           | 3.22  | 0.002   | y                              | 66.0  | 2.0      | 0.8      | 3.2       |
| Extant         | Lagomorpha   | Leporidae      | <i>Sylvilagus</i>  | <i>sp.</i>                | Cottontail rabbit   | 7.6E-05       | -17.6                        | -18.7                           | 4.38  | 1.7E-05 | y                              | 286.3 | 1.1      | 0.6      | 1.6       |
| Extant         | Artiodactyla | Tayassuidae    | <i>Pecari</i>      | <i>tajacu</i>             | Collared peccary    | 0.438         | -16.5                        | -16.2                           | -0.96 | 0.494   | n                              | 1.2   | -0.4     | -3.7     | 3.0       |

$\delta^{15}N$ : PLEISTOCENE - HOLOCENE

| Status         | Order        | Family         | Genus              | Species                   | Common Name   | ANOVA p-value | Holocene Mean $\delta^{15}N$ | Pleistocene Mean $\delta^{15}N$ | t     | p-value | $\alpha$ -Bonferroni (=0.0035) | df   | estimate | conf.low | conf.high |
|----------------|--------------|----------------|--------------------|---------------------------|---------------|---------------|------------------------------|---------------------------------|-------|---------|--------------------------------|------|----------|----------|-----------|
| Extant         | Artiodactyla | Antilocapridae | <i>Antilocapra</i> | <i>americana</i>          | Pronghorn     | 0.844         | 6.5                          | 6.7                             | -0.43 | 0.692   | n                              | 3.6  | -0.2     | -1.2     | 0.9       |
| Extinct/Extant | Artiodactyla | Bovidae        | <i>Bison</i> *     | <i>antiquus-bison</i>     | Bison         | 2.5E-04       | 6.1                          | 8.7                             | -1.50 | 0.373   | n                              | 1.0  | -2.6     | -23.6    | 18.5      |
| Extant         | Artiodactyla | Cervidae       | <i>Odocoileus</i>  | <i>sp.</i>                | Deer          | 0.120         | 6.5                          | 7.1                             | -1.05 | 0.315   | n                              | 12.3 | -0.6     | -1.9     | 0.7       |
| Extant         | Carnivora    | Canidae        | <i>Canis</i>       | <i>familiaris</i>         | Domestic dog  | n/a           | n/a                          | n/a                             | n/a   | n/a     | n/a                            | n/a  | n/a      | n/a      | n/a       |
| Extant         | Carnivora    | Canidae        | <i>Canis</i>       | <i>latrans</i>            | Coyote        | 0.743         | 9.4                          | 9.6                             | -0.36 | 0.732   | n                              | 6.4  | -0.3     | -2.2     | 1.7       |
| Extant         | Carnivora    | Canidae        | <i>Canis</i>       | <i>latrans/familiaris</i> | Coyote or Dog | n/a           | n/a                          | n/a                             | n/a   | n/a     | n/a                            | n/a  | n/a      | n/a      | n/a       |
| Extant         | Carnivora    | Canidae        | <i>Canis</i>       | <i>lupus</i>              | Wolf          | 0.138         | 9.8                          | 11.8                            | -1.85 | 0.127   | n                              | 4.8  | -2.0     | -4.7     | 0.8       |

|                |              |             |                   |                   |                     |         |      |      |       |       |   |       |      |      |     |
|----------------|--------------|-------------|-------------------|-------------------|---------------------|---------|------|------|-------|-------|---|-------|------|------|-----|
| Extant/Extinct | Carnivora    | Canidae     | <i>Canis</i>      | <i>sp.</i>        | Wolf, Coyote or Dog | 0.826   | 9.1  | 8.8  | 0.13  | 0.910 | n | 2.1   | 0.3  | -8.4 | 9.0 |
| Extant         | Carnivora    | Felidae     | <i>Lynx</i>       | <i>rufus</i>      | Bobcat              | 0.001   | 9.1  | 6.8  | 3.88  | 0.006 | n | 7.2   | 2.3  | 0.9  | 3.7 |
| Extant         | Carnivora    | Felidae     | <i>Panthera</i>   | <i>onca</i>       | Jaguar              | 0.079   | 13.1 | 12.1 | 1.93  | 0.169 | n | 2.5   | 1.0  | -0.9 | 2.9 |
| Extant         | Carnivora    | Mephitidae  | <i>Mephitis</i>   | <i>mephitis</i>   | Striped skunk       | 0.954   | 9.5  | 9.6  | -0.05 | 0.960 | n | 4.6   | -0.1 | -4.0 | 3.9 |
| Extant         | Carnivora    | Mephitidae  | <i>Spilogale</i>  | <i>sp.</i>        | Skunk               | 0.330   | 11.0 | 9.9  | 0.90  | 0.414 | n | 4.5   | 1.1  | -2.1 | 4.2 |
| Extant         | Carnivora    | Procyonidae | <i>Procyon</i>    | <i>lotor</i>      | Raccoon             | 1.000   | 8.7  | 8.7  | 0.00  | 1.000 | n | 5.6   | 0.0  | -2.0 | 2.0 |
| Extant         | Carnivora    | Ursidae     | <i>Ursus</i>      | <i>americanus</i> | Black bear          | 0.963   | 5.7  | 5.8  | -0.05 | 0.965 | n | 5.8   | 0.0  | -2.6 | 2.5 |
| Extant         | Lagomorpha   | Leporidae   | <i>Lepus</i>      | <i>sp.</i>        | Jackrabbit          | 0.081   | 5.3  | 5.8  | -1.44 | 0.156 | n | 48.4  | -0.6 | -1.4 | 0.2 |
| Extant         | Lagomorpha   | Leporidae   | <i>Sylvilagus</i> | <i>sp.</i>        | Cottontail rabbit   | 7.3E-06 | 5.3  | 4.7  | 4.12  | 0.000 | y | 167.9 | 0.7  | 0.3  | 1.0 |
| Extant         | Artiodactyla | Tayassuidae | <i>Pecari</i>     | <i>tajacu</i>     | Collared peccary    | 0.207   | 6.5  | 7.2  | -1.84 | 0.264 | n | 1.4   | -0.7 | -3.4 | 2.0 |

MASS: HOLOCENE - MODERN

| Status         | Order        | Family         | Genus              | Species                   | Common Name         | ANOVA p-value | Modern Mean Mass | Holocene Mean Mass | t     | p-value | α-Bonferroni (=0.01) | df   | estimate | conf.low | conf.high |
|----------------|--------------|----------------|--------------------|---------------------------|---------------------|---------------|------------------|--------------------|-------|---------|----------------------|------|----------|----------|-----------|
| x              | Artiodactyla | Antilocapridae | <i>Antilocapra</i> | <i>americana</i>          | Pronghorn           | n/a           | n/a              | n/a                | n/a   | n/a     | n/a                  | n/a  | n/a      | n/a      | n/a       |
| Extinct/Extant | Artiodactyla | Bovidae        | <i>Bison</i>       | <i>antiquus-bison</i>     | Bison               | n/a           | n/a              | n/a                | n/a   | n/a     | n/a                  | n/a  | n/a      | n/a      | n/a       |
| Extant         | Artiodactyla | Cervidae       | <i>Odocoileus</i>  | <i>sp.</i>                | Deer                | n/a           | n/a              | n/a                | n/a   | n/a     | n/a                  | n/a  | n/a      | n/a      | n/a       |
| Extant         | Carnivora    | Canidae        | <i>Canis</i>       | <i>familiaris</i>         | Domestic dog        | n/a           | n/a              | n/a                | n/a   | n/a     | n/a                  | n/a  | n/a      | n/a      | n/a       |
| Extant         | Carnivora    | Canidae        | <i>Canis</i>       | <i>latrans</i>            | Coyote              | n/a           | n/a              | n/a                | n/a   | n/a     | n/a                  | n/a  | n/a      | n/a      | n/a       |
| Extant         | Carnivora    | Canidae        | <i>Canis</i>       | <i>latrans/familiaris</i> | Coyote or Dog       | n/a           | n/a              | n/a                | n/a   | n/a     | n/a                  | n/a  | n/a      | n/a      | n/a       |
| Extant         | Carnivora    | Canidae        | <i>Canis</i>       | <i>lupus</i>              | Wolf                | 2.2E-04       | 21.7             | 28.0               | 3.04  | 0.011   | n                    | 10.7 | 6.3      | 1.7      | 10.9      |
| Extant/Extinct | Carnivora    | Canidae        | <i>Canis</i>       | <i>sp.</i>                | Wolf, Coyote or Dog | n/a           | n/a              | n/a                | n/a   | n/a     | n/a                  | n/a  | n/a      | n/a      | n/a       |
| Extant         | Carnivora    | Felidae        | <i>Lynx</i>        | <i>rufus</i>              | Bobcat              | 0.035         | 11.7             | 15.9               | 1.75  | 0.114   | n                    | 8.9  | 4.2      | -1.2     | 9.7       |
| Extant         | Carnivora    | Felidae        | <i>Panthera</i>    | <i>onca</i>               | Jaguar              | n/a           | n/a              | n/a                | n/a   | n/a     | n/a                  | n/a  | n/a      | n/a      | n/a       |
| Extant         | Carnivora    | Mephitidae     | <i>Mephitis</i>    | <i>mephitis</i>           | Striped skunk       | 0.128         | 1.5              | 2.0                | 2.38  | 0.155   | n                    | 1.8  | 0.4      | -0.5     | 1.3       |
| Extant         | Carnivora    | Mephitidae     | <i>Spilogale</i>   | <i>sp.</i>                | Skunk               | n/a           | n/a              | n/a                | n/a   | n/a     | n/a                  | n/a  | n/a      | n/a      | n/a       |
| Extant         | Carnivora    | Procyonidae    | <i>Procyon</i>     | <i>lotor</i>              | Raccoon             | n/a           | n/a              | n/a                | n/a   | n/a     | n/a                  | n/a  | n/a      | n/a      | n/a       |
| Extant         | Carnivora    | Ursidae        | <i>Ursus</i>       | <i>americanus</i>         | Black bear          | n/a           | n/a              | n/a                | n/a   | n/a     | n/a                  | n/a  | n/a      | n/a      | n/a       |
| Extant         | Lagomorpha   | Leporidae      | <i>Lepus</i>       | <i>sp.</i>                | Jackrabbit          | 0.018         | 2.6              | 4.5                | 4.42  | 2.5E-04 | y                    | 20.7 | 1.9      | 1.0      | 2.8       |
| Extant         | Lagomorpha   | Leporidae      | <i>Sylvilagus</i>  | <i>sp.</i>                | Cottontail rabbit   | 8.3E-05       | 1.3              | 0.8                | -2.26 | 0.046   | n                    | 10.4 | -0.5     | -1.1     | 0.0       |



**Table S9. Results of ANOVA tests for isotope values across enamel ( $\delta^{13}\text{C}$ ), collagen ( $\delta^{13}\text{C}$  and  $\delta^{15}\text{N}$ ), and enamel versus collagen (corrected  $\delta^{13}\text{C}$ ). Bonferroni adjusted significance values given**  
 Only groups with 7 or more samples were included. Bonferroni corrections were made for multiple comparisons. No comparisons were significant after adjustment

| Family          | Genus              | Species               | PLEISTOCENE: Enamel $\delta^{13}\text{C}$ |                    |       |         |         | PLEISTOCENE: Collagen $\delta^{13}\text{C}$ $\delta^{15}\text{N}$ |                     |                    |      |         |         |                                        |       |       |
|-----------------|--------------------|-----------------------|-------------------------------------------|--------------------|-------|---------|---------|-------------------------------------------------------------------|---------------------|--------------------|------|---------|---------|----------------------------------------|-------|-------|
|                 |                    |                       | Number of Specimens                       | Number of Elements | df    | F-value | P-value | Bonferroni adjusted significance level                            | Number of Specimens | Number of Elements | df   | F-value | P-value | Bonferroni adjusted significance level |       |       |
| Antilocapridae  | <i>Antilocapra</i> | <i>americana</i>      | 0                                         | --                 | --    | --      | --      | --                                                                | 2                   | --                 | --   | --      | --      | --                                     | --    |       |
| Antilocapridae  | <i>Capromeryx</i>  | <i>sp.</i>            | 1                                         | --                 | --    | --      | --      | --                                                                | 0                   | --                 | --   | --      | --      | --                                     | --    |       |
| Antilocapridae  | <i>Tetrameryx</i>  | <i>sp.</i>            | 0                                         | --                 | --    | --      | --      | --                                                                | 1                   | --                 | --   | --      | --      | --                                     | --    |       |
| Bovidae         | <i>Bison</i>       | <i>antiquus</i>       | 2                                         | --                 | --    | --      | --      | --                                                                | 2                   | --                 | --   | --      | --      | --                                     | --    |       |
| Bovidae         | <i>Bison</i>       | <i>bison</i>          | 0                                         | --                 | --    | --      | --      | --                                                                | 0                   | --                 | --   | --      | --      | --                                     | --    |       |
| Bovidae         | <i>Bison</i>       | <i>latifrons</i>      | 1                                         | --                 | --    | --      | --      | --                                                                | 0                   | --                 | --   | --      | --      | --                                     | --    |       |
| Bovidae         | <i>Bison</i>       | <i>sp.</i>            | 29                                        | 8                  | 7/21  | 1.00    | 0.460   | 0.002                                                             | 12                  | 5                  | 4/7  | 1.04    | 0.452   | 0.51                                   | 0.730 | 0.005 |
| Camelidae       | <i>Camelops</i>    | <i>hesternus</i>      | 22                                        | 5                  | 4/17  | 1.03    | 0.419   | 0.005                                                             | 0                   | --                 | --   | --      | --      | --                                     | --    |       |
| Camelidae       | <i>Palaeolama</i>  | <i>mirifica</i>       | 5                                         | --                 | --    | --      | --      | --                                                                | 0                   | --                 | --   | --      | --      | --                                     | --    |       |
| Canidae         | <i>Canis</i>       | <i>dirus</i>          | 3                                         | --                 | --    | --      | --      | --                                                                | 5                   | --                 | --   | --      | --      | --                                     | --    |       |
| Canidae         | <i>Canis</i>       | <i>familiaris</i>     | 0                                         | --                 | --    | --      | --      | --                                                                | 0                   | --                 | --   | --      | --      | --                                     | --    |       |
| Canidae         | <i>Canis</i>       | <i>latrans</i>        | 0                                         | --                 | --    | --      | --      | --                                                                | 5                   | --                 | --   | --      | --      | --                                     | --    |       |
| Canidae         | <i>Canis</i>       | <i>lupus</i>          | 0                                         | --                 | --    | --      | --      | --                                                                | 2                   | --                 | --   | --      | --      | --                                     | --    |       |
| Canidae         | <i>Vulpes</i>      | <i>sp.</i>            | 0                                         | --                 | --    | --      | --      | --                                                                | 0                   | --                 | --   | --      | --      | --                                     | --    |       |
| Cervidae        | <i>Navahocerus</i> | <i>fricki</i>         | 1                                         | --                 | --    | --      | --      | --                                                                | 0                   | --                 | --   | --      | --      | --                                     | --    |       |
| Cervidae        | <i>Odocoileus</i>  | <i>sp.</i>            | 6                                         | --                 | --    | --      | --      | --                                                                | 11                  | 4                  | 3/7  | 1.76    | 0.242   | 4.33                                   | 0.050 | 0.008 |
| Elephantidae    | <i>Mammut</i>      | <i>americanum</i>     | 2                                         | --                 | --    | --      | --      | --                                                                | 0                   | --                 | --   | --      | --      | --                                     | --    |       |
| Elephantidae    | <i>Mammuthus</i>   | <i>sp.</i>            | 76                                        | 10                 | 9/66  | 3.14    | 0.003   | 0.001                                                             | 0                   | --                 | --   | --      | --      | --                                     | --    |       |
| Equidae         | <i>Equus</i>       | <i>sp.</i>            | 83                                        | 14                 | 13/69 | 1.62    | 0.100   | 0.001                                                             | 5                   | --                 | --   | --      | --      | --                                     | --    |       |
| Felidae         | <i>Felis</i>       | <i>idii/yagouarou</i> | 0                                         | --                 | --    | --      | --      | --                                                                | 1                   | --                 | --   | --      | --      | --                                     | --    |       |
| Felidae         | <i>Homotherium</i> | <i>serum</i>          | 0                                         | --                 | --    | --      | --      | --                                                                | 1                   | --                 | --   | --      | --      | --                                     | --    |       |
| Felidae         | <i>Lynx</i>        | <i>rufus</i>          | 0                                         | --                 | --    | --      | --      | --                                                                | 5                   | --                 | --   | --      | --      | --                                     | --    |       |
| Felidae         | <i>Panthera</i>    | <i>leo atrox</i>      | 2                                         | --                 | --    | --      | --      | --                                                                | 0                   | --                 | --   | --      | --      | --                                     | --    |       |
| Felidae         | <i>Panthera</i>    | <i>onca</i>           | 1                                         | --                 | --    | --      | --      | --                                                                | 3                   | --                 | --   | --      | --      | --                                     | --    |       |
| Felidae         | <i>Puma</i>        | <i>concolor</i>       | 0                                         | --                 | --    | --      | --      | --                                                                | 0                   | --                 | --   | --      | --      | --                                     | --    |       |
| Felidae         | <i>Smilodon</i>    | <i>fatalis</i>        | 4                                         | --                 | --    | --      | --      | --                                                                | 1                   | --                 | --   | --      | --      | --                                     | --    |       |
| Gomphotheriidae | <i>Cuvierianus</i> | <i>sp.</i>            | 0                                         | --                 | --    | --      | --      | --                                                                | 0                   | --                 | --   | --      | --      | --                                     | --    |       |
| Leporidae       | <i>Lepus</i>       | <i>sp.</i>            | 0                                         | --                 | --    | --      | --      | --                                                                | 0                   | --                 | --   | --      | --      | --                                     | --    |       |
| Leporidae       | <i>Sylvilagus</i>  | <i>sp.</i>            | 0                                         | --                 | --    | --      | --      | --                                                                | 40                  | 5                  | 4/35 | 1.70    | 0.173   | 1.10                                   | 0.372 | 0.005 |
| Mephitidae      | <i>Mephitis</i>    | <i>mephitis</i>       | 0                                         | --                 | --    | --      | --      | --                                                                | 4                   | --                 | --   | --      | --      | --                                     | --    |       |
| Mephitidae      | <i>Spilogale</i>   | <i>sp.</i>            | 0                                         | --                 | --    | --      | --      | --                                                                | 9                   | --                 | --   | --      | --      | --                                     | --    |       |
| Mustelidae      | <i>Mustela</i>     | <i>sp.</i>            | 0                                         | --                 | --    | --      | --      | --                                                                | 1                   | --                 | --   | --      | --      | --                                     | --    |       |
| Mustelidae      | <i>Taxidea</i>     | <i>taxus</i>          | 0                                         | --                 | --    | --      | --      | --                                                                | 0                   | --                 | --   | --      | --      | --                                     | --    |       |
| Procyonidae     | <i>Procyon</i>     | <i>lotor</i>          | 0                                         | --                 | --    | --      | --      | --                                                                | 1                   | --                 | --   | --      | --      | --                                     | --    |       |
| Tapiridae       | <i>Tapirus</i>     | <i>veroensis</i>      | 2                                         | --                 | --    | --      | --      | --                                                                | 0                   | --                 | --   | --      | --      | --                                     | --    |       |
| Tayassuidae     | <i>Platygonus</i>  | <i>compressus</i>     | 2                                         | --                 | --    | --      | --      | --                                                                | 2                   | --                 | --   | --      | --      | --                                     | --    |       |
| Ursidae         | <i>Arctodus</i>    | <i>simus</i>          | 0                                         | --                 | --    | --      | --      | --                                                                | 1                   | --                 | --   | --      | --      | --                                     | --    |       |
| Ursidae         | <i>Ursus</i>       | <i>americanus</i>     | 0                                         | --                 | --    | --      | --      | --                                                                | 4                   | --                 | --   | --      | --      | --                                     | --    |       |

1 for multiple comparisons across number of elements.

| PLEISTOCENE: All Elements             |                    |      |         |         |                                        | HOLOCENE: Enamel    |                    |      |         |         |                                        | HOLOCENE: Collagen            |                    |       |         |         |         |         |
|---------------------------------------|--------------------|------|---------|---------|----------------------------------------|---------------------|--------------------|------|---------|---------|----------------------------------------|-------------------------------|--------------------|-------|---------|---------|---------|---------|
| Corrected $\delta^{13}C$              |                    |      |         |         |                                        | $\delta^{13}C$      |                    |      |         |         |                                        | $\delta^{13}C$ $\delta^{15}N$ |                    |       |         |         |         |         |
| Number of Specimens (enamel:collagen) | Number of Elements | df   | F-value | P-value | Bonferroni adjusted significance level | Number of Specimens | Number of Elements | df   | F-value | P-value | Bonferroni adjusted significance level | Number of Specimens           | Number of Elements | df    | F-value | P-value | F-value | P-value |
| 0:2                                   | --                 | --   | --      | --      | --                                     | 0                   | --                 | --   | --      | --      | --                                     | 16                            | 3                  | 2/13  | 0.63    | 0.547   | 0.23    | 0.799   |
| 1:0                                   | --                 | --   | --      | --      | --                                     | 0                   | --                 | --   | --      | --      | --                                     | 0                             | --                 | --    | --      | --      | --      | --      |
| 0:1                                   | --                 | --   | --      | --      | --                                     | 0                   | --                 | --   | --      | --      | --                                     | 0                             | --                 | --    | --      | --      | --      | --      |
| 2:2                                   | --                 | --   | --      | --      | --                                     | 0                   | --                 | --   | --      | --      | --                                     | 0                             | --                 | --    | --      | --      | --      | --      |
| 0:0                                   | --                 | --   | --      | --      | --                                     | 18                  | 7                  | 6/11 | 0.37    | 0.886   | 0.002                                  | 31                            | 3                  | 2/28  | 3.80    | 0.035   | 2.56    | 0.095   |
| 1:0                                   | --                 | --   | --      | --      | --                                     | 0                   | --                 | --   | --      | --      | --                                     | 0                             | --                 | --    | --      | --      | --      | --      |
| 29:12                                 | 6                  | 5/35 | 1.10    | 0.379   | 0.003                                  | 0                   | --                 | --   | --      | --      | --                                     | 0                             | --                 | --    | --      | --      | --      | --      |
| 22:0                                  | --                 | --   | --      | --      | --                                     | 0                   | --                 | --   | --      | --      | --                                     | 0                             | --                 | --    | --      | --      | --      | --      |
| 5:0                                   | --                 | --   | --      | --      | --                                     | 0                   | --                 | --   | --      | --      | --                                     | 0                             | --                 | --    | --      | --      | --      | --      |
| 3:5                                   | --                 | --   | --      | --      | --                                     | 0                   | --                 | --   | --      | --      | --                                     | 0                             | --                 | --    | --      | --      | --      | --      |
| 0:0                                   | --                 | --   | --      | --      | --                                     | 0                   | --                 | --   | --      | --      | --                                     | 3                             | --                 | --    | --      | --      | --      | --      |
| 0:5                                   | --                 | --   | --      | --      | --                                     | 0                   | --                 | --   | --      | --      | --                                     | 20                            | 5                  | 4/15  | 0.78    | 0.555   | 2.87    | 0.060   |
| 0:2                                   | --                 | --   | --      | --      | --                                     | 0                   | --                 | --   | --      | --      | --                                     | 7                             | 3                  | 2/4   | 0.59    | 0.598   | 0.66    | 0.564   |
| 0:0                                   | --                 | --   | --      | --      | --                                     | 0                   | --                 | --   | --      | --      | --                                     | 1                             | --                 | --    | --      | --      | --      | --      |
| 1:0                                   | --                 | --   | --      | --      | --                                     | 0                   | --                 | --   | --      | --      | --                                     | 0                             | --                 | --    | --      | --      | --      | --      |
| 6:11                                  | --                 | --   | --      | --      | --                                     | 7                   | 5                  | 4/2  | 1.34    | 0.470   | 0.005                                  | 50                            | 5                  | 4/45  | 0.64    | 0.635   | 1.04    | 0.399   |
| 2:0                                   | --                 | --   | --      | --      | --                                     | 0                   | --                 | --   | --      | --      | --                                     | 0                             | --                 | --    | --      | --      | --      | --      |
| 76:0                                  | --                 | --   | --      | --      | --                                     | 0                   | --                 | --   | --      | --      | --                                     | 0                             | --                 | --    | --      | --      | --      | --      |
| 83:5                                  | --                 | --   | --      | --      | --                                     | 0                   | --                 | --   | --      | --      | --                                     | 0                             | --                 | --    | --      | --      | --      | --      |
| 0:1                                   | --                 | --   | --      | --      | --                                     | 0                   | --                 | --   | --      | --      | --                                     | 0                             | --                 | --    | --      | --      | --      | --      |
| 0:1                                   | --                 | --   | --      | --      | --                                     | 0                   | --                 | --   | --      | --      | --                                     | 0                             | --                 | --    | --      | --      | --      | --      |
| 0:5                                   | --                 | --   | --      | --      | --                                     | 0                   | --                 | --   | --      | --      | --                                     | 8                             | 3                  | 2/5   | 0.23    | 0.803   | 0.29    | 0.764   |
| 2:0                                   | --                 | --   | --      | --      | --                                     | 0                   | --                 | --   | --      | --      | --                                     | 0                             | --                 | --    | --      | --      | --      | --      |
| 1:3                                   | --                 | --   | --      | --      | --                                     | 0                   | --                 | --   | --      | --      | --                                     | 3                             | --                 | --    | --      | --      | --      | --      |
| 0:0                                   | --                 | --   | --      | --      | --                                     | 0                   | --                 | --   | --      | --      | --                                     | 0                             | --                 | --    | --      | --      | --      | --      |
| 4:1                                   | --                 | --   | --      | --      | --                                     | 0                   | --                 | --   | --      | --      | --                                     | 0                             | --                 | --    | --      | --      | --      | --      |
| 0:0                                   | --                 | --   | --      | --      | --                                     | 0                   | --                 | --   | --      | --      | --                                     | 0                             | --                 | --    | --      | --      | --      | --      |
| 0:0                                   | --                 | --   | --      | --      | --                                     | 0                   | --                 | --   | --      | --      | --                                     | 43                            | 4                  | 3/39  | 0.03    | 0.992   | 0.08    | 0.968   |
| 0:40                                  | --                 | --   | --      | --      | --                                     | 0                   | --                 | --   | --      | --      | --                                     | 187                           | 5                  | 4/182 | 1.02    | 0.398   | 3.78    | 0.006   |
| 0:4                                   | --                 | --   | --      | --      | --                                     | 0                   | --                 | --   | --      | --      | --                                     | 7                             | 3                  | 2/4   | 0.40    | 0.694   | 4.28    | 0.101   |
| 0:9                                   | --                 | --   | --      | --      | --                                     | 0                   | --                 | --   | --      | --      | --                                     | 4                             | --                 | --    | --      | --      | --      | --      |
| 0:1                                   | --                 | --   | --      | --      | --                                     | 0                   | --                 | --   | --      | --      | --                                     | 0                             | --                 | --    | --      | --      | --      | --      |
| 0:0                                   | --                 | --   | --      | --      | --                                     | 0                   | --                 | --   | --      | --      | --                                     | 8                             | 3                  | 3/4   | 0.16    | 0.918   | 0.80    | 0.556   |
| 0:1                                   | --                 | --   | --      | --      | --                                     | 0                   | --                 | --   | --      | --      | --                                     | 10                            | 4                  | 6/3   | 5.73    | 0.090   | 1.13    | 0.498   |
| 2:0                                   | --                 | --   | --      | --      | --                                     | 0                   | --                 | --   | --      | --      | --                                     | 0                             | --                 | --    | --      | --      | --      | --      |
| 2:2                                   | --                 | --   | --      | --      | --                                     | 0                   | --                 | --   | --      | --      | --                                     | 2                             | --                 | --    | --      | --      | --      | --      |
| 0:1                                   | --                 | --   | --      | --      | --                                     | 0                   | --                 | --   | --      | --      | --                                     | 0                             | --                 | --    | --      | --      | --      | --      |
| 0:4                                   | --                 | --   | --      | --      | --                                     | 0                   | --                 | --   | --      | --      | --                                     | 2                             | --                 | --    | --      | --      | --      | --      |

| Bonferroni adjusted significance level | HOLOCENE: All Elements                |                    |      | Corrected $\delta^{13}C$ |         | Bonferroni adjusted significance level |
|----------------------------------------|---------------------------------------|--------------------|------|--------------------------|---------|----------------------------------------|
|                                        | Number of Specimens (enamel:collagen) | Number of Elements | df   | F-value                  | P-value |                                        |
| 0.017                                  | 0:16                                  | --                 | --   | --                       | --      | --                                     |
| --                                     | 0:0                                   | --                 | --   | --                       | --      | --                                     |
| --                                     | 0:0                                   | --                 | --   | --                       | --      | --                                     |
| --                                     | 0:0                                   | --                 | --   | --                       | --      | --                                     |
| 0.017                                  | 18:31                                 | 4                  | 3/45 | 2.24                     | 0.967   | 0.008                                  |
| --                                     | 0:0                                   | --                 | --   | --                       | --      | --                                     |
| --                                     | 0:0                                   | --                 | --   | --                       | --      | --                                     |
| --                                     | 0:0                                   | --                 | --   | --                       | --      | --                                     |
| --                                     | 0:0                                   | --                 | --   | --                       | --      | --                                     |
| --                                     | 0:0                                   | --                 | --   | --                       | --      | --                                     |
| --                                     | 0:3                                   | --                 | --   | --                       | --      | --                                     |
| 0.005                                  | 0:20                                  | --                 | --   | --                       | --      | --                                     |
| 0.017                                  | 0:7                                   | --                 | --   | --                       | --      | --                                     |
| --                                     | 0:1                                   | --                 | --   | --                       | --      | --                                     |
| --                                     | 0:0                                   | --                 | --   | --                       | --      | --                                     |
| 0.005                                  | 7:50                                  | 6                  | 5/51 | 1.29                     | 0.285   | 0.003                                  |
| --                                     | 0:0                                   | --                 | --   | --                       | --      | --                                     |
| --                                     | 0:0                                   | --                 | --   | --                       | --      | --                                     |
| --                                     | 0:0                                   | --                 | --   | --                       | --      | --                                     |
| --                                     | 0:0                                   | --                 | --   | --                       | --      | --                                     |
| --                                     | 0:0                                   | --                 | --   | --                       | --      | --                                     |
| --                                     | 0:8                                   | --                 | --   | --                       | --      | --                                     |
| --                                     | 0:0                                   | --                 | --   | --                       | --      | --                                     |
| --                                     | 0:3                                   | --                 | --   | --                       | --      | --                                     |
| --                                     | 0:0                                   | --                 | --   | --                       | --      | --                                     |
| --                                     | 0:0                                   | --                 | --   | --                       | --      | --                                     |
| --                                     | 0:0                                   | --                 | --   | --                       | --      | --                                     |
| 0.008                                  | 0:43                                  | --                 | --   | --                       | --      | --                                     |
| 0.005                                  | 0:187                                 | --                 | --   | --                       | --      | --                                     |
| 0.017                                  | 0:7                                   | --                 | --   | --                       | --      | --                                     |
| --                                     | 0:4                                   | --                 | --   | --                       | --      | --                                     |
| --                                     | 0:0                                   | --                 | --   | --                       | --      | --                                     |
| 0.017                                  | 0:8                                   | --                 | --   | --                       | --      | --                                     |
| 0.008                                  | 0:10                                  | --                 | --   | --                       | --      | --                                     |
| --                                     | 0:0                                   | --                 | --   | --                       | --      | --                                     |
| --                                     | 0:2                                   | --                 | --   | --                       | --      | --                                     |
| --                                     | 0:0                                   | --                 | --   | --                       | --      | --                                     |
| --                                     | 0:2                                   | --                 | --   | --                       | --      | --                                     |
